# Supplementary material
Source: publisher figshare collection journal article supplement (https://gsajournals.figshare.com/articles/dataset/_/22137590)
Supplement: Supplementary file 1 [file 1]

## Sheet: Relative metabolite content
Sample	X.8892..hexanoic.acid..7.11..Results	X.5950..L.alanine.1..7.4748..Results	X.6287..L.valine.2..9.151..Results	X.1176..urea..9.599..Results	X.700..ethanolamine..9.879..Results	X.6106..L.leucine.2..9.945..Results	X.753..glycerol..9.941..Results	X.938..nicotinic.acid..10.27..Results	X.791..DL.isoleucine.2..10.225..Results	X.145742..L.proline.2..10.321..Results	X.750..glycine..10.456..Results	X.439194..glyceric.acid..10.735..Results	X.638129..citraconic.acid..10.792..Results	X.5951..L.serine.2..11.174..Results	X.6288..L.threonine.2..11.464..Results	X.239..Beta..alanine..1..12.044..Results	X.92824..D.malic.acid..12.794..Results	X.649..5.6.dihydrouracil.2..12.773..Results	X.169019..D.threitol..12.954..Results	X.6137..L.methionine.2..13.188..Results	X.5960..aspartic.acid.2..13.207..Results	X.597..cytosine.2..13.255..Results	X.5810..trans.4.hydroxy.L.proline.2..13.267..Results	X.119..gamma.aminobutyric.acid..GABA...13.326..Results	X.33032..L.glutamic.acid.2..14.398..Results	X.135..4.hydroxybenzoic.acid..14.505..Results	X.236..L.asparagine.1..14.496..Results	X.66308..arabinose..14.897..Results	X.439240..D.lyxose.2..14.889..Results	X.993..ribose..15.113..Results	X.6912..xylitol..15.376..Results	X.94154..arabitol..15.601..Results	X.827..ribitol..15.66..Results	X.42953..diglycerol.2..15.958..Results	X.8468..4.hydroxy.3.methoxybenzoic.acid..15.989..Results	X.754..glycerol.1.phosphate..16.056..Results	X.738..L.glutamine.3..16.092..Results	X.72..3.4.dihydroxybenzoic.acid..16.586..Results	X.6262..L.ornithine.2..16.632..Results	X.9750..citrulline.2..16.691..Results	X.311..citric.acid..16.615..Results	X.190..adenine.1..17.066..Results	X.5984..fructose.1..17.18..Results	X.204..allantoin.2..17.356..Results	X.441032..D....altrose.1..17.397..Results	X.5962..L.lysine.2..17.643..Results	X.6274..L.histidine.3..17.658..Results	X.24749..D.glucose.2..17.625..Results	X.6057..tyrosine.2..17.871..Results
S-038	0.000264654	0.000528243	0.000271546	0.00161225	0.00346076	0.000146413	0.015229	0.00149915	0.000152658	0.000312117	0.00304215	0.000106398	0.00043762	0.00369072	0.000254939	0.000108757	0.000856458	0.000168016	0.00374355	0.000240228	0.00121909	0.000164146	3.66e-05	0.0035172	0.00717401	0.000163483	0.000163344	4.88e-05	0.00066966	0.000248787	0.00182991	0.00885033	0.0198807	0.000322386	6.66e-05	0.0177732	8.79e-05	6.75e-06	0.000366333	0	0.00799198	0.000773807	0.00298451	0.000639545	0.00389472	0.000252719	0.000896381	0.00300857	0.00286983
S-255	0.000119795	0.0076579	0.00107182	0.00157044	0.000787947	0.000439647	0.00495619	0.00215592	0.00033465	0.00152479	0.00453052	3.64e-05	0.000493757	0.00798791	0.00058707	0.000163967	8.2e-05	0.00162012	0.0011671	0.00051052	0.00114799	0.000140234	0.000130169	0.00189362	0.00360503	7.66e-05	0.00144163	4.35e-05	0.00059395	0.000157742	0.000322856	0.00384708	0.0191205	0.000192523	6.32e-05	0.030273	0.000205191	0	0.000453025	0.000216438	0.00588342	0.000555857	0.00299235	0.000889014	0.00109268	0.00127608	0.00182782	0.00899912	0.0101499
S-200	8.2e-05	0.00158349	0.000911497	0.00100215	0.00109794	0.000377891	0.00495172	0.000886557	0.000288684	0.000828129	0.00343021	4.7e-05	0.000330345	0.00169624	0.000474898	0.000245856	0.000227547	0.00337739	0.000280651	0.000442905	0.0047252	0.000119581	0.000359629	0.000782778	0.00378671	5.76e-05	0.00216123	3.75e-05	0.000784926	0.000186307	0.000202186	0.000152632	0.0189394	0.00020256	3.73e-05	0.0284824	0.000111952	0	0.000714355	0.000200505	0.00223138	0.000307989	0.000923267	0.000875301	0.00142082	0.00103008	0.00150311	0.00146369	0.00425161
S-196	7.38e-05	0.000329744	0.00036489	0.00137545	0.000434886	0.000133528	0.00370239	0.000628765	0.00015043	0.000215305	0.000700251	1.37e-05	0.000333671	0.00181068	0.000364045	9.85e-05	9.16e-05	0.00170295	0.000182743	7.98e-05	0.000441398	0.00012912	0.000179413	0.000303098	0.00287493	2.92e-05	0.00106464	3.7e-05	0.000533018	8.54e-05	0.000137654	0	0.019685	6.5e-05	3.46e-05	0.0220726	8.62e-05	0	4.44e-05	2.89e-05	0.0014699	0.000176049	0.000562945	0.000434041	0.00038751	0.000460637	0.00021958	0.000987342	0.00208644
S-367	6.54e-05	0.00475366	0.000518096	0.000487724	0.0082186	0.000161558	0.00834755	0.00228253	0.000167204	0.000240424	0.00506489	7.08e-05	0.000394059	0.00228863	0.000284775	0.000258729	0.000380125	0.00037284	0.000664263	0.000426252	0.0001749	0.000101513	0.000159236	0.00333261	0.00250351	0.000159873	0.000282089	7.55e-05	0.000509217	0.000215061	0.000905963	0.0086683	0.0190476	0.000374525	0.00019325	0.0266783	0.000252127	0	0.000214424	6.15e-05	0.00162163	0.000357009	0.00319805	0.000742265	0.000639265	0.000503343	0.000490365	0.00275058	0.00354867
S-366	4.21e-05	0.00217171	0.00066037	0.00188442	0.00198133	0.000251341	0.00352572	0.00140393	0.000262153	0.000359454	0.0022539	6.02e-05	0.000322845	0.00137594	0.00115699	0.000140064	0.000142832	0.000830494	0.000443396	0.000531864	0.00179319	0.000102898	8.46e-05	0.00100031	0.00264965	0.000116859	0.000625518	3.96e-05	0.000660721	0.000140591	0.000488575	0.00194213	0.0178891	0.000205503	5.77e-05	0.0258196	4.78e-05	1.41e-06	0.000458558	0.00017931	0.0016511	0.00032475	0.00106803	0.000754419	0.000815683	0.00116731	0.000781667	0.00306795	0.00385432
S-303	9.5e-05	0.000613737	0.00258958	0.000760757	0.00068797	0.00133	0.00206432	0.00042831	0.0015195	0.00126103	0	2.71e-05	0.000179129	0.00290091	0.000460212	8.56e-05	0.000439615	0.00140345	0.000268332	0.000253827	0	8.74e-05	0.000293731	0.000532483	0.00239083	2.61e-05	0.00099698	5.67e-05	0.000533774	0.000153008	0.000125958	NA	0.018018	0.00017056	6.96e-05	0.0211747	9.03e-05	0	1.96e-05	5.15e-05	0.00411909	0.000253018	0.00118303	0.000295176	0.000846295	0.000536097	0.000120951	0.00165227	0.00336298
S-347	8.82e-05	0.00264964	0.00122668	0.00130665	0.000988488	0.000675431	0.00589204	0.000624602	0.000831413	0.000838711	0.000259152	2.24e-05	0.000204621	0.00285557	0.00029064	8.5e-05	0.000172924	0.0010132	0.000461479	0.000191119	0	6.45e-05	0.000115213	0.000491142	0.00162498	0.000275469	0.000612299	5.14e-05	0.000682261	0.000176991	0.000875777	NA	0.0184502	0.000152332	0.000114014	0.018183	0.000187574	7.43e-05	5.06e-05	4.56e-05	0.00245086	0.000312449	0.00087119	0.000412318	0.000957365	0.000269057	3.86e-06	0.00129701	0.00409112
S-223	0.000182344	0.00541735	0.00126206	0.000443285	0.0063405	0.000207396	0.0179744	0.00227438	0.000325825	0.000567868	0.00496301	0.000361683	0.000409413	0.00328015	0.000323596	0.000189225	0.00164095	0.00272919	0.00274368	0.000427294	0.00253731	9.21e-05	0.000187819	0.00804977	0.00757252	0.000334644	0.00165345	9.49e-05	0.00132685	0.000419056	0.000829245	0.00111078	0.0185185	0.000294715	0.000141107	0.0243689	0.000336534	2.42e-07	0.000177353	4e-05	0.00723526	0.00370635	0.0299271	0.000633381	0.00946719	0.000737031	0.000450408	0.0136355	0.00505586
S-043	0.000124863	0.00612497	0.00163481	0.00170984	0.00158997	0.000648618	0.00554917	0.00276856	0.000421406	0.00184699	0.00372403	3.75e-05	0.000318963	0.00426192	0.000831226	0.000237857	0.000127453	0.00273441	0.000395548	0.000567512	0.00368847	7.42e-05	9.95e-05	0.00385657	0.00896338	0.000151145	0.00255434	2.87e-05	0.000519658	0.000100135	0.00171445	0.00223792	0.0195695	0.000149543	7.11e-05	0.0298693	6.82e-05	0	7.37e-05	9.2e-05	0.00454631	0.000361322	0.00163876	0.000954017	0.000802118	0.000556255	0.0014262	0.00390061	0.00765879
S-003	6.22e-05	0.00313885	0.00199238	0.00422565	0.00144828	0.00112589	0.0103058	0.00133491	0.000806351	0.00140966	0.00508206	7.07e-05	0.000319328	0.00345038	0.000813316	0.000223056	0.000327437	0.00219485	0.000707064	0.000322863	0.00105098	9.56e-05	0.000461136	0.000918061	0.00354016	0.000108383	0.00136121	5.35e-05	0.000666258	0.000207254	0.000334767	NA	0.0185185	0.000172789	9.5e-05	0.0245133	0.000108539	1.21e-05	0.000612197	0.000343396	0.0103535	0.00050669	0.00273687	0.000542904	0.00185723	0.00185676	0.00123604	0.0034599	0.0066053
S-046	6.24e-05	0.000814043	0.000625295	0.00631476	0.00242541	0.000252769	0.0101638	0.00117643	0.000339185	0.000352642	0.000955742	5.53e-05	0.00020803	0.00112426	0.000665113	0.00014647	0.000661598	0.00328389	0.00121509	3.76e-05	0	8.03e-05	0.000203009	0.000847334	0.00260858	4.99e-05	0.00156472	7.72e-05	0.00149482	0.000265875	0.000606917	0.000791247	0.0193424	0.000133916	6.96e-05	0.0176933	7.36e-05	0.000764835	0	1.71e-05	0.00541279	0.000389916	0.00151114	0.000810729	0.00181001	0.000300521	9.87e-05	0.00154719	0.00411656
S-106	8.12e-05	0.00277854	0.00151984	0.000736886	0.000812659	0.00077004	0.00226756	0.000549833	0.000678565	0.0109203	0.000844062	1.32e-05	9.79e-05	0.00947136	0.000881429	0.000121182	0.000177041	0.000825242	0.00214829	0.000263428	0.00125898	7.81e-05	3.3e-05	0.000554648	0.00632341	2.03e-05	0.000557711	1.75e-05	0.000459836	9.71e-05	0.000319231	0.00376644	0.0189036	0.000110842	1.11e-05	0.0325725	0.00022896	1.2e-06	9.06e-05	0.000130647	0.00532386	0.000225149	0.00406559	0.000711719	0.000928261	0.00046837	0.000526527	0.00371479	0.00487169
S-085	0.000178866	0.0104867	0.0108436	0.00452565	0.0205668	0.00330425	0.0147881	0.00168426	0.00615616	0.00527202	0.00204372	0.000121426	0.000260818	0.0203538	0.00295134	0.001483	0.000399028	0.00451723	0.00130005	0.0027708	0.0137678	7.85e-05	0.000194961	0.0329354	0.02018	0.000144264	0.00265164	0.000215387	0.00188789	0.000172172	0.000434959	0.00124502	0.0183824	8.65e-05	3.52e-05	0.0280244	0.00199046	5.86e-06	0.000459273	0.000128071	0.00827755	0.000599223	0.00278758	0.000750657	0.00297895	0.00544355	0.00214506	0.00305406	0.0132916
S-067	3.74e-05	0.000877214	0.000821585	0.00200104	0.000482807	0.000327375	0.00293313	0.000866455	0.000199558	0.000460794	0.000947369	3.91e-05	0.000161531	0.00134857	0.000455042	0.000168968	0.000319045	0.004099	0.000379334	0.000205706	0.0030901	8.56e-05	0.000211755	0.00060398	0.00578357	7.56e-05	0.00197838	8.57e-05	0.00062396	0.000121322	0.000152904	0.000731201	0.019084	7.96e-05	4.24e-05	0.0215001	0.000179528	1.69e-06	0.00055207	0.00021582	0.00706654	0.000163431	0.00121411	0.000488806	0.000563325	0.000919307	0.00086938	0.00182146	0.00334841
S-057	3.79e-05	0.000599639	0.000562761	0.00302818	0.000517637	0.000177231	0.00416879	0.000713384	0.000144347	0.000361101	0.00103024	1.78e-05	0.000160115	0.000932524	0.000228632	0.000108144	2.59e-05	0.00262325	0.000199326	0.000160218	0.00183611	7.75e-05	0.000257003	0.000333092	0.00488591	1.91e-05	0.00112697	4.06e-05	0.000540043	0.000122148	8.98e-05	0.000448134	0.0181488	7.76e-05	7.99e-06	0.0281146	9.83e-05	9.54e-06	0.000222822	0.000160893	0.00796543	0.00015453	0.000873914	0.000383248	0.000892223	0.00104165	0.000738073	0.00193766	0.00397683
S-294	6.82e-05	0.00142999	0.00314887	0.00206947	0.000520354	0.0015071	0.00298331	0.000962707	0.0014908	0.00260837	0.000430876	2.07e-05	0.000199261	0.00109036	0.000748022	0.000127648	0.000144681	0.00325029	0.000317354	6.54e-06	0.00135624	7.42e-05	0.000230992	0.000371726	0.00317146	4.24e-05	0.00143695	4.02e-05	0.00116514	0.000173919	0.000224188	NA	0.0188679	0.000255503	4.99e-05	0.025956	5.04e-05	0.00107649	0	4.47e-06	0.00578164	0.000263622	0.000858636	0.00049579	0.00114696	0.000253686	NA	0.00149807	0.00568344
S-225	6.87e-05	0.00160014	0.00126185	0.00194413	0.00135015	0.000422744	0.00680137	0.00132374	0.000388096	0.000480734	0.00388759	6.01e-05	0.000201504	0.00164561	0.000964977	0.000242828	0.000467235	0.00345709	0.00249528	0.000345943	0.00529865	0.000107761	0.000307835	0.00082234	0.00366103	0.000177772	0.00118178	7.03e-05	0.000803676	0.00020282	0.000485071	0.00224607	0.0199203	0.000229037	0.000132744	0.0238649	1.6e-05	1.76e-05	0.000576004	0.000209057	0.00802604	0.000521392	0.00221722	0.000874775	0.0019513	0.00120386	0.000940026	0.00233164	0.00824601
S-322	6.54e-05	0.00135352	0.00191271	0.000473568	0.000404425	0.000953487	0.00174566	0.00107081	0.00057044	0.00267307	0.000206653	5.22e-05	6.57e-05	0.00354734	0.000482708	0.000180628	0.000405355	0.00320953	0.000395647	0	0.00268262	5.19e-05	0.000152279	0.000394562	0.00729969	5.24e-05	0.00141182	0.000143397	0.00164569	0.000215535	0.000286124	0	0.0187617	6.81e-05	7.02e-06	0.0290884	0.00027404	0.00112126	0	5.83e-05	0.0123264	0.000239874	0.00203411	0.000963402	0.00149671	0.000317726	0.000489524	0.00298336	0.00598557
S-005	0.000103077	0.00186006	0.00143945	0.000609363	0.0059187	0.000873246	0.00520278	0.00115727	0.000699761	0.00122847	0.00294324	2.41e-05	0.000141414	0.00291475	0.000766092	0.000140469	0.000137784	0.00407818	0.000445573	0.000327529	0.00159454	6.89e-05	0.000146187	0.000441844	0.00260616	0.000112922	0.00166674	0.000138281	0.00077181	0.000203519	0.000472722	0.00330468	0.0185185	0.000182038	6.83e-05	0.0317628	4.21e-05	8.25e-06	0.000310623	0.000184823	0.00324302	0.000489844	0.00128556	0.000609711	0.00145586	0.000742722	0	0.00265594	0.00504382
S-016	5.99e-05	0.0015309	0.000957665	0.00495403	0.000213543	0.000346373	0.00439158	0.000687618	0.000422857	0.00111513	0	1.78e-05	8.1e-05	0.00447504	0.000385804	8.22e-05	0.000122628	0.00280634	0.000179503	2.7e-05	0.000863315	8.09e-05	7.31e-05	0.00020276	0.00543133	0	0.00114927	3.32e-05	0.00104155	0.000107406	0.000191766	NA	0.0184843	5.74e-05	3.5e-05	0.0227206	6.98e-05	0.000889215	0	0	0.0142763	0.000154255	0.000733657	0.000632012	0.00035816	0	0	0.00173271	0.00249158
S-049	0.000145019	0.00100778	0.000709657	0.0216308	0.000707925	0.000279794	0.00806524	0.00178843	0.000293935	0.00175322	0.00194817	8.25e-05	0.000182681	0.00941327	0.0009186	0.000154832	0.000116737	0.00848371	0.00204816	0.000133331	0.00715761	0.000132514	NA	0.00078094	0.0155441	0.00042842	0.00539328	0.000250213	0.00139955	0.000108801	0.000485707	0.00527293	0.0534759	9e-05	6.39e-05	0.0416513	0.000384265	3.42e-05	0	8.93e-05	0.0147934	0.000372625	0.00259592	0.000782672	0.000552805	0.000539818	0	0.00481941	0.00363299
S-054	6.73e-05	0.00235006	0.00120263	0.00113413	0.000635887	0.000677794	0.00594117	0.000747252	0.00056511	0.0102812	0.00046826	1.67e-05	8.96e-05	0.00368934	0.000363809	8.43e-05	4.6e-05	0.00132535	0.000557351	0.000146621	0	4.55e-05	0.000232071	0.000761977	0.00309615	8.13e-05	0.000436592	3.3e-05	0.000459657	0.000114743	0.00131854	0	0.0189753	8.46e-05	8.12e-05	0.0246949	6.64e-05	6.39e-06	0	8.27e-05	0.00173016	0.000189338	0.0012885	0.000378429	0.00103395	0.000452637	0.000408302	0.00163284	0.00297866
S-063	0.000143654	0.00433009	0.000984378	0.00166692	0.00243675	0.000714501	0.00436297	0.00181132	0.000479734	0.00155226	0.001063	1.59e-05	6.48e-05	0.00412178	0.000560956	8e-05	3.6e-05	0.000460386	0.000445983	0.000283105	0	7.41e-05	4.65e-05	0.0020883	0.00342767	0.000163435	0.000300289	7.6e-05	0.000483504	0.00014625	0.00127057	NA	0.0197628	0.000433744	9.94e-05	0.033291	2.73e-05	1.24e-05	3.03e-06	7.18e-05	0.00115418	0.000271134	0.00166074	0.000947599	0.000912798	0.000562996	0.000722969	0.0031463	0.00352311
S-102	9.94e-05	0.00235687	0.00160641	0.000410469	0.0015337	0.000645182	0.00442342	0.0010249	0.000616007	0.0068633	0.00158961	0.000110101	0.000169008	0.006977	0.000496012	0.000177684	0.000283117	0.00473084	0.00266069	2.3e-05	0.00405912	5.55e-05	0.000331673	0.00158515	0.00876901	6.28e-05	0.00203935	0.000121872	0.00171996	0.000225834	0.000313864	0.00206574	0.0185529	0.00012243	9.89e-06	0.0218132	0.000520316	0.00176852	0	1.81e-05	0.0112405	0.000670517	0.010036	0.000483328	0.00335701	0.00026135	0.000509965	0.00682631	0.00380645
S-103	6.2e-05	0.00116262	0.00076796	0.000584028	0.000593652	0.000179637	0.00315633	0.00268509	0.000187088	0.00156551	0.000251296	2.97e-05	9.28e-05	0.0026497	0.000371951	0.000129399	0.000307536	0.00179001	0.000551071	0.000602137	0.00303992	6.09e-05	9.19e-05	0.000690973	0.00627499	9.83e-05	0.000579165	3.36e-05	0.000572284	0.000134211	0.000172963	0.000324299	0.0196078	3.34e-05	3.57e-05	0.0307526	0.000324351	2.26e-05	0.000432434	0.000210991	0.00334652	0.000183897	0.00162062	0.000548173	0.000686834	0.000940302	0.000844534	0.00368355	0.00514942
S-120	7.05e-05	0.00387963	0.00215155	0.000788384	0.000779268	0.00106365	0.00392804	0.000967824	0.000736988	0.00331825	0.00205688	1.22e-05	4.81e-05	0.00317722	0.000592703	0.000115837	0.00034683	0.00370805	0.000831555	0.000202702	0.000322678	6.57e-05	0.00033127	0.00165253	0.0033116	0.00012904	0.0011732	3.38e-05	0.000461882	0.000142504	0.000320006	0.000147743	0.0191571	0.00013365	9.8e-05	0.0294093	0.000201707	1.19e-05	0.000481581	0.000348926	0.00583487	0.000306559	0.00207732	0.00046272	0.0014733	0.00139508	0.00087703	0.00354045	0.00439432
S-145	8.61e-05	0.00631694	0.00148974	0.00282498	0.000673376	0.000741412	0.0057109	0.00209247	0.000613424	0.00344544	0.00265175	3.95e-05	0.000105891	0.00425745	0.00040484	0.000152585	0.000136129	0.0016671	0.000816018	0.000302205	0.0020631	5.15e-05	0.000213468	0.00132727	0.00270188	0.0001163	0.000789676	4.32e-05	0.000570335	0.000200385	0.000329652	NA	0.018315	9.89e-05	4.82e-05	0.0329981	8.21e-05	7.68e-06	4.07e-05	0.000127755	0.00508038	0.000338626	0.00127447	0.000326919	0.000967847	0.00128773	0.000447173	0.00584738	0.00582976
S-154	0.000142939	0.00110306	0.00259988	0.0044281	0.00338323	0.00136954	0.00673262	0.00110455	0.000876391	0.00223189	0.000999765	0.000104097	0.000130682	0.00583821	0.000681375	0.000163309	0.001497	0.00283811	0.00208291	0.000206524	0.000808202	7.14e-05	0.000274944	0.00178995	0.00321445	0.000105132	0.00109137	0.000102831	0.00125123	0.000242374	0.000280353	0.00441953	0.0189753	0.000193404	5.31e-05	0.0221484	0.000353203	2.05e-05	0	6.69e-05	0.00797614	0.000793029	0.00917546	0.000401137	0.00400032	0.0005168	0.000418285	0.00431342	0.00418187
S-156	0.000119632	0.00265669	0.0012937	0.000334049	0.000426945	0.00078295	0.00219599	0.00147035	0.000629913	0.00102463	0.00104228	1.21e-05	8.42e-05	0.00222809	0.000444651	0.000147076	0.00011674	0.00116044	0.000242687	0.000188035	0.00496364	5.78e-05	5.12e-05	0.000864101	0.00640477	6.32e-05	0.000485374	3.11e-05	0.000481479	0.00011615	0.000515474	NA	0.0199601	0.000138636	1.68e-05	0.0345829	0.000106412	1.22e-05	0	7.31e-05	0.00621744	0.000204876	0.00126531	0.000455511	0.000500011	0.000393422	0.000147607	0.00318256	0.00427264
S-159	9.82e-05	0.000203572	0.000648283	0.000496562	0.000299319	0.00075512	0.0015636	0.00102698	0.000930589	0.000883093	0	2.03e-05	1.5e-05	0.00242974	0.000311338	4.62e-05	0.000367951	0.0011809	0.000283526	9.89e-05	0	3.42e-05	6.15e-05	0.000165714	0.00399218	5.76e-05	0.000420905	4.56e-05	0.000652928	8.54e-05	7.8e-05	NA	0.019685	9.5e-05	1.89e-05	0.0210247	0.000125999	2.8e-05	0	2.43e-05	0.00415522	0.000141347	0.00077492	0.000322835	0.00117144	0.000201714	0	0.00205552	0.00229155
S-174	7.68e-05	0.00140914	0.000966855	0.00227213	0.000528586	0.000577343	0.00265858	0.0018275	0.000363605	0.00210805	0	8.76e-06	8.7e-05	0.00343971	0.000301835	5.58e-05	8.13e-05	0.00158456	0.000148729	0.000394371	0.000418479	5.15e-05	4.58e-05	0.000320306	0.00465448	7.67e-05	0.000671198	4.95e-05	0.000421597	8.29e-05	0.000352031	NA	0.0194553	0.0002078	2.66e-05	0.0346174	7.6e-05	2.85e-05	2.64e-06	8.39e-05	0.00174054	0.000188929	0.0010336	0.00062388	0.000630357	0.000559891	5.75e-05	0.00286554	0.00674262
S-191	6.63e-05	0.00199036	0.00261055	0.000540475	0.0270736	0.00108106	0.00418337	0.00124794	0.000952787	0.00253608	0.00169003	7.5e-05	0.000141863	0.00260907	0.000832505	0.000182433	0.000451665	0.00507559	0.00125206	2.41e-05	0.0018604	6.91e-05	0.000205759	0.00106921	0.00376005	0.000174076	0.00183803	8.71e-05	0.00145692	0.000163708	0.000444154	0.00200264	0.0191571	7.06e-05	0.00017233	0.0228449	2.66e-05	0.00119975	9.79e-06	6.71e-05	0.00608455	0.000408733	0.00133505	0.000552006	0.0010188	0.000492817	0.000353123	0.00174113	0.00766012
S-206	6.68e-05	0.00265033	0.00115429	0.000490497	0.00360318	0.000526717	0.00649772	0.00288058	0.000453186	0.00105131	0.00202657	5.3e-05	0.00013637	0.00366689	0.000379219	0.000190591	0.000325816	0.002265	0.00124206	0.000666906	0.00270221	8e-05	0.000126934	0.00206754	0.00592507	0.000141007	0.00170447	3.15e-05	0.000615412	0.000185955	0.000588302	0.0047039	0.0195695	0.000283596	3.4e-05	0.0301374	0.00014968	2.83e-05	7.11e-05	0.00014788	0.00163972	0.000291087	0.0032473	0.000662051	0.00144367	0.000809931	0.000615139	0.00388077	0.00370409
S-214	7.26e-05	0.00857916	0.000835865	0.000372485	0.000988491	0.000315957	0.00659988	0.0028144	0.000236317	0.000705501	0.00948611	6.22e-05	0.000326062	0.00154427	0.000528363	0.000405501	0.000117408	0.00218634	0.00132046	0.000792244	0.000203251	8.43e-05	0.000318158	0.00237583	0.0046325	0.000289594	0.000727461	4.99e-05	0.000573835	0.000187343	0.000749973	0.00172186	0.0188679	0.000212205	0.000125162	0.0222792	0.000273736	1.33e-05	0.000252626	0.000178289	0.00353876	0.000311171	0.003128	0.000349524	0.000943819	0.00066363	0.000575236	0.00509693	0.00852178
S-270	0.000145429	0.00412267	0.00297495	0.000458969	0.00129378	0.00181994	0.00426569	0.00192589	0.00101162	0.00722611	0.00192779	3.19e-05	0.000102371	0.00960884	0.000528197	0.000156431	0.000224029	0.00107786	0.000380867	0.000302176	0.00170992	4.6e-05	0.00014561	0.00549595	0.00436078	0.000165939	0.000407399	8.44e-05	0.000673671	0.000169561	0.00118417	0.00313319	0.0182815	9.9e-05	7.7e-05	0.0285546	7.62e-05	2.4e-05	0.000215789	0.000143844	0.00343614	0.000377215	0.0047564	0.000548934	0.000882261	0.000831279	0.000536936	0.00471095	0.00626122
S-285	0.000134332	0.00144614	0.000697467	0.00244358	0.000985373	0.000265786	0.00459992	0.00255555	0.00014625	0.00145104	0.000697619	3.32e-05	8.3e-05	0.00641886	0.000367697	0.000128474	5.69e-05	0.00105648	0.000729586	0.000128929	0.00143978	5.75e-05	3.62e-05	0.000861848	0.00547737	9.58e-05	0.000389665	4.27e-05	0.000400522	0.000143624	0.000150392	NA	0.0194932	0.000235334	5.75e-05	0.0332477	0.000110193	1.32e-05	0.000143826	0.000189479	0.0035242	0.000183183	0.00109829	0.000784177	0.00055561	0.000791399	0.000299571	0.00275058	0.00498322
S-299	0.000356971	0.00945125	0.00374104	0.000763064	0.0169318	0.00143209	0.0168974	0.00519418	0.00124596	0.00516739	0.00967962	0.000174648	0.00031404	0.0147171	0.00194836	0.000608619	0.00120738	0.00985803	0.00906347	0.000135678	0.00423869	9.47e-05	0.000267741	0.0254046	0.01372	0.000345038	0.00371564	9.45e-05	0.00179813	0.00042179	0.00101303	0.00398076	0.018622	0.000391782	8.14e-05	0.0333382	0.00257515	0.00106978	5.55e-05	4.91e-05	0.00582097	0.000834237	0.004582	0.00177891	0.00508871	0.000307107	0.000729342	0.00388623	0.00576358
S-313	0.000101916	0.00309182	0.003402	0.00180297	0.00259462	0.00114562	0.0111676	0.00212305	0.00150257	0.00177383	0.00919462	0.000129707	0.000186747	0.00737057	0.0014511	0.000588789	0.00150333	0.00688034	0.00220561	0.00129312	0.00299088	4.99e-05	0.000409503	0.0019569	0.0113373	0.000338567	0.00217814	7.13e-05	0.000957255	0.000203021	0.000711521	0.00944614	0.0195312	8.09e-05	0.000138682	0.0250733	0.00134973	3.1e-05	0.000258602	0.000149387	0.00381556	0.000868712	0.0109704	0.000611659	0.00380118	0.00110307	0.000606793	0.00564821	0.00645165
S-323	0.000166133	0.00269947	0.0019046	0.00203346	0.00119065	0.000588462	0.00619355	0.00263411	0.000450941	0.00177547	0.00268448	8.65e-05	8.83e-05	0.00813885	0.000860758	0.000208736	0.00106712	0.00241593	0.000693833	0.000496922	0.0070996	7.56e-05	0.000137521	0.00331464	0.00691156	0.000269973	0.000702332	6.37e-05	0.000737808	0.000182287	0.000313315	0.00037545	0.0181488	0.000154044	0.000129444	0.0282279	8.1e-05	1.15e-05	0.000549238	0.000323662	0.00496373	0.000690736	0.00623029	0.000478392	0.00115607	0.00148258	0.000915238	0.00580121	0.00989077
S-332	0.000167732	0.00475622	0.0017505	0.00037535	0.000992087	0.000578287	0.00294276	0.00209585	0.000428903	0.00202007	0.00679708	3.99e-05	0.000128591	0.00760527	0.00111318	0.000246971	0.000330518	0.000747668	0.000644976	0.000248301	0.00451409	7.82e-05	0.000124124	0.0022037	0.00682048	0.000226018	0.000383912	4.71e-05	0.00058302	0.000126996	0.00137238	0.00157197	0.0198807	0.000117051	0.000100671	0.0318773	7.89e-05	1.53e-05	0.000369553	0.000245695	0.00728917	0.000393077	0.00633351	0.000278986	0.000620938	0.000898648	0.00070757	0.00413209	0.0068818
S-352	0.000178373	0.00740972	0.0028957	0.00271951	0.0013307	0.000927227	0.00796453	0.0030061	0.000709127	0.00273478	0.00372585	5.36e-05	0.000120389	0.0114266	0.000567382	0.000126359	0.000193701	0.00203949	0.000734789	0.000421044	0.00201899	4.86e-05	0.000233658	0.00198058	0.00525444	0.000363232	0.00073146	3.93e-05	0.000559345	0.000161322	0.00036794	0.00221975	0.019084	0.00012877	0.000108792	0.0317593	7.92e-05	1.94e-05	0.00018153	0.000181702	0.00635396	0.00091674	0.00480641	0.000676805	0.00157963	0.000969768	0.000465709	0.0041466	0.00776285
S-407	0.00010579	0.00125745	0.00151911	0.000674824	0.000751799	0.0011035	0.00318793	0.00134477	0.000505247	0.00147391	0.00194918	1.45e-05	0.000132629	0.00132693	0.000332126	0.000229008	6.78e-05	0.00131776	0.000229357	0.000180848	0.00188609	7.1e-05	0.000500832	0.00176328	0.00218052	8.27e-05	0.000534468	4.57e-05	0.000754356	0.000187645	0.000135767	NA	0.0196078	0.0003018	7.18e-05	0.0266005	6.94e-05	7.67e-06	0	0.000109217	0.00262854	0.000230422	0.00173046	0.000272463	0.00155205	0.00078166	4.9e-05	0.00189754	0.00171541
S-260	0.000135767	0.00513862	0.00202698	0.00055039	0.00150969	0.000993582	0.00870344	0.00250785	0.000643421	0.00864987	0.00602893	4.01e-05	0.000126422	0.00579025	0.000336531	0.00020874	0.000165944	0.00565192	0.0006858	0.000485214	0.00432735	4.98e-05	0.000244512	0.000564496	0.00293099	0.000187074	0.00228352	4.71e-05	0.000445276	0.000139755	0.000432598	0.000347542	0.0196078	0.000155052	9.17e-05	0.0392782	6.9e-05	9.64e-06	0.000295164	0.000357006	0.00514808	0.000559099	0.00168777	0.000794485	0.00235822	0.00512493	0.000983702	0.00370589	0.0135141
S-410	0.00012491	0.00934202	0.00172822	0.00281588	0.0022452	0.000760071	0.00932292	0.00384472	0.000489635	0.00458165	0.0117907	9.03e-05	0.000175591	0.0121628	0.000586046	0.000257046	0.00011066	0.00249395	0.00193914	0.000669218	0.00284301	6.23e-05	0.000236227	0.000740819	0.00834562	0.000155329	0.00129377	5.58e-05	0.00042435	0.00019641	0.000502621	0.00415891	0.0188324	0.000186102	2.63e-05	0.033969	0.000299289	1.5e-05	0.000326878	0.000298126	0.00164121	0.000362064	0.0104294	0.000676949	0.000948042	0.0011446	0.000809944	0.00507416	0.0067989
S-105	0.000104257	0.00167246	0.0011191	0.000449788	0.000615949	0.000375776	0.004559	0.00329754	0.000307319	0.0017676	0.000620247	1.75e-05	8.36e-05	0.00321734	0.00031775	0.000146295	5.57e-05	0.00239303	0.00127619	0.000330697	0.00389991	5.4e-05	8.45e-05	0.000576322	0.00701006	0.000153738	0.000855022	4.49e-05	0.000445018	0.000121135	0.000185555	0.006242	0.0188324	5.29e-05	2.62e-05	0.0333532	0.0002169	2.09e-05	0.000383271	0.000319113	0.0026179	0.000186307	0.00115521	0.000536328	0.000573754	0.00135723	0.0007526	0.00299541	0.00589521
S-344	7.47e-05	0.00321427	0.00110333	0.00264226	0.000846421	0.00031173	0.00817953	0.0021805	0.000323151	0.00141044	0.00508554	2.81e-05	0.000242428	0.00293556	0.000645679	0.000198511	0.000182522	0.0140944	0.000932958	0.000352637	0.00896169	0.00010571	0.00031635	0.000725934	0.00713481	0.00016212	0.00510858	2.4e-05	0.000641214	0.000160823	0.000259507	0.00387822	0.0191939	8.29e-05	6.45e-05	0.0329078	0.000317181	1.77e-05	0.000733306	0.000381552	0.00565558	0.000352758	0.00142103	0.00156779	0.000649364	0.00103818	0.000585046	0.002384	0.00429207
S-254	9.59e-05	0.00161246	0.00198746	0.000364546	0.00172181	0.000735196	0.00288077	0.00193971	0.000468355	0.00797193	0.00319378	2.02e-05	4.39e-05	0.00995272	0.000576685	0.000156759	0.000156702	0.00251396	0.00042699	0.00031284	0.00120005	4.59e-05	8.14e-05	0.00107714	0.00401928	0.000122683	0.00120186	8.62e-05	0.000532551	0.000126074	0.000410602	0	0.0190476	0.000193095	3.47e-05	0.0368593	9.43e-05	8.76e-06	0.000228583	0.00028515	0.00308641	0.000438198	0.00650171	0.000744237	0.000850646	0.00515163	0.000393367	0.00477306	0.0102935
S-325	9.29e-05	0.00569676	0.000828589	0.000661663	0.00220152	0.000221756	0.0117168	0.00334756	0.000292171	0.000506769	0.00217126	5.32e-05	0.000121996	0.00304874	0.000451228	0.000126616	0.000367816	0.00493716	0.000579824	0.000452345	0.0031121	7.29e-05	0.000133521	0.00102516	0.00367385	0.000232011	0.00187731	6.52e-05	0.000793508	0.000219014	0.00127763	0.000652271	0.0192308	0.000366547	9.85e-05	0.0313851	4.06e-05	2.26e-05	0	2.57e-05	0.0058052	0.000452311	0.00195514	0.000929415	0.00244794	0.000373756	7.92e-06	0.00209054	0.00480593
S-359	8.59e-05	0.00249084	0.0012897	0.000851537	0.000865352	0.000815929	0.00345054	0.00148263	0.00061117	0.00150795	0.000436826	2.6e-05	3.86e-05	0.004597	0.000427616	0.000130866	0.000163903	0.002821	0.000362933	0.000226284	0	4.9e-05	0.000123744	0.000944171	0.00305382	0.000526729	0.00108066	2.75e-05	0.00059682	0.000149553	0.00106727	NA	0.0188324	0.000221304	0.000113035	0.0292651	5.68e-05	2.32e-05	2.57e-05	3.38e-05	0.00196057	0.000221376	0.000894266	0.000556447	0.000726829	0.000318757	0	0.00123503	0.00187372
S-264	0.000191348	0.0060774	0.00170271	0.00100135	0.0135747	0.000480966	0.00883545	0.00264765	0.000326325	0.00184116	0.00544803	9.19e-05	0.000173161	0.00581934	0.000509342	0.000298711	0.000648604	0.00645224	0.000734637	0.000103173	0.00539456	7.73e-05	0.000145737	0.0034975	0.00634587	0.00026705	0.00223795	6.94e-05	0.00125136	0.000254623	0.0022431	0.000799055	0.0181488	0.00020287	5.43e-05	0.0310768	1.04e-05	0.00110286	8.67e-05	7.33e-05	0.00728933	0.000437894	0.00227328	0.00050958	0.00150693	0.00051915	0.000894991	0.00309914	0.00739051
S-282	0.000127814	0.00264063	0.000896218	0.000522233	0.00093418	0.000257624	0.00440425	0.00319826	0.000232243	0.00219562	0.00295773	3.3e-05	0.00010738	0.00568339	0.000404528	0.000163477	0.000125254	0.00598731	0.00077938	0.00040891	0.00651401	6.21e-05	0.000134365	0.000815303	0.00972069	0.000156839	0.00162948	4.1e-05	0.000441709	0.000158618	0.000312073	0.00347211	0.0184502	0.00018235	5.61e-05	0.0288712	0.000584665	2.09e-05	0.000415678	0.000214499	0.00479655	0.000251998	0.00108772	0.000507742	0.000880035	0.000712262	0.00056141	0.00184432	0.00476123
S-378	0.000112954	0.00450416	0.00509308	0.000304926	0.00493008	0.00289645	0.00497004	0.00261155	0.00232505	0.0139575	0.00563396	4.29e-05	0.000122744	0.0103629	0.00121574	0.000426465	0.000165315	0.000858402	0.00207058	0.000817789	0.00166565	5.58e-05	0.000248048	0.00488103	0.00574676	0.000207986	0.000363361	7.77e-05	0.000572502	0.000223097	0.00040287	0.00421043	0.018797	0.000195888	6.82e-05	0.0256177	0.001791	2.81e-05	0.000327216	0.000255979	0.00344586	0.000387123	0.0102852	0.000786864	0.00158929	0.00183573	0.00169286	0.0115801	0.0113407
S-348	0.000104158	0.00285671	0.00181869	0.00182231	0.000907715	0.00113178	0.00467601	0.00138784	0.000831125	0.00210227	0.00132471	4.92e-05	7.57e-05	0.00317713	0.000371484	0.000155167	0.000461731	0.00348308	0.000558653	5.3e-06	0	4.63e-05	0.000283378	0.000678812	0.00275015	0.000262281	0.00141887	0.000108744	0.00101559	0.000147116	0.000399001	NA	0.0193798	8.18e-05	7.49e-05	0.0137195	0.000712036	0.000993936	6.34e-05	9.07e-06	0.0116571	0.000395502	0.00170755	0.000467132	0.00159804	0.000129382	7.03e-05	0.00171678	0.0048695
S-278	0.000107695	0.00172553	0.00171402	0.00118786	0.000592188	0.000373854	0.00541289	0.00295492	0.000451116	0.00237097	0.00125235	2.88e-05	8.85e-05	0.00401058	0.000638246	0.000124044	0.000103891	0.00958266	0.000726649	0.00112659	0.0115324	6.3e-05	0.000107016	0.00122391	0.0133966	0.000225626	0.00277322	5.7e-05	0.000788603	0.000162947	0.000307914	0.00364203	0.0195312	0.00015158	6.97e-05	0.026268	0.00145968	2.08e-05	0.00123931	0.000640692	0.00642082	0.000213821	0.00142024	0.000928226	0.000906896	0.0221165	0.000956033	0.00337805	0.00707297
S-221	0.000116999	0.00228983	0.00216956	0.00252718	0.000921545	0.00110664	0.00571053	0.00192381	0.000933062	0.00161749	0.00131847	5.5e-05	0.000125973	0.00449567	0.000707751	0.000139266	0.000240284	0.00356102	0.000957249	0.000292065	0.00251283	5.65e-05	0.000148384	0.00112915	0.00577281	0.000318651	0.00130421	4.55e-05	0.000724787	0.000202276	0.00024777	0.00144948	0.0193424	0.000194502	7.9e-05	0.0296493	6.04e-05	2.56e-05	0.000258904	0.00020482	0.00569541	0.000329609	0.001789	0.000360018	0.00229755	0.000730786	0.000362658	0.00258122	0.00305895
S-220	8.75e-05	0.00228197	0.00254563	0.000488362	0.000808467	0.00068306	0.00385074	0.00220528	0.000801857	0.00573046	0.00192932	7.77e-05	0.000107657	0.0126391	0.00241227	0.000192387	0.00055585	0.00334213	0.00121316	0.000458501	0.00601224	4.62e-05	0.000164837	0.000961887	0.00925055	0.000242633	0.00180812	6.82e-05	0.000700348	0.000184575	0.000173481	0.00200083	0.0191205	7.95e-05	5.23e-05	0.0301293	0.000154991	2.34e-05	0.000356114	0.000276099	0.00659153	0.000231462	0.00629745	0.00051129	0.000714493	0.00136986	0.000731134	0.00527112	0.0105742
S-341	8.09e-05	0.000930529	0.00158065	0.00100045	0.000827761	0.000727515	0.00245177	0.00150453	0.000603613	0.00126758	0.00010729	4.43e-05	4.56e-05	0.00336326	0.000351191	0.000102816	0.000375324	0.00292239	0.000591094	6.54e-05	4.13e-05	3.42e-05	0.00012295	0.000449342	0.00387872	0.000146845	0.00107219	6.79e-05	0.00200695	0.000252422	0.000430683	0.00241507	0.0191939	5.25e-05	4.82e-05	0.0294468	9.26e-05	0.00105443	0	1.94e-05	0.00503477	0.000221545	0.000948902	0.000497085	0.00114473	0.000168646	0	0.00210315	0.00239265
S-338	5.89e-05	0.00237136	0.00229143	0.00405285	0.0014324	0.00139923	0.0180013	0.00151777	0.00124529	0.00124862	0.0165945	6.41e-05	0.00013879	0.0132099	0.00130063	0.000156393	0.000564451	0.00390292	0.00176925	0.000385543	0.00682763	5.69e-05	0.00025582	0.00123335	0.00369848	0.000233343	0.000994873	3.75e-05	0.000868134	0.000204407	0.000432348	0.00182735	0.0178891	0.000162022	7.65e-05	0.0207925	3.49e-05	1.9e-05	0.00720625	0.000338361	0.00583536	0.00033486	0.00210885	0.000489012	0.0031273	0.00312398	0.0019276	0.00178885	0.00595126
S-358	0.000106973	0.00191119	0.00139798	0.000317519	0.000858696	0.000992133	0.00341332	0.00102219	0.00041784	0.00481693	0.00184029	2.08e-05	8.9e-05	0.00339642	0.000498009	0.000122463	0.000148975	0.00211552	0.0010388	0.000141789	0.000402253	4.18e-05	0.00025352	0.000576381	0.00451544	0.000178547	0.000686316	6.23e-05	0.000644022	0.000212197	0.000345829	0.00506773	0.019305	0.000137273	9.39e-05	0.0291405	0.000453675	2.2e-05	4.66e-05	0.000120763	0.00255535	0.000246981	0.00147004	0.000580265	0.000813926	0.000886956	0.000191123	0.0021615	0.00441686
S-287	0.00011458	0.00533562	0.00290892	0.000626842	0.00136463	0.000845367	0.00837873	0.00317853	0.000741886	0.00999785	0.0070815	5.1e-05	0.000118833	0.0161464	0.00107928	0.000303367	0.000188942	0.00651614	0.0007403	0.000847687	0.0110878	3.96e-05	0.000414621	0.00113524	0.00981888	0.000195245	0.00224484	4.81e-05	0.00053009	0.00016195	0.000876265	0.0155188	0.0168067	0.000118408	6.07e-05	0.0259894	0.000591459	2.47e-05	0.0012968	0.000594862	0.0103432	0.000572601	0.00224236	0.000880016	0.00122267	0.00264121	0.00243034	0.0025397	0.0113535
S-321	6.09e-05	0.000639637	0.000629242	0.00114445	0.00106287	0.000335787	0.0057672	0.00143873	0.000296017	0.0002454	0.000573014	6.36e-05	7.44e-05	0.000998058	0.000225967	0.000109255	0.000437509	0.00198437	0.000312022	5.45e-05	0	4.11e-05	0.000146163	0.000734505	0.00199578	0.000157537	0.000498558	9.43e-05	0.00138762	0.000233348	0.000838337	0.000709837	0.0182482	0.00010274	7.55e-05	0.0195084	3.65e-05	0.000893849	0	1.22e-05	0.00578716	0.00021969	0.000696693	0.000267658	0.00141346	0.000146389	2.48e-05	0.00159875	0.00385149
S-246	0.00014678	0.00311087	0.00147129	0.00676186	0.00120105	0.000666089	0.0138556	0.00331607	0.000508374	0.00416029	0.00216819	6.06e-05	6.18e-05	0.0129979	0.000333728	9.89e-05	0.000247926	0.00559882	0.000747834	0.000521822	0.00403992	4.68e-05	0.000182891	0.00378384	0.0108289	0.000347132	0.00249042	7.78e-05	0.000593074	0.000153306	0.000912472	0.00753249	0.0184502	0.000186639	0.000148324	0.0295883	0.00023514	4.6e-05	0.000102998	0.000108994	0.010658	0.000441722	0.00140436	0.000659255	0.0011287	0.000735577	0.000520455	0.00543462	0.00578625
S-244	8.55e-05	0.000398714	0.00158766	0.00348723	0.000572315	0.000869878	0.00406047	0.00147137	0.000789708	0.000916899	0	2.49e-05	6.08e-05	0.00216931	0.000265461	5.5e-05	0.000205834	0.00175947	0.000176523	7.79e-05	0.000370232	4.05e-05	0.000136438	0.000232572	0.00243713	0.000137092	0.000682713	6.55e-05	0.000618332	0.000157026	0.000323996	NA	0.018622	0.000171245	5.81e-05	0.0210395	2.85e-05	2.94e-05	0	9.16e-06	0.00265037	0.000149712	0.00056961	0.000326003	0.000718479	0.000428418	0	0.00147416	0.00237388
S-289	7.03e-05	0.000887515	0.00143986	0.000857676	0.00112942	0.000386463	0.0078725	0.00181985	0.000615387	0.000238033	0.0010431	8.57e-05	0.000133915	0.00185101	0.000248462	9.3e-05	0.000487687	0.00298205	0.000609385	0.000214025	0.00314146	6e-05	0.000119783	0.00121639	0.00453527	0.000246717	0.000990867	7.1e-05	0.000846609	0.00025689	0.000347429	0.000690219	0.02	0.000133532	0.000117697	0.0222512	1.26e-05	3.3e-05	0.00021543	0.000117952	0.00823631	0.000299556	0.00140943	0.000353261	0.00235496	0.000599339	9.46e-05	0.00165755	0.00252506
S-247	0.000123213	0.00227201	0.00234033	0.00257749	0.000664863	0.000866378	0.00446432	0.00227924	0.000761238	0.0106268	0.000691069	3.73e-05	5.72e-05	0.00992975	0.000432895	9.37e-05	0.000520053	0.00201338	0.00374022	0.000542644	0.00364218	3.94e-05	8.52e-05	0.000390288	0.00718264	0.00015091	0.000794899	4.52e-05	0.000479704	0.000121767	0.000309953	0.00619391	0.0195312	8.23e-05	5.25e-05	0.02919	0.000198984	1.89e-05	0.000670782	0.000407683	0.00393957	0.000172884	0.00199368	0.000539255	0.000637121	0.0101083	0.000451556	0.00327891	0.00650106
S-327	0.000178843	0.00310706	0.00388306	0.00596948	0.0015798	0.00185266	0.013322	0.00194236	0.000951166	0.00619123	0.00461494	2.6e-05	0.000156885	0.0123789	0.000789035	0.00028356	8.09e-05	0.0139864	0.000625507	0.000556035	0.0126833	6.67e-05	0.000529845	0.000725782	0.0117066	0.000146773	0.00506926	4.9e-05	0.0005565	0.000208376	0.00043706	0.0089373	0.0189753	0.000140384	7.31e-05	0.0284604	0.000772153	4.4e-05	0.000742198	0.000486012	0.00560384	0.000279893	0.00154955	0.00103502	0.000553327	0.0028862	0.00114985	0.00269636	0.00706408
S-025	0.00016657	0.00214684	0.00143417	0.000632458	0.00361966	0.000974692	0.00696438	0.0015562	0.000816555	0.00233049	0.0017789	5.12e-05	0.0001707	0.00528835	0.000702521	0.000112277	0.000336787	0.00171402	0.000343112	0.000255654	0.000820948	5.03e-05	4.61e-05	0.00195097	0.00416496	0.000262419	0.000690266	7.16e-05	0.000608869	0.00026791	0.00173348	NA	0.018315	0.000501073	6.62e-05	0.028972	3.19e-05	1.79e-05	8.63e-05	0.000148517	0.00266829	0.000603481	0.00593877	0.000378342	0.00269939	0.000809615	0.000527429	0.00458429	0.00597369
S-231	0.000129729	0.00217915	0.00141263	0.000815457	0.00072242	0.000659174	0.00307123	0.001668	0.000533968	0.00354437	0.00366038	5.16e-05	8.94e-05	0.00461862	0.000946551	0.000214656	0.000307381	0.00517076	0.000341967	0.000384079	0.00360309	5.6e-05	0.000265541	0.000716181	0.00848348	0.000194613	0.0020722	6.45e-05	0.000626693	0.000183812	0.000253687	0.00277898	0.0185185	0.000146652	0.000131406	0.0234922	0.000177417	3.32e-05	0.000535099	0.000332063	0.00239888	0.000211237	0.00528497	0.000178353	0.000739928	0.00184982	0.000599164	0.00778746	0.00491045
S-074	8.11e-05	0.000949677	0.00121111	0.000766965	0.00157175	0.00048723	0.00442394	0.00166056	0.000440863	0.000395874	0.00216107	5.49e-05	8.54e-05	0.00614415	0.000548619	0.00021373	0.000271515	0.00309131	0.000325333	0.000217415	0.000668766	4.9e-05	0.000247462	0.000573037	0.00347775	0.00024568	0.00104119	7.15e-05	0.000906104	0.000195912	0.000453417	0.00180877	0.0191571	6.4e-05	8.09e-05	0.0245218	8.8e-05	2.81e-05	4.56e-05	8.46e-05	0.00417198	0.000216902	0.00107841	0.000377692	0.00129493	0.000505655	4.9e-05	0.00187773	0.00333731
S-108	6.65e-05	0.00280664	0.000854936	0.00287216	0.000784458	0.000420188	0.00687745	0.00254973	0.000289512	0.000442868	0.00294292	4.32e-05	0.000140436	0.00203734	0.000482746	0.000160156	0.000259833	0.00172003	0.000406349	0.000499066	0.00110793	3.69e-05	0.000135116	0.00135032	0.00382949	0.000294432	0.000579864	6.26e-05	0.000790098	0.000187915	0.000954973	0.00330219	0.0186567	0.000175995	0.000104837	0.0217799	2.91e-05	3.46e-05	7.82e-05	9.76e-05	0.00309163	0.000221527	0.00125877	0.000194355	0.000997412	0.000481266	0.000191995	0.00300904	0.00332399
S-162	6.82e-06	0.000738519	0.00139359	0.00619965	0.000482256	0.000459467	0.00546508	0.00153072	0.000372767	0.00077561	0.000664958	2.23e-05	9.48e-05	0.00326065	0.000717745	0.000119954	0.000120961	0.00294784	0.000205142	0.000207002	0.00139755	4.71e-05	0.000219289	0.000450786	0.00634882	0.000177198	0.000807469	3.82e-05	0.000501054	0.000169369	5.34e-05	0.000174834	0.0191571	0.000113908	3.54e-05	0.0224701	9.39e-05	2.41e-05	0.000306221	0.000196616	0.00418574	0.000104464	0.000793283	0.000225528	0.000408501	0.000615426	0.000220025	0.00180632	0.00510576
S-116	5.4e-05	0.00254862	0.00233164	0.00268141	0.00102285	0.000835663	0.00847999	0.00171437	0.000827069	0.00111833	0.00364506	3.62e-05	0.000107666	0.00355928	0.0009824	0.000216325	0.000425279	0.00366924	0.00150889	0.000249935	0.00182902	6.07e-05	0.000225759	0.000836274	0.00283698	0.000279076	0.00094711	7.68e-05	0.000851704	0.000204256	0.000339421	0.00112284	0.019084	0.000219839	0.000155025	0.0199903	1.96e-05	3.2e-05	0.000488603	0.000222933	0.00935174	0.000434955	0.00126812	0.000136807	0.00232217	0.00113899	0.000513505	0.0017961	0.0042361
S-098	0.000235427	0.0018612	0.00147753	0.000510845	0.00242003	0.000839467	0.0115445	0.00144965	0.00099715	0.00213895	0.00171094	2.38e-05	0.000115496	0.00284141	0.000400177	9.5e-05	0.000119842	0.0016961	0.000672259	0.000123749	0.00260334	3.88e-05	4.51e-05	0.000385208	0.00251555	0.000194294	0.000782224	4.55e-05	0.000588193	0.000136919	0.000308342	0.00109926	0.0195695	0.000339949	8.97e-05	0.0292688	2.85e-05	2.88e-05	0	6.79e-05	0.005166	0.000182237	0.00120145	0.000616157	0.00134847	0.000368263	0.000207024	0.00151691	0.00317811
S-276	0.000372724	0.0152	0.00271261	0.00100033	0.0258157	0.00156057	0.0219663	0.00767991	0.000815761	0.00223159	0.0126618	7.74e-05	0.000379476	0.00360321	0.000554994	0.000326138	0.000184608	0.0100432	0.00154714	0.000819458	0.000722778	7.1e-05	0.000263219	0.00096295	0.003369	0.000444017	0.00370404	4.39e-05	0.000510671	0.000259787	0.000455787	0	0.0187266	0.000492376	0.000129422	0.0253635	0.000190832	3.41e-05	9.69e-05	0.000105469	0.000497431	0.000297407	0.00297051	0.0039481	0.00207165	0.000858575	0.000585472	0.00267486	0.00524862
S-147	9.54e-05	0.00122494	0.00196556	0.00279722	0.000826577	0.000873713	0.00720126	0.0029788	0.00063728	0.00101731	0.0070597	4.99e-05	9.18e-05	0.00230956	0.000708511	0.000382661	0.000433073	0.00860849	0.000424941	0.000371819	0.003878	4.89e-05	0.00049301	0.000444857	0.00519518	0.000247653	0.00237017	4.84e-05	0.000615669	0.000240763	0.000128834	0.00393591	0.0192308	0.000760692	0.000106809	0.0220186	0.000229092	1.83e-05	0.000490864	0.000236283	0.00714678	0.000229632	0.000874956	0.000405552	0.00129463	0.000996524	0.000657196	0.00196007	0.00432
S-055	7.45e-05	0.0012845	0.00060909	0.000400518	0.000347582	0.000371802	0.00332454	0.00286666	0.000332174	0.000203669	0.00091181	2.67e-05	9.09e-05	0.00181964	0.0019735	0.000102811	0.000162013	0.000467498	0.000633014	0.000525889	0.00229993	3.72e-05	3.66e-05	0.000600648	0.00369243	0.000183062	0.000139085	4.23e-05	0.000515826	0.000161903	0.000246025	0.00129393	0.019084	0.000112322	3.67e-05	0.0232627	0.000143766	3.72e-05	9.57e-05	4.84e-05	0.00406047	0.000140977	0.000844092	0.000355582	0.000741391	0.000382455	0.000569314	0.00305289	0.00270863
S-406	0.000143895	0.00162879	0.00193536	0.00273453	0.00205346	0.000842786	0.00714576	0.00192292	0.000445609	0.00198737	0.00200278	5.81e-05	0.000141287	0.00299515	0.000204166	0.000113359	0.000143895	0.00872728	0.000265078	0.000163076	0.00115951	7.89e-05	0.000153887	0.000617192	0.00878118	0.000186951	0.00392437	6.03e-05	0.000488826	0.000177883	0.000357611	0.00458703	0.0189036	0.000346095	0.00014221	0.0267224	0.000554955	2.09e-05	2.79e-05	5.68e-05	0.00367767	0.000325804	0.00150275	0.000912968	0.000700696	0.000585452	2.96e-05	0.00149581	0.00172349
S-050	0.000125169	0.00123827	0.00113567	0.000514795	0.00613862	0.000637728	0.00192908	0.00128556	0.000523821	0.00126548	0.000235556	1.6e-05	2.07e-05	0.0056897	0.000620172	9.47e-05	0.000156554	0.00139669	0.000552639	0.000277293	0.000615162	4.22e-05	4.05e-05	0.000654166	0.00362654	0.000169183	0.000560217	4.24e-05	0.00048991	0.000120904	0.000363085	NA	0.0194553	0.000104218	6.91e-05	0.0264385	4.25e-05	3.65e-05	0	6.91e-05	0.00456409	0.000145678	0.00151718	0.000201852	0.0010069	0.00053173	0.00032288	0.00340933	0.00489595
S-415	0.000161317	0.00154008	0.0011265	0.000835942	0.000759906	0.000684059	0.00307608	0.00191082	0.000491007	0.000360369	0.00236277	3.18e-05	0.000145317	0.00166441	0.000321766	0.000146374	0.00017992	0.00107967	0.000544591	9.62e-05	0.00245285	4.48e-05	0.000768095	0.000216184	0.00249817	0.000188826	0.000276937	3.68e-05	0.000502063	0.000166298	0.000109658	NA	0.0183824	0.000470857	0.000121657	0.0213828	4.98e-05	2.42e-05	1.98e-05	9.04e-05	0.00460887	0.000163594	0.00115605	0.000295691	0.000963939	0.000632023	0	0.00165883	0.00290438
S-208	0.000296368	0.0131215	0.00470604	0.0030511	0.0188751	0.00260809	0.014386	0.00417002	0.00194838	0.00723397	0.00910932	9e-05	0.000199996	0.00625798	0.000902606	0.000367856	0.000763141	0.0130769	0.000873016	0.0010604	0.000725835	7.47e-05	0.000282749	0.00429135	0.00532521	0.000367933	0.00971197	4.14e-05	0.000874713	0.000265388	0.000774947	0.0029604	0.0188679	0.000530121	0.000152505	0.0259002	0.000791883	2.5e-05	0.000162806	0.000124072	0.0017573	0.00118413	0.00422133	0.00392898	0.00254949	0.000964449	0.00131587	0.00337914	0.00703891
S-184	8.07e-05	0.00304046	0.00159766	0.00469719	0.0113026	0.000591969	0.0113975	0.00363626	0.000696926	0.00111717	0.0037867	0.000211739	0.000162052	0.0166588	0.00346997	0.000332478	0.000738947	0.00234383	0.00188488	0.000729642	0.0039115	2.99e-05	0.000113927	0.00728224	0.0102712	0.000358345	0.00080274	0.000127624	0.00100186	0.000296264	0.000977707	0.00679352	0.0196078	0.000166555	9.3e-05	0.0241382	0.000296338	2.93e-05	0.000205598	6.89e-05	0.00776843	0.00116147	0.00731395	0.000659521	0.00498489	0.000768722	0.000370441	0.00438213	0.00492575
S-012	8.49e-05	0.00424221	0.00135297	0.000578962	0.00180621	0.000946717	0.00626541	0.00134584	0.000676341	0.00626243	0.00202273	6.14e-05	6.97e-05	0.00304619	0.000361023	0.000106986	0.000401489	0.00403781	0.00136112	0.000192466	0	3.73e-05	0.000221796	0.00152848	0.00178037	0.000314226	0.00155486	8.97e-05	0.00114522	0.000214736	0.00253757	0.00418486	0.0186916	5.15e-05	0.000162662	0.0211487	0.000571102	2.64e-05	0	5.75e-05	0.00411922	0.000361945	0.00238633	0.000542608	0.00244991	0.000647557	0.000183223	0.00273688	0.0041603
S-095	0.000139115	0.00287924	0.00223192	0.000694247	0.00714521	0.000730145	0.00750738	0.00569979	0.000593467	0.00167152	0.00638146	0.000226997	0.000128152	0.0104659	0.000905803	0.000258345	0.00147677	0.00283965	0.00124426	0.000686437	0.0113534	5.43e-05	0.000235524	0.00176693	0.0117319	0.00036776	0.000818243	3.46e-05	0.000454281	0.000237996	0.000916981	0.01783	0.019802	0.000392372	0.000116042	0.0238565	0.000175837	2.49e-05	0.000739603	0.000262573	0.00362565	0.00088396	0.00517894	0.000671282	0.00141028	0.00169323	0.000958109	0.00458114	0.00770754
S-197	0.000111945	0.00321613	0.00208772	0.00050476	0.00147708	0.00178446	0.00704266	0.00249047	0.00104689	0.0115039	0.00366425	2.6e-05	4.31e-05	0.00691872	0.00105211	0.000191274	0.000234158	0.00317712	0.000701547	0.000474333	0.00284571	3.29e-05	0.00019725	0.00180925	0.00557042	0.000182646	0.00134956	5.66e-05	0.000809999	0.000195566	0.000481277	0.00605889	0.0187266	9.65e-05	0.000115143	0.028057	0.000148011	2.31e-05	0.000102097	0.000156638	0.00891183	0.000356848	0.00200827	0.000457163	0.00258844	0.000952875	0.00109453	0.00441651	0.00446831
S-143	8.29e-05	0.00065959	0.000806585	0.0066292	0.00611007	0.000346241	0.0119483	0.00240501	0.000472934	0.000399587	0.000783976	8.08e-05	6.01e-05	0.00233877	0.000279775	9.3e-05	0.00090065	0.00182149	0.000987494	0.000259927	0.000787946	5.09e-05	0.000222573	0.00162848	0.00333156	0.000397773	0.000496753	9.41e-05	0.00131113	0.00032023	0.000383255	0.0103469	0.019802	0.000127978	0.000124538	0.0200937	0.000156826	2.06e-05	6.32e-05	6.84e-05	0.00191314	0.000379789	0.00120141	0.000213234	0.00135362	0.000389039	4.06e-05	0.00115143	0.00319644
S-084	0.00010781	0.00234713	0.00157814	0.000326621	0.000418037	0.000991555	0.00486407	0.00230637	0.000816186	0.00190619	0.00138323	2.07e-05	3.23e-05	0.0062373	0.00066269	0.000102676	0.00026096	0.00072943	0.000428262	0.000540083	0.00219536	3.12e-05	9.53e-05	0.00045777	0.00622975	0.000170278	0.000219631	9.32e-05	0.000621361	0.000192452	0.000428046	0	0.0196464	0.000181408	6.85e-05	0.0234388	0.000145601	3.55e-05	5.69e-06	6.43e-05	0.00805241	0.000176591	0.00117723	0.000415794	0.0012205	0.000436545	0.000449401	0.00307769	0.00415915
S-302	7.38e-05	0	0.00130577	0.00114487	0.00507951	0.00046003	0.0102963	0.00259974	0.000736792	0.000144947	0.000526868	0.000106161	8.29e-05	0.00227836	0.000320271	0.000119471	0.000349182	0.00408943	0.00102915	1.96e-05	0.00141834	4.26e-05	0.000156039	0.00134413	0.00455014	0.000274365	0.00131225	8.22e-05	0.00129615	0.000285278	0.00201938	0.000980529	0.0178253	0.000174967	0.000105159	0.0198873	8.85e-05	0.000921384	0	0	0.00396734	0.000513892	0.00258207	0.00065668	0.00208872	1.64e-05	0	0.00217785	0.00394205
S-279	9.65e-05	0.00129869	0.00127598	0.00129705	0.000626825	0.000481838	0.00491649	0.00294417	0.000496673	0.00103464	0.00128936	1.96e-05	7.55e-05	0.00626997	0.000422956	0.000104152	0.000165405	0.0020541	0.00107001	0.000497055	0.00503299	3.86e-05	8.54e-05	0.000793033	0.00694188	0.000221801	0.000638831	8.19e-05	0.000620669	0.000221878	0.000270781	0.000759807	0.0194932	8.32e-05	5.3e-05	0.0240053	0.000385409	1.67e-05	0.00014839	8.37e-05	0.00507199	0.000262879	0.00167076	0.000347862	0.00155464	0.000700848	0.000205322	0.00363003	0.0053336
S-295	0.000153128	0.0087075	0.00227553	0.00104809	0.0027794	0.000719381	0.0112386	0.00373072	0.000703143	0.00271157	0.0121461	0.000125258	0.000194087	0.00774091	0.000917076	0.000486215	0.000355391	0.00674387	0.000861261	0.000834965	0.0149839	4.95e-05	0.000261687	0.00213952	0.0113843	0.000290094	0.0019467	6.4e-05	0.00063965	0.000226755	0.000810244	0.0122057	0.0189036	3.39e-05	9.7e-05	0.0258157	0.000899149	4.53e-05	0.00100349	0.00045063	0.00565977	0.000821274	0.00544511	0.00072487	0.00142041	0.00561931	0.00115093	0.00516438	0.0111429
S-210	9.54e-05	0.0015279	0.00138335	0.00547264	0.000540313	0.000537543	0.00590929	0.0035439	0.000600229	0.00131818	0.00330957	2.56e-05	5.29e-05	0.00484785	0.000414487	0.000128762	0.000240654	0.00206851	0.00103804	0.000522078	0.00646437	4.41e-05	0.00010478	0.000520052	0.0158526	0.000262321	0.000771126	6.37e-05	0.000567563	0.000160146	0.000332284	0.00161354	0.0194553	0.000104325	5.18e-05	0.0276227	0.000292217	3.08e-05	0.000921969	0.000446285	0.00297848	0.000163137	0.00186494	0.000471632	0.000552842	0.0078375	0.000631944	0.0046612	0.0107043
S-019	7.7e-05	0.000992495	0.00234378	0.000401566	0.000324738	0.000973022	0.00152398	0.00155488	0.000717697	0.00256539	0.000880002	1.97e-05	3.79e-06	0.0045486	0.000585006	0.000158854	0.000139508	0.00498425	0.00146548	0.000211265	0.00189461	3.15e-05	9.11e-05	0.000319838	0.00514873	0.000138699	0.00138707	8.62e-05	0.000530635	8.98e-05	0.000107891	0	0.0192308	9.23e-05	7.08e-05	0.023928	7.74e-05	2.7e-05	0.000151099	0.000134949	0.00762451	0.000151795	0.00110431	0.000247527	0.000766913	0.000828102	0.000318986	0.001743	0.00480797
S-027	5.7e-05	0.00228309	0.00272139	0.0037029	0.000844115	0.001308	0.00769107	0.00210994	0.00103423	0.00114497	0.00221713	4.55e-05	8.98e-05	0.00320105	0.000860058	0.0002211	0.000250286	0.00484453	0.000633772	0.000447472	0.00413216	5.64e-05	0.000235243	0.000791401	0.00707276	0.000233443	0.00140666	6.94e-05	0.000815701	0.0002619	0.000243643	0.000326743	0.0190114	0.0002016	0.000110657	0.0262255	8.88e-05	2.7e-05	0.000476915	0.000249557	0.00404469	0.000217386	0.00149773	0.0004404	0.0015018	0.000927258	0.000322243	0.00400012	0.00472303
S-058	5.59e-05	0.0019049	0.000744076	0.000459174	0.000540137	0.000294018	0.00311925	0.00244135	0.000270193	0.000424411	0.0057541	2.77e-05	0.000122065	0.0035116	0.000592966	0.000204395	0.000147672	0.000579955	0.0010153	0.000535662	0.00197525	5.44e-05	0.000128322	0.00056479	0.0046776	0.00018923	0.000216121	3.97e-05	0.000408127	0.000163997	0.000330148	0.00406474	0.0191571	0.000176551	4.52e-05	0.0242523	0.000169715	2.17e-05	0.000144481	0.000107315	0.00361742	0.000171054	0.00121958	0.000367315	0.000571254	0.000465721	0.000243095	0.00234137	0.00346643
S-205	0.000114493	0.00150262	0.00197287	0.000424262	0.00173397	0.00123941	0.00308598	0.00224279	0.00119021	0.00265322	0.00103082	3.77e-05	0	0.0074768	0.0171396	0.000122283	0.000466282	0.00181102	0.00478128	0.000389229	0	2.99e-05	NA	0.000597064	0.00719753	0.000179365	0.000778364	7.79e-05	0.000660566	0.000133143	0.000257173	0.000216522	0.0195312	7.49e-05	4.46e-05	0.027413	0.000196928	3.53e-05	2.79e-06	8.86e-05	0.0033364	0.000276499	0.00651695	0.00029145	0.00125343	0.000564392	0	0.00474511	0.0033635
S-293	0.000122052	0.00225085	0.00122139	0.000588696	0.00104095	0.000380423	0.00488686	0.00329346	0.000393155	0.00347918	0.00188922	4.34e-05	5.61e-05	0.0101975	0.000752055	0.000176422	8.1e-05	0.00142187	0.000724642	0.000619468	0.00968128	3.83e-05	0.000125577	0.00150971	0.0107026	0.000225193	0.00050513	6.07e-05	0.000432761	0.00015917	0.000374244	0.00337881	0.0187266	0.000153903	7.19e-05	0.0275638	0.000181731	1.9e-05	0.000459137	0.000211134	0.00791387	0.000221101	0.00504923	0.000327339	0.00116678	0.0010149	0.000852666	0.00491784	0.00808482
S-241	0.000170901	0.0169926	0.0117447	0.00274296	0.0292819	0.00234235	0.0167737	0.00235387	0.00104504	0.00781674	0.0115555	0.000258487	0.000140699	0.0197084	0.00158104	0.000511495	0.00480926	0.0289998	0.00253771	0.00104314	0.0166049	0.000160992	0.0006147	0.0249599	0.02931	0.000453981	0.0275802	6.49e-05	0.00113426	0.000231003	0.00438552	0.00295506	0.0190476	0.000722823	0.0001558	0.0290363	0.0249756	3.15e-05	0.00062294	0.000285755	0.0035576	0.000886015	0.00389465	0.00959181	0.00153923	0.00155239	0.0024884	0.00258543	0.00665029
C-310	7.79e-05	0.00120524	0.000376161	0.000760218	0.000289355	0.000470222	0.00308206	0	0.000286481	0.000274064	0.000921582	2.61e-05	1.95e-05	0.00216689	0.000145821	6.18e-05	0.000204697	0.00035847	0.000563139	0.000115658	0.00191845	2.39e-05	0.000173864	0.0002994	0.00143684	2.81e-05	0.000503845	4.7e-05	0.00225161	0.000112003	0.000818368	0.000744035	0.0188679	6.74e-05	3.46e-05	0.0124102	0.000110329	0.000305231	3.17e-05	7.65e-06	0.00205478	8.74e-05	0.000573101	0.000627037	0.00181241	0.000352136	0.000401581	0.00136583	0.0017861
C-312	3.9e-05	0.000396443	0.000297309	0.000363673	0.00273464	0.000351293	0.00252839	0	0.000194406	0.000171103	0.000977794	2.49e-05	9.31e-06	0.000953668	0.000190734	6.62e-05	8.56e-05	0.000256718	0.0020071	0.000546617	0.000799757	1.33e-05	0.000184211	0.000103061	0.000867293	2.81e-05	0.000279103	1.86e-05	0.00027923	6.66e-05	0.000205108	0.00307314	0.018622	6.72e-05	1.61e-05	0.00809009	0.00044077	3.13e-06	3.91e-05	1.61e-05	0.000233319	8.2e-05	0.000310417	0.000117435	0.00109719	0.000375704	0.000207578	0.00036152	0.000908391
C-316	4.49e-05	9.79e-05	0	0.00206839	0.000258286	0.000157419	0.00983583	0	7.48e-05	0.000262126	0.000724521	6.71e-06	9.86e-06	0.000816989	9.21e-05	4.41e-05	1.57e-05	0.000336636	0.00025649	0.00206839	0.00202789	1.91e-05	0.000187091	0.000161259	0.00200142	0	0.000443332	2.77e-05	0.00054873	8.09e-05	0.000300196	0.017786	0.0184162	0.000130649	2.64e-05	0.0188837	0.00214732	0	7.58e-05	2.64e-05	0.000240328	2.99e-05	0.000193638	0.000226929	0.000215298	0.000743667	0.000490271	0.000390205	0.000598983
C-317	2.45e-05	0.000119987	4.06e-05	0.000829649	0.000482088	0.000205848	0.00380395	0	0.000185109	0.000155408	0.000279931	1.11e-05	1.2e-05	0.000415614	0.000190716	3.91e-05	0.000166172	0.000169159	0.000856814	0.000151632	0.00138092	3.78e-05	0.000100149	0.000181445	0.0024307	0	0.000313211	1.71e-05	0.000655812	0.000100233	0.000175528	0.000377713	0.0191571	0.000106123	1.82e-05	0.0190268	0.000457544	0.000338854	1.69e-05	NA	0.00130723	5.59e-05	0.000254204	0.000366441	0.000535544	9.4e-05	0.000298783	0.000603202	0.000510126
C-320	6.55e-05	0.000445334	0.000851377	0.00118129	0.000825803	0.000610969	0.0144122	0	0.000349335	0.000339258	0.000934843	3.94e-05	8.78e-06	0.00136479	0.000172748	3.4e-05	0.000159227	0.000619409	0.00385443	0.000112089	0.0018031	1.55e-05	0.000250344	0.000338355	0.00176463	0	0.000846663	2.41e-05	0.0014993	8.42e-05	0.000341657	0.00120746	0.0187266	4.53e-05	1.22e-05	0.00599605	9.54e-05	0.000256017	2.27e-05	2.29e-05	0.00173891	0.000153723	0.000948787	0.000740869	0.00293988	0.000297115	0.000343097	0.00121993	0.00206434
C-321	1.94e-05	0.000141406	0.000429185	0.00373621	0.00109498	0.000287506	0.00928345	0	0.000195546	0.000119603	0.000818284	2.38e-05	4.83e-06	0.000252441	0.000164492	4.54e-05	0.000514624	0.000378457	0.00122277	9e-05	0.000637392	2.67e-05	0.00026895	0.000118785	0.000921979	0	0.000659114	2.31e-05	0.00147543	9.2e-05	0.000156879	0.000533643	0.0182149	0.000109561	9.77e-06	0.00579454	0.00066539	0.000256943	3.95e-05	9.61e-06	0.00153323	8.41e-05	0.00028415	0.000355289	0.00203672	0.000288407	0.000321289	0.000799974	0.00130851
C-322	1.88e-05	0.0001883	2.34e-05	0.00120218	0.000191573	0.000235594	0.00328327	0	0.000126135	8.49e-05	0.000670831	3.27e-05	5.39e-06	0.000402645	0.000114453	4.89e-05	0.000165754	0.000337574	0.000607199	5.36e-05	0.00390215	1.69e-05	8.01e-05	0.00017594	0.00281654	0	0.000637138	3.37e-05	0.00179479	8.99e-05	0.000198995	0.00102184	0.0192308	3.57e-05	2.23e-05	0.0150098	0.000325384	0.000444408	2.99e-05	1.09e-05	0.00171857	6.78e-05	0.000559679	0.000569471	0.00262669	0.000226197	0.000362547	0.00246728	0.00187315
C-324	8.61e-05	0.00089848	0.000523927	0.000524593	0.000241414	0.000305107	0.00441245	0.000288267	0.000241353	0.000849447	0.00149446	1.48e-05	1.88e-05	0.00188537	0.000339724	5.35e-05	5.16e-05	0.000168575	0.000742474	0.0006511	0.00554428	1.95e-05	0.000139076	0.000178539	0.00145515	0	0.000305228	3.21e-05	0.000268642	7.09e-05	0.000124659	0.00210404	0.0197239	9.2e-05	1.49e-05	0.0172329	0.000185596	8.78e-07	0.000122176	3.63e-05	0.00177958	5.77e-05	0.000390121	0.000209431	0.000301109	0.000750349	0.000615392	0.000851476	0.00111615
C-325	0.00010849	0.000645994	0.000354785	0.000427254	0.000516511	0.000248142	0.00667397	0.000180958	0.000168458	0.000379074	0.00133801	8.49e-06	2.86e-05	0.000866127	0.000267318	5.96e-05	6.97e-05	0.000600598	0.000441486	0.000349928	0.00400942	1.94e-05	0.00012079	0.000108972	0.000819481	0	0.000833742	3.31e-05	0.000802635	9.49e-05	0.000241807	0.00309353	0.0185874	0.000124767	5.99e-06	0.0175176	0.000169992	2.56e-06	7.53e-05	2.4e-05	0.00155141	7.67e-05	0.000455406	0.000434469	0.00210371	0.000592729	0.000636336	0.000553271	0.00114109
C-326	8.95e-05	0.0015711	0.0008665	0.000695819	0.000536803	0.000780822	0.00499532	0	0.000461791	0.000735324	0.000701895	1.21e-05	2.85e-05	0.00138689	0.000211481	7.36e-05	0.000190959	0.000185316	0.000864934	8.25e-05	0.000781848	1.29e-05	0.000122131	0.000131744	0.000777528	9.56e-06	0.0004319	3.09e-05	0.000920991	8.8e-05	0.000254631	NA	0.0179533	8.51e-05	1.87e-05	0.00879666	0.000203515	0.000309283	3.12e-05	1.73e-05	0.00115129	0.000100772	0.000450666	0.000290192	0.00130167	0.00026662	0.000250607	0.000882998	0.00101474
C-327	2.63e-05	0.000229546	0.00109191	0.00241792	0.000516656	0.000527592	0.0114529	0	0.000307898	0.000465316	0.00194544	2.04e-05	1.9e-05	0.000753683	0.000331483	9.63e-05	9.37e-05	0.000631415	0.00125763	0.000543383	0.00337634	3.25e-05	0.000239283	0.00021504	0.00107583	0	0.00110278	2.5e-05	0.000991424	9.8e-05	0.000268208	0.00375936	0.019305	0.000200392	2.42e-05	0.0139704	0.000257843	6.02e-06	0.000224035	7.45e-05	0.00113859	8.18e-05	0.000413005	0.000278487	0.00269961	0.00142739	0.00124378	0.000610684	0.00145474
S-001	0.000137173	0.00139472	0.00213163	0.000869153	0.000955304	0.0010759	0.00418577	0.000130678	0.000705949	0.00211023	0.00297097	2.19e-05	4.54e-05	0.00456643	0.000574667	0.000103523	0.000139036	0.000969334	0.00266284	0.000785962	0.0100259	3.62e-05	0.000691919	0.000456786	0.00330456	7.86e-05	0.00180741	4.75e-05	0.00275343	0.000144626	0.000320298	0.000477501	0.0187266	0.000317202	9e-05	0.0186917	0.000109798	6.91e-06	0.000172	6.76e-05	0.00221301	8.49e-05	0.0014199	0.00103345	0.00248777	0.00245034	0.00224688	0.00269605	0.00670754
S-004	0.000131056	0.00573112	0.00290821	0.00705904	0.00281968	0.00127289	0.0146823	0.000244758	0.00229512	0.000599275	0.00118153	3.86e-05	6.49e-05	0.00280758	0.000397338	8e-05	0.000204491	0.000216661	0.00160194	0.000294754	0.000220868	1.74e-05	4.56e-05	0.00209464	0.000799296	7.4e-05	0.000288256	9.11e-05	0.000873294	0.000177296	0.0051711	NA	0.0195695	0.000183231	0.000101081	0.00875139	6.9e-05	3.76e-06	6.06e-05	1.83e-05	0.000732923	0.000193222	0.00418057	0.000198368	0.00534607	0.000530836	0.000556566	0.00310234	0.0028453
S-009	0.000111394	0.0131878	0.00169664	0.00260684	0.000852285	0.000798611	0.0184942	0.000376184	0.000449957	0.0019978	0.00770699	2.88e-05	4.42e-05	0.00618204	0.00155627	0.000130524	7.29e-05	0.000568088	0.00377262	0.00136684	0.00485249	4.5e-05	0.00019695	0.00322369	0.00477753	8.01e-05	0.00113745	3.05e-05	0.00149135	9.17e-05	0.000585776	0.00173917	0.0189394	0.000178153	5.87e-05	0.0189769	0.000271776	5.6e-06	0.000292486	8.91e-05	0.00119936	0.000343054	0.00868761	0.00164768	0.00268802	0.0026199	0.00298605	0.00715141	0.0122707
S-015	9.58e-05	0.00139133	0.000919889	0.00128662	0.000994537	0.000653512	0.00393773	0.00065475	0.000370657	0.000473276	0.00256295	4.22e-05	9.8e-05	0.003385	0.000358069	0.000126806	3.44e-05	0.00114885	0.000368111	0.000154741	0.00544041	3.73e-05	0.000166304	0.000340565	0.00564766	3.71e-06	0.00175017	4.29e-05	0.000628901	0.00019523	0.000142577	0.000588624	0.0178571	0.000320621	6.35e-05	0.0239227	0.000458353	8.84e-06	0.000222493	8.5e-05	0.00153896	5.44e-05	0.000654255	0.000900617	0.000593221	0.000737213	0.000501317	0.00125066	0.00155084
S-020	0.000105073	0.00837355	0.000930711	0.00147355	0.00948806	0.000403822	0.0152809	0.0012368	0.000242774	0.000202596	0.00253871	5.05e-05	9.16e-05	0.00135201	0.000226641	9.34e-05	0.000229588	0.000172139	0.000716092	0.000477636	0.00226767	4.26e-05	0.000130953	0.00280565	0.00239346	0.000129557	0.000226666	5.81e-05	0.000443172	0.000140157	0.0060535	0.00329795	0.0175439	0.000386551	9.62e-05	0.0176578	0.000137236	3.28e-06	8.58e-05	2.83e-05	0.00192536	0.000173794	0.00317279	0.00124177	0.00284004	0.00072995	0.0020566	0.00329446	0.00473642
S-022	8.12e-05	0.00134896	0.000480311	0.00101964	0.000429265	0.000371626	0.00785196	8.14e-06	0.000459073	0.000169619	0.00091806	2.17e-05	2.34e-05	0.000864176	0.000186043	4.61e-05	9.11e-05	0.000140958	0.00116145	9.16e-05	0.00150663	3.86e-05	6.8e-05	0.00041588	0.00155991	0	0.000213558	3.87e-05	0.000704875	7.43e-05	0.00110126	0.000458643	0.0189753	0.000124936	2.43e-05	0.00896228	0.000100172	0.000336803	4.03e-05	1.33e-05	0.00573172	7.26e-05	0.000968906	0.000179221	0.00142471	0.000277731	0.00038011	0.00116931	0.00141557
S-023	4.68e-05	0.00114529	0.00122277	0.00273077	0.0186981	0.000886439	0.0163863	0.00161061	0.000472856	0.00052724	0.00242513	6.71e-05	6.19e-05	0.00171383	0.000399276	0.00013567	0.000275124	0.00144702	0.00157123	0.00372087	0.00475027	5.98e-05	0.000462692	0.00295234	0.00447255	6.5e-05	0.00167764	4.23e-05	0.00188604	0.000154065	0.00123567	0.00414373	0.0188679	0.00023002	8.37e-05	0.0189075	0.00132494	5.08e-06	0.000175332	3.96e-05	0.00090257	0.000201295	0.00242386	0.00650506	0.0024159	0.00118151	0.00183886	0.00334662	0.00776832
S-028	6.47e-05	0.000620061	0.000658822	0.00150453	0.0025039	0.000424984	0.00833505	0.00010697	0.000546146	0.000106379	0.000762245	4.57e-05	6.41e-05	0.00118989	0.000221776	5.92e-05	0.000424097	0.000353966	0.000604243	0.000375342	0.00337849	2.18e-05	0.000121783	0.000674788	0.0023095	2.84e-05	0.000483466	4.15e-05	0.00134012	0.00010425	0.0003571	0.00162289	0.0192308	5.78e-05	2.55e-05	0.00801254	0.000167581	7.98e-06	3.93e-05	1.01e-05	0.00204202	0.000167108	0.00798756	0.000701723	0.00339272	0.000589667	0.0064189	0.00417492	0.00324116
S-031	7.41e-05	0.00297031	0.000436857	0.000634315	0.000931235	0.00030143	0.0165581	0	0.00019781	0.000211897	0.00179001	3.54e-05	4.09e-05	0.000606931	0.00013446	0.000100809	0.000190664	0.000223407	0.00179206	0.000293435	0.000651214	4.21e-05	0.000206391	0.0014566	0.00133954	0.000254775	0.000383612	5.63e-05	0.00154326	0.000132615	0.00189975	0.000825096	0.0199601	0.00012544	0.000177718	0.0143604	0.000997777	1.58e-06	7.47e-05	3.58e-05	0.00190022	0.000159004	0.00374131	0.000903587	0.00370614	0.00094831	0.000723087	0.0025085	0.00266707
S-035	0.000179998	0.00578158	0.00492789	0.00161029	0.0122295	0.00207697	0.0140305	0.00019784	0.00117741	0.0094507	0.00429724	4.51e-05	4.99e-05	0.00500333	0.000309328	9.66e-05	3.17e-05	0.000742794	0.00140131	0.000712401	0.000846791	2.31e-05	6.77e-05	0.000762772	0.00140144	9e-05	0.00140236	2.72e-05	0.000501483	8.79e-05	0.000846134	0.000831183	0.018622	0.000115168	3.66e-05	0.0224341	0.000236908	0	8.47e-05	4.25e-05	0.000519424	0.000179505	0.00187976	0.00279841	0.00207852	0.00110016	0.00153238	0.00129669	0.00483105
S-037	8.54e-05	0.00164994	0.00116568	0.000690372	0.000461115	0.000490172	0.00325577	0	0.000370873	0.0196015	0.00162327	3.49e-05	6.5e-07	0.00326706	0.000584286	0.000186013	0.000639798	0.00137164	0.000676096	0.000613165	0.0036792	3.14e-05	0.000443971	0.00325089	0.00327628	0	0.00172877	9.39e-05	0.00262865	9.1e-05	0.000798232	0.00204676	0.019084	NA	3.39e-05	0.0181892	0.000631255	7.42e-06	0.000138009	4.42e-05	0.00496012	7.8e-05	0.00509246	0.0010736	0.00161961	0.00124025	0.0031443	0.00267506	0.00239322
S-042	0.000132523	0.00251257	0.00132403	0.0038918	0.00037082	0.000564942	0.0115877	0	0.000344404	0.000685162	0.00204418	3.7e-06	3.74e-05	0.00158691	0.000698467	6.04e-05	2.63e-05	0.000315678	0.00042649	0.000405363	0.00287748	2.18e-05	5.98e-05	0.000152843	0.00206122	4.68e-06	0.000746817	3.03e-05	0.000839313	9.21e-05	0.000161722	NA	0.0189036	0.000191701	3.28e-05	0.0190535	0.000154179	8.07e-07	0.000139927	6.02e-05	0.00180438	0.000103463	0.000787011	0.00081376	0.00117601	0.00113425	0.00144459	0.00223928	0.00293093
S-045	6.37e-05	0.00369691	0.00122638	0.0050221	0.00158724	0.000706092	0.0109373	0.000436301	0.000865573	0.00036154	0.00163098	4.59e-05	8.35e-05	0.00227388	0.000220213	0.000113756	0.000239914	0.000650462	0.000613719	9.33e-05	0.00178284	5.83e-05	0.000140811	0.00166056	0.00304412	0.000100052	0.000985137	5.72e-05	0.00170955	0.000206617	0.00326281	0.000691357	0.0185529	0.0002753	9.75e-05	0.0174456	0.000656134	0.00029264	5.83e-05	2.31e-05	0.0032598	9.65e-05	0.000667829	0.00240812	0.002004	0.000458227	0.000605524	0.00349233	0.00624794
S-051	6.35e-05	0.00109037	0.000668256	0.00369506	0.000298198	0.000386796	0.00467261	0.0001699	0.000244917	0.000662523	0.00119334	1.58e-05	3.11e-05	0.00113494	0.000143627	4.28e-05	2.18e-05	0.00107409	0.000441978	0.000868046	0.00474895	2.7e-05	0.000123884	0.000307733	0.00323576	0	0.00164118	NA	0.00107863	9.6e-05	0.000290289	0.000576194	0.0193424	6.74e-05	2.18e-05	0.0196479	0.000192647	6.9e-06	0.000147398	6.35e-05	0.000791649	4.87e-05	0.000649893	0.000838002	0.000854833	0.00143161	0.00112648	0.00239163	0.00311745
S-052	7.27e-05	0.00106288	0.000279563	0.00150427	0.000233717	0.000167842	0.00436135	0.000131978	0.000141082	0.000675561	0.000789395	1.52e-05	5.85e-06	0.00157138	0.000177499	5.03e-05	7.59e-05	0.000246788	0.00115681	0.00054173	0.00405395	2.05e-05	8.54e-05	0.000209103	0.00354331	0	0.000380294	2.26e-05	0.000421295	7.72e-05	0.000183774	0.000867333	0.019685	0.00011985	1.02e-05	0.0156953	0.000150836	4.39e-06	0.000172686	8.28e-05	0.00159755	4.61e-05	0.000931518	0.000335911	0.000814269	0.00139554	0.00103108	0.00110125	0.00233414
S-062	2.19e-05	0.000577222	0.000172577	0.00349562	0.000155491	0.00017235	0.00849963	0	8.86e-05	0.000168297	0.000773952	3.66e-06	6.78e-06	0.000887101	0.000132148	4.27e-05	8.52e-05	0.000105336	0.000167519	0.000521361	0.00242408	1.66e-05	2.89e-05	0.000269742	0.00285979	3.57e-07	0.00010044	2.19e-05	0.000267635	7.39e-05	0.000396281	0.000193067	0.0194175	0.000108967	1.59e-05	0.00927407	4.06e-05	0	5.49e-05	2.64e-05	0.00101763	2.64e-05	0.00117753	8.46e-05	0.000281965	0.000785397	0.000709208	0.00200031	0.00187289
S-065	8.33e-05	0.00102441	0.000587605	0.00177794	8.83e-05	0.000352602	0.00184903	0	0.000172034	0.000171484	0.000491244	6.92e-06	5.01e-06	0.000481611	0.000123934	3.6e-05	5.18e-05	0.00020785	0.0001977	0.000114043	0.00329667	1.6e-05	5.51e-05	9.37e-05	0.00164641	0	0.000290311	NA	0.000263061	5.94e-05	0.000103408	NA	0.0196464	9.36e-05	1.41e-05	0.0113962	6.04e-05	7.11e-07	3.37e-05	3.14e-05	0.00120857	3.55e-05	0.000249259	0.000136347	0.000589351	0.000644982	0.000348173	0.000795908	0.000877302
S-066	4.25e-05	0.00141018	0.000310734	0.000312172	0.00384783	0.000291495	0.015087	0.000255268	0.000163223	0.000119751	0.00279199	1.23e-05	3.52e-05	0.000613246	0.000167076	8.98e-05	9.86e-05	0.000273965	0.0032107	0.000795844	0.000973531	2.02e-05	7.36e-05	0.000307342	0.00100694	3.24e-05	0.000396782	2.7e-05	0.000481094	0.000109819	0.000975783	0.000863223	0.0181818	0.000419984	2.46e-05	0.0176354	0.000246286	1.93e-06	6.1e-05	1.76e-05	0.000504757	6.22e-05	0.00106886	0.000735467	0.00127797	0.000582637	0.000600112	0.00141134	0.0016963
S-071	0.000103408	0.000800816	0.000656665	0.00198969	0.000441388	0.0004156	0.00593691	0	0.000298368	0.0010843	0.00058645	9.52e-06	1.06e-06	0.00218035	0.000148163	3.64e-05	0.000231837	0.000215934	0.00360084	0.000234536	0.00112125	1.83e-05	6.69e-05	0.000199702	0.000912029	6.89e-06	0.000235412	2.79e-05	0.000329117	7.48e-05	0.000942449	0.00407641	0.0185185	0.000103809	2.39e-05	0.00349868	3.93e-05	2.33e-06	4.05e-05	1.81e-05	0.000427308	7.31e-05	0.000729251	0.000100927	0.00100927	0.000460501	0.000257589	0.000723196	0.00101336
S-077	8.55e-05	0.000373817	2.07e-05	0.000417429	4.76e-05	0.000146945	0.00281491	0	0.000217337	8.02e-05	0.000337227	4.44e-06	0	0.000434261	8.87e-05	2.63e-05	2.67e-05	0.00010354	0.000777408	4.12e-05	0.000751695	6.51e-06	7.06e-06	9.68e-05	0.00082398	0	0.000143296	1.64e-05	0.000328346	5.34e-05	0.000159027	NA	0.0189036	8.9e-05	8.12e-06	0.0068795	3.02e-05	0.000318777	2.2e-06	2.93e-06	0.00213699	3.13e-05	0.000210762	0.000114933	0.000542826	8.82e-05	9.01e-05	0.000247387	0.000501451
S-081	9.54e-05	0.000767849	0.000220026	0.0018899	0.000234029	0.000242895	0.00492184	0	0.000208804	0.000213155	0.000909614	1.16e-05	1.61e-05	0.00124674	0.000691878	4.63e-05	6.08e-05	0.000182629	0.000201246	0.000658408	0.00142727	1.52e-05	3.14e-05	0.000442996	0.00116547	8.44e-06	0.000248621	2.33e-05	0.000278754	7.37e-05	0.000493217	0.000136105	0.0187617	0.000112647	1.98e-05	0.0100015	3.15e-05	2.39e-06	7.16e-05	3.61e-05	0.000350634	4.53e-05	0.000571478	0.000123051	0.000993305	0.000719328	0.000315496	0.00153243	0.00105095
S-082	0.000237711	0.00233539	0.00332366	0.000797379	0.00372832	0.00181152	0.0191938	0.000554915	0.00103119	0.0013285	0.0015943	3.28e-05	1.88e-05	0.00375047	0.000427208	9.12e-05	0.000123609	0.00118155	0.000933254	0.000417531	0.00437056	3.71e-05	0.000225017	0.0002738	0.00338471	3.57e-05	0.000608508	3.08e-05	0.000659653	0.000138722	0.000263013	NA	0.0193424	0.00056297	4.28e-05	0.0192656	0.000125772	2.5e-06	0.000138551	4.66e-05	0.00663228	7.16e-05	0.00131942	0.00360597	0.00544791	0.00103028	0.00215815	0.00196516	0.00420542
S-088	0.000447694	0.0063543	0.0055761	0.00212319	0.010235	0.00270747	0.0195569	0.000553291	0.00323369	0.00164312	0.00390107	5.69e-05	0.000294037	0.0142965	0.00101588	0.000215919	0.000375344	0.0011489	0.0195473	0.00184014	0.00469379	3.01e-05	0.000100785	0.00443181	0.00718803	4.12e-05	0.00165674	9.13e-05	0.00288907	0.000257631	0.000917939	0.000195165	0.0176991	7.32e-05	3.3e-05	0.0162832	0.00134468	1.36e-06	0.000140149	5.28e-05	0.00147766	0.000883359	0.0198016	0.000984086	0.00467848	0.00184153	0.00239795	0.015238	0.00884078
S-089	0.000111719	0.00313724	0.00228118	0.00118502	0.000375902	0.00133026	0.00146146	0	0.00123361	0.00670916	0.0029077	1.96e-05	1.36e-05	0.00838194	0.000797337	0.000145798	3.65e-05	0.00129111	0.000153778	0.000353465	0.00287663	2.26e-05	0.000136598	0.000186778	0.00406179	1.63e-05	0.0011638	5e-05	0.000526207	0.00012383	0.000196494	NA	0.0179533	5.94e-05	4.36e-05	0.0225217	0.000236347	1.85e-05	0.000370504	0.000213862	0.00393857	7.97e-05	0.0012437	0.000360271	0.000760489	0.00208967	0.00117662	0.00192209	0.00577433
S-091	6.03e-05	0.0020843	0.001267	0.000307549	0.000360652	0.000748346	0.00419155	0.000186085	0.000412509	0.000938052	0.00152931	1.46e-05	2.92e-05	0.00182158	0.000274274	5.38e-05	5.25e-05	0.000114607	0.000865892	0.000617413	0.00260153	1.98e-05	6.74e-05	0.000590668	0.0014706	2e-05	5.01e-05	2.91e-05	0.000171926	8.35e-05	0.000381134	0.00167515	0.0194932	0.000169403	2e-05	0.00686379	0.00010496	2.82e-06	7.8e-05	4.83e-05	0.00132343	2.66e-05	0.0011139	0.000140966	0.00121286	0.000831073	0.000244501	0.00205462	0.00212129
S-096	4.66e-05	0.0017663	0.000417682	0.00319808	0.00101115	0.000212964	0.0163387	0.000652284	0.000151917	0.000387591	0.00291354	3.85e-05	2e-05	0.00195909	0.000261747	0.000111199	0.000111646	0.000461198	0.00156102	0.000639724	0.00798993	3.75e-05	0.000153465	0.000925937	0.00367783	8.38e-05	0.000290827	2.35e-05	0.000386638	9.98e-05	0.000329104	0.000402264	0.0199203	0.000256479	4.51e-05	0.0202612	0.000179598	2.29e-06	0.000271867	6.89e-05	0.00101844	0.000115128	0.00132972	0.000836258	0.00172681	0.00193709	0.000908198	0.00347254	0.00592256
S-097	6.29e-05	0.00186822	0.00281135	0.00556872	0.00128174	0.00181221	0.0167611	0.00028577	0.00112739	0.000830621	0.00512087	1.47e-05	3.89e-05	0.00127801	0.000561658	0.000188231	4.49e-05	0.000522264	0.00199876	0.00164577	0.00154317	3.65e-05	0.000348389	0.00243545	0.00178099	0.000103851	0.00048351	3.63e-05	0.000643588	0.000107953	0.000543866	0.00189499	0.0181488	0.000305373	5.28e-05	0.0155056	0.00206977	0	0.000154325	4.55e-05	0.000477837	6.07e-05	0.00129586	0.000223124	0.0018699	0.00202175	0.00111674	0.00468927	0.00657939
S-100	3.7e-05	0.00101852	0.00102223	0.000521517	0.00227451	0.000507694	0.00835272	9.88e-05	0.000363486	0.000241243	0.0015779	4.4e-05	3.32e-05	0.0031863	0.000322156	0.000132741	9.14e-05	0.000236534	0.00116913	0.00175829	0.00713728	4.39e-05	0.000129333	0.0027929	0.00536472	9.65e-05	0.000214235	4.92e-05	0.00058171	0.000121688	0.000705919	0.000965583	0.0188679	0.000198585	7.89e-05	0.0183327	0.000141522	1.52e-06	0.000109112	4.04e-05	0.00326087	9.3e-05	0.00360558	0.000864642	0.00235548	0.00117032	0.000811014	0.00519672	0.00630997
S-112	5.94e-05	0.00181114	0.000976994	0.00124722	0.00109602	0.000649047	0.00603112	0.000752366	0.000396096	0.000481905	0.0101766	5.25e-05	0.000128097	0.00209299	0.000424479	0.000326536	8.06e-05	0.000682415	0.000620604	0.0010473	0.0109692	5.16e-05	0.000238204	0.000548041	0.00500178	0.000135546	0.000642529	3.75e-05	0.000492927	0.000206698	0.000390509	0.00100306	0.0195695	0.000165671	6.05e-05	0.0204919	0.000236913	7.45e-06	0.00020886	6.63e-05	0.00502046	0.000100766	0.00302385	0.000549512	0.00135125	0.00106434	0.00131602	0.00327968	0.00433834
S-119	0.00021326	0.00784693	0.00115046	0.00081542	0.00298819	0.000517496	0.0142618	0.00112427	0.000360856	0.000417768	0.00421574	3.24e-05	0.000187564	0.00200159	0.000325821	0.000127597	7.94e-05	0.000914003	0.000881435	0.000515323	0.00116282	3.69e-05	0.000193525	0.00496455	0.00337439	0.000226563	0.00100818	5.56e-05	0.00111907	0.000242479	0.00211198	0.00308645	0.019685	0.000372074	0.000140519	0.0200614	0.000230703	3e-06	0.000174701	4.4e-05	0.00217441	0.000335248	0.00135879	0.00151801	0.00228416	0.000847341	0.000965394	0.00357194	0.00450262
S-122	0.000186166	0.0033101	0.00127838	0.000561385	0.00121042	0.000660876	0.0117393	0.000280812	0.000996452	0.00111681	0.00378166	4.02e-05	0.000123272	0.00399844	0.00057873	0.000117923	0.000408029	9.41e-05	0.003118	0.000273185	0.000867036	3.7e-05	0.000317462	0.00119904	0.00245628	0.000155394	7.44e-05	8.87e-05	0.000889069	0.000210715	0.00150887	0.000943621	0.0178571	0.000113156	0.000163286	0.00821064	0.000140432	3.92e-06	0.000110985	3.37e-05	0.00314639	0.000188417	0.00190091	6.11e-05	0.00352654	0.000935862	0.000705127	0.00271215	0.00286823
S-123	7.09e-05	0.000580915	0.000428779	0.000712397	0.000215924	0.000248398	0.00434485	0	0.000153724	0.000178658	0.000989176	8.7e-06	2.04e-05	0.00243575	0.000260057	3.56e-05	4.31e-06	0.000441166	0.000459233	0.000322742	0.00351322	3.02e-05	0.000194464	0.000587943	0.00241252	2.18e-06	0.000252329	2.88e-05	0.000618989	5.85e-05	0.000274786	0.000393613	0.0182149	5.47e-05	2.89e-05	0.0183225	0.00018749	3.55e-06	8.6e-05	2.78e-05	0.000228984	2.15e-05	0.000801444	0.000152647	0.000503124	0.00110674	0.000346411	0.00136838	0.00110477
S-130	8.13e-05	0.00378816	0.00129487	0.00156983	0.0159862	0.000730511	0.0153527	0.00032275	0.000326478	0.000366867	0.00242608	3.17e-05	5.44e-05	0.00174739	0.000494874	9.84e-05	0.000332392	0.00268921	0.00418006	0.00140928	0.00846009	9.63e-05	0.000148832	0.00438444	0.00863933	0.000179047	0.00207757	3.87e-05	0.00168279	0.000204105	0.00617222	0.00454252	0.0189394	0.000348004	9.35e-05	0.0191818	0.000242028	6.19e-06	0.000109592	3.28e-05	0.00164209	0.000142217	0.00147436	0.00232868	0.00189678	0.000774068	0.000718347	0.00440995	0.00639026
S-138	0.000123039	0.0013441	0.00170271	0.000812295	0.0212743	0.000611764	0.00625372	0.00274551	0.000440682	0.000360538	0.00337191	0.00017495	8.96e-05	0.00363917	0.000257028	0.000186618	0.000652039	0.00105847	0.0022114	0.000778572	0.00415294	5.88e-05	0.000223617	0.00223907	0.00515351	0.000263985	0.000768121	0.000101545	0.00100908	0.000283452	0.000864674	0.00205994	0.0185874	0.000338451	0.000132149	0.0213624	0.000141507	1.86e-05	0.000231478	6.48e-05	0.00211385	0.00031496	0.00992773	0.00128427	0.00381446	0.000971335	0.000629702	0.00432459	0.00874317
S-140	0.000145654	0.00273304	0.00215268	0.000870111	0.00984169	0.000965222	0.00749752	0.000993827	0.000941639	0.000538624	0.00146398	0.000104578	0.000107234	0.00848641	0.000474024	0.000123832	0.000933672	0.000549246	0.000329669	0.000597162	0.00286163	2.95e-05	0.000125852	0.0018984	0.00488719	0.000161414	0.000672067	0.000111824	0.0012098	0.000346901	0.000606139	NA	0.0181488	0.000112401	8.29e-05	0.0191792	0.000168342	1.39e-05	0.000119617	4.43e-05	0.00364752	0.0004156	0.0106463	0.000671403	0.00449869	0.000778926	0.000752428	0.00629875	0.00691219
S-144	5.24e-05	0.00113469	0.000690599	0.00113847	0.000713782	0.000522091	0.0111352	0.000154303	0.000469804	0.000216931	0.00153583	2.01e-05	8.43e-05	0.000671307	0.000233248	0.000116666	9.23e-05	0.000358281	0.000481757	0.000450346	0.00132066	3.52e-05	0.000282283	0.000678118	0.00193712	0.000110828	0.000322394	8.56e-05	0.000886098	0.000223074	0.00079912	0.000453459	0.018797	0.000245868	8.13e-05	0.015055	0.000327398	8.42e-06	8.67e-05	2.32e-05	0.00153722	5.76e-05	0.000494488	0.000170871	0.00129213	0.00111629	0.00030794	0.000653878	0.0010719
S-148	0.000210259	0.0015003	0.00100571	0.00500514	0.000728021	0.000435437	0.0124793	0.00085099	0.000318999	0.00104152	0.00101461	1.94e-05	2.28e-05	0.00890706	0.000320459	6.58e-05	4.99e-05	0.00117408	0.00185333	0.000687297	0.00877679	3.57e-05	0.000124722	0.000228258	0.00834106	4.47e-05	0.000901405	4.66e-05	0.000979774	0.000118802	0.000218781	0.000669881	0.0180832	0.000270098	5.37e-05	0.0181611	0.000294867	5.15e-06	0.000190932	6.85e-05	0.000953969	3.51e-05	0.00307509	0.00168536	0.00128393	0.00124326	0.00081239	0.00293521	0.00488602
S-155	0.000138455	0.00232794	0.00199117	0.00094699	0.0147265	0.00146489	0.00644567	0.000898382	0.00123516	0.00278998	0.00198804	0.000107317	0.000101702	0.00436605	0.00047452	0.000230174	0.000510678	0.00094283	0.000235938	0.00192093	0.00777359	6.6e-05	0.000206108	0.00534578	0.00740095	0.000232729	0.000656205	0.000147487	0.00150999	0.00024907	0.000533289	0.000934125	0.0193798	0.000164482	8.15e-05	0.0201472	0.0006032	7.93e-06	0.000139316	4.44e-05	0.0043741	0.000164066	0.00136479	0.00266009	0.00286661	0.000655254	0.00118379	0.00392478	0.00778131
S-165	0.000114018	0.00179431	0.00174184	0.00117103	0.0148155	0.0011702	0.00344083	0.000636676	0.0006232	0.00264134	0.00112655	1.34e-05	1.22e-05	0.00531952	0.000258168	6.1e-05	2.48e-05	0.000309537	0.00126533	0.00146077	0.0019572	1.37e-05	3.76e-05	0.00113708	0.00189716	6.81e-06	0.000314912	2.92e-05	0.000236667	0.000104214	0.000488211	NA	0.0180505	9.91e-05	2.43e-05	0.0250472	0.000220806	6.7e-06	0.000127002	7.73e-05	0.000320969	6.15e-05	0.000478747	0.000402546	0.000970781	0.001106	0.000692474	0.00245184	0.0031757
S-183	0.000146568	0.00256716	0.0018412	0.00564254	0.000150656	0.000723674	0.00522444	0.000725986	0.000484113	0.00265446	0.000740113	4.34e-06	1.46e-05	0.00594905	0.000273059	5.43e-05	3.69e-05	0.000193741	0.00104769	0.00105316	0.00491419	2.92e-05	6.29e-05	0.00049824	0.00477002	4.15e-05	0.000180771	3.28e-05	0.000466518	0.000113831	0.000330947	0.00123119	0.0190476	0.000141661	5.35e-05	0.0187609	0.000220838	2.14e-06	0.000200565	8.02e-05	0.00096363	4.87e-05	0.000932021	0.000475598	0.00105569	0.00141921	0.00119913	0.00491464	0.006815
S-193	0.000103137	0.00305736	0.00122023	0.000617912	0.000315936	0.000855535	0.00464345	0.000886164	0.000502778	0.00163552	0.00193495	1.15e-05	5.53e-05	0.00390465	0.000403759	0.000107395	5e-05	0.000607104	0.000240055	0.00078123	0.00487107	4.56e-05	6.62e-05	0.000883565	0.00914119	5.92e-05	0.000301479	4.2e-05	0.000530504	0.000121963	0.000805666	0.000756378	0.0183486	0.000120857	5.38e-05	0.0185883	0.00013548	3.32e-06	0.000286164	8.95e-05	0.00332019	5.08e-05	0.00134759	0.000376862	0.00109377	0.00104511	0.00163726	0.00386897	0.00890214
S-202	0.000586836	0.00527894	0.00221261	0.00105814	0.00329659	0.00143766	0.0122033	0.00219214	0.00108421	0.00204144	0.00246781	4.81e-05	7.59e-05	0.00968749	0.000717035	0.00018399	0.000169863	0.00533864	0.000357343	0.00064764	0.0158686	5.7e-05	0.000176004	0.00160595	0.0128271	0.000127548	0.00150377	5.82e-05	0.000791899	0.000225365	0.000450362	0.00128025	0.0195312	0.000217178	8.31e-05	0.0229371	0.000367846	2.24e-05	0.00019597	6.36e-05	0.0062405	0.000114058	0.00426798	0.0031676	0.00212862	0.000594319	0.000948608	0.00550964	0.00624164
S-204	0.000151087	0.00515598	0.000969867	0.0010277	0.01995	0.000580131	0.0127081	0.00179068	0.000432432	0.00065572	0.00520139	9.58e-05	0.000194281	0.00381002	0.000800933	0.000216239	0.000210953	0.000840376	0.00223391	0.00201808	0.00343981	5.58e-05	0.000144897	0.00323296	0.00426803	0.000224643	0.000559257	8.6e-05	0.000634303	0.000346362	0.00170348	0.00526866	0.018622	0.000209823	0.00014675	0.0269504	0.000198121	9.76e-06	0.000181585	3.9e-05	0.00120418	0.000285773	0.0018618	0.0015645	0.00133778	0.000504497	0.00086613	0.00288656	0.0045871
S-213	5.33e-05	0.00411714	0.00222327	0.00237105	0.000343901	0.000931665	0.00554149	0.0011607	0.00105568	0.00216529	0.00198506	2.26e-05	6.64e-05	0.00550195	0.000588007	0.000123679	9.07e-05	0.0021071	0.000160935	0.00024754	0.0187738	4.98e-05	0.00013316	0.000793156	0.0124523	4.32e-05	0.00178265	5.73e-05	0.00206845	0.000186461	0.00063757	0.000614232	0.019305	9.86e-05	4.99e-05	0.0207884	0.000571263	0.000733019	0.000350343	0.000112132	0.00567969	0.000128511	0.00201187	0.000935129	0.00135381	0.00567356	0.00134306	0.00895151	0.0130169
S-215	4.98e-05	0.000663331	0.00831928	0.00415603	0.000653237	0.00164572	0.0082036	0.00175811	0.00166933	0.00706033	0.00683951	6.54e-05	0.000250845	0.00860954	0.00121621	0.000434703	0.000257054	0.00308803	0.000754225	0.000312047	0.0285169	8.05e-05	0.000340176	0.00236104	0.0259162	9e-05	0.00290121	0.000290928	0.00286717	0.000443615	0.00109854	0.00280255	0.0182482	7.64e-05	7.61e-05	0.0289168	0.00068407	0.00203667	0.000844908	0.000238512	0.0104556	0.000602214	0.00393762	0.00147344	0.00109495	0.00239636	0.0031611	0.00784733	0.0215086
S-216	2.67e-05	0.0279534	0.0207671	0.0023461	0.0193302	0.0270007	0.0287278	0.00220798	0.0146275	0.0222955	0.0150478	0.000793425	0.0109918	0.0164269	0.00311801	0.00157162	0.000964412	0.000411963	0.00267158	0.00287636	0.00356056	0.000193557	0.000371463	0.0289145	0.00360283	0.000926696	0.00034826	0.0143522	0.00356157	0.0157983	0.0113793	0.00906674	0.0178891	0.000147952	0.000474908	0.0278845	0.00159714	4.48e-05	0.00162959	0.000630834	0.00248233	0.0125455	0.0109565	0.000472629	NA	0.00120311	0.000801905	0.0269813	0.00652906
S-243	0.000401542	0.0118167	0	0.00186986	0.00283832	0.0016441	0.00760746	0.00328836	0.001248	0.0292798	0.00761746	9.54e-05	7.01e-05	0.0313674	0.00186458	0.000586088	0.000427276	0.0104485	0.000444654	0.000738288	0.0171283	8.01e-05	0.000495866	0.00455425	0.0250721	0.000103243	0.0106599	0.0001035	0.000871007	0.000446961	0.000592855	0.0049159	0.0196078	0.000336643	0.000137538	0.0350827	0.00402388	6.26e-05	0.00119848	0.00047613	0.00915688	0.000323571	0.00373224	0.0068419	0.00144454	0.00179646	0.00162611	0.00426476	0.0177164
S-249	5.09e-05	0.00154893	0.000578202	0.00463386	0.000486059	0.000766164	0.0069587	0.000531236	0.000432781	0.00523184	0.00227672	2.02e-05	4.71e-05	0.00469127	0.000570747	0.000181502	0.000149992	0.00179832	0.00133587	5.56e-05	0.00258615	4.57e-05	0.000193479	0.000553551	0.00645763	3.46e-05	0.00133383	6.42e-05	0.00160439	0.000308533	0.000582923	0.00106158	0.0182815	0.000202823	4.35e-05	0.0219898	0.000206501	0.00136847	0.000194324	5.12e-05	0.00733586	0.000191491	0.00119994	0.000494707	0.000644898	0.000408777	0.000589781	0.00197739	0.00392023
S-251	0.000125537	0.00760223	0.00268267	0.00605653	0.00124682	0.00168294	0.00598403	0.00030899	0.00119745	0.00390135	0.00262232	5.14e-05	5.63e-05	0.00536813	0.000932377	0.000154783	0.000440509	0.00115952	0.00282797	0.000422474	0.00100345	4.55e-05	0.000175831	0.00168046	0.00326511	0.000160234	0.000698097	0.000121549	0.00108468	0.000251163	0.00186427	0.00235848	0.0191939	0.000101298	0.000135552	0.0103073	0.00035153	3.48e-05	0.000293215	8.35e-05	0.0077119	0.000347409	0.00479832	0.000380953	0.00156077	0.000887488	0.000887089	0.00477173	0.00587214
S-252	0.000207235	0.000675541	0.00155523	0.00145361	0.00238207	0.000984752	0.015387	0.000470798	0.00112391	0.00041091	0.00616282	8.42e-05	9.78e-05	0.00331501	0.000603232	0.000248769	0.000217045	0.0015809	0.00244097	0.000339748	0.00162204	2.75e-05	0.000406044	0.000584324	0.00433579	0.000159411	0.00124733	5.83e-05	0.000725105	0.000244101	0.00112039	0.011049	0.0181488	0.000197029	0.000172821	0.0135452	0.000693025	1.83e-05	0.000166017	5e-05	0.00606705	0.000457586	0.00611001	0.000367082	0.00271526	0.00062483	0.000971026	0.00463421	0.00694437
C-016	2.86e-05	0.000254759	0.000292882	0.00191302	0.000172829	0.000272618	0.00306906	0	0.000523447	6.78e-05	0.00041946	1.86e-05	6.03e-06	0.000814192	0.000150734	3.25e-05	0.000102613	0.000756455	0.000406027	1.46e-05	0.000556036	2.85e-05	4.74e-05	0.000229306	0.00235477	8.4e-06	0.000503985	5.01e-05	0.000775192	0.000123296	0.000148559	0.000997209	0.019685	9.36e-05	2.9e-05	0.00993481	0.000150314	0.000534781	2.44e-05	1.26e-06	0.00448893	8.56e-05	0.000405531	0.000137874	0.000390305	0.000153138	0.000106887	0.00109582	0.00127223
C-377	0.000172864	0.0173482	0.00424629	0.00409991	0.0273817	0.00132513	0.0202126	0.0037345	0.000647669	0.0020726	0.0158985	0.000134502	0.000175146	0.00742871	0.00184303	0.000713327	9.05e-05	0.029388	0.00137245	0.0014527	0.020253	6.32e-05	0.000943582	0.00381652	0.0291922	0.000214067	0.0290554	4.01e-05	0.00112075	0.000291565	0.000620975	0.0125324	0.0193424	0.000246315	0.000154006	0.0294895	0.0285134	3.27e-05	0.00276164	0.0007479	0.00445308	0.000335265	0.00783682	0.00616441	0.0016588	0.00250448	0.00258133	0.00444706	0.0111181
C-288	8.86e-05	0.00137208	0.000933148	0.00574344	0.000382463	0.000932836	0.00397477	0.000342968	0.000616002	0.00170144	0.00207852	2.76e-05	6.79e-05	0.00100447	0.000458678	0.000119841	0.000163744	0.00242337	0.000516013	5.73e-05	0.00297367	3.26e-05	0.00016371	0.000251343	0.00314425	2.36e-05	0.0015941	2.69e-05	0.00100888	0.000224723	0.000116509	0.00202834	0.0192678	0.000154131	3.03e-05	0.0172457	0.000264323	0.000727652	0.000174121	4.5e-05	0.00389703	9.46e-05	0.000439035	0.000393083	0.00071842	0.000349284	0.00053996	0.00189437	0.00248077
C-076	0.000113447	0.00517235	0.00156341	0.00240332	0.00472764	0.00140829	0.00962996	0.000618662	0.000917148	0.00111501	0.00249452	4.78e-05	0.000117252	0.00375406	0.000727309	0.000124043	0.000146404	0.0029186	0.00058471	0.00161516	0.00263484	3.53e-05	0.000212611	0.00461756	0.00283492	8.04e-05	0.00264728	5.46e-05	0.00111899	0.000174444	0.00109291	0.00139795	0.0180505	0.000240826	6.22e-05	0.0198221	0.000473487	1.16e-05	0.000240563	7.67e-05	0.00111837	0.000166161	0.000791877	0.00136611	0.00120586	0.00107538	0.000811311	0.00321323	0.00360771
C-267	0.000145814	0.00165784	0.000800088	0.00345255	0.00101045	0.000376347	0.00926605	0.000586575	0.000338671	0.000839512	0.00238691	3.27e-05	2.59e-05	0.0040601	0.000260381	7.24e-05	0.000551974	0.000820254	0.00232952	0.000842762	0.00519036	3.28e-05	0.000183106	0.000538902	0.00440572	6.87e-05	0.000613801	3.1e-05	0.000511886	0.000153153	0.000571965	0.00998208	0.0187617	0.000160283	4.82e-05	0.0184831	0.000428913	5.07e-06	0.000176186	6.14e-05	0.00180114	0.000111807	0.00626848	0.000610691	0.00228468	0.000928461	0.000716661	0.00475544	0.00671057
C-171	0.000384515	0.0146492	0.003533	0.00525915	0.0072242	0.00169471	0.0193449	0.00395253	0.00129281	0.00660629	0.0118725	9.94e-05	0.000124736	0.00949821	0.000616596	0.000258684	0.000142579	0.00401633	0.00216683	0.000628448	0.00301505	4.02e-05	0.000470957	0.00240828	0.00441888	0.000183481	0.00223343	3.59e-05	0.000842976	0.000219907	0.00165919	0.00663833	0.0188679	0.000289763	0.00010261	0.0220293	0.00190303	9.95e-06	0.000293177	8.95e-05	0.000695695	0.00048764	0.00623562	0.00225433	0.00269863	0.00117052	0.000946263	0.00396428	0.00721705
C-177	6.67e-05	0.00689045	0.0238698	0.00536843	0.0076271	0.0239035	0.0234842	0.00126392	0.0217182	0.0236916	0.0181531	0.000115073	0.000253944	0.0242218	0.00762603	0.000839697	0.000960889	0.00221908	0.00125069	0.0110563	0.0125726	7.83e-05	0.000767025	0.0238645	0.0136138	0.000159075	0.00379834	0.000150431	0.00144804	0.00033526	0.000483699	0.0116172	0.019685	0.000187034	4.36e-05	0.0238568	0.0181772	1.8e-05	0.00273544	0.000632458	0.00327744	0.000315589	0.00700489	0.000412877	0.00139731	0.0124865	0.0124578	0.0243423	0.0237876
C-209	7.44e-05	0.00202774	0.000841493	0.0030289	0.00303728	0.000693005	0.0172528	0.000447122	0.00067317	0.000891419	0.00243025	3.24e-05	9.75e-05	0.00121812	0.000183123	9.57e-05	0.000321294	0.000442731	0.00213926	0.000105931	0.000496434	2.91e-05	0.000187299	0.000561927	0.00103589	6.17e-05	0.000361394	8.11e-05	0.00111222	0.00017953	0.00123402	0.00202783	0.0184502	0.000240909	4.56e-05	0.0102153	0.000335787	0.000384761	3.74e-05	1.71e-05	0.00236411	0.000421115	0.00446173	0.00076771	0.00623306	0.000346871	0.000382366	0.00341937	0.0032009
C-212	9.85e-05	0.000910733	0.000740474	0.002947	0.000900402	0.000624452	0.00587643	0	0.000504139	0.00184097	0.00210802	9.77e-06	1.86e-05	0.00250222	0.000409136	9.12e-05	0.000147491	0.00382622	0.00217049	0.000635578	0.0018728	2.19e-05	0.000278691	0.000322835	0.00216627	4.26e-05	0.002028	2.52e-05	0.000900958	9.75e-05	0.000287194	0.00378224	0.0194553	8.59e-05	2.35e-05	0.0156617	0.000741388	1.07e-05	0.000255685	6.01e-05	0.00170671	0.000171252	0.000307657	0.000448353	0.000946612	0.0011905	0.0009902	0.00137426	0.00241512
C-107	0	0.000514199	0.000650991	0.00107167	0.000301055	0.00034239	0.0036069	0	0.000272879	0.000575049	0.00136034	1.79e-05	1.56e-05	0.00105301	0.000156903	7.21e-05	5.09e-05	0.00115924	0.00109211	0.000667533	0.00212489	1.41e-05	0.000136161	0.000403835	0.00120344	4.76e-06	0.000427997	2.15e-05	0.000490706	8.99e-05	0.000263289	0.00483722	0.0182149	5.84e-05	8.44e-06	0.00933498	0.000444279	4.68e-06	0.000133744	2.88e-05	0.000523752	6.68e-05	0.00025604	0.000333023	0.00148193	0.000705039	0.000529588	0.0030917	0.00286896
C-075	2.79e-05	0.000463853	0.000514801	0.000509038	0.00099949	0.000275259	0.00632473	6.03e-05	0.000206262	0.000415248	0.00303007	1.69e-05	2.36e-05	0.00109581	0.000159937	6.99e-05	7.38e-05	0.000355307	0.00324599	0.000470249	0.0033836	2.26e-05	0.000163262	0.000739651	0.0013054	4.62e-05	0.000175991	1.89e-05	0.000308475	0.000132136	0.000333269	0.00659926	0.0199203	0.000242107	2.71e-05	0.0135052	0.000260155	2.09e-06	0.000197935	3.74e-05	0.00100931	0.000200405	0.00127009	0.000320603	0.00228516	0.00105924	0.000737878	0.00190557	0.00231616
C-360	2.2e-05	0.000182711	0	0.00490344	0.000379421	0.000165755	0.00415814	0	0.00019827	7.69e-05	0.000486644	5.46e-06	0	0.00106336	0.000136619	2.38e-05	0.000114141	0.000705507	0.00107362	0.000358503	0.00158681	1.65e-05	0.000201648	0.000661169	0.000907934	5.52e-07	0.000254268	2.98e-05	0.000520523	9.91e-05	0.000172511	NA	0.019084	0.000117032	6.79e-06	0.00594614	0.000172999	1.92e-06	3.47e-05	8.12e-06	0.000917777	4.1e-05	0.000374549	0.000123464	0.00146653	0.000528448	0.000226074	0.00164303	0.00125361
C-218	1.24e-05	0.000129161	4.31e-05	0.000356374	0.000507468	0.000271565	0.0101492	0	0.000256132	8.1e-05	0.00015158	9.42e-06	2.56e-05	0.000488073	7.91e-05	3.89e-05	0.000108654	0.000277856	0.00173672	9.5e-05	0.00155421	1.46e-05	5.97e-05	0.000155542	0.000641808	0	0.000105838	5e-05	0.00072474	0.000141917	0.000128779	0.000489046	0.0190114	0.000295339	5.11e-06	0.004463	0.000185643	0.00015662	2.23e-05	1.06e-05	0.000535378	0.000151893	0.00152908	0.00072839	0.00463805	0.000343375	0.00022909	0.00172598	0.0013491
C-021	0	0.000443415	0.000334692	0.00252932	0.000152178	0.000228334	0.00857543	0	0.000175588	0.00375414	0.00102755	4.63e-06	2.46e-06	0.00131549	0.000256072	0.000101297	3.03e-05	0.000208554	0.000232929	0.000450375	0.00230602	2e-05	8.55e-05	0.000410415	0.00195414	0	0.000106092	1.99e-05	0.000192204	5.63e-05	0.000340986	0.000515608	0.0187266	6.7e-05	8.32e-06	0.0213548	0.000202527	5.66e-07	0.000267627	5.68e-05	0.000227202	3.13e-05	0.000356936	0.000142089	0.000221907	0.00126405	0.001345	0.00141836	0.00174116
C-182	3.73e-05	0.000518048	0.000835791	0.000655392	0.0010703	0.000567773	0.00490807	0	0.000463862	0.000613186	0.000722148	1.87e-05	1.15e-05	0.00294971	0.000573782	3.65e-05	6.56e-05	0.000756908	0.000778067	0.000296954	0.0012388	6.52e-06	6.03e-05	0.000234732	0.00101343	0	0.000278597	2.51e-05	0.000613481	9.52e-05	0.000143169	NA	0.0197628	7.03e-05	1.82e-05	0.00616979	0.000161231	5.42e-06	4.12e-05	1.42e-05	0.00113039	8.93e-05	0.00776087	0.000514841	0.00313895	0.000683075	0.000300861	0.00556726	0.00178615
C-330	3.35e-06	0.000315254	0.000179628	0.00690379	0.000180352	0.00017568	0.00766564	0	0.000144999	0.00156343	0.000638675	2.44e-06	0	0.000657934	0.000250214	4.59e-05	1.88e-05	0.00050296	0.00193233	0.000336954	0.00101894	1.06e-05	0.000111514	0.000219291	0.000794132	0	0.000173691	2.41e-05	0.000300004	7.22e-05	0.000527824	0.00594242	0.0189753	4.4e-05	3.1e-05	0.00996272	0.000107717	0	0.000252263	5.23e-05	0.000332704	3.16e-05	0.000427763	0.000146626	0.000353139	0.00121858	0.000715922	0.00123027	0.00113693
C-064	6.11e-06	0.000114364	0	0.00494114	0.000162789	0.000189525	0.00469467	0	0.000133419	7.52e-05	0.00080646	2.28e-05	8.03e-06	0.000166613	0.000185958	4.34e-05	0.000107005	0.000926897	0.000944892	0.00020421	0.00285347	3.03e-05	0.000425868	0.00015331	0.000802154	0	0.000268991	1.72e-05	0.000273618	8.83e-05	0.000151318	0.00295216	0.0192308	0.000185797	2.3e-05	0.00643195	0.000148426	1.35e-06	4.31e-05	1.52e-05	0.000496594	3.26e-05	0.000210187	0.000192674	0.00077664	0.000617995	0.000178471	0.000550161	0.000774615
C-243	3.71e-05	0.00061984	0.000215243	0.00213936	0.000155744	0.000149559	0.00354057	3.7e-05	0.000141695	0.00105251	0.00125392	3.72e-06	2.77e-06	0.001193	0.000144241	4.65e-05	1.67e-05	0.00031076	0.00106454	0.000586285	0.00325092	3.36e-05	8.42e-05	0.000480636	0.00204608	1.1e-05	0.000164839	2.03e-05	0.000287671	7.95e-05	0.000769651	0.0134833	0.018018	0.000176845	4.24e-05	0.0190544	0.000323885	4.93e-06	0.000114044	2.44e-05	0.000619113	3.59e-05	0.00065278	0.000751936	0.000673462	0.000789773	0.00059135	0.00168631	0.00442875
S-343	0.000136602	0.00184065	0.00196713	0.00756165	0.00257042	0.000612738	0.0137128	0.00143299	0.000552384	0.00195394	0.00636384	5.98e-05	0.000105106	0.00475185	0.000511722	0.000153424	0.000263779	0.00119523	0.00462766	0.000862712	0.00822828	5.34e-05	0.000255252	0.000821238	0.00469544	0.00011079	0.000488027	2.8e-05	0.000639914	0.000124131	0.000567291	0.00859487	0.0190476	0.000124363	7.01e-05	0.0198577	0.000325815	1.6e-06	0.000690436	0.000156411	0.00215864	0.00014829	0.00279292	0.00137873	0.00179309	0.0121769	0.000834928	0.00486441	0.0100209
S-245	6.86e-05	0.00637234	0.00438261	0.00116033	0.0105191	0.00109836	0.0199643	0.0020613	0.00130626	0.00140827	0.00532655	0.000162671	0.000199414	0.00361755	0.000594914	0.000227608	0.00182142	0.00244662	0.000713956	0.000160125	0.00630352	8.72e-05	0.00037318	0.00785325	0.00537958	0.000300443	0.00123368	0.000137218	0.0029714	0.000296135	0.00123829	0.000855872	0.019802	0.000249145	0.000254595	0.0208121	0.000533794	0.000727792	0.000185774	5.42e-05	0.017312	0.000641023	0.0188178	0.000798603	0.00718211	0.000454988	0.000544498	0.00818189	0.0085751
S-170	0.000326973	0.0144157	0.00251284	0.00311885	0.0021323	0.0010183	0.0151039	0.00186213	0.000856412	0.00390595	0.0075672	8.57e-05	0.000137995	0.0183487	0.000834509	0.000278583	0.000560247	0.00163949	0.000700684	0.000921183	0.0194203	7.5e-05	0.00038517	0.00351296	0.019927	0.000191683	0.000872605	5.59e-05	0.000720634	0.000198558	0.000760345	NA	0.0189394	0.000128377	0.000133562	0.0256961	0.000238007	2.61e-05	0.000643878	0.000339634	0.0146989	0.000443516	0.00492665	0.00138627	0.00186979	0.00218625	0.00170629	0.00797469	0.0144002
S-248	0.000202478	0.00238078	0.00269086	0.00717443	0.00662916	0.00131124	0.010605	0.00135901	0.000979678	0.00175111	0.00429016	7.67e-05	0.00010901	0.00642532	0.000655071	0.000239812	0.000905934	0.0050623	0.00175961	0.000723224	0.00198538	4.61e-05	0.000539897	0.00103247	0.00306002	0.000164263	0.00291394	8.03e-05	0.000631825	0.000370615	0.000405132	0.00490777	0.0181159	0.00027882	0.000122702	0.0267523	0.00147868	3e-05	0.000261517	4.03e-05	0.00201848	0.00460354	0.00103881	0.00105624	0.00306944	0.000621346	0.00046175	0.00143386	0.00467425
S-237	0.0001669	0.00250282	0.00252739	0.00145571	0.000619931	0.00100292	0.00428061	0.00136362	0.000785898	0.00478311	0.00167944	2.86e-05	5e-05	0.00703315	0.000490158	0.000131986	5.61e-05	0.0043064	0.000662624	0.000540318	0.0101184	4.66e-05	0.00021305	0.000483244	0.0101908	8.03e-05	0.0016317	5.15e-05	0.000669054	0.000173434	0.000298886	NA	0.019084	9.93e-05	5.79e-05	0.0236618	0.000753679	1.79e-05	0.00160509	0.000378464	0.00267338	6.92e-05	0.00133908	0.001998	0.00109246	0.0109593	0.000893789	0.00363202	0.00707899
S-297	0.000117334	0.00251066	0.00330401	0.00154323	0.000729493	0.000643319	0.00540668	0.00118782	0.000579931	0.00214654	0.00305416	2.82e-05	6.68e-05	0.00565596	0.000581299	0.000175651	8.37e-05	0.00220896	0.00124887	0.0010132	0.0133698	4.42e-05	0.000189496	0.000865877	0.0066317	9.85e-05	0.00102822	6.37e-05	0.000747475	0.000179821	0.000382729	0.000386499	0.0182482	0.000196002	7.01e-05	0.0226498	0.00125618	1.21e-05	0.00122178	0.000247246	0.00134099	0.00021355	0.00704111	0.000825109	0.000895036	0.0109227	0.00101757	0.00595842	0.0123991
S-292	0.00012091	0.00277195	0.00114323	0.000346526	0.00190987	0.000340725	0.00362079	0.000369615	0.000366161	0.00279388	0.00098472	2.55e-05	3.96e-05	0.00270532	0.000146597	0.000140879	0.000106414	0.000719429	7.41e-05	0.000129272	0.0021124	9.36e-06	7.37e-05	0.00408085	0.00271333	3.39e-05	0.000475011	2.08e-05	0.000143839	4.62e-05	0.000320583	NA	0.00239808	2.89e-05	2.22e-05	0.00407075	9.47e-05	4.88e-06	6.83e-05	2.17e-05	0.001497	0.000130147	0.000345644	0.000364809	0.000444543	0.000181878	0.000277882	0.000546806	0.00211034
S-324	9.02e-05	0.00160985	0.00249716	0.00629891	0.000801935	0.000855736	0.00785025	0.0024269	0.000745213	0.00169137	0.00244013	3.33e-05	5.64e-05	0.00425326	0.000838318	0.000140241	0.000152678	0.00112591	0.00475083	0.000938912	0.00931539	4.66e-05	0.000201325	0.000706803	0.0076547	9.65e-05	0.000515613	3.85e-05	0.000388977	0.000192118	0.000431235	0.00582067	0.0186916	0.000232246	7.5e-05	0.023005	0.000299515	1.66e-05	0.000600197	0.000147284	0.00623985	0.00015199	0.00120448	0.000480226	0.000791113	0.00129137	0.00134311	0.00250825	0.00919075
S-268	0.000391336	0.0024688	0.00106241	0.000881689	0.000806586	0.000892434	0.00508858	0.000231011	0.000592104	0.00046722	0.00173352	3.21e-05	5.53e-05	0.00231734	0.000284036	0.000115115	6.03e-05	0.000894466	0.000208114	0.000164779	0.00729187	3.59e-05	0.000143835	0.00026993	0.00240401	5.95e-05	0.00045538	5.79e-05	0.000555334	0.000241405	0.000140904	NA	0.0191205	0.000191077	7.63e-05	0.0266991	0.000162865	1.1e-05	0.000337178	0.000114021	0.00277069	9.33e-05	0.00109387	0.000816824	0.00163435	0.000938894	0.00109363	0.00281438	0.00574829
S-069	8.41e-05	0.000374729	0.0010324	0.0118202	0.00148025	0.000760179	0.0162463	0.000949441	0.000375713	0.000534322	0.00592876	0.000149399	0.000139486	0.000960655	0.000238019	0.00020712	0.000503177	0.00242347	0.002656	0.000408124	0.00459095	5.64e-05	0.00100206	0.00152218	0.00310947	0.000126339	0.000905324	9.11e-05	0.000756242	0.000255877	0.00101897	0.0175195	0.0194175	0.000240726	0.000175061	0.0182337	0.000191583	1.41e-05	0.000206593	3.32e-05	0.00463292	0.000363269	0.00390403	0.000568948	0.00355535	0.000903145	0.000402077	0.00327852	0.0040233
S-291	0.000184063	0.00753815	0.00343881	0.00298131	0.000994902	0.0011785	0.011445	0.00139291	0.000926971	0.00439577	0.00239571	3.92e-05	6.51e-05	0.0137327	0.000496762	0.000108636	0.000152803	0.00104556	0.000573701	0.000473704	0.00385339	4.91e-05	0.00012356	0.00378207	0.00361189	0.000101746	0.000599247	2.81e-05	0.000594407	0.000143156	0.0010431	NA	0.0190114	0.000215491	0.000110586	0.0229821	0.000117174	1.07e-05	0.000381403	0.000141913	0.00687175	0.000484695	0.00135093	0.000792823	0.0016208	0.00150709	0.00185223	0.0053419	0.0122725
S-263	0.000112295	0.000300398	0.00152381	0.00322359	0.000924159	0.000848713	0.00787456	0.000575325	0.000687589	0.00107004	0.00262669	3.07e-05	0.00010478	0.00399079	0.000798134	0.000137946	0.000188677	0.000560598	0.00120742	0.000696492	0.00782794	5.09e-05	0.000125543	0.00127595	0.0078962	8.05e-05	0.00025848	7.21e-05	0.000715293	0.000222386	0.000485302	0.000674432	0.0186567	0.000227999	6.68e-05	0.0204121	0.000516235	1.93e-05	0.000248913	5.31e-05	0.00487384	0.000197821	0.00174891	0.000656807	0.00156666	0.000643951	0.00100519	0.00381017	0.00561307
S-157	0.000100031	0.00205004	0.0021071	0.00497601	0.00603696	0.00135239	0.0111678	0.00112519	0.000884235	0.00214977	0.00631758	9.9e-05	9.62e-05	0.00380666	0.000639766	0.000194225	0.000487442	0.00533063	0.0020126	0.000697926	0.0049725	5.36e-05	0.000684662	0.00158302	0.00656618	0.000165741	0.00228513	7.09e-05	0.00145117	0.000277355	0.000897011	0.00735662	0.0180832	0.000279189	0.000158834	0.020925	0.00062803	1.43e-05	0.000338175	6.88e-05	0.00274812	0.000384507	0.0027605	0.00110374	0.00256896	0.000937323	0.000710487	0.00335039	0.00458994
S-053	0.000294019	0.00689408	0.00237828	0.00251017	0.0080432	0.00131348	0.0204609	0.00162166	0.00139633	0.00118874	0.00311482	9.83e-05	0.000108276	0.0045106	0.000501331	0.000148355	0.000492917	0.00399636	0.00106596	0.000278109	0.00753639	5.43e-05	0.000235093	0.00313095	0.00715762	0.000247636	0.00187664	2.45e-05	0.00144507	0.000206088	0.00127618	NA	0.0195312	6.43e-05	0.000271164	0.0208987	0.00011825	1.46e-05	9.71e-05	4.43e-05	0.0172761	0.000428576	0.00143632	0.00162316	0.0104452	0.000965703	0.000807251	0.00457124	0.00724097
S-146	3.94e-05	0.00113224	0.00170327	0.0112717	0.000515972	0.00077255	0.010227	0.0012877	0.00052533	0.00161084	0.00495345	2.46e-05	8.17e-05	0.00317448	0.000435394	0.000291397	6.15e-05	0.00147895	0.0005561	0.00111675	0.00692934	4.01e-05	0.000194568	0.000669239	0.00407545	7.62e-05	0.000576927	5.91e-05	0.000616908	0.000177261	0.000145493	0.000870201	0.0188679	9.66e-05	4.88e-05	0.0190082	0.000657183	1.94e-05	0.000739316	0.000159162	0.00523564	0.000175824	0.000877476	0.000721804	0.00112874	0.00110663	0.00109498	0.00829058	0.00784997
S-094	9.48e-05	0.00246932	0.00109402	0.0023861	0.00076928	0.000631799	0.00642571	0.000415784	0.000337158	0.000328789	0.00390222	3.06e-05	0.000149773	0.00112973	0.00034853	0.000177024	0.000195447	0.00241522	0.000801681	0.000465626	0.00449181	5.03e-05	0.00021341	0.00143014	0.0033259	0.000126446	0.00110383	6.31e-05	0.000792607	0.000217272	0.000538735	0.000437854	0.0199203	0.000480524	0.000131044	0.0198154	5.71e-05	1.73e-05	0.000191768	4.89e-05	0.00280262	0.00018763	0.0011717	0.000766705	0.00134967	0.000873747	0.000470807	0.00191293	0.00310728
S-079	0.00044347	0.00523193	0.00184945	0.0071079	0.00373771	0.00129552	0.0168451	0.000745453	0.000977922	0.00230231	0.00250861	3.11e-05	6.34e-05	0.00916719	0.000285433	8.59e-05	4.38e-05	0.000512321	0.000551499	0.000770899	0.00618311	4.94e-05	2.66e-05	0.00141161	0.00674663	0.000113693	0.000187765	4e-05	0.000381057	0.000158368	0.00105426	NA	0.0182482	0.000178731	3.97e-05	0.018908	0.000211084	7.85e-06	0.000229844	5.19e-05	0.00108183	0.000107062	0.00192062	0.00259158	0.00168909	0.000947199	0.000606646	0.00455685	0.00580545
S-261	0.000142739	0.00340314	0.00164594	0.00123305	0.00241514	0.000766822	0.00757689	0.00333453	0.000463354	0.0012457	0.00971253	9.24e-05	0.000123246	0.00560764	0.000407097	0.00022653	0.00010951	0.00374359	0.00110161	0.00104404	0.0129274	6.17e-05	0.000280972	0.000880682	0.00976735	0.000145649	0.00120364	5.67e-05	0.000698018	0.00028213	0.000856965	0.00838439	0.0196078	0.000178533	9.06e-05	0.0214206	0.000356346	2.75e-05	0.000506876	0.000162044	0.00284101	0.000315796	0.00277186	0.00141975	0.000854086	0.00121735	0.000653276	0.00416173	0.0100888
S-126	8.89e-05	0.00214759	0.00237568	0.000860896	0.000851356	0.000648	0.00536351	0.000905029	0.000578873	0.00309649	0.00245886	2.71e-05	8.5e-05	0.00516943	0.000504918	0.000162907	7.68e-05	0.00257909	0.000471182	0.000963702	0.00354793	3.88e-05	0.000131628	0.00156586	0.00708973	9.19e-05	0.000921797	0.000106262	0.00118865	0.000231835	0.000694704	0.000622492	0.0182149	0.000186845	5.95e-05	0.0194136	0.000401083	1.36e-05	0.00109893	0.000242804	0.00111533	0.00021998	0.0164497	0.000480866	0.00222571	0.0018729	0.00139604	0.00866778	0.00808879
S-109	0.000369224	0.00151073	0.00159713	0.000694334	0.000382685	0.00129915	0.0119022	0.000489301	0.000922373	0.00122163	0.00104349	1.13e-05	3.25e-05	0.00295548	0.000296414	6e-05	2.32e-05	0.000946633	0.00146708	0.000129591	0.00326189	3.14e-05	7e-05	0.000227794	0.00376389	9.14e-05	0.00047633	3.84e-05	0.000481714	0.000173614	0.000149874	NA	0.0189753	0.000586097	4.34e-05	0.0209419	0.000170371	2.01e-05	0.000172268	7.01e-05	0.00222835	4.28e-05	0.000971046	0.00160309	0.00117023	0.000542227	0.000440659	0.0024916	0.00316694
S-125	8.8e-05	0.00210687	0.00117258	0.00399847	0.000730069	0.000512617	0.00960483	0.00166122	0.00034402	0.00215399	0.00344268	2.59e-05	6.89e-05	0.00431438	0.00035776	0.000165963	4.94e-05	0.000919412	0.000606016	0.000761681	0.00672716	3.48e-05	0.000132675	0.000871784	0.00625414	9.53e-05	0.000546444	3.91e-05	0.000498577	0.0001254	0.000423678	0.00372587	0.0197628	0.000490704	7.59e-05	0.020488	0.000360844	6.38e-06	0.000861337	0.000227331	0.00135512	0.000122377	0.000927375	0.000424068	0.000816523	0.00664851	0.00185981	0.00227358	0.0069993
C-084	NA	NA	NA	NA	NA	NA	NA	NA	NA	NA	NA	NA	NA	NA	NA	NA	NA	NA	NA	NA	NA	NA	NA	NA	NA	NA	NA	NA	NA	NA	NA	NA	NA	NA	NA	NA	NA	NA	NA	NA	NA	NA	NA	NA	NA	NA	NA	NA	NA
C-098	0.000128241	0.000872989	0.00076015	0.0037039	0.00182663	0.000497648	0.0132294	0.000708802	0.000607662	0.000514067	0.00194987	2.19e-05	7.06e-05	0.000980347	0.000216891	9.23e-05	0.00010131	0.000380569	0.000963645	0.000171732	0.00350911	4.29e-05	0.000106142	0.000322581	0.00156187	6.24e-05	0.000404194	5.13e-05	0.000831844	0.000129089	0.000309525	0.00130327	0.0192678	0.000395971	7.73e-05	0.0193085	0.000217569	4.92e-06	7.22e-05	3.06e-05	0.00181287	5.36e-05	0.000478573	0.00056694	0.00108186	0.0007129	0.000367796	0.000677123	0.00138335
C-099	0.000205431	0.00927897	0.00599629	0.00317321	0.010866	0.00213768	0.0157156	0.00114999	0.00110944	0.00168627	0.0116489	3.84e-05	0.000185933	0.0033864	0.0015253	0.000354255	0.000308909	0.00109177	0.00704261	0.00118782	0.0032761	2.15e-05	0.000600012	0.00406329	0.0024323	0.000110245	0.00163327	4.02e-05	0.00156682	0.000171983	0.000887509	0	0.0187617	0.000181884	8.41e-05	0.0180428	0.00124567	5.3e-06	0.000102591	4.05e-05	0.00137167	0.000561849	0.00527721	0.00166957	0.00527128	0.00145446	0.0013141	0.00415352	0.0106065
C-106	7.54e-05	0.00127431	0.000555894	0.00112926	0.00102662	0.000533395	0.0169379	0.000718525	0.00166572	0.00156859	0.00286348	3.7e-05	4.24e-05	0.0057937	0.0192321	6.36e-05	0.000156788	0.00106842	0.00103912	0.000702515	0.00769617	4.98e-05	0.000111707	0.000800992	0.0105943	5.62e-05	0.000641226	5.11e-05	0.00135295	0.000121678	0.000331076	0.000761078	0.0192308	0.000133728	5.03e-05	0.0187143	0.00218987	6.21e-06	7.18e-05	2.39e-05	0.0096383	0.00014516	0.00268835	0.00235287	0.00344656	0.000551119	0.00073431	0.0042011	0.00386325
C-108	0.000141989	0.00437712	0.00180606	0.000791127	0.000621961	0.00148279	0.00546856	0.00103037	0.00147392	0.00160862	0.00256446	1.63e-05	9.65e-05	0.00478362	0.000555864	0.000121962	0.000162277	0.000294296	0.000860014	0.000790226	0.00148854	1.93e-05	0.000168904	0.000312899	0.00222593	8.24e-05	0.000576356	2.31e-05	0.000804323	0.00019271	0.000526187	0.000143588	0.0189036	0.000211981	6.45e-05	0.0164623	0.000378211	5.7e-06	0.000122282	2.33e-05	0.00182112	0.000103389	0.00103589	0.000315515	0.00180194	0.000909717	0.00111065	0.00301967	0.00376176
C-109	0.000449372	0.000765341	0.00078477	0.000559131	0.000357165	0.00090752	0.0119985	0.000757286	0.000419031	0.00103301	0.00124271	1.61e-05	2.91e-05	0.00367613	0.00026158	4.5e-05	1.95e-05	0.00124067	0.000561065	8.85e-05	0.00295461	2.04e-05	0.0001664	0.000207105	0.00401201	5.23e-05	0.000412651	2.33e-05	0.000316604	0.000118449	0.000177254	0.00587139	0.0194175	0.000240506	5.01e-05	0.0197412	0.000325323	2.22e-06	0.000144633	8.08e-05	0.00320383	5.76e-05	0.000481012	0.00315132	0.000916931	0.000939651	0.00280238	0.00125957	0.0016254
C-112	3.87e-05	0.000629943	0.000973206	0.00448393	0.000240821	0.000520423	0.0143726	0.00110658	0.000452699	0.000646998	0.00116811	1.47e-05	3.66e-05	0.00121972	0.000343125	8.56e-05	6.19e-05	0.000816363	0.00100754	0.001667	0.00263122	2.53e-05	0.000175916	0.0001985	0.00231685	4.55e-05	0.00146024	3.68e-05	0.00100997	0.000143464	0.00029124	0.00107944	0.0188679	0.000370906	4.74e-05	0.0188971	0.000589142	1.47e-06	0.000182219	5.66e-05	0.000824821	4.42e-05	0.000308157	0.000323748	0.00044413	0.00120985	0.00091864	0.00109312	0.00242634
C-116	0.000234347	0.00768361	0.00831431	0.00602388	0.00164809	0.00302692	0.0158068	0.00103913	0.00550993	0.00344134	0.0101691	6.82e-05	0.000240396	0.0118322	0.0023017	0.000326444	0.000580725	0.00127316	0.00064557	0.000924482	0.00835657	5.14e-05	0.000602244	0.00199602	0.00628142	7.89e-05	0.00229049	5.49e-05	0.00236404	0.000277817	0.000989211	0.0165517	0.0195695	0.000165958	8.86e-05	0.0156365	0.00193328	5.62e-06	0.000449018	0.000129834	0.00729569	0.000932778	0.0195221	0.000439397	0.00601956	0.00210238	0.0025607	0.0090069	0.00724891
C-119	0.0002591	0.00192193	0.000388403	0.000678901	0.000520664	0.000341466	0.00614485	0.00117017	0.000236428	0.000614308	0.00158049	2.18e-05	6.34e-05	0.0040706	0.000262753	8.82e-05	1.23e-05	0.000285308	0.000780199	0.000440908	0.00482209	2.55e-05	0.000104805	0.000215902	0.00561615	6e-05	0.000260173	1.45e-05	0.000479061	0.000118316	0.000334566	0.00396489	0.019685	0.000196883	4.27e-05	0.0198021	0.000717055	3.22e-06	0.000159426	5.77e-05	0.00205717	7.36e-05	0.000573516	0.000507763	0.000442096	0.00097024	0.000620744	0.00124798	0.00187957
C-125	0.000261103	0.00769963	0.00208137	0.000908205	0.00185318	0.00103795	0.0198036	0.00403565	0.00115759	0.00585917	0.00835009	8.45e-05	9.23e-05	0.00489522	0.000686444	0.000247862	0.000340928	0.00104833	0.00590909	0.00136239	0.00580845	3.3e-05	0.000475381	0.00205448	0.00581944	0.00013913	0.00199661	0.000260548	0.00244723	0.000269404	0.00139876	0.0197193	0.0185874	0.000355425	0.000128842	0.0199545	0.00206661	6.87e-06	0.000567043	0.000220621	0.00299755	0.000211151	0.00535429	0.00190263	0.00252372	0.00690612	0.00233461	0.00462889	0.00812366
C-126	8.89e-05	0.00557964	0.00176873	0.0119569	0.00037154	0.0009267	0.0113238	0.000849546	0.000711103	0.0158604	0.00354755	1.17e-05	4.71e-05	0.00654688	0.0010736	9.3e-05	3.79e-05	0.000269038	0.000659103	0.000844249	0.00161315	2.88e-05	0.000485467	0.000478728	0.00355452	2.23e-05	0.000375616	4e-05	0.0006271	0.000112208	0.000757417	0.00592982	0.0188679	9.96e-05	4.88e-05	0.0183573	0.00045313	NA	0.000402434	0.000102917	0.00139167	6.2e-05	0.00149409	0.000337511	0.0011642	0.00154673	0.00270483	0.00371775	0.00543046
C-022	5.86e-05	0.00260887	0.000778948	0.00892389	0.000536404	0.000480337	0.0103315	0.00156518	0.000267568	0.000779974	0.00355558	2.39e-05	7.7e-05	0.00171973	0.000482982	0.000163235	0.000114834	0.000121501	0.00163105	0.0012097	0.00503555	4.46e-05	0.000321934	0.00194537	0.00343343	9.44e-05	0.000211446	4.52e-05	0.000567448	0.000122365	0.000750091	0.00140422	0.0184502	0.000186963	8.8e-05	0.0184199	0.000335215	1.03e-06	0.000262709	6.81e-05	0.00158457	8.23e-05	0.00123008	0.000866329	0.000847433	0.00106233	0.00109762	0.00202363	0.00343673
C-038	0.000475272	0.00312933	0.00113476	0.00774164	0.00520952	0.000564905	0.0179345	0.00162282	0.000612003	0.000421218	0.00475206	0.000153723	0.000117732	0.00439287	0.000340879	0.000189218	0.000690858	0.000510136	0.00893402	0.000610931	0.00526836	5.57e-05	0.000133816	0.00220015	0.0163523	0.000275909	0.000284597	9.89e-05	0.00113842	0.000309122	0.00147594	0.00519333	0.0185185	0.000282947	0.000119299	0.0154711	0.00113085	1.12e-05	0.00013904	2.26e-05	0.00694308	0.000763389	0.0187882	0.00376682	0.00820803	0.000342638	0.000403759	0.0114998	0.00537649
C-062	8.88e-05	0.00286407	0.00163519	0.00120113	0.00152073	0.00103045	0.0113042	0.00157843	0.000765879	0.000822839	0.0034194	0.000129343	0.000172514	0.0034718	0.00153989	0.000207412	0.00143857	0.000572766	0.000685767	0.000954497	0.00464144	4.96e-05	0.000234888	0.00296379	0.00965569	0.000429532	0.000801151	0.000155389	0.00101122	0.000442129	0.000608583	0.00213884	0.0187617	0.000101833	0.00022944	0.0170061	0.000246497	7.05e-06	0.000302232	7.43e-05	0.00465519	0.000266925	0.00431425	0.000292767	0.00193691	0.000742148	0.0010977	0.00529636	0.00483765
C-065	6.82e-05	0.000751477	0.000505164	0.00700439	0.000326246	0.00102323	0.00367684	0.000648928	0.000496675	0.000641022	0.000676858	4.46e-05	2.92e-05	0.00185541	0.000206654	5.98e-05	0.000243397	0.000581145	0.000924337	0.000172276	0.00442945	2.49e-05	0.000462233	0.000324496	0.00464517	3.32e-05	0.00100064	3.97e-05	0.000537566	0.000123999	0.000133913	0	0.0185185	0.000172406	4.9e-05	0.0208434	0.000287721	8.75e-06	0.000117033	4.3e-05	0.00140974	5.61e-05	0.000821301	0.000492334	0.00148688	0.000560732	0.000418362	0.00154346	0.00172539
C-071	2.86e-05	0.00093959	0.000377554	0.000884566	0.000266034	0.000306589	0.00609144	0.000596563	0.000264211	0.000691583	0.00116651	9.03e-06	2.73e-05	0.00165326	0.000370731	8.59e-05	9.09e-05	0.000357732	0.00103317	0.000418961	0.00142208	3.26e-05	0.000133341	0.000619796	0.00300158	3.54e-05	0.000420226	3.81e-05	0.000644588	0.000113578	0.000682761	0.0122235	0.0196078	0.0001304	4.65e-05	0.0172227	0.000324529	1.72e-05	0.000172543	6.28e-05	0.000525716	4.29e-05	0.000365672	0.000195629	0.00041802	0.000727727	0.000491337	0.000933738	0.00173578
C-077	9.29e-05	0.00185395	0.00163806	0.000716271	0.000278561	0.00108969	0.00620483	0.000420572	0.000792125	0.00163112	0.00139353	2.62e-05	3.97e-05	0.000818487	0.00040583	7.28e-05	0.000152963	0.000199752	0.00114955	0.000135769	0.00133924	2.05e-05	0.000228344	0.000215218	0.0011729	4.78e-05	0.000209171	4.61e-05	0.00088378	0.000117405	0.000433753	0.00175945	0.0189753	9.79e-05	4.97e-05	0.00811535	0.0001091	0.000490323	5.54e-05	2.77e-05	0.00506202	0.000113559	0.000644429	9.68e-05	0.00206125	0.000416308	0.000549987	0.00114941	0.00181399
C-088	0.000408157	0.00305538	0.0012771	0.000773445	0.00251449	0.00104156	0.0188696	0.00104989	0.000808919	0.000886294	0.00352359	6.82e-05	6.25e-05	0.0100245	0.0006107	7.58e-05	0.000236594	0.00138574	0.010272	0.000553066	0.00351679	3.74e-05	0.000164993	0.00165015	0.00658807	0.00017199	0.00131937	5.59e-05	0.00152846	0.000112053	0.00143381	0.00325735	0.0193424	0.000158393	9.14e-05	0.0139469	0.000117913	5.83e-06	0.000115552	3.13e-05	0.00573884	0.000314794	0.017787	0.00103118	0.00670134	0.000622619	0.00111185	0.00627615	0.00617305
C-100	0.000384104	0.00570202	0.00202942	0.0013544	0.0205964	0.00194993	0.0111803	0.00245013	0.00120502	0.000944111	0.0115447	0.000363486	0.000241942	0.00772413	0.00105536	0.000412669	0.000288116	0.00211126	0.00417719	0.00117106	0.00180111	3.77e-05	0.000354094	0.00214193	0.00292053	0.000386452	0.00169567	5.11e-05	0.0010451	0.000189057	0.00157293	0.0163647	0.0182482	0.000155165	0.000214913	0.0205271	0.000577345	1.49e-05	0.000150469	2.98e-05	0.00147119	0.000878885	0.0104686	0.00263891	0.00472074	0.00104401	0.00102264	0.00522268	0.0093004
C-105	0.00016684	0.00300728	0.00299912	0.00257559	0.00051409	0.00143314	0.00953653	0.0015532	0.00124269	0.00403103	0.00142286	2.14e-05	5.71e-05	0.00849151	0.000743913	9.64e-05	0.000117998	0.000333734	0.000364002	0.000738311	0.00479626	3.09e-05	0.000116829	0.000640138	0.00257059	7.46e-05	0.000361038	3.59e-05	0.000897591	0.000171844	0.000267433	0.0037661	0.0184502	0.000176358	6.78e-05	0.0184487	0.000554393	5.28e-06	0.00016839	5.99e-05	0.00201546	5.92e-05	0.00116356	0.000770537	0.00186823	0.000929898	0.00135038	0.00494137	0.00597186
C-122	0.000258939	0.00214145	0.00211479	0.000298694	0.00168857	0.00132583	0.00865026	0.00107288	0.00107722	0.00249626	0.00366976	5.45e-05	6.11e-05	0.00312849	0.000741978	0.000146239	0.000216496	0.00125636	0.00154343	0.000502208	0.00111032	3.99e-05	0.000373114	0.000332839	0.00218641	0.000105414	0.000168617	4.83e-05	0.000664377	0.000204063	0.000405987	0.00618542	0.018797	0.000135541	7.96e-05	0.00484976	0.000655154	1.04e-05	9.45e-05	0.000112758	0.00174373	4.26e-05	0.00278174	1.97e-05	0.00344323	0.00161334	3.09e-05	0.00268177	0.00312849
C-123	8.08e-05	0.00189399	0.000894442	0.000532094	0.000325924	0.000635788	0.00812889	0.000781854	0.000334817	0.00109158	0.00189957	2.01e-05	4e-05	0.00320335	0.000302075	7.32e-05	2.71e-05	0.00048771	0.000519121	0.000492582	0.00522336	3.97e-05	0.000243784	0.000283353	0.0032877	6.18e-05	0.00041809	2.43e-05	0.000541072	9.31e-05	0.000350112	0.00379428	0.0192308	0.000178129	7.97e-05	0.0182144	0.000197899	1.13e-06	0.000108311	6.59e-05	0.000784403	4.89e-05	0.000441174	0.000126976	0.000751094	0.00104405	0.000197446	0.000863116	0.0012388
C-130	0.000180563	0.00294865	0.00218812	0.000457027	0.000526508	0.00146243	0.0171877	0.000523676	0.000404041	0.00126695	0.00148135	1.35e-05	3.47e-05	0.00231398	0.000322999	5.13e-05	0.000173761	0.000470135	0.00342436	0.0004591	0.002976	3.2e-05	0.000103871	0.00089105	0.00336443	0.000101185	0.000424768	2.3e-05	0.000601594	9.07e-05	0.00217511	0.0156589	0.019685	0.000263823	0.000103054	0.0190537	0.000149588	6.36e-06	0.000140801	0.000102265	0.00195256	9.66e-05	0.000700824	0.000165499	0.0015729	0.00178166	0.000637006	0.00325183	0.00375585
C-138	0.000353681	0.00222427	0.00306308	0.00416016	0.0067445	0.0025903	0.0104401	0.00197404	0.00263514	0.00245161	0.00115761	0.000104735	7.47e-05	0.00851242	0.00145309	0.000107836	0.00114245	0.000458294	0.00210969	0.000493809	0.00240897	3.37e-05	0.000199157	0.00318645	0.0057575	0.000172912	0.000585345	0.00011686	0.00108618	0.000302112	0.00118647	0.00850315	0.0193798	0.000246889	0.000105595	0.01832	0.000225586	7.8e-06	0.000132147	4.94e-05	0.00241806	0.000897894	0.0127879	0.000313807	0.0108013	0.000822565	0.000514161	0.00694191	0.0119785
C-140	0.000103469	0.00177071	0.000772973	0.0118206	0.0011801	0.000562172	0.0117586	0.00129141	0.000603766	0.000515258	0.00177388	5.65e-05	6.79e-05	0.00403478	0.000320592	7.5e-05	0.000621731	0.000375859	0.0030194	0.000683263	0.00371402	4.89e-05	0.000155619	0.0016588	0.00492233	0.000140371	0.000473779	3.84e-05	0.000915089	0.000140915	0.00176149	0.00270668	0.0194932	0.000176158	9.2e-05	0.0162815	5.86e-05	8.64e-06	0.000104728	5.37e-05	0.00192092	0.000164344	0.0013796	0.000220326	0.00281198	0.0010371	0.000398515	0.00219951	0.00366116
C-143	0.000129249	0.000990174	0.00112488	0.00608557	0.0015537	0.00116387	0.00986728	0.000895719	0.000820731	0.00122471	0.00105526	2.59e-05	4.33e-05	0.00217976	0.000349881	6.98e-05	0.000374667	0.000349004	0.00146533	0.000366414	0.00185878	2.95e-05	0.000245556	0.00047828	0.00241407	6.12e-05	0.000381631	3.62e-05	0.000777822	0.000145919	0.000142601	0.00736925	0.0185874	0.000175119	5.61e-05	0.0142919	0.000487246	4.36e-06	0.000141888	5.11e-05	0.000941233	9.52e-05	0.000487492	0.000161191	0.00133625	0.000746593	0.000402771	0.000882888	0.00161382
C-144	0.00013637	0.00118047	0.00126463	0.00344257	0.000366802	0.000943154	0.0137867	0.000343525	0.000364461	0.000837739	0.00124187	1.26e-05	1.78e-05	0.000922872	0.000211565	4.84e-05	6.98e-05	0.000374724	0.00188677	0.00030492	0.000923743	1.69e-05	0.000123601	0.000217201	0.00145346	6.71e-05	0.000309058	2.98e-05	0.00055803	0.00011557	0.000497781	0.00518453	0.0182815	0.000251096	7.35e-05	0.0149836	0.000167052	2.94e-06	8.48e-05	4.81e-05	0.000872615	8.53e-05	0.000363235	8.1e-05	0.00107198	0.000721298	0.000363644	0.000663581	0.00116547
C-146	0.000264002	0.00219054	0.0030812	0.00163898	0.00813401	0.00103466	0.0163658	0.00304328	0.000848906	0.00233437	0.00711766	4.53e-05	9.64e-05	0.0033916	0.000421488	0.000226217	0.000175882	0.00236187	0.000540967	0.00142509	0.0119748	7.43e-05	0.00047425	0.00100002	0.00416154	0.000113136	0.00069484	3.64e-05	0.00114551	0.000126237	0.000400444	0.00469718	0.0187617	0.000159113	7.49e-05	0.0161582	0.000909666	4.72e-06	0.000201753	0.000193037	0.00209152	2.15e-05	0.000635624	0.000184377	0.00334413	0.00125266	0.000132001	0.00765433	0.0121273
C-147	0.000202796	0.00156395	0.00226576	0.00180944	0.000431243	0.00172594	0.00755731	0.0010867	0.00123005	0.00233879	0.00323519	4.64e-05	4.61e-05	0.00347376	0.000464098	0.000121701	0.000284378	0.00247865	0.000669154	0.000319665	0.00566051	2.65e-05	0.000210346	0.000246347	0.00524237	8.46e-05	0.00192442	5.81e-05	0.00139267	0.000231163	0.000137943	0.00619633	0.0181818	0.000740927	8.35e-05	0.0118253	0.000355952	9.78e-06	0.000167453	0.000112836	0.006219	0.000187813	0.00345663	0.000438363	0.00425492	0.00100326	0.00075837	0.00274236	0.00322058
C-148	0.00020931	0.00234062	0.00127351	0.000845175	0.000459432	0.000732453	0.0105345	0.00216281	0.000709394	0.00304253	0.00261187	6.01e-05	3.93e-05	0.00737407	0.000408855	7.37e-05	0.000105478	0.00129447	0.00783515	0.00054928	0.00430235	3.77e-05	0.000222021	0.00114258	0.00413117	0.000103806	0.000482915	3.73e-05	0.000651547	0.000128351	0.000757794	0.017457	0.0178571	0.000250864	0.000105451	0.0114493	0.000176221	5.25e-06	0.000159901	7.17e-05	0.00147393	2.9e-05	0.00105319	8.05e-05	0.000993427	0.000947786	0.000122168	0.00300729	0.00317359
C-155	0.000224347	0.00181733	0.00227239	0.000327452	0.00836409	0.00191792	0.00471888	0.000925174	0.000634781	0.00146475	0.00257662	6.78e-05	2.64e-05	0.00607473	0.000319029	9.3e-05	0.000349741	0.000425703	0.00745457	0.000845848	0.00320316	3.32e-05	0.000250613	0.000721156	0.00389623	0.000145635	0.000438076	3.88e-05	0.000729521	0.000109804	0.00112589	0.0184269	0.0194932	0.000105446	8.81e-05	0.0166987	0.000261903	9.42e-06	7.31e-05	3.83e-05	0.00121352	0.000186673	0.00212781	0.000913562	0.00311058	0.000900019	0.000506023	0.00239226	0.00362795
C-157	0.000136979	0.00294075	0.00229971	0.0024262	0.00204593	0.00139918	0.00756769	0.000620085	0.000852944	0.00665564	0.00268277	4.79e-05	2.19e-05	0.00348673	0.000359461	6.97e-05	0.000192657	0.00142671	0.00392088	0.000378648	0.00290189	1.54e-05	0.000184947	0.000533945	0.00237145	9.05e-05	0.00130176	3.21e-05	0.00160314	0.000122864	0.000296507	0.0131181	0.0191571	0.000333694	9.52e-05	0.0182304	0.00134347	6.78e-06	9.53e-05	5.63e-05	0.00167267	0.000107386	0.00144138	0.000506526	0.00501315	0.000944446	0.000303463	0.0027245	0.00247672
C-159	6.13e-05	0.00212028	0.000785001	0.00128915	0.000801447	0.000437554	0.0111878	0.00125009	0.000378664	0.00354692	0.00291087	2.87e-05	3.23e-05	0.00134036	0.000303328	0.000106163	0.000236257	0.00347329	0.00225976	0.00119533	0.00783951	3.5e-05	0.000787262	0.000793741	0.00893727	0.000110519	0.00262611	3.97e-05	0.00204843	0.000253206	0.000352277	0.00797697	0.0189394	0.000162791	7.89e-05	0.018534	0.00224808	1.34e-05	0.000227461	8.8e-05	0.00229095	0.000132076	0.00123925	0.000953432	0.00215638	0.00114591	0.00106593	0.00594253	0.00434773
C-162	9.69e-05	0.00178214	0.00169901	0.0018293	0.00149827	0.000868324	0.00728684	0.00150282	0.000568076	0.0020676	0.0114072	5.26e-05	8.14e-05	0.00134733	0.000514255	0.000224222	0.000153857	0.00305516	0.00106676	0.000799237	0.00274806	4.74e-05	0.00197158	0.000489496	0.0058546	0.00013526	0.0054	1.71e-05	0.00090302	0.000281568	0.000219753	0.00219042	0.0181818	0.000174037	7.3e-05	0.0170179	0.002529	6.77e-06	0.00036334	0.000216921	0.00332477	0.000339524	0.000538098	0.000474229	0.00100833	0.0021942	0.00115225	0.00179122	0.00465269
C-165	0.000234679	0.00533681	0.00330798	0.00417853	0.019435	0.00285006	0.0155551	0.00353947	0.00239568	0.00184124	0.00528607	7.31e-05	0.000121789	0.00556002	0.000326064	0.000126381	0.000211947	0.00107996	0.00318594	0.00476668	0.00160856	5.29e-05	0.000308551	0.00183203	0.00206651	0.000170562	0.000898529	3.62e-05	0.00154652	0.000176152	0.00440263	0.017873	0.0191939	0.000268848	0.000100426	0.0194389	0.000396941	0	0.000130431	2.43e-05	0.000772091	0.000439667	0.00128349	0.00164435	0.00415372	0.00106895	0.000789033	0.00281572	0.00527689
C-170	0.000473638	0.00991252	0.0109059	0.00109583	0.00485923	0.00626891	0.0188076	0.00283771	0.00390881	0.0195987	0.00584566	0.000205321	0.000217874	0.00998058	0.000843902	0.000355794	0.000171892	0.000638267	0.00216379	0.000616076	0.00529066	3.57e-05	0.000535235	0.0195875	0.003433	9.77e-05	0.000735494	0.00037521	0.00233393	0.000184302	0.00113135	0.000250417	0.019084	0.00013343	7.48e-05	0.0194767	0.0017836	7.09e-06	0.000203061	7.56e-05	0.00378762	0.000266802	0.0120193	0.000980134	0.00372788	0.00128588	0.00223822	0.0192335	0.00942118
C-183	7.28e-05	0.00154932	0.000550684	0.000726804	0.000215542	0.000280213	0.00579154	0.00168616	0.000242098	0.000910678	0.00156335	1.39e-05	4.56e-05	0.00121705	0.000284076	7.61e-05	6.63e-05	0.000643786	0.0028338	0.00137735	0.00752639	4.25e-05	0.000214463	0.000312648	0.00567473	0.000122867	0.000462525	3.18e-05	0.000879038	0.000117186	0.000360676	0.00574025	0.019305	0.000127951	8.21e-05	0.0186166	0.00052606	7.27e-06	0.000301884	0.000108836	0.00289324	6.49e-05	0.000556791	0.000379534	0.0010317	0.00155773	0.00173913	0.00808102	0.00749517
C-184	0.000139971	0.00352772	0.00153731	0.00595058	0.0196238	0.0010117	0.0153624	0.00364057	0.000745616	0.000877569	0.00618368	0.000182152	0.000111622	0.00435755	0.000877598	0.000262045	0.0008022	0.00114417	0.0121715	0.00120949	0.00381949	4.64e-05	0.000310783	0.0012285	0.00492399	0.000403591	0.000851454	6.54e-05	0.00127592	0.000234641	0.00313561	0.0121917	0.0190114	0.000109474	0.000122733	0.019555	0.000304397	7.67e-06	0.000307089	4.37e-05	0.00193217	0.000517705	0.00232533	0.00144344	0.007564	0.000947927	0.00106167	0.00363902	0.00610075
C-192	0.000201773	0.00170954	0.00203765	0.00727581	0.0185449	0.000949696	0.0185236	0.00331612	0.000902076	0.00074937	0.0121217	0.000178361	0.000157814	0.00235271	0.000446625	0.000365292	0.00266809	0.00586649	0.00463896	0.00250542	0.0025712	5.19e-05	5.2e-05	0.00236699	0.00427032	0.000332429	0.00231281	6.28e-05	0.00187964	0.000269712	0.000793556	0.00522152	0.0192678	0.000286796	0.000115956	0.0193821	0.00153504	6.81e-06	0.000177566	3.78e-05	0.00244798	0.000455309	0.00165899	0.00228276	0.00809831	0.00133701	0.000999642	0.00323532	0.00857093
C-193	0.000142247	0.00377087	0.00306707	0.0021216	0.00180823	0.00179191	0.0130978	0.00142333	0.00110885	0.00469868	0.00369962	4.58e-05	0.000127727	0.00253957	0.00116815	0.000105489	0.00017588	0.00201533	0.000698183	0.00108341	0.00152747	2.93e-05	0.000267623	0.00197188	0.00222615	0.000125265	0.00135034	5.27e-05	0.00145702	0.000156823	0.000552063	0.00284556	0.0186916	0.000265466	6.56e-05	0.00974314	0.000777535	3.32e-06	0.000160281	6.31e-05	0.00206849	0.000156519	0.00131477	0.00026317	0.00240175	0.00117988	0.000888888	0.00306528	0.00543663
C-196	0.000135654	0.000942174	0.000246337	0.0063282	0.000335651	0.000338235	0.011013	0.000865113	0.000267011	0.000225925	0.0014926	1.74e-05	6.18e-05	0.000284664	0.000181675	6e-05	8.16e-05	0.00131261	0.000404145	0.000245524	0.00558519	3.01e-05	0.000286813	0.000253858	0.00241288	4.19e-05	0.000788692	2.48e-05	0.000817815	0.000113732	0.000214456	0.00365935	0.019685	0.000216315	5.8e-05	0.0127818	0.000164312	6.04e-06	9.62e-05	3.09e-05	0.000608759	6.01e-05	0.000252203	0.000330337	0.000318578	0.000986772	0.000303189	0.000983172	0.00131711
C-197	0.000149156	0.00602868	0.0030903	0.00113014	0.00203098	0.00173581	0.0152274	0.00174483	0.00155601	0.00834483	0.00313203	5.01e-05	4.98e-05	0.00948561	0.00113287	0.000167891	0.000339791	0.00260308	0.00187517	0.0010856	0.00939641	3.64e-05	0.000750847	0.00432026	0.00909941	9.43e-05	0.00202708	4.67e-05	0.00279121	0.000257056	0.000678635	0.00831844	0.0189394	0.000224458	0.000111157	0.0190259	0.00410444	4.87e-06	0.000145454	4.04e-05	0.00104217	0.00023434	0.0188466	0.00143959	0.00477898	0.000859498	0.00114737	0.0104507	0.00521578
C-200	8.09e-05	0.00155887	0.00123942	0.00145693	0.000746903	0.00062028	0.00577718	0.00118821	0.000360469	0.000724955	0.00519924	2.26e-05	8.34e-05	0.00117322	0.00037672	0.000186261	7.16e-05	0.00483955	0.000675781	0.000950675	0.00705357	5.47e-05	0.000447812	0.000529189	0.00454607	9.61e-05	0.00274081	3.31e-05	0.000996641	0.000255734	0.000177056	0.00242328	0.0198413	0.000194537	6.23e-05	0.019438	0.00112938	8.25e-06	0.000739317	0.000199694	0.00149402	9.98e-05	0.000403466	0.000912205	0.00151174	0.00189841	0.00156865	0.00107745	0.00299013
C-202	0.000512038	0.00336226	0.00211745	0.000517374	0.0154665	0.00166131	0.0109477	0.00196139	0.000710809	0.00202751	0.00162047	3.36e-05	2.86e-05	0.0043472	0.000561508	7.81e-05	0.000172206	0.0124857	0.00248329	0.00051634	0.00635807	2.09e-05	0.000186396	0.00110151	0.00737404	0.000127039	0.00317201	3.74e-05	0.000873379	0.000157346	0.000301285	0.00552541	0.0184162	0.000222514	4.92e-05	0.0190327	0.00238229	4.13e-06	0.000172179	4.98e-05	0.00213896	8.98e-05	0.000726005	0.00487304	0.00202064	0.000921004	0.000611424	0.00231472	0.00430446
C-204	0.000171892	0.00256478	0.00119381	0.00318691	0.0189731	0.000758526	0.00830913	0.00255266	0.000729631	0.00137094	0.00271589	7.87e-05	0.000106083	0.0031788	0.000766637	0.000182562	0.000221233	0.00135241	0.000475648	0.0010563	0.00268813	4.51e-05	0.000327069	0.000486472	0.00398065	0.000148856	0.000976829	5.37e-05	0.000453876	0.000211673	0.000358154	0.00488735	0.0191205	0.00019832	7.32e-05	0.020922	0.00358565	7.8e-06	0.000236251	4.44e-05	0.00161376	0.000120701	0.000742583	0.00166955	0.000748103	0.000814867	0.000624442	0.00107625	0.00375014
C-205	NA	NA	NA	NA	NA	NA	NA	NA	NA	NA	NA	NA	NA	NA	NA	NA	NA	NA	NA	NA	NA	NA	NA	NA	NA	NA	NA	NA	NA	NA	NA	NA	NA	NA	NA	NA	NA	NA	NA	NA	NA	NA	NA	NA	NA	NA	NA	NA	NA
C-210	0.000419861	0.00487266	0.00549248	0.0067548	0.0012488	0.00112425	0.017595	0.0037002	0.00103813	0.0103927	0.0101481	2.45e-05	0.000213887	0.00582062	0.00117702	0.000394819	8.66e-05	0.00921175	0.00111483	0.00158997	0.0194423	8.43e-05	0.00106938	0.00161781	0.0132807	0.000249885	0.0057247	2.56e-05	0.00111432	0.000329912	0.000568752	0.00975575	0.0182482	0.000228534	9.36e-05	0.020156	0.00185636	1.14e-05	0.00431744	0.00109681	0.00408373	0.000218081	0.0012838	0.00292269	0.00106474	0.0189913	0.00778919	0.00327827	0.0189432
C-213	0.000142732	0.00475084	0.00561154	0.00841058	0.000371983	0.00303938	0.00715335	0.00218444	0.00264175	0.0155397	0.00397094	3.52e-05	0.000101606	0.012265	0.000873941	0.000185002	0.000113834	0.00240832	0.00198048	0.000204971	0.0110445	6.84e-05	7.27e-05	0.00105072	0.0143722	0.000101958	0.00212717	0.000117572	0.0014677	0.000306797	0.000394063	0.00403146	0.0194175	7.2e-05	9.22e-05	0.0259682	0.000679879	0.00184777	0.000751179	0.000253135	0.00780785	0.000367672	0.00630813	0.000490699	0.00118624	0.00727471	0.00129932	0.00826983	0.0105493
C-216	0.00040872	0.00603004	0.00417384	0.00537881	0.00245274	0.0019095	0.00876086	0.0030922	0.00162315	0.0114776	0.0201827	9e-05	0.000129061	0.015165	0.0016513	0.000337344	0.000892968	0.00152978	0.0171638	0.00056347	0.00802437	4.21e-05	0.000558086	0.00065742	0.00952503	0.000342958	0.00118266	0.000106679	0.000741679	0.000403912	0.000760831	0.0237977	0.0185185	0.000130869	0.000107679	0.0248874	0.000613502	1.95e-05	0.0007566	0.000167941	0.00855823	0.000638845	0.00800268	0.000532704	0.00187639	0.00105353	0.00120278	0.00594182	0.00699577
C-223	0.000214972	0.00461407	0.00205685	0.0014429	0.00103873	0.00132047	0.00398088	0.00205325	0.000890022	0.0036144	0.00178997	4.13e-05	5.29e-05	0.0098266	0.000673652	0.000143681	0.00012893	0.00107243	0.00111705	0.000537896	0.00656886	3.8e-05	0.000276673	0.00133378	0.00888873	0.000154469	0.00109344	5.1e-05	0.000794324	0.000250268	0.000230655	0.00765081	0.0183486	0.000218402	7.39e-05	0.0226459	0.001601	1.51e-05	0.000322824	7.66e-05	0.0024453	0.000229656	0.00161981	0.000824758	0.0017614	0.00101199	0.00103743	0.00515596	0.0081951
C-225	0.000347251	0.00277225	0.00167739	0.00534701	0.00108429	0.00197172	0.0217777	0.00145957	0.00109027	0.00833556	0.00581488	8.75e-05	0.000509768	0.00114634	0.000352909	0.000211225	0.000167662	0.00101172	0.0018898	0.00115444	0.00896576	5.63e-05	0.000649363	0.00191877	0.00360763	0.000256234	0.000822426	0.000267969	0.00113704	0.000537867	0.000304363	0.00288037	0.0189753	0.000167276	7.2e-05	0.0215006	0.000387663	3.7e-05	0.000608661	0.000160653	0.00235607	0.000293175	0.000640586	0.000741344	0.000953854	0.00204759	0.00115186	0.0209552	0.011675
C-231	6.26e-05	0.00128587	0.000562072	0.00255697	0.000262857	0.000475463	0.00405764	0.000937292	0.000280979	0.00125029	0.00304763	2.28e-05	6.47e-05	0.00123213	0.000685068	0.000134315	0.000279978	0.00225509	0.000466002	0.000704963	0.00356923	3.11e-05	0.000321825	0.000574077	0.00453468	7.54e-05	0.00115873	4.91e-05	0.000707707	0.000172275	0.000253224	0.00462009	0.0175439	0.00014452	8.66e-05	0.0173221	0.000340633	7.92e-06	0.000499445	0.000130714	0.000898875	7.13e-05	0.000560843	0.000165815	0.000664974	0.00108041	0.000943437	0.00154696	0.0026167
C-233	7.23e-05	0.00163636	0.00116372	0.000860554	0.000513844	0.000808806	0.00814176	0.00137245	0.00077328	0.00289357	0.000913726	2.77e-05	6.36e-05	0.00171178	0.000276182	0.000133352	7.78e-05	0.000790985	0.000896138	0.000839971	0.00236636	3.38e-05	0.000197078	0.00218521	0.00592594	7.22e-05	0.000760373	4.35e-05	0.000666558	0.000163383	0.000379765	0.0063869	0.0183824	0.00013562	4.86e-05	0.0198087	0.00114508	9.68e-06	0.000391917	9.46e-05	0.00220271	7.56e-05	0.000576901	0.000426599	0.000976957	0.0131916	0.00158456	0.00375747	0.00624799
C-237	0.000527824	0.00543942	0.00702768	0.00498613	0.00925377	0.00294311	0.00871479	0.00276266	0.00126451	0.0101764	0.0108508	2.83e-05	0.00010248	0.00701287	0.00106092	0.000210325	0.000209136	0.0100532	0.00310317	0.000965787	0.0112963	5.06e-05	0.000716689	0.000771252	0.0092021	0.000240227	0.00745437	2.21e-05	0.000963409	0.000336702	0.000337708	0.00749939	0.0186567	0.000177008	7.91e-05	0.0207625	0.00127103	1.75e-05	0.00127865	0.000383401	0.00314938	0.000309787	0.000725498	0.00961507	0.00167095	0.01789	0.00213745	0.00195398	0.0125501
C-240	0.000195013	0.00501584	0.00367455	0.00306378	0.000729819	0.00136592	0.00724461	0.00179584	0.00104781	0.00677666	0.00363063	2.7e-05	5.84e-05	0.00729632	0.000693018	0.000171185	0.000128465	0.000315321	0.0005644	0.000450379	0.00573974	3.55e-05	0.000290419	0.00137	0.00291069	0.000187684	0.000297779	5.88e-05	0.000461021	0.000160758	0.000228011	0.000445932	0.0187617	0.000152294	9.64e-05	0.0193829	0.000622668	1.19e-05	0.000280728	8.72e-05	0.00563989	0.000146651	0.00129624	0.000258279	0.00136126	0.00111804	0.0011833	0.00609149	0.0107177
C-244	0.000104048	0.000715887	0.00060277	0.00505496	0.000216775	0.000642849	0.00334004	0.000669275	0.00061834	0.00116832	0.000441643	8.52e-06	2.88e-05	0.00190482	0.000269855	4.54e-05	0.000227989	0.000848572	0.00085283	0.000133953	0.00119082	1.75e-05	0.000170358	0.000114645	0.00262054	4.37e-05	0.000671973	3.03e-05	0.000537988	0.000111004	9.06e-05	0	0.0190114	0.000172568	5.52e-05	0.0151477	0.00016974	1.11e-05	8.09e-05	3.76e-05	0.00181049	5.66e-05	0.000247427	0.000196557	0.000795849	0.000561554	0.000358821	0.00150117	0.00161062
C-245	6.47e-05	0.00371211	0.00170314	0.00448766	0.00105698	0.000598939	0.015753	0.00121074	0.000438431	0.00076625	0.0040215	4.86e-05	0.000151522	0.000500068	0.000152584	0.000146153	0.000546432	0.00524771	0.000921332	0.000162488	0.0112684	6.83e-05	0.000628307	0.00125397	0.00408067	0.000111818	0.00297787	7.09e-05	0.00285454	0.000288144	0.000254728	0.00152334	0.0191571	0.0001109	8.91e-05	0.0106695	0.000347685	0.000587082	0.000160651	3.32e-05	0.00626128	0.00036491	0.00190137	0.000913753	0.00323754	0.000807389	0.000822432	0.00251294	0.00590418
C-246	0.000134967	0.0021943	0.00096957	0.00460993	0.000862467	0.000318761	0.0111442	0.00154383	0.000245994	0.00334803	0.00550931	3.81e-05	7.18e-05	0.00298652	0.000828503	9.83e-05	0.000215295	0.000733513	0.0098754	0.0011954	0.00690162	4.5e-05	0.000339294	0.000454301	0.00660374	0.000162745	0.000905995	3.21e-05	0.000672344	0.000158536	0.000484857	0.0170674	0.018622	0.00014668	8.5e-05	0.0193678	0.000585087	1.11e-05	0.000316642	0.00010464	0.00371193	0.000142527	0.00111522	0.000430847	0.00140022	0.00148576	0.00238133	0.00403868	0.00638953
C-247	0.000212378	0.00249452	0.00190174	0.000853827	0.000553994	0.000736023	0.00406384	0.000494845	0.000707519	0.00654614	0.00154843	4.49e-05	4.15e-05	0.00708817	0.000353249	6.75e-05	0.000128778	0.00111982	0.0103324	0.00106673	0.0043187	2.23e-05	0.000106172	0.000411607	0.00477439	9.09e-05	0.000943622	3.77e-05	0.000448843	0.00011184	0.000336179	0.0196927	0.0192308	0.000163312	7.42e-05	0.0223366	0.000502424	9.23e-06	0.00038976	0.000155568	0.00343053	0.000111675	0.00120335	0.000384191	0.00188309	0.0151727	0.00155983	0.0041395	0.00723659
C-248	8.99e-05	0.00409488	0.00150651	0.00457794	0.0183345	0.000630814	0.0143804	0.00402594	0.000403	0.00115988	0.00530333	0.000231791	0.000166245	0.00161107	0.000279368	0.000246276	0.000649595	0.00475881	0.000788728	0.000629043	0.00335997	6.12e-05	0.000320531	0.00307659	0.00517502	0.00017864	0.00474305	6.5e-05	0.00169325	0.000260036	0.000566371	0.00693512	0.0186916	0.000163487	7.29e-05	0.0196736	0.00108755	0.00112409	0.000151702	1.9e-05	0.00173955	0.000379371	0.001839	0.00196864	0.00213555	0.000299398	0.000462914	0.00258448	0.00801759
C-249	9.78e-05	0.00140964	0.00111433	0.000951267	0.000722552	0.000865852	0.00621292	0.000883843	0.00051557	0.00354088	0.00092625	2.82e-05	4.71e-05	0.00209778	0.000345427	8.53e-05	0.000273863	0.00111327	0.00258094	0.000150525	0.00204395	2.9e-05	0.000218405	0.000303677	0.00286536	5.02e-05	0.000633369	4.08e-05	0.00169952	0.000143956	0.000447719	0.00378719	0.019305	0.000159063	3.66e-05	0.0164643	0.000664296	0.000507517	6.87e-05	1.57e-05	0.00293099	0.000172542	0.00230328	0.00100376	0.0038035	0.000477789	0.000574027	0.00310876	0.0041411
C-251	8.27e-05	0.00105936	0.000675298	0.0089811	0.000683746	0.00033751	0.0140633	0.00053468	0.000233464	0.000893478	0.00127562	1.72e-05	2.1e-05	0.000940109	0.000207953	7.51e-05	0.000174883	0.00122062	0.00146353	0.000727849	0.00215773	3.83e-05	0.000201811	0.000234159	0.00246901	4.99e-05	0.00059793	2.13e-05	0.00106361	0.000123582	0.000650037	0.00408566	0.0188324	0.00018297	7.83e-05	0.0120739	0.000461315	2.31e-05	0.000254001	6.01e-05	0.0043694	0.000146843	0.000725542	0.00024672	0.0017941	0.00195781	0.00159315	0.00197893	0.00385348
C-252	0.000131029	0.000664796	0.000622183	0.000774489	0.000254839	0.000650505	0.00336601	0.000668478	0.000473819	0.000810783	0.00113018	1.36e-05	1.21e-05	0.00294258	0.000333601	4.01e-05	7.15e-05	0.000500952	0.00203126	0.000221299	0.00272563	2.17e-05	0.000122738	0.000131	0.00275235	4.66e-05	0.00031844	1.91e-05	0.000527999	9.86e-05	0.000411348	0.00377881	0.0196078	0.000156278	8.79e-05	0.0180014	0.000123202	2.03e-05	5.94e-05	3.15e-05	0.00107942	4.66e-05	0.000480573	0.000288611	0.000569713	0.000678131	0.000514606	0.000917838	0.00199961
C-253	0.000445537	0.00387673	0.0028829	0.000731814	0.000810861	0.00108485	0.00987721	0.000938461	0.000605495	0.0178599	0.00230673	2.31e-05	2.53e-05	0.0156886	0.00044976	7.82e-05	7.65e-05	0.000831424	0.00611673	0.000474313	0.00490612	2.21e-05	0.00016523	0.00410679	0.0058682	8.3e-05	0.000608029	1.87e-05	0.000540312	9.72e-05	0.000744425	0.00963649	0.0188324	0.000215094	6.63e-05	0.019884	0.000460973	1.02e-05	0.000498458	0.000269501	0.00311177	0.000119998	0.00468718	0.000589301	0.00149386	0.0147164	0.00183798	0.0052249	0.00828948
C-254	0.000193371	0.00271906	0.000878061	0.0034275	0.00159128	0.000435134	0.0158875	0.00258224	0.000285842	0.00286692	0.012634	7.6e-05	0.000126617	0.00222039	0.000182334	0.000289755	9.91e-05	0.00340482	0.00110564	0.000770239	0.00534365	4.21e-05	0.000368983	0.000946018	0.00690242	0.000120464	0.00232075	3.76e-05	0.000656464	0.000194006	0.000676898	0.022268	0.0189394	0.000253669	9.76e-05	0.0226773	0.00226343	1.63e-05	0.000880302	0.000226212	0.00331158	0.000306611	0.0050562	0.000644725	0.000914381	0.0109778	0.000793081	0.00357385	0.0048551
C-255	0.000254562	0.00236467	0.00196424	0.00268531	0.0012236	0.0010613	0.00488387	0.00135446	0.000515241	0.00419977	0.0052163	6.17e-05	4.78e-05	0.00702997	0.000598991	9.99e-05	0.000121016	0.00111881	0.00345851	0.000619175	0.0076065	3.93e-05	0.000289049	0.000234496	0.00248019	9.33e-05	0.000821105	2.67e-05	0.000572069	0.000146874	0.000127399	0.00444014	0.0197239	0.000284114	6.03e-05	0.0201454	0.000438287	7.09e-06	0.000288458	7.99e-05	0.0016746	0.000244514	0.0015222	0.00126326	0.0014169	0.00154294	0.00112419	0.00332801	0.00810617
C-259	0.000111452	0.00214627	0.00122926	0.00154809	0.00083931	0.000395879	0.0132614	0.00124411	0.000304769	0.00158739	0.00392357	3.45e-05	0.000104525	0.00329836	0.000337555	0.000158739	0.000161792	0.00128632	0.00127185	0.000485581	0.00698849	4.1e-05	0.000273713	0.0012226	0.00465248	9.04e-05	0.000644555	4.32e-05	0.000880403	0.000186976	0.000596593	0.00746532	0.0197239	0.000172388	0.000122254	0.0200417	0.000388248	1.27e-05	0.000171419	3.23e-05	0.00128664	0.000117587	0.000897222	0.00249219	0.0008878	0.00129175	0.000909228	0.00141767	0.00266678
C-261	0.000418718	0.00200548	0.00200045	0.000728182	0.00217035	0.00108863	0.00958525	0.00177688	0.00068485	0.00757363	0.00275215	2.97e-05	5.38e-05	0.00981758	0.000600625	0.000120613	7.88e-05	0.00156651	0.00424502	0.000697072	0.00584693	4.37e-05	5.46e-05	0.000850955	0.00805861	0.000133668	0.000754816	3.02e-05	0.000698924	0.000124409	0.000587261	0.0116319	0.0198413	0.000190919	9.67e-05	0.0209002	0.000400447	4.6e-06	0.00112844	0.000256626	0.00109946	0.000118205	0.000674912	0.00128174	0.000853856	0.0206746	0.00109221	0.00281313	0.011582
C-263	0.00021059	0.00575748	0.0012598	0.00287983	0.000678035	0.00113549	0.00782384	0.00129206	0.000879739	0.00452394	0.00540345	3.15e-05	0.000121962	0.00661823	0.000743402	0.000129631	0.000171001	0.000661396	0.000629165	0.000878975	0.00280835	3.63e-05	0.000253319	0.000975101	0.00352408	9.56e-05	0.000410115	4.83e-05	0.000607235	0.000139506	0.000495064	0.0058868	0.0183486	0.000120604	7.95e-05	0.0190794	0.000454796	7.5e-06	0.000194573	4.04e-05	0.00154125	0.000163022	0.000760126	0.000806392	0.00134472	0.000760607	0.00127921	0.00279395	0.00365804
C-264	0.000234882	0.00543237	0.00550409	0.00535245	0.00920821	0.00230828	0.0107551	0.00155614	0.00208573	0.00423014	0.00518232	0.000106788	0.000115668	0.0133041	0.0013432	0.00023715	0.00122712	0.00154828	0.00346828	0.000293435	0.00509632	3.66e-05	0.000442484	0.00218175	0.0105072	0.000117744	0.00153058	0.000104871	0.00173927	0.000263024	0.000807823	0.0141058	0.0187266	0.000225554	5.27e-05	0.0166652	0.00123603	0.000595781	0.000214566	8.51e-05	0.005388	0.000983258	0.0216854	0.00044456	0.0042886	0.000709277	0.00250336	0.0172938	0.00860713
C-265	0.000399229	0.00641019	0.00283988	0.00195008	0.00175393	0.00133452	0.00854735	0.00299476	0.00111187	0.00715038	0.00944	0.000119393	0.000208712	0.0138487	0.00193304	0.000224634	0.00102028	0.00240938	0.00657836	0.000732317	0.0059276	5.1e-05	0.000404536	0.0012092	0.00888037	0.000391286	0.00150561	5.64e-05	0.0010293	0.000290053	0.000553678	0.00404778	0.019685	0.000221962	0.000120115	0.0234559	0.000417389	1.86e-05	0.000707442	0.000156543	0.00399976	0.00104291	0.00674079	0.000639568	0.0025813	0.00136716	0.000896334	0.00485277	0.00793588
C-266	0.000332338	0.00182045	0.00126074	0.000587417	0.00153568	0.00157777	0.00506273	0.00131951	0.00177004	0.00233787	0.00166746	9.3e-05	0.000101886	0.00373878	0.000379702	0.000113586	0.000255874	0.000547213	0.00161473	0.000423419	0.00188426	3.3e-05	0.000239501	0.000659407	0.00270272	0.00018531	0.000355805	NA	0.000184548	6.79e-05	0.000251765	0.00418235	0.0188324	3.44e-05	0.000111962	0.0116966	0.00023569	1.07e-05	0.000113221	2.18e-05	0.000852871	0.000467103	0.000274137	0.00029704	0.000614994	0.000550992	0.000267475	0.000392363	0.00256899
C-268	0.000157013	0.00120237	0.00147469	0.00497436	0.000376906	0.000926117	0.0128393	0.000779271	0.000613366	0.000506026	0.00145789	1.29e-05	5.87e-05	0.00116165	0.000396427	8.77e-05	0.000109512	0.0010683	0.0004355	0.000297342	0.00360779	2.89e-05	0.000191422	0.000177838	0.000755405	5.9e-05	0.000616755	2.89e-05	0.000622721	0.000128773	0.000130743	0.00215716	0.0192308	0.000279819	7.28e-05	0.0193855	0.000289117	5.56e-06	0.000193942	5.08e-05	0.00121888	6.73e-05	0.000240168	0.000528444	0.00138826	0.00110007	0.00100354	0.00108217	0.00286319
C-269	0.000301637	0.00384757	0.00280349	0.0101008	0.000447651	0.00159287	0.0159945	0.00131087	0.000757841	0.00809914	0.00182257	1.4e-05	2.74e-05	0.0107181	0.000411981	7.44e-05	5.34e-05	0.00152797	0.00152438	0.00123378	0.0102341	3.98e-05	0.000203353	0.00047451	0.0097029	9.16e-05	0.000897212	3.31e-05	0.000857208	0.000103615	0.000503735	0.018603	0.018315	0.000109603	9.55e-05	0.0194517	0.000736485	1.13e-05	0.000543796	0.000159957	0.00263672	8.66e-05	0.000743756	0.00122978	0.001251	0.0103448	0.00178804	0.00487822	0.00805538
C-271	8.64e-05	0.00202668	0.000973548	0.000612573	0.000912063	0.000478776	0.00568274	0.00187426	0.00030604	0.00143267	0.00547472	6.03e-05	9.42e-05	0.00276851	0.000452839	0.000121159	0.000335235	0.000945241	0.00497593	0.000603686	0.00638698	3.69e-05	0.000353832	0.000807329	0.00496286	0.000125668	0.000496879	5.27e-05	0.000397509	0.000188666	0.000314696	0.00864212	0.0188679	0.00020226	8.63e-05	0.0219488	0.000282078	1.15e-05	0.000528147	0.000115892	0.00412012	0.000221087	0.00129219	0.000348796	0.000733798	0.00107493	0.000857787	0.00306125	0.00392144
C-273	0.000403749	0.00668237	0.00173626	0.00193455	0.0015873	0.00105691	0.0167085	0.0030396	0.000738605	0.00305011	0.0152372	6.79e-05	8.9e-05	0.00912842	0.000838505	0.000305389	0.000287766	0.00102533	0.00390702	0.000483094	0.00700565	4.77e-05	0.000464281	0.000686725	0.00367854	0.000172538	0.000632667	4.08e-05	0.000540723	0.000199799	0.000851802	0.0188744	0.0182149	0.000204531	0.000123444	0.0197429	0.000840014	1.36e-05	0.000340546	7.99e-05	0.00195714	0.00034644	0.0109411	0.00108751	0.0015693	0.00119017	0.000880485	0.00507205	0.00662445
C-274	0.000193424	0.00121666	0.00153297	0.00674677	0.000656051	0.00113975	0.0113863	0.000518748	0.000926448	0.000955153	0.00216488	2.52e-05	4.79e-05	0.00105703	0.000493624	8.62e-05	0.000266032	0.00185871	0.00164757	0.000325105	0.00304274	2.89e-05	0.000216443	0.000241002	0.00195182	3.86e-05	0.000692575	3.11e-05	0.000467747	0.000129891	0.000185918	0.00399249	0.0188679	0.000207996	0.00010238	0.0143004	0.000389862	8.1e-06	0.000107405	4.97e-05	0.00306105	0.000112964	0.000525469	0.000282111	0.0036709	0.00126691	0.000760222	0.00188166	0.00451118
C-276	0.000677471	0.00237009	0.00246595	0.00494246	0.0211947	0.00279066	0.013404	0.00482208	0.000860348	0.00447865	0.0102839	0.000135059	0.000187447	0.00332863	0.000415282	0.000148584	0.000327885	0.004544	0.00516868	0.00108778	0.00136937	4.68e-05	0.000360748	0.00197465	0.00288844	0.000164658	0.00321468	2.81e-05	0.000953621	0.000294493	0.000341036	0.00433352	0.0193798	0.000567534	9.26e-05	0.021179	0.00278323	1.36e-05	0.000247266	6.42e-05	0.000569741	0.000320081	0.00358385	0.00503465	0.0023002	0.00132052	0.00119016	0.00323924	0.00593171
C-278	0.000158609	0.0045699	0.00293084	0.00160001	0.000308298	0.0008178	0.0153274	0.00244806	0.000944493	0.00359455	0.00213994	2.56e-05	6.93e-05	0.00472241	0.000558043	9.94e-05	7.92e-05	0.00627673	0.00177613	0.00223918	0.0201263	6.9e-05	0.000180119	0.000948862	0.0176906	0.000130425	0.00317063	3.88e-05	0.00181536	0.000217162	0.000518331	0.00289764	0.0198807	0.000125601	6.32e-05	0.0206151	0.0010464	8.65e-06	0.00106697	0.000324711	0.00629615	6.53e-05	0.000944069	0.00193832	0.00118405	0.0196815	0.0014904	0.00469914	0.010217
C-279	0.000157703	0.00250769	0.00252237	0.00717146	0.000804835	0.000850443	0.0113924	0.00331537	0.00088831	0.0025925	0.0031198	3.73e-05	8.11e-05	0.00588946	0.00114355	0.000183185	0.000134397	0.00252693	0.00129054	0.00103689	0.00728343	6.01e-05	0.000252769	0.00107288	0.0112573	0.00024712	0.00178369	0.000117535	0.000971032	0.000285071	0.000480307	0.00869447	0.0197239	0.000110673	0.000115401	0.0279419	0.000546375	3.62e-05	0.000621566	0.000142807	0.00567556	0.000204734	0.00120104	0.000819689	0.00181783	0.00117087	0.00137707	0.00555735	0.00774118
C-280	0.000503849	0.00390378	0.00304135	0.00906773	0.00161214	0.00191163	0.00948562	0.0027356	0.00140827	0.0108882	0.0160478	0.000107803	7.44e-05	0.0118774	0.000955588	0.000249226	9.58e-05	0.0013102	0.00350038	0.000577239	0.00707784	3.34e-05	0.000382688	0.000585767	0.00528198	0.000245604	0.000784733	4.74e-05	0.000422911	0.000224285	0.000430231	0.0157565	0.0184502	0.000174138	0.000146706	0.0255063	0.000601464	1.34e-05	0.000685005	0.000274394	0.0033225	0.000521847	0.00439295	0.000671609	0.00187929	0.00174979	0.00221636	0.00462282	0.0084897
C-282	0.000218474	0.00484548	0.00156045	0.00133383	0.00146047	0.000617738	0.00414871	0.0029528	0.000572837	0.00582495	0.0182192	9.22e-05	9.9e-05	0.0071841	0.000933567	0.000264116	0.00028218	0.00210086	0.00164248	0.000617257	0.00541217	4.29e-05	5.07e-05	0.000279848	0.00658387	0.000135186	0.00192092	3.65e-05	0.000613185	0.000211552	0.000384162	0.0108441	0.0186567	0.000279145	7.34e-05	0.0250433	0.00188731	1.39e-05	0.000355733	0.000140405	0.00283424	0.000213218	0.00482438	0.00105842	0.00198537	0.00117843	0.00139369	0.00403684	0.00657187
C-283	6.02e-05	0.00162689	0.000275852	0.00400279	0.000966347	0.000467052	0.0149358	0.00099198	0.000303802	0.000987039	0.00159572	4.1e-05	5.64e-05	0.00145072	0.000285272	0.000117327	0.000329435	0.000891547	0.00298616	0.000182831	0.00248387	3.25e-05	0.000277026	0.000435829	0.001728	9.18e-05	0.000366248	6.63e-05	0.00103315	0.000189471	0.00114544	0.00398716	0.0185529	0.000182985	6.35e-05	0.0127511	7.42e-05	0.000781385	0.000110162	1.99e-05	0.00568471	0.000306921	0.000904271	0.000355995	0.00411601	0.000395773	0.000518381	0.00144093	0.00201682
C-285	3.54e-05	0.000843413	0.00064123	0.00201378	0.000335386	0.000263792	0.00655278	0.00122728	0.000209201	0.00136929	0.0016927	1.08e-05	2.95e-05	0.00166974	0.000237069	9.12e-05	0.00011993	0.000859123	0.00925381	0.000705511	0.00411519	3.84e-05	0.000153671	0.000482391	0.00365958	6.94e-05	0.000401664	2.84e-05	0.000403955	0.000110944	0.00031759	0.0128472	0.0191205	0.000377761	5.86e-05	0.0199698	0.000599325	1.34e-05	0.000293011	5.92e-05	0.00317934	7.53e-05	0.000502976	0.000569166	0.000544205	0.00108383	0.00105702	0.00120825	0.00348504
C-287	0.000210048	0.00850936	0.00376051	0.0017704	0.000750564	0.00121729	0.00923646	0.0025876	0.000843318	0.0129753	0.00437538	3.65e-05	6.09e-05	0.0181938	0.000822186	0.000158374	0.000124169	0.00307653	0.00303415	0.00110831	0.0115345	5.82e-05	0.000331483	0.000906487	0.00778728	0.00014871	0.00179317	3.75e-05	0.000819453	0.000171504	0.000471712	0.00632862	0.018315	0.000328666	8.75e-05	0.0191632	0.00115457	1.61e-05	0.000727517	0.000182915	0.00175919	0.000213429	0.00156114	0.00287597	0.00144213	0.00201353	0.00147092	0.00284822	0.0146311
C-289	0.00017041	0.00197203	0.00239615	0.00240921	0.00117917	0.00142381	0.00583869	0.00137024	0.00111192	0.00261705	0.0117351	5.06e-05	0.000139977	0.0018269	0.00113813	0.000231175	0.000145535	0.00518227	0.00245517	0.000658338	0.0047239	4.65e-05	0.000821717	0.000376341	0.00378494	0.000134118	0.00189577	4.97e-05	0.000876522	0.00023007	0.000330274	0.00764571	0.0193798	0.000228429	0.000115905	0.0197694	0.00117446	1.16e-05	0.000712407	0.000170108	0.00457826	0.000178646	0.000756733	0.000410356	0.00204595	0.00172683	0.00137252	0.00193219	0.00463026
C-291	0.000186433	0.00205639	0.00251506	0.00263824	0.000692659	0.00122485	0.00640293	0.00130339	0.000731643	0.00662985	0.00175312	1.41e-05	4.67e-05	0.00908148	0.000753822	0.000128919	8.03e-05	0.000714216	0.00175221	0.000381579	0.00517143	3.41e-05	0.000245673	0.000616162	0.00467131	9.77e-05	0.000360701	1.94e-05	0.000421893	9.76e-05	0.000488205	0.0105696	0.0182482	0.000161396	8.49e-05	0.0193042	0.000816146	1.09e-05	0.000542324	0.00012278	0.00287944	0.000154521	0.000477257	0.000273623	0.00082616	0.00183259	0.00235115	0.00339441	0.00688169
C-292	0.000237869	0.0102553	0.00612091	0.00492068	0.0160451	0.00340823	0.0179835	0.0043077	0.0020835	0.0080946	0.00999394	0.000237933	0.000379432	0.0057844	0.000707079	0.00030201	0.00157969	0.00156407	0.00384291	0.000679457	0.00216444	5.75e-05	0.000589808	0.00629989	0.00335187	0.000344578	0.00102717	0.000102964	0.00120484	0.000288471	0.000628152	0.00386154	0.02	0.000203463	0.00013721	0.0217888	0.00044991	2.21e-05	0.000214217	4.18e-05	0.00145007	0.00151117	0.0137239	0.00157739	0.00414809	0.000904652	0.00126133	0.00609988	0.0125932
C-293	0.00037293	0.00630853	0.00188756	0.003785	0.00144055	0.00146346	0.0167124	0.00212812	0.000648145	0.00890914	0.0039951	3.09e-05	5.77e-05	0.0111646	0.000279072	9.38e-05	0.000102263	0.000704587	0.00179713	0.000487339	0.00367646	2.91e-05	0.000296111	0.00100594	0.00353073	0.000109171	0.000457837	3.74e-05	0.000422205	9.5e-05	0.00200047	0.0101831	0.0181818	0.000146789	0.000102723	0.0196265	0.000766814	8.09e-06	0.000196812	5.48e-05	0.00231026	0.00024721	0.00296309	0.00112219	0.00232338	0.00126598	0.000990767	0.00427256	0.00543605
C-294	0.000216275	0.00343753	0.00452369	0.00519344	0.000802907	0.00259141	0.0130507	0.00138802	0.00239381	0.00332422	0.00225587	2.64e-05	0.000130932	0.00311548	0.000828278	0.000125283	0.000215318	0.0133616	0.000324305	8.65e-05	0.0135193	7.93e-05	0.000634072	0.000633516	0.0144964	0.00012266	0.00572338	3.11e-05	0.00174638	0.000348843	0.000644566	0.00500652	0.0195312	0.000193404	6.14e-05	0.0208689	0.000750065	0.000988038	0.000205873	3.48e-05	0.00526416	0.000176181	0.000475577	0.00172162	0.00167418	0.000658178	0.000550982	0.00169579	0.0060153
C-295	0.000144564	0.00548061	0.00206143	0.00166688	0.00187992	0.000607751	0.00775168	0.00269894	0.000415446	0.00376697	0.00996468	5.75e-05	0.000213625	0.00172005	0.000315582	0.000425452	0.000138122	0.0144646	0.000679559	0.00143115	0.0132101	4.94e-05	0.000472179	0.00114729	0.0127836	0.000144106	0.00690503	5.12e-05	0.00112234	0.000415282	0.000400469	0.00813142	0.0193798	0.000494382	9.18e-05	0.0223567	0.00759466	1.37e-05	0.00212137	0.000477934	0.00276993	0.000220165	0.00146294	0.00144338	0.00110776	0.0127498	0.00103088	0.00554817	0.0084813
C-296	0.000205592	0.0144431	0.023895	0.00117351	0.00433128	0.0245599	0.00548546	0.00189055	0.0242484	0.0245653	0.0121572	0.000108944	0.000230866	0.0225622	0.00663847	0.0007981	0.000163793	0.00258018	0.00122061	0.00367388	0.00580387	6.41e-05	0.000929307	0.0241718	0.00791583	0.000148414	0.00200746	0.000147876	0.00167012	0.000267503	0.0006114	0.00630181	0.0186567	0.000238036	0.000135652	0.0226479	0.0157821	2.29e-05	0.00443714	0.00146912	0.00802244	0.000670228	0.0145249	0.000496326	0.00121584	0.0238407	0.0133917	0.024513	0.0241616
C-297	0.000489866	0.00726352	0.0115074	0.00169881	0.00477037	0.0224344	0.0240423	0.00213277	0.00962937	0.0205052	0.00738786	0.000122422	0.00450158	0.0114384	0.00224126	0.000825682	0.000181696	0.000428388	0.0241664	0.00185541	0.00311293	8.98e-05	0.00032512	0.0193513	0.00462101	0.000802228	0.000305504	0.02056	0.0242462	0.01046	0.00223487	0.0217995	0.0189036	0.000130382	0.000305433	0.0219801	0.00196891	5.54e-05	0.00187119	0.000513213	0.00216358	0.0037836	0.00208263	0.000231092	0.000325049	0.00465253	0.000998956	0.0238553	0.0160452
C-301	0.000414627	0.0032988	0.00178553	0.004246	0.000686588	0.000975897	0.00885465	0.00236713	0.000824092	0.00293452	0.00806515	6.58e-05	9.35e-05	0.0119642	0.000935268	0.00022277	0.000978366	0.00102111	0.00569703	0.000695919	0.00661306	3.51e-05	0.00028421	0.000502299	0.00658032	0.000171366	0.000649422	8.01e-05	0.000727153	0.0003005	0.000351712	0.0117658	0.0195695	0.000515446	0.000134489	0.0170089	0.000388332	1.51e-05	0.000664911	0.000171238	0.00883858	0.000352449	0.0100254	0.000287417	0.00412774	0.00100069	0.00120842	0.0074672	0.00539301
C-302	0.000169678	0.00326512	0.00339219	0.00445457	0.00200413	0.00109976	0.0175964	0.00253105	0.000954471	0.00186853	0.00490313	0.000270129	0.000160982	0.00157537	0.0003163	0.000239182	0.00191488	0.00350941	0.00900516	0.000148696	0.0103953	3.69e-05	0.000663268	0.00135668	0.00726738	0.000195548	0.00152218	0.000153957	0.00316792	0.000501575	0.000505969	0.00740593	0.0194175	0.000139103	0.000103205	0.0145155	0.0015638	0.00065776	9.44e-05	1.78e-05	0.00953728	0.000824033	0.00776407	0.000738312	0.00665874	0.000187348	0.000414245	0.00437238	0.0107191
C-303	0.000584791	0.00177954	0.00286112	0.00193168	0.00256779	0.00179346	0.0208083	0.00195624	0.0012191	0.00628533	0.00895978	8.19e-05	0.000119807	0.00192306	0.000513897	0.00016522	0.000573623	0.00529465	0.00138418	0.00039561	0.00144047	4.19e-05	0.000766587	0.000423176	0.00273075	0.000118287	0.00253973	5.91e-05	0.00100899	0.000227739	0.000646568	0.0211626	0.0196078	0.000266084	0.000248802	0.0211335	0.00123892	2.09e-05	0.000346485	0.000102596	0.00323475	0.000324114	0.00127638	0.000524075	0.00209192	0.0018604	0.000867309	0.00126748	0.00361693
C-305	0.000137387	0.000854124	0.00212775	0.00149244	0.000802465	0.00134205	0.00660728	0.000605605	0.000774121	0.00482602	0.00133205	3.94e-05	6.51e-05	0.00163884	0.000381287	4.91e-05	0.000170508	0.00349169	0.00134085	7.06e-05	0.00197388	2.2e-05	0.000187907	0.000862633	0.00158911	6.46e-05	0.00150952	3.83e-05	0.000805217	0.000119546	0.000128593	0.0051225	0.0195312	0.000122108	5.11e-05	0.0165708	0.000651222	0.00069997	5.27e-05	7.21e-06	0.00255345	0.000303024	0.00176927	0.000616329	0.00190906	0.000248329	0.000483371	0.00161967	0.00267448
C-306	6.26e-05	0.000404194	0.000184592	0.000946202	0.000960816	0.000198554	0.0095385	0.000820986	0.00015895	0.000398235	0.00206377	8.95e-06	3.73e-05	0.000593055	0.000139593	0.000104643	0.000209226	0.000897201	0.00119829	0.000469796	0.000826826	3.08e-05	0.000447118	0.000213169	0.000821016	5.79e-05	0.000367228	3.68e-05	0.000385014	9.65e-05	0.000255441	0.00447907	0.0189394	0.000129662	4.58e-05	0.0115137	0.00114081	9.1e-06	0.000168911	4.2e-05	0.00104323	5.59e-05	0.000225115	0.000117479	0.00139252	0.00114989	0.000689842	0.000973563	0.00227872
C-307	0.00030801	0.00201322	0.00338147	0.00124183	0.00450824	0.00251885	0.0197107	0.00130843	0.00131081	0.0011025	0.00190994	2.92e-05	6.29e-05	0.00391467	0.000606648	0.000168182	0.00406639	0.000808149	0.00251153	0.000189925	0.00737471	4.07e-05	0.000756672	0.00220191	0.0030132	8.37e-05	0.000398653	6.12e-05	0.000991315	0.000162805	0.000841233	0.00145555	0.0194932	0.00017159	7.78e-05	0.0174263	0.00131472	0.000772744	0.00017923	5.62e-05	0.00929334	0.000134951	0.00071398	0.000147468	0.00531233	0.000887774	0.00137096	0.00178492	0.00309882
C-308	8.13e-05	0.000502838	0.00139219	0.000676148	0.000524794	0.000895499	0.00338764	0.0005008	0.00048003	0.00102991	0.00074299	4.74e-05	3.69e-05	0.00180331	0.000332083	7.86e-05	0.00015111	0.0023864	0.00142932	0.000102696	0.00113434	1.63e-05	0.00016665	0.000139919	0.00179553	6.02e-05	0.000513208	2.8e-05	0.000966538	8.66e-05	0.00015631	0.000792741	0.0184502	0.000236077	2.16e-05	0.00578502	0.000403213	0.000420669	9.17e-05	1.86e-05	0.00149179	0.000185443	0.000956928	0.000236168	0.00175639	0.000377729	0.000339229	0.00190072	0.00176971
C-329	7.92e-05	0.000842597	0.00186711	0.0067727	0.00019142	0.00161503	0.0124649	0.000206467	0.000508143	0.00134705	0.00101558	2.95e-06	2.51e-05	0.00077167	0.000380952	3.66e-05	4.68e-05	0.000290523	0.000814805	0.000246504	0.00303001	1.12e-05	5.61e-05	0.000114917	0.00200522	3.22e-06	0.00025267	2.63e-05	0.000555733	6.65e-05	0.000117425	0.00386434	0.0187617	6.43e-05	2.44e-05	0.0182503	0.00041559	3.95e-06	0.00021045	7.33e-05	0.00121724	4.8e-05	0.00112468	0.000526819	0.000750103	0.00169062	0.00144161	0.00329265	0.00219272
C-331	0.000165745	0.000606918	0.000692878	0.00103245	0.00145995	0.000549475	0.00642319	0.000418008	0.000529484	0.00160494	0.000439615	5.64e-06	1.85e-06	0.00217371	0.000186529	3.73e-05	0.000106744	0.000341338	0.000481566	0.000182678	0.00076499	1.62e-05	8.19e-05	0.000201757	0.00104312	2.28e-05	0.000449757	1.95e-05	0.000964984	8.2e-05	0.000214369	0.00243088	0.0194553	0.000120561	2.58e-05	0.0126238	0.00114413	2.08e-05	3.67e-05	1.29e-05	0.000366356	9.94e-05	0.000634758	0.000430002	0.00120913	0.000469483	0.000362093	0.00140372	0.00153874
C-333	0.000397464	0.0043841	0.00577991	0.00194925	0.00684686	0.00373935	0.0184565	0.00291816	0.00202162	0.00419435	0.0028852	7.56e-05	0.000201889	0.00503008	0.000823406	0.00011394	0.000962845	0.000339961	0.00327979	0.000386368	0.00172115	2.48e-05	0.000146026	0.0135756	0.00179557	0.000152312	0.000247366	7.34e-05	0.00208634	0.000288635	0.00221181	0.00185351	0.0180505	0.000239878	0.000123642	0.018593	0.000816327	3.55e-06	6.12e-05	1.49e-05	0.00419607	0.00183815	0.0186697	0.000989055	0.0129714	0.00068424	0.000736086	0.0168136	0.00470895
C-335	7.2e-05	0.000503644	0.00114636	0.00151754	0.000220755	0.000793171	0.00463765	0.000235196	0.00040704	0.000482763	0.000273526	6.81e-07	2.11e-05	0.000787411	8.38e-05	4.96e-05	0.000184951	9.12e-05	0.000551704	5.86e-05	0.00117056	9.22e-06	5.95e-05	0.000134961	0.000983711	2.71e-05	0.000121372	3.51e-05	0.000618008	7.24e-05	0.000237721	0.000251311	0.0188324	3.37e-05	5.06e-05	0.00883218	0.000124606	0.000302918	2.75e-05	8.94e-06	0.00226322	4.79e-05	0.000259851	0.000137174	0.00154154	0.000196214	0.000187192	0.00101997	0.000758132
C-336	0.000222817	0.00044622	0.00150472	0.000606099	0.000949954	0.000679267	0.00615351	0.000314892	0.000395213	0.00114343	0.00115773	0	2.42e-05	0.00150258	0.000222318	6.23e-05	0.00027139	0.000279833	0.00200561	0.000213641	0.00118376	1.13e-05	0.000100753	0.000203	0.00140339	2.28e-05	0.000299239	3.51e-05	0.00085949	0.000118165	0.000524752	0.0160877	0.0189753	0.000124673	4.52e-05	0.0101342	0.000905103	8.59e-06	7.28e-05	2.16e-05	0.000788873	0.000258668	0.00493949	0.000452727	0.0029845	0.000756451	0.000746162	0.00295829	0.00294862
C-337	6.13e-05	0.000357139	0.00223244	0.000298469	0.000304604	0.000735568	0.00195724	0.000385216	0.000571942	0.00177585	0.000809196	2.4e-06	1e-05	0.00347342	0.000332483	5.27e-05	0.000124352	0.000370739	0.000710998	0.000651734	0.00137396	1.19e-05	0.000101082	0.000149687	0.00217753	2.17e-05	0.000653147	2.05e-05	0.000667115	6.85e-05	0.000235416	0.00393803	0.0185874	0.000132637	1.91e-05	0.0176854	0.00177568	2.94e-06	0.000105041	2.75e-05	0.000880166	3.46e-05	0.000314868	0.000753947	0.00124505	0.000882145	0.000661828	0.000858253	0.00232656
C-338	0.000176979	0.000978287	0.00202154	0.0023678	0.000893084	0.00203142	0.0147906	0.000440722	0.000761788	0.00116986	0.0021347	0	3.46e-05	0.00108031	0.000317943	8.07e-05	0.000248297	0.000497661	0.0016606	0.000383646	0.00430413	1.8e-05	0.000131789	0.00049295	0.00119109	3.64e-05	0.00063334	4.15e-05	0.00167574	0.000103525	0.000143402	0.00259312	0.0181818	0.000167914	5.21e-05	0.0142841	0.000317259	4.16e-06	8.51e-05	2e-05	0.00219364	0.000188153	0.00132986	0.000536086	0.00504163	0.00102832	0.000880623	0.00225203	0.0021111
C-339	0.000237634	0.00206339	0.00372412	0.0012678	0.00230772	0.00127222	0.00957045	0.000921869	0.000723057	0.00257578	0.00558615	0.000102591	4.49e-05	0.00670327	0.000934641	0.000104389	0.000528093	0.00528036	0.0011848	0.000947382	0.00778219	0.000101708	0.00127597	0.00214709	0.0133858	4.98e-05	0.00941601	3.23e-05	0.00150954	0.000400304	0.000431431	0.0129562	0.0181159	0.000151127	7.71e-05	0.0210337	0.0202118	1.61e-06	0.000352872	6.57e-05	0.00223612	0.000158349	0.00342294	0.00384295	0.0025585	0.00271647	0.00187758	0.00271089	0.00725142
C-341	8.82e-05	0.000382592	0.000589214	0.00411366	0.00195038	0.000568959	0.00487412	0.000418203	0.00035907	0.000515944	0.000201751	8.76e-06	4.84e-06	0.00122862	0.000154231	2.34e-05	0.000222511	0.000389691	0.000842256	5.88e-05	0.000711636	1.1e-05	4.78e-05	0.000155924	0.00312914	7.13e-07	0.000596817	4.51e-05	0.00187646	8.28e-05	0.000104395	0.000170566	0.0194553	0.000365248	2.09e-05	0.0190505	0.00040163	0.000327589	2.06e-05	5.97e-06	0.00116194	7.97e-05	0.000219541	0.00117317	0.00116619	0.000293731	0.000217016	0.00102954	0.001025
C-343	0.000171682	0.00204274	0.00050747	0.000359327	0.000526676	0.000299751	0.00812592	0.000866349	0.000249234	0.000775099	0.00458283	2.07e-05	2.57e-05	0.00259874	0.000279707	8.43e-05	0.000193935	0.000312556	0.00261909	0.000439311	0.00630535	2.26e-05	0.000264973	0.000403722	0.00232706	6.85e-05	0.00067781	2.56e-05	0.000798303	9.12e-05	0.000268077	0.0081492	0.0187617	0.000203804	4.75e-05	0.0175213	0.000322676	5.42e-06	0.000237268	7.65e-05	0.00202451	0.000190077	0.00513883	0.000733667	0.00203849	0.0135674	0.000664894	0.00487662	0.0042949
C-346	0.000113427	0.00114252	0.00790514	0.000398595	0.000872486	0.00182687	0.00373446	0.000794298	0.00146403	0.00227684	0.00182339	8.5e-06	1.56e-05	0.0174143	0.000628822	7.39e-05	0.00019272	0.000384278	0.000823697	0.000496259	0.00350817	2.24e-05	0.000113455	0.0024972	0.00372556	6.11e-05	0.000528634	6.06e-05	0.00124854	6.47e-05	0.000373506	0.00335786	0.0184502	7e-05	2.72e-05	0.0160044	0.00259461	4.65e-06	0.000198078	4.81e-05	0.00135916	0.000154363	0.013885	0.000908235	0.00231763	0.0029936	0.00113064	0.00632592	0.00704011
C-347	0.000126854	0.00075134	0.00129024	0.000773158	0.000801848	0.00104538	0.00612125	0.000371589	0.000679285	0.00142099	0.00133042	0	1e-05	0.00161171	0.000371589	6.71e-05	0.000134146	0.000296203	0.000554952	0.000195668	0.000428128	1.01e-05	0.000129105	0.00014387	0.000812591	2.32e-05	0.000305356	2.49e-05	0.000557623	7.25e-05	0.00020164	0.0046093	0.0189753	9.18e-05	4.05e-05	0.00925701	0.00060582	2.85e-05	0.000108938	3.2e-05	0.00102608	7.77e-05	0.000255118	9.4e-05	0.00108034	0.00054865	0.000306286	0.000677575	0.00158818
C-348	5.47e-05	0.000344097	0.000791463	0.000915747	0.000240282	0.000516186	0.00580911	0.000155055	0.000235675	0.000622835	0.000863335	0	1.38e-05	0.000655024	0.000168219	5.67e-05	0.000154864	0.000195202	0.001814	4.23e-05	0.00083161	1.64e-05	0.000120577	0.000122866	0.000752325	3.05e-05	0.000216897	4.54e-05	0.000926049	8.41e-05	0.000148159	0.00264471	0.0181159	6.35e-05	4.18e-05	0.00689272	0.000312671	0.000327716	3.73e-05	1.79e-05	0.00138503	7.12e-05	0.000269472	0.000257643	0.00125755	0.000226518	0.00027664	0.000641451	0.00121825
C-351	0.000174528	0.000514955	0.00155544	0.000266354	0.000424397	0.00052346	0.00473765	0.00065008	0.000400458	0.00068574	0.00115022	1.82e-06	2.25e-05	0.00162528	0.000642781	5.12e-05	4.01e-05	0.000241178	0.00086732	0.000363561	0.00582115	1.66e-05	4.51e-05	0.000110599	0.00189695	1.52e-05	0.000222343	1.43e-05	0.00037219	6.83e-05	8.45e-05	0.0057297	0.0198807	0.000148486	2.3e-05	0.0211443	0.000523182	5.38e-06	0.0001003	3.07e-05	0.00200798	3.43e-05	0.000341911	0.000469521	0.000955558	0.000709957	0.000637987	0.00208258	0.00201844
C-357	0.000168954	0.00125514	0.000989093	0.000776999	0.00033519	0.000614883	0.00147198	0.000380704	0.00043254	0.00150285	0.000974131	0	4.29e-06	0.00368975	0.000481745	4.91e-05	0.000104245	0.000287445	0.0015857	0.000235494	0.00248522	1.89e-05	0.000131421	0.000189923	0.00236475	2.21e-05	0.000342399	1.83e-05	0.000605728	6.45e-05	0.00021833	0.00566834	0.0187617	8.4e-05	3.11e-05	0.0125983	0.000340053	1.38e-05	0.000206372	5.9e-05	0.0024567	3.79e-05	0.000248739	0.000159428	0.000591024	0.00138862	0.00148031	0.00158318	0.00232854
C-358	0.000153489	0.000985912	0.00117761	0.000712654	0.00852316	0.00088238	0.00503879	0.000226279	0.000464631	0.00191348	0.00096705	3.93e-05	8.84e-06	0.00139335	0.000337273	5.02e-05	0.000198995	0.000454768	0.0103499	0.000257246	0.00233587	1.81e-05	9.2e-05	0.000372243	0.00177997	2.44e-05	0.000651233	4.3e-05	0.000902523	9.76e-05	0.000184776	0.0138296	0.0191939	0.000206745	6.34e-05	0.0199706	0.000481059	7.14e-06	5.95e-05	1.64e-05	0.000551383	0.000110161	0.00102111	0.00191402	0.00227663	0.000875975	0.000556411	0.00159254	0.00341792
C-359	0.000122281	0.000651204	0.00136169	0.000570716	0.000485104	0.000643995	0.00467168	0.000189722	0.000292373	0.000719687	0.00097128	3.04e-06	2.29e-06	0.00135364	0.000225349	4.21e-05	0.000118409	0.000199999	0.00425664	0.000264759	0.00126717	1.14e-05	6.72e-05	0.000274857	0.000853408	0.000149865	0.000233481	3e-05	0.000512301	7.18e-05	0.000350282	0.00213338	0.0196464	8.78e-05	6.23e-05	0.0107801	0.000103366	8.73e-06	9.65e-05	3.03e-05	0.000674439	9.66e-05	0.000636429	0.000281202	0.00132663	0.00053348	0.000388113	0.000597376	0.000922129
C-361	0.000417147	0.00117093	0.00636722	0.000525564	0.00962959	0.00244112	0.0105176	0.000630596	0.000710733	0.00163764	0.00431434	2.47e-05	8.35e-05	0.00284585	0.000458125	0.000173756	0.000430378	0.000510296	0.00268611	0.000183382	0.00269068	1.67e-05	0.000188837	0.00133233	0.0022182	4.4e-05	0.000621315	7.1e-05	0.00155396	0.000123028	9.35e-05	0	0.0195695	0.000183099	5.14e-05	0.0212421	0.00279854	3.14e-06	0.000124125	3.94e-05	0.00228341	0.00280089	0.00868594	0.000582281	0.0104706	0.0128436	0.00120259	0.00485863	0.00715586
C-362	0	0.000282323	0.00018937	0.000635713	0.000322912	0.0002132	0.00298288	0.000436906	0.000355699	0.000170329	0.00067988	0	1.86e-05	0.00084097	0.000132359	3.91e-05	6.73e-05	0.000159287	0.000465637	0.00295643	0.00243965	2.61e-05	5.84e-05	0.000193624	0.00232974	1.2e-05	0.000161822	1.97e-05	0.000470369	7.44e-05	0.000208355	0.00173422	0.0189036	0.000102811	2.37e-05	0.0184016	0.000464736	7.04e-06	8.11e-05	1.22e-05	0.000655261	4.79e-05	0.000235537	0.000809225	0.000597518	0.000670443	0.000532761	0.00205426	0.00264456
C-363	8.96e-05	0.000374813	0.000399639	0.000998004	0.000589052	0.000341872	0.00660313	0.00111995	0.000238106	0.000706293	0.000674549	7.4e-05	2.09e-05	0.0011201	0.000197319	3.83e-05	0.000173242	0.00115445	0.00271188	0.000196211	0.00332777	2.01e-05	0.000215976	0.000312674	0.00382033	5.62e-05	0.00107057	2.77e-05	0.00215772	0.000197019	0.000534938	0.0162477	0.0196078	0.000227206	6.39e-05	0.0147267	0.00188356	0.000293088	1.7e-05	4.13e-06	0.00125198	0.000226068	0.00127564	0.000991505	0.00236588	0.000124548	0.000529068	0.00125818	0.00493405
C-364	8.11e-06	0.000521221	0.000241567	0.000280688	0.0011713	0.00024335	0.00422323	0.00054413	0.00019595	0.000310008	0.00137588	3.75e-05	3.31e-05	0.000842123	0.000129263	6.65e-05	0.000234439	0.000764139	0.000656578	0.000850401	0.00235002	2.58e-05	0.00015292	0.000269219	0.00177557	4.99e-05	0.00092551	3.51e-05	0.00145768	0.000123888	0.000469826	0.00168496	0.019084	0.000182124	8e-05	0.0122492	0.000276233	3.51e-06	0.000109085	2.38e-05	0.000618003	9.86e-05	0.00160227	0.000806767	0.00192073	0.000838932	0.000926373	0.00302606	0.00334866
C-366	3.57e-05	0.000613408	0.000106407	0.00460307	0.000123521	0.000198311	0.00970726	0.000362533	0.000155276	0.000254098	0.000288798	3.28e-06	1.42e-05	0.000351031	9.48e-05	4.2e-05	3.93e-05	3.6e-05	0.000118548	0.000929794	0.00334281	2.27e-05	5.4e-05	0.000319331	0.00185623	4.33e-06	6.25e-05	2.07e-05	0.000247264	7.3e-05	0.000251903	0.00037973	0.018622	0.000178446	1.16e-05	0.0180213	0.000433739	3.86e-06	6.13e-05	2.28e-05	0.000633828	1.54e-05	0.000198089	0.000266906	0.000622021	0.000605796	0.000667056	0.0026373	0.00184028
C-367	5.43e-05	0.000393687	0.00113119	0.000302886	0.00105287	0.000718461	0.00470733	0.000500542	0.000534244	0.000742496	0.00168329	8.59e-06	1.86e-05	0.00298157	0.000266455	5.71e-05	0.000184216	0.000190544	0.00101151	0.000549833	0.00370015	1.87e-05	6.01e-05	0.000342161	0.00199212	3.98e-05	0.00020622	3.92e-05	0.000444343	0.00010221	0.000245641	0.000893968	0.0192308	0.000277224	5.64e-05	0.0167018	0.000314816	6.3e-06	0.000113328	1.84e-05	0.00054574	8.45e-05	0.000996382	0.00114568	0.00159928	0.000797448	0.00054841	0.00182329	0.00272902
C-368	9.44e-05	0.00110159	0.00188003	0.000608995	0.000474684	0.000992838	0.00441891	0.000299976	0.00066133	0.00184687	0.00211848	2.04e-06	1.86e-05	0.00180645	0.000473443	7.66e-05	6.54e-05	0.00069827	0.000473531	0.00060403	0.00694206	3.77e-05	0.000302163	0.000266967	0.00275321	4.41e-05	0.000588811	2.1e-05	0.0007496	6.76e-05	0.00013239	0.00108465	0.0197239	0.000147195	5.67e-05	0.0193341	0.000180441	1.95e-06	0.000375657	7.75e-05	0.00188816	8.2e-05	0.000412301	0.000165458	0.00123288	0.00170949	0.0017037	0.00323144	0.00405253
C-369	0.000186683	0.00146119	0.00226383	0.000321274	0.000664628	0.00069162	0.00534496	0.000417009	0.000467728	0.000951164	0.00350436	0	2.63e-05	0.00337471	0.000263051	4.55e-05	0.000110253	0.000124496	0.000749445	0.000230082	0.0015533	1.13e-05	6.48e-05	0.00051857	0.00156751	4.18e-05	0.000154781	3.59e-05	0.00019751	6.31e-05	0.000430581	0.00798472	0.0185185	0.000130962	3.41e-05	0.0207887	0.000221085	4.67e-06	6e-05	2.92e-05	0.00121916	0.000113608	0.000617508	0.00102576	0.000948327	0.000918225	0.000768659	0.00118091	0.00358418
C-370	0.000240002	0.00130368	0.00146607	0.00083431	0.000796445	0.0010863	0.00707643	0.000890166	0.000798741	0.00142182	0.00172074	5.39e-06	2.36e-05	0.00422196	0.000319885	4.47e-05	6.95e-05	0.000312318	0.00124568	0.000235438	0.00215124	1.56e-05	9.93e-05	0.000550995	0.00179653	2.27e-05	0.000319179	2.42e-05	0.000495463	6.54e-05	6.43e-05	0.00561298	0.0181159	0.000167628	1.71e-05	0.0176553	0.00149266	3.3e-06	5.63e-05	1.68e-05	0.00209875	0.000148253	0.00515647	0.00093554	0.00204692	0.000713352	0.000612681	0.00357365	0.0032454
C-371	0.000205347	0.00228491	0.002887	0.00121286	0.00103596	0.000840642	0.00486271	0.000424679	0.000496013	0.00435406	0.00242312	2.71e-05	1.75e-05	0.00855871	0.00048115	0.000100965	0.0021645	0.00134697	0.00485612	0.000324185	0.00537797	2.39e-05	0.000103097	0.00117323	0.00466965	6.45e-05	0.001308	3.6e-05	0.00118088	0.00011081	0.000303804	0.00827823	0.0189394	0.00022554	5.78e-05	0.0178522	0.0014633	4.95e-06	0.000154865	4.45e-05	0.00127382	0.000239807	0.00441169	0.000803956	0.00221034	0.00137488	0.00114952	0.00328948	0.00477143
C-374	0.000223419	0.00204267	0.00263377	0.000918084	0.0366996	0.00313488	0.0139097	0.00304372	0.000979961	0.00256434	0.0033212	0.000127339	7.7e-05	0.00836077	0.000613626	0.000246328	0.00105763	0.00209288	0.00163801	0.00587468	0.0016317	5.56e-05	0.00017653	0.00721605	0.00407437	0.000138152	0.00176958	4.07e-05	0.00204733	0.000198208	0.00437573	0.0025455	0.0348432	0.000502773	7.46e-05	0.0364207	0.00143681	9.31e-06	0.000156511	3.06e-05	0.00122474	0.000612235	0.00450574	0.0070225	0.00612438	0.00152481	0.00109205	0.00425396	0.00452619
C-378	3.15e-05	0.000499897	0.00177026	0.00107495	0.000917911	0.000801511	0.00401629	0.000562563	0.000537695	0.00186386	0.00274019	1.09e-05	1.9e-05	0.00711156	0.000499511	7.01e-05	7.03e-05	0.000301201	0.0019879	0.00104468	0.00232618	2.11e-05	0.000163241	0.00027046	0.0023921	3e-05	0.000312173	3.12e-05	0.000423142	9.5e-05	0.000207711	0.00365141	0.0181488	0.000152075	2.92e-05	0.0162852	0.00119758	4.58e-06	0.000162579	1.62e-05	0.00119187	0.000104352	0.00110709	0.00164551	0.00182314	0.00106938	0.00123521	0.001849	0.0034424
C-379	0.00011484	0.000514696	0.00229368	0.0061296	0.000867772	0.000404714	0.0187514	0.000923412	0.000675075	0.00124318	0.00481412	1.25e-05	5.77e-05	0.00187956	0.000361107	0.000125052	0.000169845	8.15e-05	0.00177658	0.000752877	0.00306676	6.77e-05	0.000245301	0.00498981	0.00254878	8.11e-05	0.000171584	4.49e-05	0.000511219	0.000102862	0.00161066	0.0075363	0.0184502	0.000274887	7.58e-05	0.0187968	0.000217316	5.35e-06	0.000281511	4.47e-05	0.00209124	0.000127094	0.00118524	0.0002721	0.00564339	0.00162026	0.00144757	0.00199884	0.00538514
C-406	3.01e-05	0.000953006	0.000325533	0.00113876	0.000359327	0.000258916	0.00613967	0.000687101	0.00016343	0.00033028	0.00215163	3.06e-05	6.3e-05	0.000741273	0.000130166	0.000105041	2.81e-05	0.000369236	0.00023907	0.000335883	0.00558206	3.73e-05	0.000219695	0.000316597	0.00297246	1.96e-05	0.000331312	2.73e-05	0.000453546	0.000116512	0.00024022	0.00394476	0.0193798	0.0006063	4.58e-05	0.0200659	0.000326093	9.14e-06	8.7e-05	2.95e-05	0.000737793	3.44e-05	0.000326565	0.000542397	0.000612522	0.000697865	0.000477461	0.000663067	0.00164123
C-410	0.000147325	0.00176885	0.00284908	0.000493943	0.00182852	0.00178616	0.0123454	0.00124327	0.00053501	0.0100335	0.0089106	1.65e-05	3.19e-05	0.00971938	0.000439691	8.05e-05	8.42e-05	0.00147192	0.00659072	0.0010884	0.00474352	3.16e-05	0.00014994	0.000952233	0.00682835	4.56e-05	0.00153988	2.54e-05	0.00120257	0.00015458	0.000734045	0.018488	0.0187266	0.000218446	9.89e-05	0.0251533	0.00222733	8.03e-06	0.000309014	9.44e-05	0.00146419	0.000108726	0.00435238	0.00148875	0.00215105	0.0021	0.00180756	0.00213499	0.00439389
C-415	9.16e-05	0.000495902	0.00142208	0.00112215	0.000309616	0.000875523	0.00354417	0.000438354	0.000479434	0.00132867	0.00247045	2.97e-05	3.1e-05	0.000859966	0.000345378	6.33e-05	0.000167995	0.000380776	0.000136881	0.000334257	0.00382082	2.42e-05	0.000840642	0.000198257	0.00101617	9.81e-06	0.000309434	2.22e-05	0.000415596	0.000101028	0.000170638	0.0078592	0.018797	0.00044914	4.99e-05	0.0145783	0.000379986	4.56e-06	8.36e-05	2.79e-05	0.00110049	2.57e-05	0.000220711	0.000556762	0.000938692	0.000996483	0.000542663	0.000600606	0.00151365
S-259	0.000267789	0.00235623	0.0025948	0.000734917	0.00121014	0.000954733	0.0150722	0.000473982	0.000373071	0.00171952	0.00298336	7.95e-06	2.3e-05	0.00462125	0.000408663	7.58e-05	4.87e-05	0.000365287	0.000340102	0.000217644	0.00253464	2.09e-05	4.61e-05	0.000443861	0.00193629	5.89e-05	0.000476492	3.39e-05	0.000508587	7.26e-05	0.000863101	0.000488422	0.0183824	0.000172321	8.25e-05	0.01919	7.97e-05	5.1e-06	8.95e-05	2.91e-05	0.00116406	0.000135544	0.000525481	0.00193727	0.00146222	0.0017638	0.00102987	0.00125092	0.00247505
S-266	0.000195605	0.00360306	0.00192427	0.00325384	0.0174885	0.00179695	0.01076	0.00113236	0.000758729	0.002869	0.00321125	9.84e-06	6.47e-05	0.00296614	0.000364249	0.000106034	0.000190414	0.000411545	0.00166849	0.000511986	0.00153662	3.42e-05	0.000242785	0.000978454	0.00306649	0.000136321	0.000446421	1.95e-05	0.000536594	0.000101789	0.000438505	0.00208253	0.0189394	0.000227871	9.13e-05	0.0193806	0.00187953	4.19e-06	9.59e-05	3.69e-05	0.000885585	0.000101961	0.00179813	0.00142938	0.0021676	0.000902994	0.00057061	0.00223962	0.00295461
S-274	5.52e-05	0.000645027	0.00242318	0.00296364	0.000279025	0.000917644	0.00517683	0.000249924	0.000465556	0.000451643	0.00129895	0	1.24e-05	0.000477096	0.00038297	7.64e-05	0.000157697	0.000298722	0.00048202	0.000129842	0.00316251	9.97e-06	9.23e-05	0.000223879	0.00104084	2.67e-05	0.000163304	4.97e-05	0.000480181	7.26e-05	8.22e-05	0	0.0197628	0.000182497	5.27e-05	0.00881922	5.84e-05	3.11e-06	0.00012557	4.46e-05	0.00339069	0.000121773	0.000529394	8.3e-05	0.00263273	0.00162627	0.000909605	0.00154846	0.00370635
S-280	0.000122882	0.0126063	0.0122276	0.000532912	0.00789706	0.019645	0.017753	0.00223006	0.00553667	0.0144295	0.00768601	0.000183672	0.00163442	0.0116702	0.00144632	0.000640485	0.000152048	0.00137994	0.00197241	0.000910387	0.0102899	9.35e-05	0.000271205	0.0255204	0.00750081	0.000233808	0.00121247	0.0151025	0.0252604	0.0069013	0.00196932	0.0117663	0.0192678	0.000182293	0.000265543	0.0238934	0.00214167	1.2e-05	0.000522185	0.000143704	0.00213444	0.001495	0.00510786	0.00173689	0.00966617	0.00317661	0.00173	0.0253782	0.01793
S-283	1.54e-06	0.00076338	0.000227888	0.000264902	0.00060403	0.000236798	0.0160017	0.000398754	0.000152373	0.000390152	0.00121053	9.95e-06	2.48e-05	0.000298442	8.62e-05	8.13e-05	0.000264146	0.000425205	0.00214662	0.00026804	0.00317437	2.97e-05	0.000196617	0.000239516	0.00118242	2.67e-05	0.000287879	3.27e-05	0.00154791	0.000109923	0.000625353	0.000827966	0.0185185	0.000321727	3.63e-05	0.00920704	6.83e-05	0.000257897	6e-05	1.34e-05	0.00672782	9.79e-05	0.000691564	0.000669821	0.00773716	0.000587245	0.000661471	0.00163352	0.0024171
S-296	5.46e-05	0.000313551	0.00344749	0.000331983	0.000225776	0.000687111	0.00240382	0.000560414	0.000439622	0.00458173	0.00128156	0	8.29e-06	0.00508384	0.000415374	6.05e-05	9.13e-05	0.000600618	0.00394753	0.000983424	0.00558538	2.34e-05	8.31e-05	0.00024221	0.00360201	6.69e-05	0.000411348	3.5e-05	0.00115146	6.41e-05	0.000151571	0.00100526	0.0194553	0.000108802	3.27e-05	0.0201204	0.000265473	7.34e-06	0.000547977	0.000145904	0.001337	5.22e-05	0.000635722	0.00047249	0.00198516	0.00917266	0.00134469	0.00464174	0.00905166
S-301	0.000230747	0.00323112	0.00328657	0.00169124	0.00120835	0.00132415	0.0114832	0.00221454	0.000640008	0.00629851	0.0124913	2.57e-05	3.31e-05	0.00687707	0.000746503	0.000204496	0.000134384	0.0011024	0.00258834	0.00101679	0.0109408	4.17e-05	0.000282505	0.000900463	0.00493819	4.97e-05	0.000503211	2.75e-05	0.000876626	0.000109891	0.000188197	0.00289778	0.0189036	0.000562477	7.92e-05	0.0203391	0.000937858	7.72e-06	0.000260515	4.5e-05	0.00393921	0.000280032	0.00314453	0.00213698	0.00446352	0.00101569	0.0013622	0.0057422	0.00780992
S-305	6.21e-05	0.00114981	0.00144069	0.00301472	0.00041506	0.00106411	0.00408025	0.00063132	0.000651521	0.00520469	0.00198439	9.59e-06	4.87e-05	0.00175079	0.000769478	8.42e-05	0.000384993	0.00223397	0.000770261	0.000126569	0.00577494	5.08e-05	0.000181613	0.00051262	0.00381971	3.94e-05	0.00154365	5.28e-05	0.00112323	0.000131346	0.000114159	0.0029071	0.0195695	0.000137727	3.35e-05	0.0168429	0.000127587	0.000561165	0.000117604	3.37e-05	0.00689911	0.000110362	0.000856193	0.000246366	0.00120067	0.00064557	0.000930068	0.00243903	0.00565596
S-306	4.4e-05	0.00115272	0.000972369	0.0023901	0.00034899	0.00080423	0.00536077	0.000622648	0.000512279	0.000950687	0.0010539	0	1.55e-05	0.00253404	0.000481275	8.09e-05	0.000143857	0.000374734	0.000509006	0.000314948	0.00144047	1.35e-05	9.11e-05	0.000211533	0.00122624	2.54e-05	0.000221615	1.79e-05	0.000440336	5.48e-05	0.000292739	9.78e-05	0.0188679	4.08e-05	3.85e-05	0.010579	0.000218692	7.74e-06	7.42e-05	1.81e-05	0.000950745	3.46e-05	0.000218079	0.000148357	0.00176532	0.000642811	0.000530747	0.000710867	0.00186759
S-307	1.1e-05	0.0002387	0.000895813	0.000145512	0.000223038	0.000455647	0.00307354	0.000144312	0.000235639	0.000279533	0.000273532	0	0	0.000717989	9.07e-05	1e-05	0.000141432	0.000191746	0.000238159	2.95e-05	0.00150345	1.14e-05	4.57e-05	8.48e-05	0.000718799	1.35e-06	0.00012514	2.26e-05	0.000472749	6.72e-05	0.000271912	0	0.0183824	7.66e-05	1.85e-05	0.0120363	2.55e-05	0.000218778	2.03e-05	7.44e-06	0.00221844	3.54e-05	0.000253521	0.000236179	0.00145434	0.000200386	0.000285383	0.000661614	0.000960349
S-310	0	0.000653798	6.87e-05	0.000887446	0.000364975	0.000161834	0.0141823	0.000284456	9.83e-05	0.000171689	0.000851746	2.65e-05	2.7e-05	0.000419293	3.72e-05	6.93e-05	0.000633262	0.00053749	0.000905474	0.000101349	0.00105943	2.26e-05	8.75e-05	0.000635711	0.00155107	4.96e-05	0.000299179	2.38e-05	0.00121944	8.14e-05	0.00110634	0.000985432	0.0194553	0.000133244	4.59e-05	0.00977401	0.000286433	0.000199984	3.5e-05	1.01e-05	0.0037868	0.000100789	0.00218997	0.000563041	0.00158825	0.000319449	0.000303752	0.00174306	0.00216462
S-312	3.07e-05	0.000297362	0.00144936	0.000260987	0.000341238	0.000591317	0.00287436	0.000217828	0.000197803	0.000715324	0.000228797	0	0	0.00167173	0.00026828	3.39e-05	7.22e-05	0.000409414	0.00106735	0.000294642	0.000719599	4.42e-06	7.06e-05	0.000104222	0.00136746	4.17e-05	0.00020399	1.56e-05	0.000296137	5.9e-05	0.000379257	0.00298767	0.0193798	9.03e-05	3.16e-05	0.0185554	0.000192094	2.71e-05	0.000114772	3.19e-05	0.000945885	5.62e-05	0.00030585	0.000195771	0.001556	0.000810281	0.000471015	0.00105883	0.00272273
S-317	6.36e-05	0.000628473	0.00246969	0.00106402	0.000417313	0.000993501	0.0106986	0.000194297	0.000429696	0.000760561	0.000321672	2.99e-06	7.11e-06	0.00126945	0.000132088	4.16e-05	0.000147399	0.000624491	0.00271369	6.06e-05	0.00280638	3.07e-05	3.69e-05	0.000194853	0.0028141	3.86e-06	0.000583419	7.26e-05	0.00158444	8.47e-05	0.000447876	0	0.0191571	9.21e-05	1.6e-05	0.0199514	0.00012597	0.000281419	4.07e-05	1.04e-05	0.00288928	6.63e-05	0.000424251	0.00201086	0.00249126	0.000408267	0.000409467	0.000887614	0.00276633
S-320	1.97e-05	0.00178914	0.000529624	0.00078049	0.00123227	0.000174998	0.0188768	0.000657205	0.000288409	0.000126688	0.000720855	3.31e-05	1.58e-05	0.000582146	0.000103481	4.63e-05	0.000454537	0.000325953	0.000808912	0.000128919	0.000901655	1.91e-05	0.000108502	0.012666	0.00147337	6.67e-05	0.000159434	6.79e-05	0.00105264	9.9e-05	0.00651007	0.00087485	0.0188324	0.000167383	8.42e-05	0.00988881	8.22e-05	0.000319984	3.74e-05	4.26e-05	0.0186341	7.19e-05	0.000828214	0.000263808	0.00370974	0.000414539	0.000508398	0.00283634	0.00466746
S-326	2.83e-06	0.000320532	0.000160708	0.000278799	0.000136245	0.000183544	0.0132783	0.00022993	0.000231015	0.000117434	0.0002166	0	4.34e-06	0.000224935	6.25e-05	2.13e-05	9.56e-05	0.000122515	0.000293785	0.000353187	0.00242721	2.54e-05	4.4e-05	0.00028839	0.0019643	1.07e-05	8.3e-05	2.07e-05	0.000346194	6.47e-05	0.00137301	0.000250739	0.0193424	0.000180947	3.1e-05	0.0174737	7.56e-05	0.00031194	1.62e-05	NA	0.00107729	2.56e-05	0.000160794	0.000139157	0.000829946	0.000201585	0.000117919	0.000678001	0.000975754
S-329	2.33e-05	0.000491904	0.00318298	0.000353633	0.000748525	0.0014717	0.00675223	0.000204072	0.000450212	0.00251005	0.000790332	8.58e-06	2.12e-05	0.0040904	0.00045079	6.36e-05	0.000140726	0.000645709	0.000624603	0.000429597	0.00798795	2.18e-05	0.000105241	0.000664938	0.00414517	9.18e-06	0.000342806	3.77e-05	0.000691443	9.99e-05	0.000134114	0.000272183	0.0192678	0.000103768	3.64e-05	0.0195984	0.000385595	6.58e-06	0.000456651	0.000112315	0.00240209	8.81e-05	0.00502466	0.000856393	0.00194911	0.00219741	0.00144673	0.00483869	0.00467311
S-331	0.000217797	0.000572353	0.000973224	0.0033914	0.00762616	0.000973885	0.0150081	0.000738943	0.000752148	0.000353146	0.000587743	7.96e-05	5.79e-05	0.00169318	0.000371845	8.41e-05	0.000455356	0.000110725	0.00257021	9.9e-05	0.000478082	3.16e-05	0.000119211	0.00170296	0.000983033	0.000122462	5.02e-05	8.19e-05	0.000917732	0.000194668	0.00318678	0.00123808	0.0192308	0.000130431	0.000124476	0.0109154	3.68e-05	2.77e-05	2.82e-05	5.12e-06	0.00117629	0.000446582	0.0160014	0.000248376	0.00738734	0.000346415	0.000295411	0.00588249	0.00179481
S-333	5.18e-05	0.0102704	0.000931526	0.000299215	0.000432471	0.000270258	0.0179803	0.00204951	0.000155726	0.000791842	0.00900847	2.82e-05	7.95e-05	0.00112296	0.00015838	0.000207301	9.94e-05	0.00503879	0.00401556	0.00150536	0.016102	6.88e-05	0.000288334	0.00549533	0.0078015	8.64e-05	0.00140053	3.1e-05	0.00126969	0.000108899	0.00108767	0.00279157	0.0199601	0.000137915	7.31e-05	0.0200896	0.00118518	9.82e-06	0.000310568	7.09e-05	0.0106743	0.000249911	0.0107586	0.00172213	0.0013215	0.00165711	0.00273109	0.00575467	0.0092452
S-335	7.45e-05	0.000846592	0.00114964	0.000572371	0.000318427	0.000970421	0.00220993	0.000516235	0.000862679	0.00119013	0.000362565	2.7e-07	2.57e-05	0.00279977	0.000309775	9.58e-05	0.000258878	0.000523941	0.000199769	0.000104261	0.00269757	1.63e-05	8.02e-05	0.000247827	0.00289592	3.42e-05	0.000363308	0.000104396	0.00152937	0.000222514	0.0003043	0	0.0188679	6.31e-05	5.11e-05	0.0182491	5.38e-05	0.000718032	7.31e-05	2.28e-05	0.00442161	7.48e-05	0.000565409	0.000209401	0.00086616	0.000274424	0.000325693	0.00123248	0.00209918
S-336	1.2e-05	0.000532528	0.00012501	0.000475198	0.000426867	0.00014458	0.0119132	0.000368792	0.000132877	0.000285241	0.00129509	8.23e-06	3.33e-05	0.000885587	0.000111043	7.38e-05	0.000137624	0.00040807	0.00289809	0.000583675	0.0039163	3.27e-05	0.000120345	0.000582157	0.00334047	4.79e-05	0.000261503	4.54e-05	0.000550718	0.000155345	0.000956497	0.00454939	0.0186916	9.83e-05	6.94e-05	0.0176333	0.000243175	1.42e-05	0.000137624	3.68e-05	0.00086875	8.65e-05	0.00108057	0.000190124	0.001725	0.00108943	0.000737005	0.00225082	0.00323398
S-337	6.2e-05	0.00163495	0.0018444	0.000718042	0.000257165	0.000737972	0.00374932	0.000632718	0.000489797	0.00161808	0.0024899	0	2.98e-05	0.00540423	0.000797789	6.44e-05	7.36e-05	0.000270271	0.000257761	0.000813846	0.00285446	1.63e-05	0.000107421	0.000837621	0.00278684	3.81e-05	0.000150096	2.96e-05	0.000334853	0.000103575	0.000984252	0.00161123	0.0182149	0.000183891	3.96e-05	0.0175919	0.000175442	1.18e-05	0.000136232	3.78e-05	0.00128054	4.99e-05	0.000690476	0.000393587	0.00129928	0.000854897	0.000998359	0.00214985	0.00298907
S-339	0.000253312	0.0153194	0.00710502	0.0207637	0.0039916	0.00225535	0.0255506	0.00479377	0.00107053	0.00476789	0.0205865	0.00010101	0.000329098	0.00786807	0.00121849	0.000448153	0.0015234	0.0262204	0.00627836	0.00151692	0.0246879	0.000146735	0.00108865	0.00687355	0.0262848	0.000267978	0.0261665	3.89e-05	0.00136039	0.000388376	0.00189228	0.0205251	0.018797	0.000348985	0.000235728	0.0261849	0.0162501	3.62e-05	0.00305641	0.000467042	0.0157853	0.00107398	0.00279338	0.00946833	0.00261701	0.00415154	0.00203053	0.00259209	0.00846522
S-346	0.000111167	0.00249953	0.00237555	0.00795145	0.00158914	0.00234035	0.0053679	0.0019937	0.00160203	0.00277401	0.00378556	5.41e-05	7.15e-05	0.0168085	0.00669966	0.000140196	0.000602962	0.000937683	0.00264449	0.000481343	0.00370918	2.83e-05	0.000190129	0.00104977	0.00625521	0.000148691	0.000509154	0.000106329	0.0011557	0.00023877	0.00067018	0.00189162	0.0189753	0.000131296	0.000107179	0.0151517	0.000430598	3.67e-05	0.000457596	7.67e-05	0.0118806	0.000222039	0.00628239	0.000556058	0.00400627	0.00127794	0.000885386	0.00813796	0.00713443
S-351	0.000504993	0.00198204	0.00117169	0.00044948	0.0021886	0.000969284	0.00532508	0.00198819	0.00039928	0.00122688	0.00137616	1.25e-05	3.19e-05	0.00496666	0.00055735	9.41e-05	9.01e-05	0.000518195	0.000239343	0.000387173	0.00867619	3.03e-05	8.92e-05	0.000572097	0.00645649	9.37e-05	0.000254863	6.61e-05	0.000464743	0.000160066	0.000266391	0.00407903	0.0181488	0.000252545	5.2e-05	0.0219162	0.000221826	2.33e-05	0.000293245	6.92e-05	0.00361329	7.11e-05	0.00169272	0.00173049	0.00129399	0.000839035	0.000677005	0.00381477	0.00460792
S-357	0.000143138	0.00364383	0.00118168	0.000546841	0.00124401	0.00066398	0.00328555	0.000241346	0.000537375	0.00283998	0.00292244	7.85e-07	2.58e-05	0.00371004	0.000732965	0.000139996	0.000135698	0.00144134	0.000803976	0.000322979	0.00101713	2.1e-05	0.000161903	0.000493521	0.00294587	4.19e-05	0.00122831	4.74e-05	0.000566805	0.000133796	0.000833984	0.00968826	0.0185185	5.5e-05	3.86e-05	0.0187073	0.000536921	3.5e-05	0.000219563	7.98e-05	0.00347031	0.000273544	0.00158691	0.000327732	0.00150239	0.00111931	0.00147651	0.00352107	0.00457838
S-362	0.000111719	0.00226662	0.000994352	0.00029832	0.000390762	0.000765962	0.00208179	0.000614227	0.000433761	0.00233562	0.00229079	0	3.55e-05	0.00623978	0.000675293	0.000112478	3.15e-05	0.000117347	0.000294858	0.000519196	0.00377654	2.01e-05	8.5e-05	0.000614509	0.0055393	7.61e-05	6.86e-05	2.5e-05	0.000282645	9.82e-05	0.000475072	0	0.0181488	0.000133668	4.56e-05	0.018763	0.00012486	1.34e-05	0.000325082	7.02e-05	0.0021618	8.46e-05	0.000890569	0.000851594	0.00111173	0.000827224	0.000962722	0.00364085	0.00424337
S-363	0.000106252	0.00554604	0.00387252	0.00238138	0.00383217	0.0018717	0.011988	0.00147357	0.00144796	0.00165356	0.00209443	9.97e-05	5.41e-05	0.00420918	0.000544815	0.000100968	0.00222427	0.00130422	0.00236687	9.18e-05	0.000461162	3.13e-05	0.00019948	0.00148026	0.00213717	0.000358609	0.000674942	9.4e-05	0.00164079	0.000239425	0.00381097	0.00260054	0.0182149	0.000208246	0.000210266	0.0135522	0.000122604	0.000718804	9.2e-05	1.54e-05	0.0055642	0.00034947	0.00271083	0.000581497	0.00345488	0.00036234	0.000384939	0.0025905	0.00869124
S-364	4.33e-05	0.00169674	0.00155963	0.000228914	0.000350895	0.000635689	0.00234605	0.000735198	0.000270603	0.001369	0.00143453	0	3.63e-05	0.00246646	0.000289591	8.12e-05	0.000102736	0.00066784	0.000392441	0.000551399	0.00405867	2.52e-05	7.53e-05	0.000690541	0.00354479	5.16e-05	0.000384531	3.91e-05	0.000669639	0.000107047	0.000970452	0.000525272	0.0188324	0.000206443	0.000109989	0.0194839	0.000132489	1.5e-05	0.000149278	2.95e-05	0.00140932	7.11e-05	0.000874826	0.000942069	0.00115873	0.0008475	0.000999434	0.00303596	0.00400516
S-368	0.000145253	0.00332011	0.00467199	0.000543502	0.00120652	0.0015362	0.00517963	0.000548256	0.00188068	0.00412394	0.00154346	1.94e-05	4.22e-05	0.0040557	0.00052053	8.34e-05	0.000307742	0.00177082	0.000335621	0.000357213	0.00434372	3.51e-05	0.000109798	0.00252567	0.00277845	0.000145069	0.000856244	5.57e-05	0.00103462	0.00015016	0.00107946	0.000308141	0.0186567	0.000195766	0.000158809	0.0187146	6.57e-05	9.51e-06	0.000196441	5.47e-05	0.00274042	0.000221529	0.00113117	0.000429686	0.00240885	0.00135086	0.00062628	0.00267914	0.00508149
S-369	0.000224041	0.00611555	0.00630094	0.00180319	0.00367266	0.00205798	0.00929738	0.00132707	0.00150492	0.0194954	0.00590644	1.99e-05	0.000134732	0.0099614	0.00095467	0.000124549	0.000126057	0.000209479	0.00077773	0.000420578	0.000965109	3.45e-05	0.000173158	0.00429213	0.00202376	8.83e-05	0.000108309	2.74e-05	0.000377659	0.000140307	0.00280545	0.00179719	0.0189394	0.000134988	0.000103104	0.0194006	0.00049871	9.39e-06	0.000305785	5.51e-05	0.00298728	0.000209621	0.00341884	0.00124913	0.00200562	0.00130007	0.00124791	0.00278884	0.00763759
S-370	0.000252341	0.00795443	0.00187051	0.00114789	0.000571433	0.00084355	0.00855141	0.00121292	0.000529542	0.00356163	0.00351032	1.48e-05	5.56e-05	0.00510883	0.000480166	7.95e-05	3.32e-05	0.000410577	0.00168345	0.000157643	0.00102487	1.31e-05	9.78e-05	0.00257772	0.00152758	0.000146383	0.000320807	7.23e-05	0.000410109	9.95e-05	0.000444638	0	0.0190114	0.000114879	0.00010599	0.0211516	9.82e-05	9.45e-06	0.0001	3.89e-05	0.00315767	0.000514695	0.00308505	0.00123276	0.00154795	0.000815789	0.00104467	0.003012	0.00631337
S-371	0.000226413	0.00227559	0.00287465	0.0023284	0.000771448	0.00110016	0.00492494	0.000565185	0.000778659	0.00900429	0.00215926	5.67e-06	2.28e-05	0.00696691	0.00089023	0.000117237	0.00109877	0.00187952	0.00055067	0.000443342	0.0099107	3.73e-05	0.000163992	0.000405617	0.00561564	8.8e-05	0.000834687	9.11e-05	0.00154523	0.000143902	0.000303288	0	0.0197239	0.000197294	8.3e-05	0.0205989	0.000195051	1.91e-05	0.000470583	9.26e-05	0.00308664	9.84e-05	0.00258233	0.000844565	0.00173449	0.00241258	0.00174398	0.00388445	0.0124761
S-379	0.000201878	0.00789923	0.00518009	0.00203444	0.00104578	0.00174842	0.00777474	0.00086651	0.00157968	0.00826238	0.00823854	3.64e-05	8.65e-05	0.0107265	0.00249122	0.000265879	0.00015084	0.0010064	0.00124164	0.000715507	0.00353842	5.23e-05	0.000262597	0.00226462	0.00470947	0.000143725	0.000483123	7.23e-05	0.000584712	0.000217667	0.000601768	0.0044394	0.0188324	0.000299503	9.24e-05	0.0217707	0.000718951	1.42e-05	0.000718236	0.000132907	0.00237598	0.000213509	0.00181918	0.000206849	0.00193178	0.00154963	0.00123719	0.0020808	0.00722554
C-001	0.000217144	0.00173985	0.00157472	0.0145613	0.000758756	0.000870519	0.0136253	0.00162467	0.000730177	0.00714517	0.00552172	2.75e-05	5.09e-05	0.0073359	0.000678402	0.000151024	0.000234236	0.00132001	0.00203193	0.000701432	0.00922341	3.28e-05	0.000364867	0.00111694	0.00679626	9.96e-05	0.000471358	4.8e-05	0.000702264	0.000128522	0.000401603	0.0062274	0.0185185	0.000198887	4.91e-05	0.0189013	0.000592221	1.23e-05	0.00103711	0.000297831	0.00304443	0.000153161	0.00427291	0.000417058	0.00168743	0.0156623	0.00150164	0.00426034	0.00870067
C-003	9.92e-05	0.00218569	0.00220816	0.000576642	0.000741472	0.00215816	0.00352906	0.00061537	0.00119067	0.00613218	0.00474775	3.9e-05	4.38e-05	0.00205975	0.000674233	0.000168772	0.000276447	0.00248631	0.00185895	0.000343883	0.00339649	2.16e-05	0.000248559	0.000269581	0.00218884	5.67e-05	0.000695551	4.34e-05	0.000702318	0.000175703	7.13e-05	0	0.0197628	0.000227701	8.86e-05	0.0136406	0.000127088	1.23e-05	0.000494621	0.00017613	0.0053144	0.000124591	0.00140562	0.000406064	0.0023786	0.00202651	0.00135504	0.0017837	0.00434129
C-004	2.75e-05	0.00115517	0.000367504	0.00125002	0.000825738	0.000287792	0.017014	0.000705953	0.000481229	0.000227711	0.00173423	4.28e-05	5.3e-05	0.000311946	8.12e-05	8.78e-05	0.000440604	0.000410738	0.00475113	0.000448984	0.000871755	3.31e-05	0.000193234	0.000720306	0.00147932	0.000184796	0.000134921	5.18e-05	0.000730745	0.000160728	0.000964052	0.00141524	0.0196464	0.00026039	0.000194858	0.00785888	0.000203586	8.26e-06	0.000108505	2.94e-05	0.00291567	0.000185869	0.00270669	9.91e-05	0.00328741	0.00065431	0.000337115	0.00238611	0.00190296
C-009	0.000173722	0.00223885	0.00477131	0.000197777	0.00186252	0.000785231	0.00285532	0.000158216	0.0006178	0.0062399	0.0023583	0	1.16e-05	0.0067012	0.000736517	0.000124373	4.99e-05	0.0017533	0.00238737	0.00107907	0.00571737	2.99e-05	0.000290279	0.000367655	0.0038001	8.51e-05	0.00139115	1.94e-05	0.000687009	8.64e-05	0.000250685	0.0157202	0.019802	0.000102924	5.5e-05	0.0210427	0.00147192	1.13e-05	0.000263777	0.000112425	0.000477379	0.000229903	0.00745176	0.00105241	0.00157968	0.00222725	0.00193831	0.00552305	0.00926497
C-012	8.51e-05	0.000813909	0.000565379	0.00121101	0.000217261	0.000271843	0.0012018	7.27e-05	0.000220355	0.000915339	0.000630016	0	4.12e-06	0.000989036	0.000306132	4.04e-05	9.8e-05	0.000622908	0.000483322	7.2e-05	0.00161158	1.13e-05	4.85e-05	0.000142938	0.00156292	1.47e-05	0.000248125	7.11e-05	0.000308268	7.07e-05	0.00018636	0.0142294	0.0204082	5.72e-05	3.33e-05	0.0161354	0.000202013	1.18e-05	7.54e-05	4.07e-05	0.00271512	3.3e-05	0.000419237	0.000127764	0.00121064	0.00118475	0.000978356	0.00228645	0.00246585
C-015	7.48e-05	0.00074319	0.000846224	0.00151624	0.00499651	0.000444953	0.00924077	0.00105411	0.000156999	0.000381569	0.00258128	9.28e-05	0.000111161	0.000266867	0.000147056	0.000114548	0.000195325	0.0194423	0.00116961	0.000300083	0.00819451	5.14e-05	0.000525546	0.000289186	0.00743061	8.66e-05	0.00848816	3.02e-05	0.00108631	0.000402841	9.15e-05	0.0013561	0.0196078	0.000350723	6.11e-05	0.0208364	0.00638419	1.25e-05	0.000180733	3.76e-05	0.000989955	6.03e-05	0.000303839	0.0013476	0.000772681	0.00100399	0.000297805	0.000835758	0.00106479
C-019	3.68e-05	5.49e-05	0.00082053	0.00657523	0.000387013	0.0002824	0.0162357	0.000485431	0.000273907	0.000379887	0.00197247	5.38e-06	3.01e-05	0.000856041	0.000171534	0.000126804	0.00057905	0.00112108	0.000693174	0.000545546	0.0084904	4.03e-05	0.00027129	0.000842459	0.00264857	4.07e-05	0.000400478	3.34e-05	0.000911067	0.000113076	0.000288944	0.0073592	0.0194553	0.000293103	6.52e-05	0.0145662	0.000407226	1.08e-05	0.000120522	2.77e-05	0.00615239	4.59e-05	0.000691458	0.000224524	0.00291983	0.0010815	0.000678981	0.00281495	0.00391963
C-020	0.000122359	0.00157289	0.000807474	0.000368961	0.00604754	0.000674981	0.0095998	0.00116664	0.000576321	0.000977602	0.00179632	6.41e-05	3.73e-05	0.00294396	0.000267737	6.37e-05	0.000383823	0.000599063	0.00716743	0.000661663	0.00370153	5.25e-05	0.000173032	0.000908544	0.00387339	8.19e-05	0.000234212	4.54e-05	0.000549316	0.000139353	0.00155859	0.013401	0.0194175	7.02e-05	9.08e-05	0.0175568	0.000581142	7.48e-06	0.000110401	1.86e-05	0.00120974	0.000315691	0.00330924	0.000288562	0.00364106	0.000714933	0.00052574	0.00391208	0.00411669
C-023	0.00011079	0.00122986	0.00173381	0.00128112	0.00118118	0.00124604	0.00894907	0.000786553	0.000637805	0.00128439	0.00151753	0	2.63e-05	0.00304906	0.000350644	8.04e-05	0.000179217	0.000318738	0.00335185	0.000553499	0.00406989	1.59e-05	0.000112467	0.000301241	0.00127606	3.54e-05	0.000164806	3.12e-05	0.000302949	0.00010351	0.000293242	0.0129585	0.0190114	0.000137573	4.78e-05	0.019481	0.000519136	1.01e-05	8.67e-05	1.45e-05	0.0014077	0.000102281	0.000517069	0.000313615	0.00137256	0.000949952	0.000658058	0.00162254	0.00330332
C-025	0.000149811	0.000938268	0.00151233	0.000388207	0.00185132	0.00130494	0.0096544	0.00113645	0.000897045	0.0010006	0.00135201	3.44e-05	5.67e-05	0.00466158	0.00043221	4.9e-05	0.000505393	0.000325474	0.00130201	0.000620697	0.00177626	2.76e-05	8.03e-05	0.00102462	0.00179114	4.16e-05	0.000150448	7.25e-05	0.000503048	0.000255823	0.000456035	0.00475761	0.0190114	0.000503077	4.2e-05	0.0180857	0.000489789	1.08e-05	0.000100251	1.93e-05	0.00111231	0.000195927	0.00438052	0.000629584	0.00498387	0.000682793	0.000341889	0.00379931	0.00308299
C-027	1.36e-05	0.000159871	0.00092369	0.0015011	0.000366316	0.000444407	0.00543423	0.000569072	0.000366262	0.000486008	0.00117666	1.8e-05	6.13e-05	0.00109851	0.000287679	7.78e-05	0.000525832	0.000913577	0.00088526	0.000648584	0.00692729	4.35e-05	0.000257777	0.000443149	0.00433449	3.33e-05	0.000287433	2.79e-05	0.000689365	0.000165064	0.00016244	0.000812582	0.0182149	0.00010474	3.67e-05	0.018011	0.000162877	1.04e-05	0.000324798	7.01e-05	0.0035698	7.61e-05	0.000813456	0.000299515	0.00202012	0.0014449	0.000747693	0.00231218	0.00345049
C-031	3.68e-05	0.00110268	0.00032035	0.000535629	0.000555132	0.000227723	0.00536091	0.00052585	0.000162537	0.000218987	0.00138301	5.46e-05	3.54e-05	0.000367158	0.000116114	0.000103478	0.000246375	0.00140383	0.00103714	0.000433827	0.00155857	4.02e-05	0.000254423	0.000505797	0.00206167	0.000166136	0.000362131	4.96e-05	0.000936135	0.000144847	0.000646112	0.000766456	0.0183486	0.000168553	0.000103588	0.0125332	0.000694678	8.54e-06	0.000106362	2.33e-05	0.00294405	0.000125756	0.000530794	0.0002233	0.00199547	0.000646002	0.000368834	0.00163408	0.00192152
C-035	0.000156133	0.00277648	0.00311454	0.000291237	0.000571629	0.0013008	0.00473749	0.000342882	0.00120497	0.0117836	0.00519226	2.43e-06	3.97e-05	0.0033506	0.000342043	0.000102152	0.000107004	0.00145786	0.000751248	0.000824791	0.00246772	2.99e-05	0.000135074	0.00030292	0.0017851	5.63e-05	0.000453601	3.36e-05	0.000483737	9.18e-05	0.000182225	0	0.0187266	0.000143432	6.13e-05	0.0188102	0.000234799	1.33e-05	0.000132497	5.67e-05	0.00175257	0.000117639	0.000946564	0.0002549	0.00204117	0.00130901	0.000987575	0.0021057	0.00550087
C-037	6.25e-05	0.000462021	0.000474883	0.00245514	0.000222172	0.000532261	0.00399202	0.000368495	0.000240789	0.000948474	0.000448455	0	0	0.00165484	0.000206374	3e-05	9.85e-05	0.000776163	0.000410839	0.000156395	0.00238528	1.82e-05	4.75e-05	0.000229337	0.00166588	2.5e-05	0.000238381	3.25e-05	0.000645021	7.36e-05	0.000285364	0.00248497	0.0191571	9.34e-05	3.72e-05	0.0166257	0.000158422	3.02e-05	4.87e-05	1.27e-05	0.000799243	4.13e-05	0.000221174	0.000159596	0.00106226	0.000360538	0.000226518	0.00119314	0.000845434
C-042	7.42e-05	0.000266148	0.0011177	0.000366541	0.000185293	0.000647528	0.00635586	0.000240574	0.000365917	0.00202933	0.00152484	0	1.9e-05	0.00164664	0.000744858	3.23e-05	2.73e-05	0.00150563	0.000343525	0.00057824	0.00478151	1.68e-05	7.43e-05	0.000127127	0.00170127	1.18e-05	0.000444928	2.16e-05	0.000429197	8.77e-05	0.000131885	0.00637293	0.0190476	0.000121001	2.19e-05	0.0202686	0.000798415	5.65e-06	0.000429584	7.17e-05	0.00158229	3.58e-05	0.000302368	0.000309386	0.000641373	0.00127213	0.000703702	0.00134026	0.00233173
C-043	0.000158421	0.00417121	0.00240691	0.0016897	0.00177036	0.00100544	0.0101966	0.000617463	0.000646719	0.00123002	0.00176067	3.17e-05	5.41e-05	0.00276834	0.000428161	7.24e-05	0.000222319	0.00130185	0.000864225	0.000621765	0.00235232	2.54e-05	7.22e-05	0.00165349	0.00317744	0.000113422	0.00104317	4.25e-05	0.000971241	0.000139108	0.00182916	0.00075313	0.019685	0.000108291	9.19e-05	0.0210404	0.000148191	1.43e-05	6.82e-05	3.59e-05	0.00189334	0.000281722	0.00280295	0.000839176	0.00362437	0.000908714	0.000647229	0.00523691	0.00814477
C-046	1.99e-05	0.00100184	0.000577857	0.00767427	0.000925403	0.000390803	0.0111203	0.000957671	0.00029503	0.000354649	0.00184109	8.19e-05	6.15e-05	0.000602172	0.000148168	0.00014577	0.000660972	0.00161864	0.00136019	0.000116263	0.00176842	3.08e-05	0.000332125	0.000391623	0.00188845	7.51e-05	0.000378418	5.06e-05	0.00122298	0.000207939	0.000536421	0.00123021	0.019802	5.58e-05	8.06e-05	0.0102319	0.000123761	0.000393808	8.22e-05	1.56e-05	0.00419207	0.00022855	0.00307661	0.000498476	0.00213533	0.000303955	0.000237414	0.00280322	0.0040365
C-050	0.000142119	0.00148106	0.00344678	0.00230933	0.000537055	0.00186972	0.0178327	0.00116997	0.00129097	0.00274893	0.00210339	0	5.78e-05	0.00908726	0.00161139	6.9e-05	0.000496254	0.00159027	0.00340085	0.00128408	0.00404813	4.21e-05	0.000166482	0.00083171	0.00366815	0.000159621	0.000244556	5.6e-05	0.000605608	0.000190005	0.00174836	0.0186875	0.0191571	0.00012414	0.000101962	0.0188181	0.000183088	3.01e-05	0.000174883	3.07e-05	0.00453344	0.000121228	0.00111948	0.000124	0.00220218	0.00101413	0.000507931	0.00275022	0.00489656
C-051	5.07e-05	0.00116078	0.000726147	0.000593872	0.000598163	0.000376989	0.0143168	0.00156061	0.000290988	0.000282603	0.00188266	3.78e-05	5.25e-05	0.00093509	0.000165511	6.97e-05	0.00022889	0.000511939	0.000566515	0.0016258	0.00509234	5.4e-05	0.000151386	0.000498176	0.00170514	0.000118123	0.000144589	3.09e-05	0.000398914	0.000187547	0.000317789	0.00629161	0.0189036	0.000128848	6.16e-05	0.0185954	0.000947209	2.54e-05	0.00017724	4.13e-05	0.000785766	0.000123109	0.000426383	0.000440647	0.00134844	0.000823013	0.000217496	0.00189768	0.00334785
C-052	0.000163928	0.00182898	0.00198868	0.00437475	0.00036869	0.00087018	0.00439108	0.000986439	0.00048415	0.00462996	0.00236654	0	1.07e-05	0.00892722	0.00032972	5.55e-05	0.000140641	0.00260146	0.0050043	0.000630857	0.00812897	1.84e-05	0.000132947	0.000312233	0.00520779	8.43e-05	0.000522232	5.35e-05	0.000712052	0.000111672	0.000221806	0.00796853	0.019802	0.000355493	8.13e-05	0.0194618	0.000537086	1.14e-05	0.000322352	7.36e-05	0.00476528	0.000209289	0.00149127	0.000443257	0.00106962	0.00142629	0.000636213	0.00295364	0.00527668
C-053	7.65e-05	0.0011546	0.00189375	0.000604987	0.00233703	0.000686342	0.00751579	0.00101084	0.000507831	0.00143414	0.0031576	5.81e-05	4.88e-05	0.000794926	0.000375529	0.000167837	0.000383695	0.00676545	0.000884056	0.00053414	0.00681958	5.51e-05	0.000755489	0.000575027	0.00251928	0.00010418	0.00104821	5.06e-05	0.00111797	0.000208389	0.00015287	0.00248004	0.0185874	0.000404988	7.71e-05	0.0184864	0.000625222	2.29e-05	0.000341972	5.36e-05	0.00572524	0.000253873	0.000443449	0.000494703	0.00450423	0.00159033	0.000820762	0.00174687	0.00630885
C-055	6.92e-05	0.00179062	0.0013109	0.00100556	0.000576372	0.000614487	0.0111442	0.0012092	0.000591101	0.000514107	0.00196975	9.15e-06	4.55e-05	0.00143337	0.000249439	9.83e-05	0.000288288	0.000641424	0.00044929	0.00218471	0.00956411	5.67e-05	0.000144188	0.00193982	0.00347396	8.92e-05	0.000163349	5.73e-05	0.000609411	0.000162175	0.000433064	0.004314	0.0196078	0.000177081	4.07e-05	0.0199869	0.00137663	1.29e-05	0.000513843	0.00010352	0.00224982	8.77e-05	0.000649082	0.000291839	0.001817	0.00175658	0.000806856	0.00289404	0.00768312
C-057	0.000141549	0.00150526	0.00174544	0.00608577	0.00074201	0.00162264	0.00965329	0.000623843	0.000713644	0.00315351	0.00172805	2.55e-05	4.5e-05	0.00343396	0.00057058	7.99e-05	0.000185881	0.0140597	0.000445282	0.000585631	0.00547982	4.08e-05	0.000348129	0.000384226	0.00536582	7.65e-05	0.00284593	3.7e-05	0.000885862	0.000201879	0.000227342	0.0152418	0.0195312	0.000181748	4.34e-05	0.0213513	0.00215374	1.7e-05	0.00033434	7.83e-05	0.00264007	5.5e-05	0.00039183	0.00128214	0.00167962	0.00114189	0.000562881	0.00187326	0.00362694
C-058	0.000128273	0.00159523	0.00187746	0.00052887	0.000873204	0.00118982	0.00584099	0.00163171	0.00126137	0.00174715	0.00179832	9.82e-06	4.71e-05	0.00957077	0.0011611	0.000115045	0.000185538	0.000576142	0.00134779	0.000890813	0.00380491	2.84e-05	0.000175975	0.000347798	0.00334321	6.33e-05	0.000157135	3.69e-05	0.000364806	0.000142332	0.000401398	0.00496063	0.0189394	0.000176462	5.79e-05	0.0194219	0.000484518	1.47e-05	0.000107458	1.81e-05	0.00128359	9.63e-05	0.000540409	0.000521168	0.00123606	0.000837843	0.000373167	0.00322235	0.00593376
C-066	0.000177797	0.0032999	0.00232527	0.00450734	0.00217573	0.00160809	0.00927524	0.0015975	0.00144487	0.00163077	0.00435663	3.47e-05	0.000112311	0.00487166	0.000702697	0.000104032	0.000304717	0.00140119	0.00143557	0.000874374	0.00234522	2.86e-05	0.000139999	0.000869004	0.00284564	0.0001295	0.000383971	6.38e-05	0.000552468	0.000217244	0.00166652	0.00403094	0.0191205	0.000354003	7.08e-05	0.019952	0.000275529	1.25e-05	0.000216914	3.53e-05	0.00276009	0.00013109	0.00156132	0.00038985	0.00203076	0.000716406	0.000330515	0.00223906	0.00386716
C-067	0.000154904	0.00191054	0.00276907	0.007203	0.000557079	0.00179985	0.00940976	0.000584971	0.001128	0.00183931	0.00454829	1.6e-05	4.92e-05	0.00117699	0.000678352	0.000130852	0.000286684	0.00524305	0.000886719	0.000336011	0.00994827	2.92e-05	0.000326053	0.000387576	0.00193847	3.97e-05	0.0010331	6.56e-05	0.000651009	0.000118488	0.000138194	0.00958711	0.0186567	0.000194906	8.1e-05	0.0191308	0.000366393	2.27e-05	0.000241618	0.000124396	0.0184771	8.62e-05	0.000856549	0.000798402	0.00217996	0.00200067	0.00140861	0.00313753	0.00523014
C-069	0.000104843	0.00142312	0.00100212	0.00517975	0.000464682	0.0010881	0.00397979	0.000875408	0.000437673	0.00155545	0.00211996	3.87e-05	5.29e-05	0.00485469	0.000487306	0.000142726	0.000313308	0.00859139	0.000333957	0.000303062	0.0113927	4.41e-05	0.000807538	0.000682077	0.00715072	6.01e-05	0.00169965	5.09e-05	0.000730645	0.000203451	0.000239955	0.00495835	0.0188679	0.000211723	6.26e-05	0.0212889	0.00111937	1.64e-05	0.000386755	5.87e-05	0.00221061	4.35e-05	0.000448796	0.000907901	0.000506858	0.00117888	0.000404678	0.00129206	0.00187891
C-074	0.000200667	0.0020793	0.00264664	0.00369924	0.00528668	0.00194561	0.0102202	0.000626163	0.00127669	0.00153777	0.00138766	8.09e-05	0.000181635	0.0113331	0.000531885	0.000118705	0.000459219	0.00354813	0.00277438	0.000706453	0.00374314	2.46e-05	0.000198027	0.00119069	0.00686859	0.000119497	0.00144502	0.000112518	0.001489	0.000249609	0.000851081	0.00748349	0.0184843	0.000109204	0.000131256	0.018511	0.00218645	1.85e-05	0.000146563	2.23e-05	0.00343978	0.000549539	0.00344268	0.000935271	0.00665546	0.000796626	0.000578922	0.00357411	0.00490608
C-079	0.000395985	0.00199458	0.00110529	0.000833774	0.0131626	0.00115459	0.0143468	0.00114124	0.000619051	0.00145686	0.0027516	2.64e-05	5.73e-05	0.00711444	0.000191789	6.43e-05	0.000138851	0.000278066	0.00158115	0.000561078	0.00389472	3.72e-05	6.29e-05	0.000529072	0.00321845	0.000116796	7.72e-05	3.52e-05	0.000285863	0.000116038	0.00120312	0.00642319	0.019685	0.00024324	5.34e-05	0.020765	0.000250763	1.29e-05	6.76e-05	1.3e-05	0.00296059	0.00013964	0.000829922	0.00435505	0.00320565	0.000479472	0.000507503	0.00216155	0.00458039
C-081	0.000191606	0.00197574	0.00128491	0.00531588	0.000716726	0.00129367	0.00834984	0.000884852	0.00106596	0.00208357	0.00141828	5.19e-05	5.04e-05	0.00412276	0.000455325	7.68e-05	0.000308811	0.00112522	0.00225888	0.000691024	0.00199954	3.51e-05	0.000146418	0.000496874	0.0028681	0.000148769	0.000287972	7.23e-05	0.000495586	0.000232639	0.000587765	0.0060995	0.0186567	0.000194923	6.45e-05	0.016856	0.000128317	1.89e-05	0.000175792	4.45e-05	0.00189003	0.000344433	0.0037553	0.000246682	0.0019454	0.00078723	0.000295767	0.00382548	0.00442561
C-082	0.000319474	0.00139967	0.00121985	0.00279938	0.00127313	0.000960263	0.007013	0.000309553	0.00059575	0.000822125	0.000889863	2.18e-05	1.75e-05	0.00314846	0.000402784	7.01e-05	0.00021537	0.0019906	0.00098316	0.000214549	0.00412393	2.35e-05	0.000124275	0.000339973	0.00521248	5.96e-05	0.000793906	5.86e-05	0.000455444	0.000205909	5.91e-05	0	0.019084	0.000205383	4.95e-05	0.0222279	0.000473381	1.95e-05	0.000168558	6.63e-05	0.00392351	6.53e-05	0.00116864	0.00404226	0.0019449	0.000762534	0.000740524	0.00191616	0.00357729
C-085	0.000124647	0.00133771	0.00210218	0.00470683	0.00187671	0.00185953	0.0110453	0.000618118	0.00132059	0.00148682	0.00227232	3.44e-06	6.6e-05	0.00201235	0.000620971	0.000131971	0.000181382	0.00191271	0.000495118	0.000514971	0.00480503	2.76e-05	0.000168412	0.000643559	0.00113462	6.36e-05	0.000368647	5.6e-05	0.000688059	0.000161559	0.000120677	0.000469383	0.0185874	0.000185618	5.1e-05	0.0178375	0.000334235	8.44e-06	0.000163235	3.11e-05	0.00480262	0.000159471	0.000870647	0.000255412	0.0068255	0.00110491	0.000510206	0.00391341	0.00528774
C-089	0.000111835	0.00154131	0.0024377	0.00227962	0.000368198	0.00175497	0.00591774	0.000470414	0.00105686	0.00352734	0.00184029	2.71e-05	3.06e-05	0.00441198	0.000402625	7.09e-05	0.000191313	0.00800611	0.00116425	0.000453368	0.00460755	2.22e-05	0.000205559	0.000782146	0.00369665	5.36e-05	0.00127992	2.96e-05	0.000994249	0.000102521	0.000422441	0.0137418	0.0185185	0.000165926	4.8e-05	0.0183234	0.00123588	1.58e-05	0.0001627	3.72e-05	0.00179149	6.25e-05	0.00039194	0.000941284	0.00151665	0.0010993	0.00038844	0.00333192	0.00503949
C-091	0.000113383	0.00314556	0.00184586	0.00244746	0.00131824	0.00153588	0.00639953	0.00141115	0.00097678	0.00183799	0.00291442	4.45e-05	9.73e-05	0.00469665	0.000606009	0.00011978	0.000203169	0.000516139	0.00159169	0.000936095	0.00465847	2.72e-05	0.000219972	0.000529956	0.0019856	7.24e-05	0.000133825	6.36e-05	0.000502179	0.000180196	0.000684337	0.0135447	0.0182149	0.000357834	7.75e-05	0.0139581	0.000277061	6.99e-06	0.000153329	2.5e-05	0.0018002	0.000223184	0.00288203	0.000702988	0.0020053	0.000639785	0.000342794	0.00326421	0.00341475
C-092	0.000362872	0.0040504	0.00338781	0.0021463	0.00222791	0.00177767	0.0079238	0.000648493	0.00106575	0.00615391	0.00961517	4.69e-05	6.89e-05	0.0230338	0.00162969	0.000192048	0.000162732	0.0049193	0.00230904	0.000386394	0.0145765	3.75e-05	0.00019942	0.00084181	0.0166514	0.00013417	0.00113226	8.2e-05	0.0008594	0.000202472	0.000230245	0.0079812	0.0191939	0.000173944	7.53e-05	0.0196573	0.00676225	1.65e-05	0.000391229	9.88e-05	0.0114251	0.000613519	0.0204642	0.000685867	0.00290116	0.000887105	0.000592775	0.00987672	0.0061607
C-094	0.000113991	0.00205759	0.00191215	0.0012017	0.000487493	0.00151257	0.00827295	0.000724757	0.00085129	0.00142144	0.00261819	2.38e-06	9.33e-05	0.00115345	0.000566197	0.000127799	0.000264113	0.00382572	0.000563627	0.000289235	0.00397212	3.65e-05	0.00022664	0.000686325	0.0019754	7.2e-05	0.000995773	6.56e-05	0.000517409	0.000183107	0.000285055	0.00874679	0.0191939	0.000366789	0.000112687	0.0184859	0.000199906	2.21e-05	0.000206043	4.89e-05	0.00230732	0.000114375	0.00060298	0.000558143	0.000889722	0.00100878	0.000314895	0.00193417	0.00403437
C-095	0.0003273	0.00367014	0.00198159	0.000654468	0.00380165	0.00155878	0.010798	0.00242983	0.000857239	0.0018963	0.00456078	0.000171243	4.86e-05	0.00879608	0.000477788	0.000149599	0.000812896	0.0006517	0.00308232	0.000536165	0.00798256	2.37e-05	0.000149467	0.00209986	0.00575768	0.000226853	0.000218189	6.28e-05	0.000911629	0.000280849	0.00105438	0.0114671	0.0198807	0.000639643	0.000138036	0.0206261	0.00026632	1.38e-05	0.000267869	6.07e-05	0.00407825	0.00153496	0.016654	0.000507405	0.007271	0.000854504	0.000445404	0.00817505	0.00625283
C-096	0.00011599	0.00708021	0.0237024	0.000702503	0.0213576	0.0241121	0.0239747	0.00205184	0.0200143	0.0230864	0.0134401	0.000204109	0.000218471	0.0233305	0.00463962	0.00069917	0.000287122	0.00158288	0.024205	0.00408825	0.00637745	6.05e-05	0.000512365	0.0213687	0.00791973	0.000185351	0.000733708	0.000219605	0.0011203	0.000372723	0.00161617	0.0231924	0.0193424	0.000205386	6.95e-05	0.0240976	0.0119789	1.72e-05	0.00183085	0.000248576	0.00240091	0.000577116	0.00731623	0.000737609	0.00062676	0.00541347	0.00449824	0.0241487	0.0235544
C-097	0.000570283	0.00292378	0.00545306	0.000902502	0.0145548	0.00186766	0.0102233	0.000702479	0.00312321	0.00239779	0.00259773	0.000106463	0.000357208	0.00440077	0.000933739	0.000249146	0.00144694	0.00189641	0.00694733	0.000576754	0.00162175	3.44e-05	0.000207237	0.00603438	0.003838	0.000620968	0.000600478	0.000232747	0.00179578	0.000653394	0.00176707	0.0123714	0.019685	0.00034992	0.00022847	0.0220075	0.00420788	1.99e-05	0.000213856	5.15e-05	0.0037553	0.00193311	0.0204587	0.000376693	0.010401	0.00103537	0.000757477	0.00997564	0.00630469
[truncated: 24 more columns]

## Sheet: RT
Sample	X.8892..hexanoic.acid..7.11..Results	X.5950..L.alanine.1..7.4748..Results	X.6287..L.valine.2..9.151..Results	X.1176..urea..9.599..Results	X.700..ethanolamine..9.879..Results	X.6106..L.leucine.2..9.945..Results	X.753..glycerol..9.941..Results	X.938..nicotinic.acid..10.27..Results	X.791..DL.isoleucine.2..10.225..Results	X.145742..L.proline.2..10.321..Results	X.750..glycine..10.456..Results	X.439194..glyceric.acid..10.735..Results	X.638129..citraconic.acid..10.792..Results	X.5951..L.serine.2..11.174..Results	X.6288..L.threonine.2..11.464..Results	X.239..Beta..alanine..1..12.044..Results	X.92824..D.malic.acid..12.794..Results	X.649..5.6.dihydrouracil.2..12.773..Results	X.169019..D.threitol..12.954..Results	X.6137..L.methionine.2..13.188..Results	X.5960..aspartic.acid.2..13.207..Results	X.597..cytosine.2..13.255..Results	X.5810..trans.4.hydroxy.L.proline.2..13.267..Results	X.119..gamma.aminobutyric.acid..GABA...13.326..Results	X.33032..L.glutamic.acid.2..14.398..Results	X.135..4.hydroxybenzoic.acid..14.505..Results	X.236..L.asparagine.1..14.496..Results	X.66308..arabinose..14.897..Results	X.439240..D.lyxose.2..14.889..Results	X.993..ribose..15.113..Results	X.6912..xylitol..15.376..Results	X.94154..arabitol..15.601..Results	X.827..ribitol..15.66..Results	X.42953..diglycerol.2..15.958..Results	X.8468..4.hydroxy.3.methoxybenzoic.acid..15.989..Results	X.754..glycerol.1.phosphate..16.056..Results	X.738..L.glutamine.3..16.092..Results	X.72..3.4.dihydroxybenzoic.acid..16.586..Results	X.6262..L.ornithine.2..16.632..Results	X.9750..citrulline.2..16.691..Results	X.311..citric.acid..16.615..Results	X.190..adenine.1..17.066..Results	X.5984..fructose.1..17.18..Results	X.204..allantoin.2..17.356..Results	X.441032..D....altrose.1..17.397..Results	X.5962..L.lysine.2..17.643..Results	X.6274..L.histidine.3..17.658..Results	X.24749..D.glucose.2..17.625..Results	X.6057..tyrosine.2..17.871..Results
S-038	5.217	5.569	6.691	6.843	7.175	7.221	7.245	7.41	7.43	7.477	7.563	7.779	7.845	8.044	8.296	8.631	9.156	9.252	9.361	9.418	9.424	9.464	9.484	9.504	10.207	10.254	10.337	10.586	10.632	10.748	10.987	11.077	11.12	11.213	11.289	11.342	11.372	11.7	11.717	11.73	11.747	12.062	12.188	12.284	12.334	12.417	12.44	12.503	12.543
S-255	5.221	5.546	6.681	6.82	7.165	7.212	7.232	7.401	7.421	7.467	7.557	7.769	7.836	8.041	8.294	8.625	9.149	9.249	9.358	9.415	9.425	9.461	9.481	9.501	10.208	10.251	10.337	10.589	10.632	10.749	10.984	11.074	11.117	11.21	11.293	11.342	11.372	11.704	11.714	11.731	11.747	12.062	12.189	12.285	12.331	12.417	12.441	12.504	12.547
S-200	5.249	5.577	6.692	6.831	7.18	7.22	7.243	7.412	7.432	7.478	7.565	7.777	7.847	8.046	8.298	8.63	9.154	9.25	9.356	9.419	9.423	9.462	9.486	9.506	10.209	10.255	10.338	10.587	10.63	10.75	10.985	11.075	11.118	11.211	11.29	11.344	11.37	11.705	11.718	11.732	11.748	12.06	12.19	12.286	12.332	12.415	12.438	12.505	12.541
S-196	5.222	5.544	6.682	6.821	7.173	7.213	7.233	7.402	7.425	7.468	7.558	7.767	7.84	8.039	8.291	8.63	9.154	9.25	9.356	9.419	9.423	9.462	9.486	9.502	10.205	10.255	10.338	10.587	10.633	10.743	10.985	11.075	11.118	11.211	11.29	11.34	11.373	11.705	11.718	11.732	11.748	12.06	12.183	12.286	12.332	12.415	12.442	12.505	12.541
S-367	5.249	5.58	6.695	6.834	7.179	7.223	7.242	7.412	7.432	7.481	7.564	7.777	7.846	8.045	8.298	8.626	9.153	9.25	9.359	9.419	9.422	9.459	9.489	9.505	10.209	10.252	10.338	10.587	10.63	10.746	10.985	11.074	11.118	11.21	11.29	11.343	11.376	11.705	11.715	11.731	11.748	12.06	12.186	12.289	12.332	12.418	12.438	12.504	12.544
S-366	5.242	5.581	6.692	6.831	7.18	7.22	7.243	7.409	7.432	7.478	7.565	7.777	7.843	8.046	8.294	8.626	9.15	9.25	9.363	9.416	9.423	9.459	9.486	9.502	10.209	10.255	10.338	10.587	10.63	10.75	10.985	11.075	11.118	11.214	11.287	11.343	11.37	11.705	11.718	11.728	11.748	12.06	12.186	12.286	12.332	12.418	12.442	12.505	12.544
S-303	5.216	5.531	6.666	6.805	7.163	7.203	7.226	7.386	7.415	7.459	7.548	7.77	7.833	8.039	8.288	8.626	9.154	9.25	9.36	9.419	9.423	9.462	9.479	9.502	10.209	10.252	10.335	10.584	10.634	10.75	10.985	NA	11.118	11.211	11.291	11.34	11.373	11.702	11.719	11.735	11.748	12.057	12.186	12.286	12.329	12.415	12.435	12.505	12.541
S-347	5.22	5.535	6.67	6.809	7.164	7.204	7.227	7.393	7.416	7.463	7.549	7.768	7.831	8.04	8.292	8.627	9.155	9.248	9.357	9.413	9.42	9.467	9.483	9.5	10.206	10.253	10.339	10.585	10.634	10.747	10.986	NA	11.119	11.215	11.291	11.341	11.371	11.706	11.713	11.729	11.749	12.058	12.187	12.29	12.33	12.416	12.439	12.502	12.542
S-223	5.251	5.579	6.691	6.836	7.178	7.221	7.245	7.41	7.43	7.48	7.566	7.779	7.845	8.047	8.293	8.631	9.156	9.252	9.358	9.418	9.424	9.461	9.484	9.504	10.207	10.254	10.337	10.585	10.632	10.751	10.987	11.073	11.12	11.213	11.295	11.342	11.372	11.707	11.717	11.733	11.747	12.062	12.195	12.291	12.334	12.42	12.44	12.506	12.546
S-043	5.219	5.545	6.679	6.819	7.17	7.21	7.233	7.399	7.419	7.469	7.558	7.767	7.837	8.043	8.292	8.623	9.151	9.25	9.357	9.413	9.423	9.463	9.486	9.503	10.209	10.256	10.335	10.591	10.634	10.75	10.982	11.072	11.118	11.211	11.291	11.344	11.37	11.696	11.715	11.732	11.745	12.061	12.187	12.286	12.333	12.416	12.439	12.505	12.545
S-003	5.241	5.572	6.687	6.833	7.172	7.215	7.235	7.404	7.427	7.473	7.56	7.772	7.838	8.041	8.293	8.628	9.146	9.248	9.358	9.421	9.421	9.457	9.484	9.501	10.207	10.254	10.337	10.586	10.635	10.745	10.987	NA	11.116	11.213	11.292	11.342	11.368	11.7	11.71	11.733	11.747	12.062	12.185	12.287	12.334	12.42	12.44	12.503	12.543
S-046	5.241	5.576	6.694	6.84	7.179	7.222	7.242	7.411	7.431	7.477	7.564	7.779	7.842	8.045	8.293	8.625	9.153	9.252	9.358	9.418	9.421	9.465	9.484	9.501	10.208	10.258	10.337	10.589	10.632	10.745	10.984	11.074	11.117	11.213	11.293	11.342	11.372	11.704	11.721	11.734	11.747	12.059	12.188	12.288	12.331	12.414	12.437	12.504	12.543
S-106	5.215	5.53	6.665	6.807	7.159	7.205	7.225	7.391	7.415	7.461	7.551	7.766	7.833	8.042	8.294	8.629	9.153	9.253	9.359	9.415	9.422	9.462	9.485	9.505	10.208	10.258	10.337	10.546	10.629	10.745	10.984	11.077	11.117	11.213	11.286	11.343	11.369	11.704	11.714	11.731	11.751	12.063	12.189	12.288	12.331	12.418	12.438	12.504	12.544
S-085	5.225	5.55	6.685	6.834	7.173	7.216	7.239	7.405	7.428	7.471	7.561	7.77	7.84	8.045	8.294	8.629	9.153	9.253	9.359	9.419	9.425	9.462	9.489	9.505	10.208	10.255	10.338	10.583	10.633	10.749	10.985	11.071	11.118	11.214	11.293	11.343	11.37	11.701	11.718	11.728	11.748	12.06	12.186	12.285	12.332	12.418	12.438	12.504	12.544
S-067	5.244	5.575	6.693	6.833	7.178	7.221	7.241	7.41	7.43	7.476	7.563	7.778	7.841	8.044	8.293	8.628	9.155	9.251	9.358	9.417	9.424	9.46	9.487	9.5	10.207	10.253	10.336	10.585	10.632	10.748	10.987	11.073	11.116	11.206	11.288	11.342	11.371	11.697	11.716	11.733	11.75	12.065	12.188	12.287	12.334	12.417	12.436	12.503	12.543
S-057	5.239	5.578	6.693	6.832	7.177	7.213	7.24	7.409	7.429	7.472	7.562	7.774	7.844	8.046	8.295	8.627	9.151	9.251	9.36	9.416	9.423	9.456	9.486	9.499	10.206	10.252	10.335	10.581	10.631	10.75	10.986	11.072	11.118	11.211	11.294	11.344	11.371	11.699	11.716	11.732	11.745	12.057	12.183	12.283	12.333	12.416	12.439	12.502	12.545
S-294	5.214	5.529	6.67	6.813	7.168	7.208	7.228	7.393	7.42	7.466	7.553	7.768	7.838	8.044	8.293	8.628	9.152	9.251	9.361	9.421	9.424	9.46	9.48	9.503	10.207	10.253	10.336	10.592	10.632	10.748	10.987	NA	11.119	11.212	11.288	11.342	11.371	11.703	11.723	11.736	11.75	12.061	12.188	12.287	12.334	12.42	NA	12.503	12.543
S-225	5.257	5.582	6.696	6.832	7.178	7.221	7.241	7.41	7.433	7.479	7.566	7.775	7.848	8.047	8.296	8.631	9.155	9.251	9.361	9.417	9.424	9.46	9.483	9.503	10.207	10.253	10.336	10.582	10.631	10.747	10.983	11.073	11.119	11.212	11.292	11.341	11.368	11.703	11.716	11.729	11.749	12.058	12.187	12.287	12.33	12.416	12.439	12.502	12.546
S-322	5.219	5.531	6.669	6.809	7.16	7.203	7.227	7.396	7.416	7.462	7.552	7.767	7.837	8.039	8.295	8.63	9.154	9.25	9.357	9.416	9.423	9.466	9.483	9.503	10.209	10.252	10.335	10.591	10.631	10.75	10.986	11.085	11.118	11.218	11.294	11.344	11.37	11.702	11.715	11.732	11.749	12.064	12.19	12.286	12.333	12.419	12.439	12.505	12.545
S-005	5.217	5.538	6.68	6.816	7.171	7.211	7.231	7.396	7.42	7.466	7.556	7.778	7.841	8.043	8.292	8.631	9.158	9.251	9.357	9.417	9.424	9.463	9.48	9.503	10.21	10.253	10.336	10.555	10.634	10.744	10.983	11.076	11.119	11.212	11.291	11.344	11.368	11.699	11.716	11.733	11.746	12.058	12.187	12.287	12.33	12.419	12.453	12.502	12.542
S-016	5.216	5.532	6.673	6.815	7.167	7.204	7.227	7.393	7.416	7.462	7.555	7.771	7.834	8.043	8.292	8.627	9.151	9.251	9.357	9.417	9.423	9.46	9.48	9.5	10.21	10.259	10.336	10.591	10.631	10.747	10.986	NA	11.119	11.208	11.291	11.341	11.371	11.702	11.716	11.732	11.749	12.064	12.184	12.286	12.333	12.416	12.439	12.505	12.542
S-049	5.211	5.546	6.678	6.833	7.172	7.212	7.235	7.401	7.427	7.47	7.56	7.772	7.839	8.044	8.293	8.628	9.153	9.252	9.358	9.411	9.421	9.464	NA	9.504	10.208	10.257	10.337	10.589	10.632	10.748	10.987	11.074	11.117	11.213	11.289	11.342	11.365	11.701	11.714	11.73	11.747	12.059	12.185	12.281	12.331	12.417	12.437	12.503	12.543
S-054	5.219	5.531	6.669	6.808	7.16	7.206	7.229	7.392	7.415	7.462	7.551	7.764	7.84	8.039	8.294	8.626	9.154	9.25	9.359	9.419	9.422	9.459	9.485	9.502	10.209	10.255	10.335	10.594	10.633	10.749	10.985	11.088	11.118	11.214	11.294	11.34	11.37	11.708	11.715	11.732	11.745	12.063	12.186	12.286	12.329	12.415	12.438	12.501	12.541
S-063	5.221	5.53	6.658	6.807	7.155	7.202	7.225	7.391	7.414	7.461	7.55	7.776	7.832	8.038	8.293	8.625	9.156	9.249	9.358	9.415	9.421	9.458	9.484	9.501	10.208	10.251	10.337	10.593	10.632	10.745	10.987	NA	11.117	11.213	11.293	11.342	11.369	11.704	11.717	11.734	11.747	12.056	12.185	12.288	12.331	12.417	12.437	12.504	12.543
S-102	5.216	5.542	6.68	6.822	7.171	7.214	7.234	7.399	7.426	7.469	7.559	7.771	7.837	8.043	8.292	8.627	9.151	9.251	9.36	9.417	9.423	9.466	9.486	9.503	10.21	10.253	10.339	10.584	10.634	10.747	10.986	11.075	11.119	11.215	11.291	11.341	11.371	11.703	11.716	11.729	11.749	12.061	12.19	12.286	12.333	12.419	12.439	12.505	12.545
S-103	5.254	5.579	6.693	6.826	7.178	7.221	7.241	7.41	7.433	7.476	7.563	7.778	7.848	8.047	8.299	8.631	9.152	9.251	9.358	9.417	9.424	9.457	9.49	9.504	10.21	10.25	10.336	10.588	10.632	10.744	10.987	11.073	11.119	11.209	11.292	11.342	11.371	11.707	11.713	11.733	11.746	12.058	12.188	12.284	12.334	12.417	12.44	12.503	12.543
S-120	5.217	5.529	6.664	6.81	7.158	7.208	7.228	7.394	7.42	7.464	7.553	7.765	7.838	8.041	8.293	8.625	9.156	9.252	9.358	9.418	9.424	9.461	9.484	9.504	10.207	10.254	10.337	10.585	10.635	10.748	10.984	11.08	11.12	11.213	11.295	11.342	11.372	11.7	11.72	11.733	11.747	12.059	12.188	12.287	12.334	12.417	12.44	12.506	12.543
S-145	5.218	5.536	6.668	6.814	7.162	7.202	7.225	7.391	7.414	7.461	7.55	7.769	7.832	8.038	8.29	8.625	9.153	9.249	9.358	9.415	9.421	9.464	9.484	9.501	10.208	10.251	10.334	10.586	10.629	10.748	10.984	NA	11.12	11.213	11.292	11.342	11.372	11.707	11.72	11.727	11.747	12.059	12.185	12.284	12.331	12.417	12.437	12.503	12.543
S-154	5.222	5.531	6.662	6.814	7.16	7.206	7.226	7.395	7.415	7.461	7.551	7.767	7.836	8.042	8.294	8.629	9.153	9.25	9.359	9.419	9.422	9.462	9.482	9.502	10.209	10.255	10.335	10.59	10.633	10.749	10.985	11.081	11.118	11.214	11.293	11.34	11.373	11.708	11.718	11.731	11.745	12.063	12.189	12.289	12.332	12.418	12.441	12.501	12.544
S-156	5.225	5.534	6.668	6.804	7.163	7.202	7.226	7.391	7.418	7.461	7.551	7.766	7.836	8.038	8.291	8.626	9.147	9.249	9.359	9.415	9.422	9.465	9.485	9.502	10.208	10.258	10.338	10.583	10.633	10.746	10.988	NA	11.117	11.21	11.29	11.343	11.373	11.711	11.718	11.731	11.748	12.06	12.186	12.285	12.332	12.415	12.438	12.504	12.544
S-159	5.221	5.53	6.661	6.804	7.159	7.199	7.222	7.388	7.414	7.458	7.547	7.763	7.836	8.038	8.294	8.629	9.153	9.249	9.359	9.418	9.422	9.458	9.485	9.501	10.208	10.254	10.334	10.586	10.633	10.745	10.984	NA	11.117	11.213	11.29	11.343	11.369	11.701	11.711	11.734	11.747	12.059	12.185	12.285	12.331	12.414	12.441	12.501	12.544
S-174	5.221	5.529	6.661	6.81	7.155	7.201	7.225	7.39	7.417	7.46	7.55	7.762	7.832	8.041	8.293	8.621	9.152	9.252	9.358	9.418	9.421	9.461	9.484	9.501	10.207	10.257	10.337	10.595	10.632	10.748	10.984	NA	11.116	11.209	11.292	11.342	11.372	11.703	11.717	11.733	11.747	12.062	12.185	12.284	12.334	12.417	12.44	12.503	12.543
S-191	5.221	5.543	6.681	6.824	7.172	7.212	7.235	7.404	7.424	7.467	7.56	7.772	7.839	8.041	8.293	8.625	9.153	9.252	9.355	9.418	9.421	9.458	9.481	9.501	10.208	10.254	10.337	10.586	10.629	10.745	10.984	11.074	11.117	11.216	11.293	11.342	11.369	11.704	11.717	11.73	11.747	12.059	12.185	12.285	12.331	12.417	12.44	12.503	12.543
S-206	5.232	5.56	6.682	6.824	7.173	7.209	7.236	7.402	7.425	7.471	7.561	7.773	7.843	8.042	8.294	8.629	9.15	9.25	9.359	9.416	9.422	9.459	9.482	9.502	10.205	10.255	10.338	10.583	10.63	10.746	10.985	11.071	11.118	11.214	11.287	11.343	11.373	11.705	11.718	11.731	11.748	12.06	12.186	12.285	12.332	12.418	12.438	12.504	12.544
S-214	5.253	5.575	6.693	6.833	7.178	7.221	7.241	7.41	7.433	7.476	7.566	7.775	7.844	8.043	8.292	8.627	9.152	9.251	9.361	9.417	9.424	9.463	9.483	9.503	10.207	10.253	10.336	10.588	10.631	10.747	10.983	11.073	11.116	11.209	11.292	11.341	11.368	11.706	11.716	11.733	11.746	12.058	12.187	12.29	12.33	12.416	12.439	12.502	12.542
S-270	5.215	5.53	6.671	6.811	7.162	7.206	7.226	7.395	7.418	7.464	7.554	7.77	7.836	8.042	8.291	8.626	9.15	9.249	9.355	9.415	9.422	9.465	9.485	9.501	10.205	10.255	10.338	10.59	10.629	10.746	10.984	11.074	11.117	11.21	11.296	11.343	11.373	11.704	11.714	11.734	11.748	12.063	12.186	12.285	12.331	12.418	12.441	12.504	12.544
S-285	5.228	5.547	6.681	6.824	7.166	7.209	7.232	7.398	7.421	7.468	7.554	7.77	7.836	8.038	8.29	8.625	9.146	9.249	9.355	9.415	9.422	9.458	9.488	9.498	10.208	10.251	10.337	10.593	10.633	10.749	10.981	NA	11.117	11.207	11.29	11.343	11.373	11.698	11.721	11.731	11.747	12.059	12.185	12.288	12.331	12.414	12.438	12.504	12.544
S-299	5.214	5.54	6.678	6.84	7.169	7.212	7.235	7.401	7.424	7.467	7.557	7.772	7.835	8.044	8.293	8.628	9.156	9.255	9.358	9.418	9.425	9.464	9.484	9.504	10.208	10.254	10.337	10.582	10.632	10.745	10.984	11.073	11.117	11.213	11.289	11.349	11.375	11.704	11.717	11.73	11.747	12.062	12.188	12.288	12.331	12.417	12.44	12.503	12.543
S-313	5.227	5.546	6.687	6.83	7.175	7.218	7.238	7.407	7.427	7.473	7.563	7.772	7.841	8.044	8.293	8.628	9.155	9.255	9.358	9.417	9.421	9.464	9.484	9.5	10.207	10.253	10.336	10.582	10.632	10.744	10.983	11.073	11.116	11.219	11.292	11.342	11.372	11.7	11.713	11.73	11.746	12.062	12.188	12.287	12.334	12.417	12.44	12.503	12.546
S-323	5.228	5.546	6.684	6.827	7.175	7.215	7.238	7.404	7.424	7.474	7.56	7.772	7.839	8.045	8.293	8.628	9.153	9.249	9.358	9.415	9.421	9.465	9.481	9.501	10.208	10.254	10.337	10.583	10.632	10.745	10.984	11.077	11.117	11.216	11.289	11.342	11.372	11.707	11.714	11.734	11.747	12.059	12.188	12.288	12.331	12.414	12.441	12.507	12.543
S-332	5.216	5.544	6.679	6.822	7.17	7.21	7.233	7.402	7.422	7.469	7.558	7.77	7.84	8.042	8.291	8.626	9.151	9.25	9.36	9.419	9.423	9.456	9.486	9.499	10.209	10.252	10.338	10.587	10.634	10.75	10.985	11.072	11.118	11.214	11.291	11.344	11.367	11.702	11.715	11.732	11.745	12.057	12.186	12.283	12.332	12.415	12.438	12.505	12.545
S-352	5.215	5.54	6.674	6.817	7.165	7.205	7.229	7.394	7.418	7.464	7.554	7.769	7.836	8.041	8.294	8.629	9.149	9.249	9.355	9.415	9.422	9.458	9.481	9.501	10.208	10.254	10.337	10.589	10.629	10.745	10.984	11.074	11.117	11.21	11.289	11.342	11.372	11.704	11.714	11.731	11.744	12.059	12.189	12.285	12.331	12.417	12.437	12.504	12.543
S-407	5.218	5.53	6.665	6.807	7.162	7.205	7.225	7.394	7.418	7.461	7.55	7.769	7.832	8.041	8.294	8.629	9.153	9.252	9.355	9.415	9.422	9.458	9.485	9.504	10.208	10.258	10.337	10.589	10.629	10.749	10.984	NA	11.117	11.213	11.289	11.342	11.372	11.704	11.714	11.727	11.747	12.062	12.185	12.288	12.331	12.417	12.437	12.5	12.543
S-260	5.216	5.532	6.646	6.802	7.154	7.197	7.224	7.386	7.413	7.456	7.545	7.768	7.831	8.04	8.292	8.624	9.151	9.251	9.357	9.417	9.423	9.463	9.483	9.5	10.206	10.249	10.336	10.591	10.628	10.747	10.986	11.082	11.119	11.215	11.291	11.344	11.374	11.709	11.712	11.729	11.746	12.058	12.184	12.283	12.333	12.416	12.439	12.505	12.542
S-410	5.218	5.546	6.678	6.827	7.169	7.212	7.235	7.401	7.424	7.467	7.557	7.772	7.835	8.041	8.29	8.625	9.149	9.249	9.358	9.418	9.421	9.464	9.481	9.501	10.208	10.254	10.337	10.589	10.632	10.748	10.981	11.074	11.117	11.206	11.289	11.346	11.369	11.697	11.714	11.73	11.747	12.062	12.188	12.288	12.331	12.417	12.44	12.504	12.543
S-105	5.22	5.548	6.683	6.822	7.174	7.21	7.237	7.406	7.423	7.469	7.559	7.771	7.841	8.043	8.292	8.627	9.151	9.251	9.357	9.417	9.423	9.466	9.483	9.503	10.206	10.253	10.339	10.581	10.628	10.75	10.986	11.072	11.119	11.212	11.291	11.344	11.371	11.696	11.716	11.729	11.749	12.061	12.187	12.29	12.333	12.416	12.439	12.505	12.542
S-344	5.251	5.58	6.691	6.837	7.175	7.219	7.245	7.408	7.431	7.477	7.567	7.773	7.842	8.045	8.294	8.629	9.156	9.256	9.355	9.418	9.422	9.461	9.481	9.505	10.208	10.251	10.337	10.586	10.629	10.745	10.984	11.074	11.117	11.22	11.296	11.343	11.369	11.701	11.717	11.727	11.747	12.059	12.185	12.285	12.331	12.417	12.437	12.504	12.544
S-254	5.219	5.531	6.662	6.801	7.156	7.2	7.223	7.389	7.415	7.458	7.548	7.77	7.833	8.039	8.291	8.626	9.154	9.25	9.356	9.416	9.419	9.466	9.482	9.502	10.205	10.255	10.338	10.584	10.63	10.75	10.985	11.085	11.118	11.207	11.29	11.343	11.373	11.705	11.715	11.735	11.745	12.063	12.186	12.286	12.332	12.418	12.442	12.505	12.544
S-325	5.24	5.578	6.69	6.839	7.174	7.221	7.244	7.41	7.433	7.476	7.562	7.778	7.844	8.047	8.296	8.624	9.152	9.251	9.357	9.417	9.424	9.46	9.483	9.503	10.207	10.253	10.336	10.585	10.631	10.744	10.986	11.069	11.119	11.209	11.292	11.341	11.371	11.7	11.713	11.733	11.746	12.061	12.184	12.284	12.33	12.416	12.44	12.503	12.542
S-359	5.222	5.531	6.669	6.811	7.166	7.203	7.229	7.395	7.422	7.465	7.551	7.764	7.833	8.042	8.291	8.626	9.15	9.25	9.356	9.416	9.419	9.462	9.482	9.502	10.205	10.252	10.335	10.587	10.627	10.746	10.985	NA	11.118	11.214	11.294	11.34	11.367	11.702	11.712	11.728	11.745	12.06	12.186	12.282	12.332	12.412	12.435	12.501	12.538
S-264	5.217	5.549	6.683	6.829	7.174	7.214	7.237	7.407	7.427	7.47	7.563	7.772	7.841	8.044	8.292	8.628	9.152	9.251	9.354	9.414	9.424	9.46	9.487	9.5	10.207	10.253	10.336	10.588	10.631	10.744	10.983	11.073	11.116	11.212	11.292	11.341	11.368	11.703	11.716	11.73	11.746	12.058	12.184	12.287	12.33	12.416	12.436	12.503	12.542
S-282	5.248	5.577	6.695	6.831	7.176	7.219	7.242	7.408	7.431	7.478	7.564	7.773	7.843	8.045	8.294	8.629	9.153	9.253	9.359	9.415	9.422	9.462	9.485	9.505	10.208	10.258	10.337	10.586	10.633	10.749	10.988	11.074	11.117	11.21	11.286	11.343	11.369	11.704	11.718	11.731	11.744	12.059	12.185	12.282	12.331	12.414	12.438	12.504	12.544
S-378	5.218	5.529	6.664	6.81	7.158	7.205	7.225	7.394	7.417	7.46	7.553	7.769	7.835	8.041	8.29	8.625	9.152	9.249	9.358	9.418	9.424	9.464	9.481	9.501	10.207	10.25	10.337	10.586	10.632	10.748	10.984	11.077	11.116	11.209	11.292	11.342	11.369	11.7	11.714	11.734	11.75	12.062	12.188	12.284	12.331	12.417	12.44	12.507	12.543
S-348	5.218	5.53	6.668	6.81	7.159	7.202	7.225	7.391	7.414	7.461	7.55	7.763	7.836	8.038	8.29	8.625	9.153	9.252	9.358	9.415	9.421	9.461	9.484	9.501	10.204	10.254	10.337	10.583	10.632	10.745	10.987	NA	11.117	11.22	11.296	11.339	11.369	11.704	11.717	11.731	11.747	12.059	12.185	12.285	12.328	12.414	12.437	12.504	12.543
S-278	5.225	5.56	6.691	6.83	7.175	7.215	7.238	7.408	7.431	7.474	7.564	7.776	7.846	8.045	8.297	8.629	9.149	9.252	9.358	9.415	9.425	9.465	9.485	9.501	10.208	10.254	10.337	10.583	10.632	10.745	10.984	11.074	11.117	11.21	11.289	11.342	11.369	11.701	11.714	11.731	11.747	12.059	12.185	12.285	12.331	12.417	12.437	12.504	12.543
S-221	5.213	5.538	6.676	6.818	7.167	7.206	7.23	7.396	7.422	7.465	7.555	7.77	7.837	8.039	8.291	8.626	9.151	9.25	9.356	9.416	9.423	9.459	9.479	9.502	10.206	10.252	10.335	10.581	10.63	10.746	10.985	11.072	11.118	11.211	11.287	11.34	11.37	11.702	11.712	11.729	11.745	12.057	12.186	12.283	12.332	12.415	12.432	12.502	12.541
S-220	5.213	5.542	6.676	6.819	7.171	7.21	7.234	7.399	7.423	7.469	7.555	7.774	7.837	8.043	8.292	8.624	9.151	9.251	9.357	9.417	9.423	9.466	9.483	9.503	10.206	10.253	10.336	10.584	10.631	10.747	10.986	11.072	11.115	11.215	11.291	11.341	11.371	11.703	11.716	11.732	11.746	12.061	12.187	12.286	12.333	12.416	12.436	12.502	12.542
S-341	5.22	5.535	6.673	6.816	7.168	7.204	7.231	7.397	7.42	7.466	7.553	7.768	7.841	8.04	8.296	8.624	9.152	9.251	9.357	9.417	9.42	9.464	9.484	9.503	10.207	10.253	10.336	10.585	10.631	10.748	10.983	11.073	11.116	11.215	11.288	11.341	11.368	11.7	11.716	11.723	11.746	12.058	12.184	12.287	12.33	12.42	12.436	12.503	12.542
S-338	5.252	5.583	6.695	6.841	7.179	7.219	7.246	7.408	7.431	7.478	7.564	7.776	7.843	8.045	8.297	8.626	9.153	9.249	9.356	9.419	9.422	9.462	9.485	9.502	10.205	10.251	10.334	10.586	10.63	10.746	10.985	11.071	11.117	11.214	11.293	11.34	11.363	11.708	11.718	11.731	11.748	12.056	12.186	12.285	12.332	12.415	12.438	12.501	12.541
S-358	5.219	5.531	6.649	6.802	7.157	7.196	7.223	7.386	7.412	7.455	7.548	7.767	7.833	8.039	8.291	8.623	9.154	9.25	9.356	9.416	9.423	9.456	9.482	9.502	10.209	10.255	10.335	10.591	10.634	10.746	10.982	11.075	11.115	11.208	11.287	11.34	11.37	11.705	11.715	11.728	11.745	12.057	12.183	12.283	12.329	12.412	12.438	12.502	12.541
S-287	5.22	5.545	6.68	6.819	7.171	7.211	7.234	7.403	7.423	7.47	7.556	7.772	7.838	8.044	8.292	8.628	9.152	9.251	9.357	9.414	9.424	9.464	9.483	9.503	10.207	10.25	10.336	10.582	10.631	10.748	10.983	11.073	11.116	11.212	11.288	11.341	11.371	11.703	11.716	11.73	11.746	12.058	12.184	12.287	12.33	12.416	12.436	12.503	12.542
S-321	5.231	5.54	6.688	6.83	7.175	7.215	7.238	7.404	7.431	7.467	7.56	7.779	7.842	8.044	8.29	8.628	9.153	9.249	9.355	9.415	9.421	9.461	9.484	9.501	10.204	10.251	10.334	10.586	10.629	10.745	10.984	11.07	11.117	11.213	11.289	11.339	11.366	11.701	11.714	11.727	11.747	12.059	12.185	12.285	12.331	12.411	12.437	12.5	12.543
S-246	5.219	5.531	6.662	6.815	7.157	7.2	7.223	7.389	7.415	7.458	7.548	7.767	7.833	8.039	8.288	8.626	9.154	9.25	9.36	9.416	9.423	9.466	9.479	9.502	10.209	10.255	10.338	10.584	10.63	10.75	10.982	11.071	11.118	11.217	11.29	11.344	11.37	11.702	11.718	11.732	11.745	12.06	12.183	12.282	12.332	12.415	12.435	12.501	12.541
S-244	5.218	5.53	6.661	6.814	7.162	7.202	7.225	7.391	7.418	7.461	7.554	7.766	7.832	8.038	8.293	8.628	9.149	9.249	9.355	9.418	9.421	9.458	9.481	9.504	10.204	10.251	10.334	10.589	10.629	10.745	10.984	NA	11.117	11.21	11.293	11.339	11.366	11.694	11.714	11.731	11.747	12.056	12.182	12.285	12.328	12.417	12.437	12.5	12.54
S-289	5.244	5.576	6.69	6.83	7.175	7.218	7.241	7.407	7.43	7.477	7.563	7.775	7.842	8.044	8.293	8.628	9.149	9.248	9.358	9.418	9.421	9.454	9.484	9.497	10.204	10.254	10.337	10.582	10.629	10.745	10.98	11.07	11.116	11.206	11.289	11.339	11.368	11.707	11.713	11.73	11.743	12.055	12.181	12.284	12.331	12.413	12.437	12.503	12.54
S-247	5.214	5.53	6.664	6.81	7.159	7.205	7.228	7.391	7.417	7.461	7.55	7.762	7.832	8.041	8.29	8.625	9.153	9.249	9.355	9.415	9.421	9.458	9.484	9.498	10.208	10.251	10.334	10.579	10.629	10.745	10.984	11.07	11.117	11.21	11.286	11.339	11.372	11.701	11.714	11.727	11.747	12.056	12.185	12.284	12.328	12.417	12.437	12.503	12.54
S-327	5.215	5.53	6.665	6.814	7.159	7.199	7.225	7.388	7.415	7.458	7.547	7.763	7.836	8.038	8.29	8.626	9.15	9.253	9.359	9.415	9.422	9.455	9.481	9.501	10.208	10.255	10.337	10.586	10.629	10.746	10.984	11.074	11.117	11.21	11.293	11.343	11.369	11.701	11.714	11.728	11.747	12.056	12.185	12.285	12.328	12.418	12.438	12.501	12.54
S-025	5.217	5.529	6.66	6.803	7.158	7.197	7.221	7.386	7.413	7.456	7.546	7.771	7.834	8.037	8.289	8.621	9.151	9.248	9.354	9.417	9.42	9.46	9.48	9.5	10.206	10.253	10.336	10.585	10.631	10.747	10.983	NA	11.116	11.212	11.291	11.341	11.371	11.699	11.716	11.729	11.746	12.054	12.184	12.283	12.33	12.416	12.436	12.502	12.542
S-231	5.22	5.545	6.68	6.823	7.171	7.214	7.237	7.403	7.423	7.469	7.559	7.775	7.838	8.043	8.292	8.624	9.155	9.251	9.357	9.414	9.42	9.463	9.48	9.5	10.207	10.253	10.336	10.585	10.631	10.747	10.983	11.072	11.116	11.215	11.291	11.341	11.368	11.7	11.713	11.729	11.746	12.058	12.184	12.283	12.33	12.416	12.439	12.502	12.542
S-074	5.245	5.574	6.689	6.831	7.173	7.216	7.239	7.405	7.425	7.472	7.561	7.77	7.84	8.042	8.291	8.626	9.15	9.25	9.356	9.413	9.419	9.459	9.482	9.502	10.205	10.252	10.335	10.59	10.63	10.746	10.982	11.071	11.115	11.217	11.29	11.34	11.37	11.698	11.718	11.732	11.745	12.06	12.183	12.286	12.329	12.412	12.432	12.501	12.541
S-108	5.242	5.574	6.692	6.831	7.176	7.219	7.239	7.408	7.428	7.471	7.561	7.773	7.84	8.042	8.294	8.626	9.15	9.246	9.359	9.416	9.419	9.455	9.482	9.502	10.205	10.252	10.335	10.583	10.63	10.746	10.982	11.071	11.114	11.21	11.29	11.34	11.373	11.698	11.718	11.728	11.741	12.056	12.183	12.282	12.329	12.415	12.438	12.501	12.541
S-162	5.194	5.572	6.69	6.839	7.174	7.217	7.241	7.406	7.43	7.476	7.562	7.778	7.841	8.043	8.292	8.627	9.152	9.251	9.354	9.414	9.42	9.46	9.48	9.503	10.207	10.253	10.336	10.588	10.628	10.747	10.983	11.073	11.116	11.212	11.288	11.338	11.371	11.706	11.716	11.729	11.743	12.058	12.184	12.283	12.327	12.413	12.436	12.502	12.542
S-116	5.241	5.573	6.687	6.83	7.175	7.218	7.238	7.407	7.427	7.474	7.56	7.772	7.842	8.041	8.29	8.625	9.153	9.249	9.355	9.415	9.421	9.454	9.481	9.501	10.204	10.251	10.334	10.586	10.629	10.748	10.981	11.073	11.117	11.206	11.289	11.339	11.369	11.697	11.714	11.73	11.747	12.059	12.182	12.281	12.328	12.414	12.437	12.5	12.54
S-098	5.213	5.531	6.666	6.802	7.157	7.2	7.223	7.386	7.412	7.456	7.545	7.767	7.83	8.033	8.288	8.62	9.154	9.247	9.357	9.413	9.42	9.456	9.483	9.499	10.206	10.252	10.335	10.587	10.631	10.743	10.986	11.075	11.115	11.205	11.287	11.341	11.37	11.706	11.715	11.732	11.745	12.061	12.183	12.286	12.326	12.416	12.435	12.502	12.538
S-276	5.217	5.536	6.67	6.816	7.165	7.204	7.231	7.393	7.417	7.46	7.549	7.768	7.831	8.037	8.289	8.624	9.152	9.251	9.354	9.414	9.421	9.46	9.484	9.5	10.204	10.253	10.336	10.588	10.632	10.748	10.983	11.079	11.116	11.209	11.292	11.338	11.371	11.703	11.72	11.73	11.743	12.058	12.188	12.284	12.33	12.416	12.44	12.503	12.543
S-147	5.245	5.574	6.688	6.831	7.176	7.219	7.239	7.405	7.425	7.471	7.561	7.77	7.84	8.042	8.288	8.626	9.153	9.25	9.356	9.416	9.419	9.462	9.479	9.499	10.205	10.252	10.335	10.587	10.63	10.746	10.982	11.071	11.114	11.21	11.29	11.34	11.366	11.695	11.715	11.728	11.745	12.053	12.183	12.285	12.329	12.411	12.435	12.501	12.541
S-055	5.222	5.551	6.682	6.821	7.173	7.213	7.236	7.402	7.425	7.468	7.558	7.774	7.837	8.042	8.294	8.626	9.15	9.247	9.356	9.416	9.419	9.456	9.482	9.499	10.205	10.252	10.332	10.584	10.63	10.746	10.985	11.071	11.115	11.214	11.287	11.34	11.37	11.702	11.715	11.728	11.742	12.057	12.183	12.286	12.329	12.415	12.435	12.501	12.541
S-406	5.215	5.527	6.659	6.811	7.156	7.199	7.223	7.388	7.412	7.458	7.548	7.76	7.833	8.039	8.291	8.623	9.153	9.25	9.356	9.416	9.422	9.462	9.479	9.502	10.205	10.252	10.335	10.58	10.63	10.746	10.978	11.074	11.114	11.207	11.29	11.34	11.37	11.705	11.711	11.725	11.745	12.056	12.183	12.282	12.329	12.411	12.435	12.501	12.541
S-050	5.219	5.531	6.652	6.802	7.153	7.197	7.22	7.386	7.409	7.455	7.542	7.771	7.834	8.036	8.288	8.62	9.154	9.247	9.356	9.416	9.419	9.459	9.479	9.499	10.206	10.252	10.332	10.584	10.627	10.743	10.985	NA	11.115	11.214	11.287	11.34	11.367	11.702	11.712	11.725	11.745	12.057	12.183	12.283	12.329	12.409	12.432	12.498	12.541
S-415	5.224	5.539	6.671	6.81	7.162	7.202	7.225	7.391	7.414	7.46	7.547	7.759	7.829	8.038	8.287	8.622	9.149	9.245	9.355	9.411	9.421	9.458	9.481	9.494	10.204	10.251	10.334	10.582	10.632	10.742	10.984	NA	11.117	11.209	11.289	11.339	11.365	11.697	11.714	11.73	11.744	12.059	12.182	12.284	12.328	12.414	12.437	12.5	12.54
S-208	5.215	5.527	6.655	6.808	7.153	7.199	7.222	7.385	7.411	7.455	7.544	7.766	7.829	8.035	8.287	8.622	9.15	9.253	9.356	9.415	9.419	9.462	9.482	9.498	10.205	10.251	10.334	10.593	10.63	10.742	10.985	11.081	11.114	11.21	11.287	11.34	11.373	11.698	11.715	11.731	11.744	12.056	12.182	12.282	12.328	12.415	12.438	12.501	12.541
S-184	5.25	5.572	6.686	6.836	7.174	7.217	7.237	7.403	7.426	7.473	7.559	7.775	7.841	8.043	8.292	8.627	9.151	9.248	9.357	9.413	9.42	9.467	9.483	9.503	10.206	10.253	10.336	10.581	10.628	10.747	10.983	11.069	11.115	11.205	11.288	11.338	11.368	11.699	11.716	11.726	11.746	12.058	12.184	12.283	12.33	12.416	12.436	12.502	12.539
S-012	5.217	5.528	6.656	6.802	7.154	7.197	7.224	7.386	7.41	7.456	7.546	7.761	7.834	8.037	8.289	8.624	9.148	9.248	9.354	9.413	9.42	9.46	9.48	9.496	10.203	10.253	10.336	10.588	10.631	10.744	10.983	11.072	11.115	11.215	11.288	11.338	11.368	11.706	11.716	11.729	11.746	12.058	12.184	12.283	12.33	12.413	12.436	12.502	12.542
S-095	5.216	5.548	6.683	6.829	7.171	7.214	7.237	7.403	7.426	7.469	7.559	7.774	7.841	8.043	8.292	8.627	9.155	9.247	9.357	9.417	9.42	9.453	9.48	9.5	10.206	10.253	10.332	10.581	10.631	10.744	10.983	11.072	11.115	11.208	11.288	11.341	11.367	11.699	11.712	11.729	11.746	12.054	12.184	12.283	12.33	12.413	12.436	12.502	12.542
S-197	5.222	5.527	6.659	6.801	7.156	7.196	7.223	7.385	7.412	7.455	7.544	7.76	7.83	8.035	8.288	8.619	9.147	9.25	9.356	9.416	9.419	9.449	9.482	9.499	10.205	10.252	10.335	10.583	10.63	10.743	10.982	11.071	11.114	11.21	11.287	11.34	11.366	11.698	11.715	11.728	11.745	12.056	12.183	12.279	12.329	12.411	12.435	12.501	12.541
S-143	5.249	5.57	6.688	6.841	7.176	7.216	7.239	7.405	7.428	7.471	7.561	7.777	7.84	8.042	8.294	8.626	9.15	9.246	9.359	9.416	9.419	9.455	9.482	9.499	10.205	10.248	10.335	10.58	10.63	10.746	10.982	11.071	11.114	11.21	11.287	11.34	11.37	11.698	11.715	11.728	11.745	12.056	12.183	12.279	12.329	12.415	12.435	12.498	12.538
S-084	5.221	5.529	6.66	6.803	7.158	7.201	7.224	7.387	7.414	7.457	7.55	7.769	7.835	8.037	8.286	8.628	9.152	9.248	9.354	9.414	9.421	9.461	9.481	9.497	10.207	10.25	10.333	10.582	10.632	10.745	10.98	11.08	11.116	11.206	11.289	11.338	11.365	11.7	11.717	11.727	11.747	12.058	12.184	12.281	12.327	12.413	12.437	12.5	12.539
S-302	5.236	5.534	6.686	6.835	7.173	7.217	7.24	7.406	7.426	7.469	7.562	7.774	7.84	8.043	8.291	8.623	9.151	9.247	9.356	9.413	9.419	9.456	9.479	9.499	10.206	10.252	10.335	10.581	10.63	10.74	10.982	11.072	11.115	11.204	11.287	11.337	11.364	11.699	11.712	11.732	11.745	12.057	12.183	12.283	12.329	12.412	12.442	12.502	12.538
S-279	5.22	5.552	6.686	6.826	7.171	7.214	7.237	7.403	7.426	7.469	7.559	7.768	7.841	8.043	8.295	8.63	9.151	9.248	9.354	9.417	9.42	9.463	9.483	9.496	10.206	10.253	10.336	10.585	10.631	10.747	10.983	11.069	11.115	11.208	11.288	11.338	11.371	11.699	11.719	11.729	11.746	12.058	12.184	12.283	12.326	12.416	12.439	12.502	12.539
S-295	5.248	5.576	6.691	6.834	7.179	7.219	7.242	7.408	7.431	7.474	7.564	7.773	7.842	8.045	8.294	8.625	9.153	9.249	9.355	9.415	9.422	9.461	9.481	9.501	10.208	10.251	10.337	10.586	10.629	10.742	10.981	11.071	11.114	11.25	11.286	11.343	11.369	11.698	11.714	11.731	11.744	12.056	12.185	12.285	12.328	12.414	12.437	12.501	12.54
S-210	5.249	5.574	6.692	6.838	7.177	7.216	7.24	7.406	7.429	7.472	7.561	7.78	7.837	8.043	8.295	8.623	9.151	9.247	9.356	9.416	9.419	9.456	9.482	9.499	10.206	10.249	10.335	10.584	10.63	10.746	10.982	11.068	11.115	11.211	11.294	11.34	11.367	11.705	11.712	11.728	11.745	12.057	12.183	12.283	12.329	12.415	12.435	12.502	12.541
S-019	5.215	5.527	6.665	6.804	7.156	7.202	7.225	7.391	7.414	7.461	7.55	7.766	7.832	8.038	8.29	8.625	9.149	9.249	9.355	9.415	9.422	9.461	9.481	9.498	10.205	10.251	10.334	10.586	10.633	10.745	10.981	11.084	11.114	11.203	11.286	11.339	11.369	11.697	11.717	11.727	11.744	12.056	12.182	12.281	12.328	12.411	12.434	12.5	12.54
S-027	5.242	5.57	6.688	6.834	7.173	7.216	7.239	7.405	7.431	7.474	7.561	7.776	7.843	8.042	8.294	8.622	9.15	9.249	9.356	9.415	9.419	9.455	9.482	9.498	10.205	10.251	10.334	10.58	10.63	10.746	10.978	11.071	11.114	11.207	11.287	11.34	11.369	11.698	11.711	11.731	11.741	12.056	12.182	12.282	12.328	12.415	12.434	12.501	12.541
S-058	5.243	5.568	6.686	6.826	7.174	7.217	7.237	7.406	7.426	7.473	7.562	7.781	7.841	8.043	8.292	8.627	9.151	9.248	9.357	9.413	9.42	9.46	9.483	9.5	10.203	10.25	10.336	10.581	10.628	10.747	10.983	11.072	11.115	11.205	11.288	11.338	11.368	11.703	11.713	11.729	11.746	12.054	12.184	12.283	12.326	12.413	12.436	12.499	12.539
S-205	5.217	5.529	6.66	6.803	7.155	7.201	7.221	7.39	7.414	7.457	7.55	7.765	7.828	8.037	8.293	8.621	9.149	9.248	9.354	9.411	9.421	9.454	NA	9.497	10.207	10.25	10.333	10.582	10.632	10.745	10.98	11.08	11.116	11.216	11.292	11.338	11.368	11.7	11.713	11.727	11.743	12.055	12.184	12.281	12.327	12.413	12.437	12.5	12.539
S-293	5.221	5.549	6.684	6.823	7.171	7.211	7.234	7.4	7.424	7.47	7.56	7.772	7.838	8.041	8.293	8.625	9.149	9.248	9.354	9.414	9.421	9.454	9.484	9.5	10.207	10.25	10.33	10.582	10.628	10.745	10.983	11.07	11.116	11.202	11.292	11.338	11.372	11.7	11.713	11.73	11.743	12.058	12.184	12.277	12.327	12.417	12.433	12.503	12.539
S-241	5.217	5.529	6.663	6.823	7.161	7.201	7.227	7.393	7.416	7.46	7.553	7.768	7.831	8.04	8.292	8.624	9.158	9.268	9.357	9.42	9.424	9.467	9.47	9.503	10.21	10.256	10.339	10.595	10.638	10.747	10.983	11.076	11.116	11.209	11.292	11.341	11.375	11.703	11.716	11.73	11.743	12.058	12.184	12.284	12.33	12.416	12.443	12.499	12.542
C-310	5.21	5.529	6.677	6.816	7.164	7.207	7.227	7.393	7.42	7.46	7.552	7.761	7.831	8.037	8.286	8.614	9.145	9.241	9.354	9.407	9.414	9.457	9.477	9.497	10.2	10.246	10.329	10.578	10.625	10.741	10.976	11.066	11.109	11.205	11.288	11.335	11.361	11.696	11.703	11.723	11.739	12.055	12.181	12.277	12.327	12.41	12.429	12.496	12.536
C-312	5.247	5.578	6.687	6.819	7.168	7.211	7.234	7.4	7.423	7.466	7.556	7.765	7.834	8.037	8.286	8.617	9.148	9.241	9.354	9.407	9.414	9.454	9.477	9.49	10.2	10.243	10.329	10.578	10.625	10.741	10.976	11.066	11.109	11.199	11.278	11.335	11.361	11.696	11.713	11.723	11.739	12.055	12.177	12.274	12.327	12.403	12.43	12.493	12.536
C-316	5.243	5.588	6.697	6.829	7.174	7.214	7.237	7.403	7.426	7.473	7.559	7.765	7.831	8.037	8.286	8.617	9.142	9.241	9.357	9.407	9.414	9.45	9.473	9.493	10.2	10.25	10.329	10.582	10.625	10.741	10.976	11.069	11.109	11.202	11.282	11.338	11.365	11.693	11.706	11.72	11.739	12.051	12.177	12.274	12.327	12.406	12.43	12.493	12.536
C-317	5.239	5.581	6.689	6.822	7.17	7.213	7.236	7.399	7.422	7.469	7.555	7.771	7.834	8.036	8.285	8.617	9.144	9.244	9.356	9.406	9.413	9.453	9.476	9.492	10.199	10.246	10.329	10.581	10.624	10.74	10.972	11.065	11.108	11.201	11.281	11.337	11.364	11.695	11.705	NA	11.739	12.054	12.176	12.276	12.326	12.405	12.429	12.495	12.531
C-320	5.203	5.534	6.672	6.812	7.16	7.203	7.226	7.392	7.412	7.462	7.548	7.764	7.83	8.033	8.288	8.616	9.144	9.244	9.356	9.406	9.413	9.453	9.476	9.492	10.199	10.245	10.328	10.584	10.624	10.737	10.975	11.065	11.108	11.201	11.291	11.334	11.36	11.699	11.712	11.748	11.738	12.05	12.18	12.276	12.326	12.409	12.429	12.495	12.531
C-321	5.253	5.582	6.69	6.829	7.171	7.214	7.237	7.4	7.423	7.469	7.556	7.775	7.838	8.037	8.286	8.617	9.148	9.241	9.354	9.407	9.414	9.453	9.473	9.49	10.2	10.243	10.329	10.568	10.625	10.744	10.973	11.066	11.109	11.202	11.281	11.335	11.361	11.696	11.706	11.723	11.743	12.051	12.177	12.273	12.327	12.406	12.429	12.496	12.532
C-322	5.236	5.578	6.686	6.822	7.167	7.214	7.237	7.4	7.423	7.466	7.555	7.764	7.837	8.037	8.289	8.62	9.145	9.238	9.357	9.41	9.413	9.45	9.473	9.493	10.2	10.249	10.329	10.581	10.624	10.737	10.973	11.066	11.109	11.212	11.285	11.334	11.361	11.693	11.709	11.719	11.739	12.054	12.177	12.277	12.326	12.409	12.429	12.496	12.532
C-324	5.209	5.534	6.678	6.811	7.163	7.209	7.229	7.395	7.418	7.465	7.551	7.763	7.833	8.032	8.284	8.619	9.14	9.236	9.356	9.406	9.412	9.445	9.472	9.495	10.199	10.245	10.331	10.58	10.62	10.736	10.972	11.064	11.108	11.204	11.287	11.333	11.363	11.698	11.708	11.725	11.738	12.05	12.176	12.272	12.325	12.408	12.425	12.494	12.534
C-325	5.211	5.539	6.68	6.816	7.165	7.208	7.231	7.397	7.414	7.463	7.553	7.769	7.828	8.034	8.283	8.621	9.145	9.242	9.358	9.404	9.414	9.451	9.47	9.494	10.197	10.244	10.326	10.575	10.622	10.738	10.973	11.066	11.109	11.202	11.282	11.335	11.362	11.7	11.707	11.723	11.74	12.048	12.178	12.274	12.327	12.407	12.427	12.493	12.533
C-326	5.204	5.522	6.66	6.796	7.151	7.194	7.218	7.38	7.403	7.45	7.539	7.752	7.818	8.027	8.283	8.611	9.142	9.235	9.351	9.401	9.411	9.447	9.474	9.487	10.197	10.243	10.33	10.578	10.622	10.738	10.973	NA	11.106	11.199	11.278	11.335	11.361	11.693	11.706	11.726	11.74	12.051	12.174	12.274	12.324	12.406	12.426	12.493	12.533
C-327	5.237	5.576	6.687	6.823	7.168	7.211	7.235	7.401	7.42	7.467	7.556	7.769	7.829	8.034	8.286	8.615	9.146	9.242	9.355	9.404	9.411	9.451	9.474	9.491	10.197	10.244	10.33	10.576	10.622	10.742	10.974	11.063	11.106	11.199	11.276	11.332	11.362	11.694	11.704	11.72	11.737	12.052	12.175	12.274	12.324	12.407	12.427	12.493	12.533
S-001	5.204	5.526	6.674	6.81	7.161	7.201	7.225	7.39	7.414	7.46	7.55	7.762	7.828	8.034	8.286	8.615	9.139	9.242	9.355	9.408	9.414	9.447	9.474	9.491	10.197	10.247	10.33	10.575	10.622	10.738	10.977	11.063	11.106	11.199	11.282	11.335	11.362	11.7	11.71	11.72	11.737	12.055	12.181	12.274	12.324	12.407	12.427	12.493	12.533
S-004	5.209	5.524	6.659	6.808	7.15	7.193	7.216	7.378	7.405	7.448	7.538	7.75	7.816	8.025	8.281	8.609	9.144	9.24	9.349	9.406	9.409	9.449	9.472	9.492	10.199	10.245	10.328	10.58	10.623	10.736	10.975	NA	11.108	11.197	11.283	11.33	11.36	11.698	11.708	11.725	11.738	12.047	12.179	12.272	12.325	12.408	12.428	12.494	12.534
S-009	5.206	5.541	6.679	6.822	7.163	7.206	7.23	7.396	7.419	7.462	7.555	7.767	7.83	8.036	8.288	8.616	9.144	9.244	9.356	9.406	9.413	9.456	9.472	9.492	10.199	10.245	10.332	10.581	10.624	10.74	10.975	11.065	11.108	11.201	11.281	11.337	11.36	11.699	11.709	11.722	11.738	12.05	12.183	12.279	12.322	12.409	12.432	12.495	12.535
S-015	5.213	5.521	6.669	6.805	7.16	7.204	7.223	7.389	7.413	7.459	7.545	7.761	7.827	8.03	8.282	8.62	9.141	9.241	9.35	9.406	9.413	9.453	9.47	9.489	10.199	10.243	10.329	10.574	10.624	10.74	10.972	11.062	11.108	11.201	11.281	11.334	11.361	11.696	11.706	11.722	11.736	12.047	12.177	12.276	12.323	12.406	12.426	12.495	12.532
S-020	5.241	5.576	6.687	6.823	7.168	7.211	7.235	7.397	7.42	7.467	7.557	7.766	7.835	8.034	8.283	8.618	9.146	9.242	9.355	9.408	9.414	9.451	9.471	9.494	10.201	10.244	10.33	10.576	10.625	10.738	10.977	11.067	11.106	11.199	11.282	11.332	11.359	11.687	11.707	11.72	11.74	12.049	12.178	12.274	12.324	12.407	12.427	12.493	12.533
S-022	5.207	5.528	6.676	6.812	7.164	7.204	7.227	7.396	7.416	7.459	7.549	7.765	7.831	8.033	8.285	8.614	9.141	9.241	9.354	9.407	9.414	9.453	9.473	9.493	10.2	10.243	10.329	10.575	10.621	10.737	10.973	11.062	11.106	11.202	11.285	11.331	11.361	11.693	11.709	11.723	11.743	12.048	12.177	12.27	12.326	12.403	12.429	12.496	12.532
S-023	5.241	5.576	6.688	6.83	7.172	7.209	7.235	7.401	7.424	7.467	7.557	7.766	7.832	8.035	8.284	8.615	9.146	9.242	9.355	9.408	9.412	9.451	9.471	9.491	10.198	10.244	10.327	10.576	10.623	10.735	10.974	11.067	11.107	11.203	11.279	11.333	11.362	11.691	11.704	11.721	11.737	12.052	12.179	12.278	12.325	12.411	12.431	12.494	12.534
S-028	5.244	5.576	6.687	6.82	7.168	7.211	7.231	7.397	7.42	7.464	7.556	7.765	7.832	8.034	8.283	8.618	9.142	9.242	9.355	9.404	9.411	9.448	9.477	9.491	10.197	10.244	10.33	10.576	10.622	10.741	10.974	11.067	11.106	11.196	11.279	11.332	11.362	11.69	11.71	11.727	11.74	12.052	12.181	12.278	12.324	12.407	12.43	12.493	12.533
S-031	5.236	5.578	6.686	6.819	7.167	7.21	7.234	7.396	7.423	7.466	7.556	7.765	7.831	8.037	8.285	8.62	9.141	9.238	9.354	9.403	9.41	9.45	9.473	9.493	10.196	10.24	10.326	10.575	10.621	10.734	10.973	11.062	11.105	11.202	11.281	11.331	11.361	11.693	11.706	11.719	11.739	12.051	12.18	12.277	12.323	12.406	12.426	12.492	12.532
S-035	5.21	5.518	6.646	6.792	7.144	7.187	7.207	7.373	7.396	7.442	7.532	7.751	7.821	8.026	8.278	8.617	9.138	9.241	9.35	9.406	9.41	9.453	9.476	9.489	10.199	10.242	10.329	10.584	10.621	10.737	10.976	11.069	11.108	11.201	11.281	11.334	11.361	11.702	11.706	11.722	11.735	12.047	12.18	12.276	12.323	12.409	12.429	12.495	12.532
S-037	5.207	5.525	6.667	6.806	7.158	7.201	7.224	7.39	7.413	7.456	7.546	7.762	7.828	8.034	8.282	8.618	9.145	9.241	9.354	9.404	9.411	9.447	9.474	9.493	10.2	10.243	10.33	10.578	10.625	10.734	10.973	11.066	11.109	NA	11.285	11.335	11.361	11.7	11.706	11.723	11.74	12.048	12.181	12.274	12.327	12.41	12.43	12.493	12.536
S-042	5.21	5.522	6.66	6.806	7.148	7.194	7.214	7.384	7.403	7.45	7.539	7.755	7.818	8.027	8.279	8.614	9.139	9.241	9.351	9.407	9.414	9.45	9.47	9.494	10.197	10.24	10.33	10.575	10.622	10.738	10.973	NA	11.109	11.199	11.279	11.335	11.361	11.693	11.707	11.72	11.74	12.052	12.178	12.274	12.324	12.407	12.426	12.496	12.536
S-045	5.207	5.525	6.673	6.819	7.158	7.207	7.227	7.393	7.416	7.459	7.549	7.761	7.828	8.033	8.286	8.614	9.145	9.241	9.354	9.407	9.414	9.447	9.47	9.49	10.2	10.243	10.329	10.575	10.621	10.737	10.976	11.062	11.106	11.205	11.281	11.331	11.361	11.693	11.706	11.723	11.743	12.048	12.181	12.277	12.323	12.409	12.429	12.492	12.532
S-051	5.236	5.571	6.682	6.822	7.163	7.21	7.23	7.399	7.416	7.462	7.552	7.761	7.83	8.036	8.285	8.61	9.141	9.237	9.353	9.403	9.41	9.453	9.439	9.492	10.199	10.246	10.329	NA	10.62	10.733	10.972	11.062	11.105	11.194	11.277	11.334	11.364	11.695	11.702	11.722	11.739	12.05	12.176	12.276	12.322	12.405	12.425	12.495	12.535
S-052	5.233	5.568	6.682	6.815	7.167	7.207	7.227	7.396	7.416	7.462	7.552	7.757	7.83	8.033	8.278	8.613	9.141	9.24	9.353	9.403	9.413	9.453	9.473	9.489	10.199	10.242	10.329	10.574	10.621	10.74	10.972	11.062	11.108	11.201	11.287	11.334	11.364	11.692	11.705	11.719	11.739	12.05	12.18	12.273	12.326	12.405	12.429	12.495	12.532
S-062	5.235	5.57	6.684	6.824	7.165	7.209	7.232	7.398	7.421	7.464	7.554	7.769	7.829	8.035	8.28	8.615	9.139	9.242	9.352	9.405	9.412	9.448	9.475	9.491	10.198	10.244	10.327	10.579	10.622	10.739	10.974	11.064	11.107	11.2	11.279	11.332	11.366	11.687	11.704	11.724	11.737	12.049	12.178	12.278	12.324	12.407	12.427	12.494	12.533
S-065	5.208	5.52	6.658	6.797	7.149	7.192	7.212	7.378	7.401	7.448	7.537	7.75	7.816	8.025	8.277	8.612	9.143	9.239	9.349	9.405	9.412	9.452	9.475	9.491	10.198	10.251	10.327	NA	10.623	10.742	10.978	NA	11.107	11.2	11.283	11.333	11.363	11.698	11.714	11.721	11.741	12.053	12.175	12.275	12.325	12.404	12.428	12.494	12.534
S-066	5.235	5.57	6.682	6.814	7.166	7.209	7.232	7.398	7.418	7.468	7.554	7.767	7.83	8.032	8.287	8.616	9.143	9.24	9.352	9.405	9.412	9.445	9.472	9.488	10.198	10.242	10.328	10.577	10.623	10.736	10.975	11.064	11.107	11.2	11.28	11.333	11.36	11.688	11.705	11.728	11.738	12.05	12.179	12.272	12.325	12.405	12.425	12.491	12.531
S-071	5.2	5.515	6.65	6.796	7.147	7.191	7.214	7.376	7.403	7.449	7.539	7.758	7.828	8.03	8.279	8.617	9.145	9.238	9.35	9.403	9.41	9.453	9.473	9.49	10.2	10.246	10.329	10.575	10.624	10.737	10.976	11.066	11.105	11.198	11.278	11.331	11.361	11.696	11.713	11.719	11.739	12.048	12.177	12.27	12.323	12.406	12.429	12.492	12.532
S-077	5.206	5.528	6.666	6.798	7.147	7.19	7.216	7.382	7.402	7.449	7.538	7.757	7.824	8.026	8.278	8.613	9.137	9.237	9.35	9.403	9.409	9.446	9.466	9.492	10.196	10.242	10.328	10.574	10.62	10.733	10.975	NA	11.105	11.194	11.281	11.33	11.357	11.692	11.705	11.725	11.742	12.05	12.176	12.276	12.322	12.402	12.429	12.495	12.531
S-081	5.199	5.53	6.678	6.814	7.159	7.203	7.226	7.392	7.412	7.461	7.548	7.767	7.826	8.032	8.284	8.613	9.143	9.236	9.356	9.406	9.409	9.452	9.475	9.492	10.195	10.242	10.325	10.577	10.623	10.736	10.975	11.064	11.108	11.2	11.283	11.333	11.363	11.698	11.705	11.721	11.735	12.05	12.176	12.275	12.325	12.405	12.428	12.494	12.534
S-082	5.197	5.519	6.667	6.806	7.158	7.201	7.221	7.387	7.41	7.456	7.546	7.755	7.825	8.03	8.282	8.617	9.142	9.238	9.351	9.404	9.41	9.45	9.473	9.49	10.197	10.246	10.326	10.575	10.621	10.741	10.97	NA	11.106	11.199	11.282	11.335	11.361	11.69	11.703	11.72	11.739	12.045	12.177	12.277	12.323	12.41	12.429	12.493	12.532
S-088	5.208	5.526	6.661	6.807	7.152	7.195	7.215	7.384	7.404	7.45	7.54	7.756	7.819	8.024	8.276	8.608	9.142	9.239	9.348	9.404	9.411	9.448	9.471	9.491	10.197	10.24	10.327	10.576	10.622	10.735	10.974	11.067	11.106	11.199	11.276	11.332	11.359	11.69	11.707	11.72	11.737	12.049	12.178	12.278	12.324	12.41	12.433	12.497	12.536
S-089	5.211	5.519	6.654	6.79	7.145	7.188	7.208	7.374	7.397	7.444	7.533	7.745	7.822	8.024	8.276	8.611	9.146	9.238	9.348	9.401	9.411	9.457	9.474	9.491	10.197	10.237	10.327	10.582	10.622	10.738	10.974	NA	11.106	11.196	11.279	11.332	11.362	11.694	11.71	11.72	11.733	12.052	12.175	12.271	12.324	12.404	12.427	12.493	12.533
S-091	5.209	5.517	6.655	6.788	7.146	7.189	7.212	7.378	7.402	7.445	7.534	7.753	7.82	8.029	8.277	8.613	9.147	9.236	9.352	9.402	9.412	9.445	9.472	9.488	10.198	10.241	10.328	10.573	10.623	10.736	10.975	11.068	11.107	11.197	11.283	11.33	11.36	11.695	11.705	11.721	11.738	12.05	12.176	12.272	12.325	12.405	12.428	12.491	12.531
S-096	5.244	5.582	6.687	6.826	7.168	7.214	7.234	7.4	7.42	7.47	7.556	7.769	7.832	8.037	8.286	8.618	9.142	9.238	9.354	9.404	9.411	9.454	9.47	9.49	10.197	10.244	10.326	10.572	10.622	10.741	10.973	11.063	11.106	11.199	11.275	11.332	11.362	11.69	11.707	11.723	11.736	12.045	12.178	12.274	12.324	12.407	12.427	12.493	12.533
S-097	5.243	5.578	6.69	6.829	7.171	7.211	7.234	7.4	7.423	7.466	7.556	7.771	7.838	8.037	8.286	8.621	9.145	9.238	9.351	9.404	9.41	9.453	9.473	9.49	10.197	10.243	10.329	10.575	10.621	10.734	10.973	11.062	11.106	11.202	11.285	11.331	11.361	11.699	11.706	11.719	11.736	12.048	12.177	12.277	12.323	12.406	12.426	12.492	12.532
S-100	5.246	5.581	6.692	6.822	7.17	7.21	7.233	7.402	7.422	7.469	7.555	7.764	7.837	8.036	8.285	8.62	9.144	9.24	9.353	9.406	9.413	9.449	9.473	9.492	10.199	10.246	10.325	10.574	10.624	10.737	10.972	11.065	11.105	11.201	11.281	11.334	11.36	11.699	11.709	11.722	11.739	12.047	12.18	12.273	12.322	12.405	12.429	12.495	12.531
S-112	5.25	5.582	6.69	6.822	7.167	7.214	7.234	7.4	7.423	7.466	7.556	7.768	7.834	8.037	8.282	8.617	9.145	9.238	9.351	9.407	9.414	9.45	9.473	9.493	10.197	10.243	10.326	10.575	10.621	10.737	10.973	11.062	11.106	11.202	11.281	11.335	11.358	11.686	11.706	11.719	11.739	12.048	12.177	12.273	12.323	12.406	12.426	12.492	12.532
S-119	5.248	5.587	6.691	6.824	7.169	7.212	7.236	7.401	7.425	7.471	7.557	7.77	7.833	8.035	8.284	8.616	9.143	9.239	9.352	9.405	9.409	9.452	9.472	9.492	10.198	10.241	10.328	10.576	10.623	10.739	10.975	11.064	11.107	11.197	11.283	11.333	11.359	11.698	11.708	11.718	11.738	12.046	12.176	12.275	12.322	12.405	12.428	12.491	12.531
S-122	5.211	5.529	6.677	6.81	7.162	7.205	7.228	7.394	7.414	7.46	7.55	7.765	7.828	8.031	8.283	8.618	9.146	9.235	9.351	9.401	9.411	9.448	9.471	9.491	10.197	10.244	10.327	10.576	10.625	10.735	10.974	11.063	11.106	11.199	11.279	11.329	11.362	11.694	11.704	11.72	11.737	12.049	12.178	12.274	12.324	12.407	12.427	12.493	12.53
S-123	5.211	5.529	6.68	6.813	7.161	7.208	7.228	7.397	7.417	7.463	7.553	7.762	7.832	8.031	8.279	8.611	9.139	9.238	9.351	9.404	9.411	9.447	9.447	9.49	10.197	10.24	10.326	10.572	10.622	10.738	10.973	11.063	11.106	11.196	11.279	11.335	11.362	11.69	11.707	11.72	11.733	12.048	12.178	12.271	12.324	12.403	12.427	12.493	12.529
S-130	5.245	5.584	6.688	6.824	7.173	7.213	7.232	7.402	7.422	7.468	7.558	7.767	7.836	8.035	8.284	8.616	9.143	9.243	9.352	9.406	9.412	9.452	9.475	9.492	10.198	10.242	10.328	10.577	10.62	10.739	10.975	11.064	11.104	11.197	11.277	11.33	11.363	11.688	11.708	11.718	11.738	12.05	12.179	12.275	12.322	12.405	12.428	12.491	12.531
S-138	5.242	5.578	6.686	6.822	7.167	7.21	7.23	7.399	7.422	7.469	7.555	7.767	7.83	8.036	8.285	8.613	9.141	9.237	9.346	9.406	9.41	9.449	9.473	9.489	10.196	10.239	10.329	10.577	10.62	10.737	10.972	11.062	11.105	11.198	11.277	11.334	11.36	11.695	11.705	11.719	11.735	12.05	12.18	12.273	12.322	12.405	12.425	12.492	12.531
S-140	5.209	5.531	6.669	6.808	7.157	7.197	7.22	7.386	7.409	7.455	7.542	7.757	7.82	8.026	8.278	8.61	9.141	9.237	9.346	9.403	9.409	9.449	9.472	9.489	10.196	10.246	10.325	10.574	10.62	10.737	10.972	NA	11.105	11.198	11.277	11.33	11.357	11.695	11.705	11.722	11.735	12.047	12.18	12.276	12.319	12.405	12.429	12.495	12.531
S-144	5.238	5.58	6.685	6.817	7.169	7.212	7.232	7.398	7.421	7.464	7.554	7.763	7.833	8.032	8.284	8.616	9.14	9.236	9.349	9.405	9.409	9.445	9.472	9.491	10.198	10.241	10.324	10.576	10.619	10.736	10.974	11.064	11.107	11.2	11.276	11.329	11.359	11.698	11.704	11.721	11.738	12.046	12.175	12.272	12.321	12.401	12.428	12.487	12.53
S-148	5.204	5.529	6.677	6.819	7.161	7.204	7.227	7.39	7.416	7.46	7.549	7.761	7.828	8.034	8.282	8.617	9.142	9.238	9.354	9.407	9.41	9.447	9.473	9.49	10.2	10.243	10.326	10.575	10.621	10.734	10.973	11.063	11.106	11.199	11.282	11.335	11.361	11.69	11.71	11.719	11.739	12.051	12.181	12.274	12.323	12.406	12.429	12.493	12.532
S-155	5.207	5.525	6.677	6.813	7.161	7.204	7.227	7.393	7.416	7.463	7.552	7.765	7.828	8.03	8.282	8.614	9.142	9.238	9.347	9.404	9.41	9.447	9.473	9.49	10.197	10.243	10.326	10.575	10.621	10.734	10.973	11.063	11.106	11.202	11.278	11.331	11.361	11.686	11.703	11.723	11.736	12.048	12.177	12.274	12.32	12.406	12.43	12.493	12.532
S-165	5.206	5.511	6.649	6.789	7.144	7.184	7.207	7.373	7.399	7.442	7.532	7.748	7.811	8.026	8.278	8.617	9.144	9.237	9.35	9.403	9.41	9.446	9.473	9.489	10.196	10.239	10.325	10.571	10.621	10.74	10.972	NA	11.105	11.198	11.274	11.331	11.361	11.696	11.706	11.719	11.735	12.047	12.177	12.27	12.323	12.406	12.426	12.492	12.532
S-183	5.207	5.518	6.663	6.809	7.151	7.194	7.217	7.383	7.406	7.453	7.542	7.761	7.824	8.03	8.279	8.614	9.145	9.234	9.35	9.403	9.41	9.453	9.47	9.49	10.2	10.246	10.326	10.575	10.621	10.737	10.973	11.062	11.105	11.198	11.278	11.331	11.354	11.699	11.703	11.719	11.736	12.051	12.177	12.273	12.323	12.406	12.426	12.492	12.532
S-193	5.203	5.521	6.669	6.805	7.157	7.2	7.223	7.389	7.412	7.459	7.548	7.767	7.824	8.033	8.281	8.616	9.137	9.237	9.346	9.403	9.413	9.453	9.469	9.492	10.199	10.245	10.328	10.571	10.62	10.74	10.975	11.065	11.105	11.198	11.277	11.33	11.36	11.689	11.705	11.722	11.735	12.047	12.176	12.273	12.322	12.405	12.425	12.492	12.531
S-202	5.205	5.524	6.665	6.804	7.156	7.199	7.219	7.385	7.412	7.455	7.544	7.76	7.823	8.032	8.281	8.616	9.14	9.24	9.346	9.402	9.412	9.452	9.472	9.492	10.198	10.242	10.328	10.577	10.62	10.736	10.971	11.061	11.104	11.197	11.28	11.333	11.36	11.691	11.705	11.718	11.734	12.046	12.176	12.272	12.322	12.408	12.428	12.491	12.531
S-204	5.244	5.579	6.687	6.82	7.168	7.211	7.231	7.397	7.424	7.467	7.556	7.765	7.832	8.034	8.283	8.618	9.139	9.235	9.348	9.404	9.411	9.451	9.474	9.491	10.197	10.244	10.327	10.579	10.622	10.735	10.97	11.063	11.103	11.199	11.279	11.329	11.359	11.687	11.704	11.72	11.733	12.049	12.175	12.271	12.321	12.407	12.427	12.49	12.53
S-213	5.212	5.534	6.678	6.814	7.159	7.206	7.226	7.392	7.415	7.461	7.547	7.763	7.829	8.032	8.277	8.612	9.14	9.24	9.346	9.402	9.412	9.452	9.472	9.488	10.198	10.241	10.328	10.573	10.623	10.732	10.975	11.061	11.104	11.197	11.28	11.33	11.36	11.691	11.705	11.718	11.738	12.046	12.176	12.275	12.322	12.405	12.425	12.494	12.534
S-215	5.244	5.523	6.691	6.827	7.172	7.211	7.235	7.4	7.424	7.467	7.556	7.765	7.835	8.034	8.283	8.618	9.142	9.242	9.348	9.404	9.414	9.454	9.471	9.491	10.197	10.244	10.327	10.576	10.622	10.738	10.974	11.063	11.106	11.203	11.279	11.335	11.362	11.69	11.704	11.717	11.737	12.049	12.178	12.278	12.321	12.407	12.427	12.493	12.533
S-216	5.21	5.522	6.656	6.839	7.147	7.194	7.22	7.383	7.403	7.449	7.539	7.754	7.817	8.023	8.279	8.61	9.145	9.237	9.347	9.403	9.413	9.45	9.476	9.493	10.196	10.243	10.329	10.578	10.624	10.737	10.976	11.062	11.109	11.198	11.281	11.331	11.361	11.693	11.706	11.722	11.739	12.051	12.187	12.28	NA	12.436	12.429	12.525	12.558
S-243	5.204	5.516	6.69	6.786	7.138	7.181	7.204	7.37	7.397	7.44	7.53	7.752	7.815	8.024	8.279	8.611	9.142	9.238	9.348	9.404	9.411	9.454	9.474	9.49	10.197	10.243	10.326	10.572	10.622	10.738	10.977	11.063	11.106	11.202	11.282	11.332	11.365	11.697	11.7	11.72	11.733	12.045	12.178	12.277	12.32	12.41	12.43	12.493	12.533
S-249	5.202	5.531	6.669	6.811	7.16	7.2	7.223	7.389	7.412	7.458	7.545	7.764	7.827	8.029	8.281	8.616	9.14	9.237	9.346	9.402	9.409	9.449	9.472	9.489	10.195	10.242	10.325	10.577	10.62	10.736	10.975	11.061	11.104	11.197	11.277	11.33	11.363	11.692	11.702	11.722	11.735	12.05	12.173	12.272	12.319	12.405	12.425	12.491	12.531
S-251	5.202	5.517	6.662	6.808	7.153	7.196	7.219	7.385	7.408	7.455	7.544	7.76	7.826	8.029	8.281	8.619	9.14	9.236	9.349	9.406	9.409	9.449	9.472	9.492	10.195	10.245	10.328	10.577	10.62	10.739	10.972	11.061	11.104	11.197	11.28	11.33	11.36	11.695	11.705	11.721	11.735	12.047	12.176	12.275	12.319	12.405	12.425	12.491	12.531
S-252	5.235	5.51	6.678	6.817	7.159	7.205	7.225	7.394	7.414	7.461	7.547	7.763	7.829	8.028	8.28	8.615	9.14	9.239	9.349	9.402	9.412	9.451	9.471	9.488	10.195	10.244	10.324	10.573	10.619	10.739	10.971	11.064	11.107	11.197	11.279	11.329	11.362	11.691	11.701	11.717	11.734	12.046	12.175	12.275	12.321	12.407	12.427	12.49	12.53
C-016	5.229	5.574	6.685	6.818	7.163	7.209	7.229	7.395	7.418	7.461	7.551	7.763	7.826	8.032	8.284	8.619	9.137	9.236	9.346	9.406	9.409	9.452	9.472	9.489	10.195	10.242	10.328	10.573	10.623	10.736	10.972	11.061	11.104	11.194	11.28	11.33	11.36	11.692	11.698	11.745	11.738	12.047	12.173	12.275	12.319	12.405	12.428	12.491	12.531
C-377	5.24	5.569	6.683	6.823	7.168	7.208	7.231	7.397	7.42	7.463	7.553	7.765	7.828	8.034	8.283	8.614	9.142	9.245	9.351	9.407	9.411	9.454	9.474	9.49	10.2	10.24	10.33	10.582	10.625	10.738	10.977	11.063	11.106	11.202	11.278	11.335	11.368	11.693	11.703	11.72	11.736	12.048	12.178	12.277	12.32	12.406	12.43	12.493	12.533
C-288	5.206	5.518	6.669	6.812	7.157	7.2	7.22	7.386	7.409	7.455	7.545	7.754	7.824	8.029	8.281	8.613	9.141	9.237	9.35	9.403	9.409	9.443	9.469	9.489	10.196	10.242	10.325	10.574	10.62	10.737	10.975	11.062	11.105	11.201	11.274	11.33	11.357	11.692	11.705	11.719	11.735	12.047	12.173	12.273	12.322	12.405	12.425	12.492	12.531
C-076	5.208	5.53	6.671	6.814	7.159	7.202	7.225	7.388	7.411	7.457	7.547	7.759	7.825	8.031	8.28	8.615	9.139	9.239	9.348	9.401	9.408	9.448	9.471	9.491	10.194	10.241	10.327	10.576	10.619	10.738	10.974	11.06	11.103	11.21	11.279	11.332	11.359	11.694	11.704	11.72	11.734	12.046	12.175	12.275	12.321	12.404	12.427	12.49	12.53
C-267	5.236	5.571	6.682	6.822	7.167	7.207	7.23	7.396	7.419	7.462	7.552	7.764	7.83	8.033	8.282	8.613	9.144	9.237	9.35	9.403	9.41	9.446	9.473	9.489	10.196	10.242	10.329	10.571	10.621	10.737	10.969	11.062	11.105	11.198	11.277	11.331	11.357	11.692	11.705	11.722	11.739	12.05	12.177	12.273	12.323	12.405	12.425	12.492	12.532
C-171	5.205	5.523	6.661	6.81	7.152	7.192	7.215	7.381	7.404	7.451	7.54	7.753	7.822	8.028	8.277	8.612	9.139	9.239	9.348	9.402	9.408	9.448	9.471	9.491	10.198	10.241	10.327	10.576	10.622	10.735	10.974	11.064	11.104	11.2	11.279	11.332	11.359	11.691	11.704	11.721	11.734	12.049	12.178	12.271	12.321	12.407	12.427	12.494	12.533
C-177	5.237	5.572	6.687	6.833	7.165	7.211	7.235	7.401	7.42	7.467	7.553	7.762	7.829	8.038	8.286	8.615	9.142	9.239	9.351	9.408	9.411	9.451	9.474	9.494	10.197	10.244	10.327	10.572	10.622	10.735	10.97	11.063	11.106	11.199	11.276	11.332	11.362	11.69	11.707	11.72	11.737	12.049	12.178	12.271	12.324	12.417	12.434	12.506	12.546
C-209	5.204	5.533	6.674	6.813	7.162	7.205	7.225	7.39	7.414	7.46	7.55	7.762	7.825	8.031	8.28	8.618	9.142	9.238	9.351	9.401	9.408	9.451	9.471	9.491	10.194	10.24	10.323	10.575	10.622	10.735	10.974	11.06	11.103	11.199	11.279	11.329	11.358	11.693	11.703	11.717	11.733	12.045	12.178	12.271	12.321	12.403	12.43	12.493	12.533
C-212	5.207	5.525	6.676	6.812	7.157	7.201	7.224	7.386	7.413	7.459	7.546	7.761	7.824	8.03	8.279	8.617	9.141	9.241	9.35	9.404	9.407	9.443	9.47	9.49	10.193	10.243	10.326	10.575	10.621	10.734	10.973	11.062	11.106	11.198	11.281	11.331	11.358	11.699	11.703	11.719	11.736	12.048	12.171	12.27	12.323	12.406	12.426	12.492	12.532
C-107	5.237	5.579	6.687	6.82	7.168	7.211	7.235	7.397	7.417	7.467	7.557	7.766	7.835	8.034	8.283	8.615	9.142	9.239	9.351	9.404	9.408	9.448	9.468	9.491	10.197	10.241	10.323	10.569	10.619	10.735	10.97	11.063	11.106	11.196	11.279	11.329	11.359	11.69	11.704	11.724	11.737	12.052	12.171	12.271	12.324	12.404	12.424	12.49	12.53
C-075	5.244	5.576	6.688	6.817	7.169	7.212	7.235	7.398	7.418	7.464	7.557	7.763	7.832	8.031	8.283	8.615	9.146	9.236	9.352	9.405	9.408	9.455	9.475	9.491	10.198	10.244	10.327	10.576	10.622	10.735	10.971	11.064	11.104	11.2	11.276	11.329	11.359	11.691	11.707	11.727	11.737	12.049	12.175	12.271	12.321	12.404	12.424	12.494	12.53
C-360	5.207	5.525	6.696	6.822	7.161	7.207	7.231	7.393	7.42	7.463	7.549	7.768	7.831	8.03	8.279	8.614	9.138	9.238	9.351	9.404	9.407	9.45	9.447	9.49	10.193	10.24	10.326	10.578	10.618	10.731	10.97	NA	11.106	11.199	11.281	11.328	11.358	11.683	11.709	11.716	11.736	12.054	12.171	12.27	12.323	12.403	12.426	12.492	12.529
C-218	5.244	5.575	6.683	6.816	7.165	7.208	7.234	7.4	7.42	7.463	7.556	7.768	7.828	8.034	8.289	8.614	9.145	9.235	9.354	9.404	9.411	9.454	9.474	9.494	10.197	10.24	10.323	10.572	10.622	10.734	10.97	11.063	11.106	11.196	11.278	11.328	11.361	11.69	11.706	11.716	11.733	12.048	12.178	12.27	12.32	12.403	12.426	12.489	12.529
C-021	5.235	5.58	6.685	6.824	7.166	7.209	7.232	7.398	7.421	7.468	7.554	7.763	7.829	8.032	8.284	8.616	9.136	9.239	9.352	9.405	9.409	9.455	9.472	9.491	10.198	10.241	10.324	10.57	10.619	10.736	10.971	11.061	11.104	11.197	11.28	11.333	11.356	11.698	11.704	11.721	11.738	12.049	12.172	12.275	12.321	12.404	12.424	12.491	12.53
C-182	5.203	5.515	6.653	6.792	7.144	7.187	7.21	7.373	7.4	7.443	7.532	7.758	7.821	8.027	8.279	8.611	9.138	9.238	9.35	9.403	9.41	9.453	9.466	9.486	10.196	10.24	10.326	10.571	10.621	10.737	10.973	NA	11.105	11.198	11.278	11.328	11.358	11.686	11.706	11.723	11.736	12.044	12.177	12.27	12.32	12.406	12.426	12.492	12.532
C-330	5.238	5.58	6.691	6.831	7.169	7.209	7.235	7.398	7.421	7.468	7.554	7.76	7.833	8.032	8.284	8.616	9.146	9.239	9.352	9.405	9.409	9.458	9.472	9.492	10.195	10.241	10.328	10.576	10.62	10.739	10.971	11.064	11.104	11.2	11.28	11.33	11.359	11.694	11.704	11.721	11.738	12.046	12.176	12.275	12.322	12.404	12.428	12.491	12.531
C-064	5.243	5.575	6.69	6.829	7.168	7.211	7.234	7.397	7.42	7.463	7.553	7.765	7.828	8.034	8.282	8.614	9.145	9.238	9.354	9.404	9.41	9.45	9.47	9.49	10.193	10.24	10.323	10.575	10.621	10.738	10.973	11.063	11.106	11.199	11.282	11.328	11.358	11.686	11.706	11.72	11.736	12.051	12.174	12.27	12.323	12.403	12.423	12.489	12.532
C-243	5.249	5.58	6.688	6.824	7.166	7.213	7.232	7.398	7.422	7.468	7.558	7.763	7.836	8.035	8.284	8.616	9.143	9.24	9.353	9.402	9.409	9.449	9.472	9.489	10.195	10.242	10.328	10.573	10.62	10.733	10.972	11.064	11.104	11.197	11.277	11.33	11.36	11.692	11.705	11.721	11.735	12.043	12.176	12.272	12.322	12.405	12.425	12.491	12.531
S-343	5.242	5.58	6.688	6.834	7.166	7.212	7.236	7.402	7.421	7.465	7.557	7.763	7.833	8.035	8.284	8.616	9.143	9.24	9.352	9.405	9.409	9.449	9.468	9.492	10.195	10.241	10.324	10.577	10.623	10.736	10.968	11.064	11.104	11.197	11.277	11.33	11.36	11.688	11.705	11.721	11.734	12.046	12.176	12.275	12.322	12.405	12.425	12.491	12.531
S-245	5.248	5.583	6.688	6.83	7.169	7.212	7.235	7.401	7.421	7.467	7.557	7.766	7.832	8.035	8.284	8.615	9.143	9.239	9.349	9.405	9.412	9.448	9.471	9.491	10.198	10.241	10.324	10.573	10.619	10.735	10.971	11.064	11.104	11.2	11.28	11.329	11.359	11.691	11.701	11.721	11.737	12.049	12.179	12.275	12.321	12.408	12.427	12.494	12.534
S-170	5.216	5.534	6.669	6.812	7.157	7.2	7.22	7.389	7.409	7.455	7.542	7.754	7.824	8.026	8.275	8.607	9.137	9.237	9.346	9.403	9.409	9.449	9.469	9.486	10.196	10.242	10.325	10.571	10.62	10.733	10.972	NA	11.105	11.198	11.284	11.33	11.36	11.689	11.702	11.722	11.735	12.047	12.176	12.276	12.319	12.405	12.429	12.492	12.531
S-248	5.202	5.517	6.661	6.811	7.152	7.195	7.219	7.385	7.411	7.454	7.544	7.759	7.826	8.028	8.28	8.612	9.14	9.236	9.345	9.405	9.408	9.452	9.471	9.491	10.195	10.241	10.327	10.57	10.619	10.732	10.971	11.064	11.104	11.2	11.28	11.329	11.359	11.691	11.701	11.724	11.734	12.046	12.172	12.272	12.318	12.404	12.424	12.491	12.53
S-237	5.211	5.513	6.651	6.794	7.149	7.192	7.215	7.378	7.404	7.447	7.537	7.756	7.819	8.028	8.283	8.615	9.143	9.239	9.348	9.405	9.411	9.448	9.474	9.491	10.198	10.244	10.327	10.579	10.619	10.735	10.971	NA	11.103	11.203	11.276	11.329	11.359	11.691	11.704	11.72	11.737	12.046	12.175	12.274	12.321	12.407	12.427	12.49	12.53
S-297	5.244	5.582	6.687	6.82	7.171	7.211	7.231	7.4	7.42	7.467	7.556	7.765	7.832	8.034	8.283	8.611	9.139	9.238	9.348	9.404	9.411	9.451	9.471	9.49	10.197	10.24	10.326	10.575	10.622	10.735	10.973	11.06	11.103	11.199	11.279	11.328	11.362	11.69	11.703	11.72	11.737	12.048	12.178	12.274	12.32	12.407	12.427	12.493	12.533
S-292	5.208	5.52	6.658	6.811	7.146	7.192	7.215	7.378	7.401	7.448	7.534	7.753	7.816	8.022	8.274	8.606	9.14	9.236	9.345	9.402	9.412	9.448	9.472	9.488	10.195	10.241	10.324	10.573	10.619	10.736	10.971	NA	11.104	11.2	11.28	11.333	11.363	11.691	11.704	11.718	11.734	12.046	12.175	12.275	12.318	12.404	12.428	12.491	12.53
S-324	5.247	5.585	6.686	6.832	7.171	7.211	7.234	7.4	7.42	7.466	7.556	7.765	7.831	8.033	8.282	8.614	9.142	9.238	9.347	9.4	9.41	9.453	9.473	9.49	10.197	10.24	10.326	10.572	10.621	10.734	10.97	11.059	11.106	11.195	11.278	11.328	11.361	11.69	11.703	11.719	11.736	12.048	12.174	12.27	12.32	12.403	12.423	12.492	12.532
S-268	5.212	5.521	6.655	6.791	7.146	7.19	7.209	7.375	7.399	7.442	7.531	7.75	7.817	8.022	8.278	8.606	9.137	9.237	9.363	9.399	9.409	9.449	9.469	9.485	10.195	10.242	10.325	10.57	10.617	10.736	10.972	NA	11.104	11.194	11.277	11.33	11.36	11.688	11.702	11.718	11.732	12.043	12.173	12.272	12.322	12.402	12.425	12.491	12.528
S-069	5.241	5.516	6.687	6.836	7.165	7.211	7.231	7.397	7.42	7.467	7.553	7.765	7.835	8.034	8.283	8.615	9.142	9.238	9.348	9.404	9.411	9.447	9.471	9.491	10.194	10.237	10.323	10.572	10.619	10.738	10.97	11.063	11.103	11.199	11.279	11.329	11.358	11.694	11.707	11.72	11.737	12.049	12.175	12.271	12.321	12.404	12.423	12.49	12.53
S-291	5.206	5.518	6.649	6.792	7.144	7.187	7.21	7.373	7.396	7.442	7.532	7.751	7.817	8.023	8.272	8.607	9.141	9.237	9.347	9.403	9.41	9.446	9.466	9.489	10.196	10.239	10.325	10.581	10.621	10.737	10.972	NA	11.105	11.201	11.277	11.331	11.36	11.692	11.702	11.719	11.735	12.047	12.173	12.273	12.319	12.406	12.425	12.492	12.528
S-263	5.237	5.516	6.687	6.823	7.168	7.208	7.231	7.397	7.42	7.466	7.553	7.768	7.831	8.034	8.283	8.614	9.139	9.238	9.348	9.404	9.411	9.45	9.474	9.49	10.194	10.24	10.323	10.572	10.618	10.731	10.97	11.063	11.103	11.199	11.278	11.328	11.358	11.69	11.703	11.716	11.733	12.048	12.174	12.267	12.32	12.403	12.423	12.489	12.529
S-157	5.239	5.578	6.686	6.825	7.167	7.21	7.233	7.399	7.422	7.466	7.555	7.764	7.827	8.033	8.282	8.617	9.141	9.237	9.35	9.403	9.41	9.446	9.47	9.489	10.196	10.239	10.325	10.574	10.617	10.734	10.969	11.062	11.105	11.198	11.278	11.327	11.357	11.692	11.702	11.712	11.732	12.044	12.173	12.273	12.319	12.402	12.426	12.489	12.528
S-053	5.213	5.531	6.662	6.808	7.15	7.193	7.216	7.382	7.402	7.449	7.538	7.751	7.817	8.023	8.275	8.607	9.137	9.237	9.346	9.403	9.409	9.446	9.466	9.489	10.196	10.239	10.325	10.577	10.62	10.73	10.972	NA	11.102	11.234	11.277	11.33	11.357	11.692	11.702	11.719	11.735	12.047	12.173	12.273	12.319	12.405	12.425	12.492	12.528
S-146	5.243	5.578	6.686	6.832	7.167	7.211	7.231	7.396	7.423	7.463	7.552	7.761	7.831	8.033	8.282	8.614	9.138	9.234	9.347	9.4	9.407	9.447	9.47	9.487	10.193	10.243	10.323	10.571	10.618	10.734	10.973	11.062	11.102	11.195	11.275	11.328	11.358	11.69	11.699	11.716	11.736	12.048	12.174	12.27	12.32	12.403	12.423	12.489	12.529
S-094	5.232	5.571	6.682	6.818	7.167	7.206	7.23	7.396	7.419	7.462	7.551	7.767	7.83	8.033	8.278	8.613	9.141	9.237	9.346	9.403	9.409	9.449	9.472	9.489	10.196	10.242	10.322	10.571	10.62	10.733	10.972	11.058	11.101	11.198	11.277	11.327	11.357	11.689	11.705	11.718	11.735	12.047	12.173	12.269	12.319	12.402	12.425	12.492	12.528
S-079	5.21	5.519	6.653	6.803	7.148	7.187	7.211	7.377	7.4	7.446	7.536	7.755	7.815	8.027	8.279	8.614	9.138	9.235	9.347	9.4	9.407	9.447	9.47	9.49	10.197	10.24	10.323	10.572	10.618	10.737	10.97	NA	11.102	11.192	11.282	11.325	11.361	11.693	11.703	11.723	11.736	12.048	12.174	12.274	12.32	12.406	12.426	12.489	12.529
S-261	5.232	5.577	6.685	6.818	7.166	7.209	7.229	7.395	7.418	7.465	7.551	7.763	7.833	8.032	8.284	8.613	9.14	9.236	9.346	9.402	9.409	9.449	9.472	9.489	10.195	10.242	10.325	10.573	10.617	10.736	10.972	11.061	11.104	11.197	11.277	11.327	11.36	11.688	11.705	11.718	11.735	12.046	12.173	12.272	12.319	12.405	12.425	12.491	12.528
S-126	5.228	5.57	6.682	6.814	7.166	7.209	7.229	7.395	7.418	7.465	7.551	7.76	7.833	8.032	8.284	8.619	9.143	9.236	9.349	9.402	9.409	9.445	9.472	9.488	10.195	10.238	10.324	10.573	10.62	10.736	10.968	11.061	11.104	11.197	11.273	11.33	11.36	11.688	11.701	11.715	11.734	12.046	12.176	12.269	12.318	12.405	12.425	12.491	12.531
S-109	5.202	5.51	6.645	6.784	7.139	7.182	7.206	7.372	7.398	7.441	7.531	7.753	7.819	8.022	8.274	8.612	9.143	9.236	9.349	9.395	9.409	9.448	9.472	9.488	10.195	10.241	10.324	10.583	10.62	10.732	10.971	NA	11.104	11.194	11.28	11.33	11.356	11.694	11.704	11.718	11.738	12.043	12.172	12.272	12.322	12.404	12.424	12.487	12.531
S-125	5.231	5.567	6.681	6.821	7.166	7.209	7.229	7.395	7.418	7.464	7.551	7.763	7.829	8.032	8.284	8.616	9.14	9.236	9.352	9.402	9.408	9.452	9.472	9.488	10.195	10.241	10.324	10.573	10.619	10.739	10.971	11.061	11.104	11.197	11.276	11.329	11.356	11.688	11.701	11.721	11.738	12.046	12.172	12.272	12.321	12.404	12.424	12.487	12.53
C-084	NA	NA	NA	NA	NA	NA	NA	NA	NA	NA	NA	NA	NA	NA	NA	NA	NA	NA	NA	NA	NA	NA	NA	NA	NA	NA	NA	NA	NA	NA	NA	NA	NA	NA	NA	NA	NA	NA	NA	NA	NA	NA	NA	NA	NA	NA	NA	NA	NA
C-098	5.236	5.571	6.679	6.815	7.16	7.207	7.227	7.392	7.416	7.459	7.548	7.761	7.827	8.026	8.278	8.61	9.138	9.23	9.347	9.4	9.403	9.446	9.466	9.486	10.189	10.236	10.319	10.567	10.614	10.73	10.966	11.059	11.098	11.191	11.274	11.324	11.354	11.689	11.702	11.715	11.732	12.044	12.17	12.266	12.316	12.399	12.422	12.485	12.522
C-099	5.209	5.521	6.659	6.799	7.147	7.19	7.21	7.376	7.399	7.446	7.535	7.751	7.814	8.023	8.275	8.607	9.138	9.231	9.343	9.396	9.403	9.443	9.466	9.486	10.189	10.236	10.322	10.574	10.617	10.73	10.969	11.065	11.098	11.195	11.274	11.324	11.354	11.682	11.696	11.712	11.729	12.041	12.17	12.266	12.316	12.399	12.422	12.485	12.525
C-106	5.232	5.574	6.682	6.818	7.163	7.206	7.229	7.395	7.418	7.458	7.551	7.76	7.826	8.029	8.284	8.609	9.137	9.233	9.349	9.399	9.406	9.445	9.469	9.485	10.192	10.235	10.318	10.57	10.617	10.729	10.965	11.058	11.101	11.194	11.277	11.323	11.353	11.685	11.695	11.718	11.731	12.04	12.169	12.265	12.315	12.398	12.418	12.488	12.524
C-108	5.205	5.516	6.648	6.787	7.139	7.182	7.205	7.371	7.394	7.441	7.527	7.743	7.809	8.018	8.263	8.602	9.136	9.229	9.338	9.398	9.405	9.438	9.464	9.481	10.188	10.234	10.32	10.569	10.612	10.732	10.964	11.067	11.1	11.19	11.273	11.322	11.352	11.684	11.701	11.711	11.73	12.039	12.168	12.268	12.314	12.397	12.417	12.487	12.527
C-109	5.208	5.513	6.631	6.781	7.129	7.175	7.202	7.364	7.388	7.434	7.524	7.746	7.812	8.018	8.27	8.609	9.143	9.229	9.345	9.395	9.405	9.441	9.465	9.484	10.191	10.231	10.321	10.569	10.612	10.732	10.964	11.06	11.097	11.193	11.273	11.326	11.356	11.674	11.701	11.717	11.731	12.042	12.172	12.268	12.314	12.397	12.421	12.484	12.523
C-112	5.242	5.573	6.681	6.821	7.163	7.206	7.229	7.391	7.418	7.461	7.547	7.756	7.826	8.028	8.277	8.609	9.133	9.233	9.346	9.399	9.405	9.445	9.465	9.488	10.192	10.238	10.321	10.57	10.616	10.729	10.965	11.054	11.101	11.19	11.267	11.326	11.353	11.685	11.698	11.714	11.731	12.043	12.169	12.265	12.315	12.398	12.418	12.484	12.524
C-116	5.202	5.527	6.665	6.807	7.152	7.196	7.219	7.381	7.408	7.454	7.541	7.756	7.816	8.025	8.28	8.609	9.136	9.233	9.349	9.399	9.405	9.445	9.465	9.485	10.191	10.238	10.321	10.57	10.613	10.729	10.968	11.057	11.101	11.19	11.27	11.323	11.353	11.684	11.701	11.714	11.731	12.039	12.172	12.265	12.315	12.401	12.421	12.487	12.527
C-119	5.203	5.521	6.666	6.802	7.157	7.197	7.22	7.386	7.409	7.452	7.542	7.757	7.824	8.026	8.275	8.607	9.131	9.23	9.347	9.396	9.403	9.446	9.466	9.486	10.189	10.236	10.319	10.571	10.614	10.727	10.966	11.055	11.098	11.191	11.271	11.327	11.354	11.685	11.699	11.712	11.729	12.037	12.17	12.266	12.316	12.399	12.419	12.485	12.525
C-125	5.199	5.527	6.665	6.804	7.153	7.196	7.219	7.385	7.408	7.455	7.541	7.753	7.823	8.025	8.274	8.606	9.133	9.23	9.342	9.396	9.402	9.439	9.462	9.482	10.188	10.235	10.321	10.567	10.616	10.729	10.968	11.061	11.101	11.194	11.273	11.323	11.353	11.678	11.698	11.711	11.728	12.043	12.169	12.269	12.315	12.398	12.421	12.488	12.524
C-126	5.203	5.514	6.656	6.812	7.15	7.19	7.213	7.379	7.402	7.449	7.538	7.757	7.817	8.026	8.271	8.607	9.137	9.234	9.346	9.396	9.403	9.443	9.463	9.482	10.189	10.236	10.319	10.567	10.617	10.733	10.969	11.055	11.098	11.194	11.274	11.324	11.354	NA	11.699	11.709	11.729	12.044	12.17	12.266	12.316	12.399	12.419	12.485	12.525
C-022	5.239	5.574	6.682	6.824	7.163	7.206	7.229	7.392	7.418	7.461	7.548	7.763	7.823	8.029	8.278	8.609	9.134	9.23	9.346	9.399	9.402	9.442	9.469	9.482	10.189	10.235	10.321	10.573	10.613	10.729	10.965	11.055	11.098	11.191	11.273	11.327	11.353	11.688	11.698	11.711	11.728	12.04	12.169	12.265	12.315	12.398	12.418	12.484	12.524
C-038	5.244	5.576	6.684	6.83	7.162	7.205	7.228	7.394	7.417	7.46	7.55	7.762	7.828	8.031	8.276	8.608	9.136	9.232	9.345	9.398	9.404	9.444	9.464	9.484	10.191	10.237	10.32	10.569	10.612	10.731	10.967	11.057	11.1	11.193	11.272	11.322	11.352	11.684	11.697	11.71	11.73	12.042	12.171	12.271	12.317	12.403	12.423	12.486	12.526
C-062	5.237	5.576	6.681	6.813	7.162	7.205	7.228	7.394	7.414	7.46	7.55	7.759	7.825	8.028	8.28	8.612	9.136	9.232	9.341	9.398	9.404	9.444	9.464	9.484	10.191	10.237	10.317	10.569	10.612	10.728	10.967	11.057	11.1	11.189	11.272	11.322	11.352	11.684	11.694	11.717	11.727	12.042	12.168	12.261	12.314	12.397	12.42	12.483	12.526
C-065	5.209	5.511	6.642	6.791	7.136	7.176	7.203	7.362	7.392	7.435	7.528	7.74	7.81	8.019	8.268	8.603	9.13	9.233	9.343	9.399	9.406	9.445	9.462	9.482	10.189	10.235	10.318	10.57	10.617	10.729	10.968	11.068	11.098	11.197	11.27	11.323	11.353	11.688	11.695	11.715	11.728	12.043	12.169	12.269	12.315	12.398	12.418	12.484	12.524
C-071	5.238	5.573	6.681	6.81	7.162	7.205	7.225	7.391	7.414	7.461	7.55	7.756	7.829	8.028	8.274	8.609	9.136	9.232	9.345	9.398	9.402	9.445	9.468	9.484	10.191	10.238	10.317	10.566	10.613	10.729	10.968	11.057	11.097	11.19	11.269	11.323	11.349	11.684	11.701	11.717	11.731	12.046	12.165	12.265	12.315	12.397	12.417	12.484	12.524
C-077	5.207	5.509	6.653	6.789	7.144	7.188	7.211	7.377	7.4	7.443	7.536	7.752	7.821	8.02	8.272	8.608	9.138	9.231	9.344	9.394	9.4	9.44	9.467	9.48	10.187	10.237	10.319	10.565	10.615	10.731	10.966	11.059	11.099	11.192	11.268	11.321	11.355	11.686	11.7	11.713	11.729	12.038	12.171	12.264	12.317	12.4	12.416	12.486	12.522
C-088	5.203	5.522	6.663	6.799	7.151	7.194	7.217	7.383	7.406	7.449	7.542	7.755	7.818	8.027	8.275	8.607	9.135	9.231	9.344	9.397	9.403	9.44	9.467	9.483	10.19	10.233	10.322	10.568	10.614	10.727	10.966	11.056	11.099	11.192	11.275	11.324	11.354	11.679	11.699	11.713	11.733	12.041	12.17	12.267	12.313	12.399	12.419	12.486	12.525
C-100	5.209	5.527	6.665	6.811	7.15	7.193	7.213	7.382	7.402	7.448	7.538	7.75	7.816	8.019	8.271	8.599	9.134	9.23	9.343	9.396	9.402	9.439	9.462	9.482	10.189	10.235	10.321	10.573	10.613	10.729	10.968	11.058	11.098	11.187	11.273	11.323	11.356	11.685	11.701	11.705	11.728	12.04	12.169	12.265	12.315	12.398	12.421	12.484	12.524
C-105	5.205	5.51	6.652	6.794	7.146	7.189	7.212	7.375	7.401	7.445	7.534	7.753	7.82	8.022	8.277	8.609	9.133	9.233	9.342	9.395	9.402	9.442	9.465	9.482	10.188	10.238	10.321	10.563	10.613	10.729	10.965	11.058	11.097	11.19	11.273	11.323	11.353	11.691	11.698	11.711	11.728	12.043	12.169	12.265	12.315	12.398	12.418	12.484	12.524
C-122	5.204	5.513	6.641	6.78	7.135	7.181	7.205	7.364	7.394	7.437	7.526	7.745	7.815	8.021	8.273	8.608	9.135	9.232	9.341	9.398	9.404	9.441	9.464	9.484	10.191	10.237	10.317	10.575	10.615	10.731	10.964	11.056	11.1	11.189	11.272	11.322	11.352	11.683	11.697	11.713	11.73	12.038	12.168	12.264	12.314	12.397	12.42	12.483	12.523
C-123	5.198	5.513	6.661	6.793	7.148	7.192	7.215	7.377	7.401	7.447	7.537	7.749	7.815	8.024	8.273	8.605	9.129	9.232	9.345	9.395	9.401	9.444	9.464	9.481	10.191	10.234	10.32	10.569	10.616	10.732	10.967	11.057	11.1	11.189	11.269	11.322	11.349	11.687	11.697	11.717	11.727	12.039	12.168	12.264	12.317	12.397	12.417	12.483	12.523
C-130	5.204	5.515	6.633	6.779	7.125	7.178	7.198	7.36	7.39	7.433	7.526	7.748	7.815	8.017	8.266	8.604	9.135	9.231	9.341	9.394	9.4	9.437	9.467	9.483	10.19	10.233	10.323	10.575	10.615	10.731	10.966	11.059	11.099	11.189	11.272	11.325	11.351	11.686	11.7	11.713	11.729	12.038	12.167	12.267	12.317	12.396	12.416	12.486	12.522
C-138	5.203	5.512	6.63	6.786	7.131	7.177	7.201	7.363	7.39	7.433	7.522	7.741	7.808	8.017	8.269	8.604	9.135	9.231	9.341	9.397	9.404	9.443	9.463	9.486	10.19	10.236	10.319	10.571	10.615	10.727	10.966	11.056	11.099	11.195	11.275	11.321	11.348	11.673	11.696	11.716	11.729	12.038	12.171	12.263	12.313	12.399	12.416	12.486	12.526
C-140	5.208	5.526	6.671	6.82	7.155	7.198	7.218	7.388	7.407	7.454	7.543	7.756	7.822	8.025	8.28	8.608	9.133	9.229	9.345	9.395	9.401	9.441	9.464	9.481	10.191	10.237	10.32	10.569	10.612	10.728	10.967	11.057	11.097	11.193	11.273	11.322	11.352	11.681	11.697	11.714	11.727	12.042	12.168	12.265	12.314	12.397	12.417	12.484	12.523
C-143	5.202	5.51	6.652	6.801	7.143	7.189	7.212	7.375	7.402	7.445	7.534	7.747	7.823	8.022	8.274	8.609	9.137	9.23	9.342	9.396	9.402	9.439	9.465	9.485	10.188	10.232	10.318	10.567	10.613	10.726	10.965	11.058	11.098	11.194	11.27	11.323	11.35	11.685	11.698	11.711	11.728	12.043	12.166	12.262	12.315	12.395	12.421	12.484	12.521
C-144	5.205	5.513	6.638	6.787	7.132	7.179	7.202	7.361	7.391	7.434	7.524	7.746	7.809	8.018	8.27	8.605	9.133	9.229	9.345	9.398	9.402	9.445	9.465	9.484	10.188	10.238	10.317	10.569	10.612	10.729	10.967	11.057	11.097	11.193	11.276	11.322	11.352	11.691	11.697	11.714	11.727	12.042	12.168	12.268	12.314	12.397	12.417	12.484	12.523
C-146	5.199	5.531	6.669	6.805	7.156	7.196	7.219	7.385	7.408	7.455	7.544	7.753	7.82	8.025	8.278	8.609	9.134	9.23	9.346	9.396	9.402	9.445	9.465	9.482	10.189	10.238	10.321	10.573	10.613	10.726	10.962	11.058	11.098	11.194	11.273	11.323	11.35	11.688	11.698	11.711	11.728	12.04	12.166	12.262	12.315	12.398	12.418	12.484	12.524
C-147	5.204	5.509	6.637	6.783	7.135	7.178	7.201	7.367	7.39	7.433	7.526	7.742	7.812	8.017	8.27	8.605	9.135	9.232	9.341	9.394	9.404	9.444	9.461	9.484	10.19	10.237	10.32	10.569	10.615	10.731	10.967	11.056	11.096	11.189	11.272	11.322	11.352	11.687	11.7	11.717	11.73	12.038	12.171	12.264	12.314	12.397	12.417	12.483	12.523
C-148	5.201	5.522	6.66	6.8	7.151	7.195	7.218	7.38	7.407	7.45	7.54	7.755	7.822	8.027	8.273	8.608	9.132	9.232	9.344	9.398	9.404	9.444	9.467	9.484	10.19	10.237	10.32	10.565	10.612	10.728	10.967	11.056	11.099	11.192	11.272	11.322	11.352	11.683	11.697	11.713	11.73	12.042	12.168	12.264	12.314	12.397	12.417	12.483	12.523
C-155	5.205	5.514	6.629	6.778	7.13	7.176	7.199	7.362	7.392	7.435	7.524	7.743	7.81	8.019	8.271	8.606	9.134	9.23	9.343	9.396	9.402	9.442	9.462	9.482	10.192	10.235	10.318	10.57	10.613	10.729	10.965	11.058	11.098	11.197	11.273	11.323	11.35	11.682	11.695	11.708	11.728	12.04	12.169	12.265	12.312	12.398	12.418	12.484	12.521
C-157	5.205	5.514	6.632	6.781	7.129	7.176	7.196	7.362	7.388	7.431	7.524	7.737	7.81	8.019	8.267	8.606	9.133	9.23	9.342	9.395	9.402	9.439	9.462	9.485	10.188	10.235	10.318	10.573	10.613	10.726	10.965	11.061	11.097	11.19	11.27	11.323	11.353	11.678	11.695	11.711	11.728	12.04	12.169	12.265	12.315	12.398	12.418	12.484	12.521
C-159	5.235	5.57	6.681	6.814	7.159	7.202	7.225	7.391	7.415	7.461	7.547	7.756	7.823	8.028	8.281	8.609	9.136	9.233	9.346	9.399	9.402	9.438	9.465	9.482	10.188	10.235	10.321	10.566	10.613	10.726	10.965	11.057	11.097	11.193	11.273	11.323	11.349	11.681	11.694	11.711	11.728	12.039	12.169	12.265	12.312	12.398	12.414	12.484	12.521
C-162	5.224	5.552	6.671	6.807	7.155	7.198	7.221	7.384	7.41	7.454	7.543	7.752	7.822	8.024	8.276	8.605	9.132	9.229	9.341	9.394	9.404	9.441	9.464	9.481	10.187	10.234	10.32	10.572	10.612	10.728	10.964	11.053	11.096	11.196	11.276	11.322	11.352	11.684	11.697	11.71	11.727	12.039	12.168	12.264	12.314	12.397	12.417	12.483	12.523
C-165	5.204	5.516	6.66	6.813	7.145	7.191	7.214	7.38	7.404	7.447	7.54	7.752	7.818	8.024	8.279	8.608	9.135	9.232	9.344	9.397	9.404	9.441	9.464	9.484	10.187	10.237	10.316	10.562	10.615	10.728	10.967	11.056	11.099	11.192	11.269	11.322	11.352	11.71	11.7	11.717	11.727	12.042	12.171	12.267	12.314	12.397	12.417	12.486	12.523
C-170	5.209	5.511	6.639	6.785	7.137	7.18	7.203	7.366	7.392	7.432	7.525	7.744	7.807	8.019	8.271	8.603	9.131	9.23	9.34	9.396	9.403	9.446	9.462	9.486	10.189	10.239	10.318	10.567	10.614	10.73	10.965	11.068	11.098	11.194	11.274	11.324	11.353	11.689	11.698	11.708	11.728	12.037	12.17	12.266	12.316	12.402	12.418	12.488	12.528
C-183	5.24	5.575	6.68	6.812	7.157	7.204	7.227	7.39	7.416	7.459	7.549	7.758	7.824	8.03	8.279	8.611	9.138	9.228	9.344	9.394	9.404	9.44	9.467	9.483	10.19	10.233	10.319	10.568	10.615	10.727	10.966	11.056	11.099	11.192	11.275	11.321	11.348	11.683	11.696	11.709	11.729	12.041	12.167	12.267	12.313	12.396	12.419	12.482	12.522
C-184	5.238	5.577	6.681	6.831	7.159	7.206	7.225	7.391	7.415	7.461	7.551	7.76	7.823	8.028	8.274	8.609	9.136	9.229	9.342	9.399	9.405	9.438	9.465	9.482	10.188	10.235	10.318	10.57	10.613	10.729	10.965	11.057	11.097	11.197	11.273	11.323	11.349	11.681	11.701	11.711	11.728	12.043	12.169	12.265	12.312	12.398	12.418	12.484	12.524
C-192	5.239	5.575	6.683	6.832	7.16	7.207	7.227	7.393	7.416	7.459	7.549	7.758	7.827	8.03	8.275	8.61	9.138	9.234	9.343	9.397	9.403	9.443	9.516	9.483	10.189	10.236	10.319	10.568	10.614	10.727	10.962	11.055	11.099	11.195	11.268	11.324	11.351	11.679	11.699	11.712	11.729	12.037	12.167	12.266	12.313	12.399	12.419	12.485	12.522
C-193	5.205	5.513	6.648	6.787	7.139	7.186	7.205	7.371	7.395	7.441	7.531	7.746	7.809	8.022	8.274	8.609	9.136	9.233	9.345	9.395	9.402	9.438	9.461	9.485	10.188	10.235	10.321	10.566	10.613	10.732	10.968	11.057	11.097	11.193	11.273	11.319	11.349	11.684	11.698	11.711	11.727	12.039	12.165	12.262	12.315	12.398	12.418	12.484	12.524
C-196	5.203	5.518	6.666	6.812	7.151	7.194	7.217	7.386	7.406	7.449	7.539	7.755	7.818	8.023	8.276	8.604	9.128	9.231	9.344	9.4	9.4	9.44	9.463	9.48	10.19	10.226	10.316	10.565	10.611	10.731	10.966	11.056	11.099	11.202	11.271	11.321	11.348	11.689	11.693	11.713	11.726	12.038	12.167	12.263	12.313	12.396	12.419	12.482	12.519
C-197	5.204	5.523	6.664	6.804	7.152	7.195	7.215	7.381	7.404	7.451	7.54	7.749	7.819	8.028	8.28	8.608	9.136	9.232	9.345	9.398	9.405	9.438	9.464	9.484	10.191	10.234	10.32	10.569	10.612	10.728	10.964	11.057	11.097	11.193	11.273	11.322	11.352	11.691	11.694	11.714	11.727	12.042	12.172	12.268	12.314	12.401	12.417	12.484	12.527
C-200	5.233	5.572	6.68	6.812	7.157	7.204	7.227	7.39	7.416	7.459	7.546	7.755	7.821	8.027	8.279	8.607	9.128	9.231	9.344	9.397	9.403	9.44	9.467	9.483	10.19	10.233	10.319	10.561	10.611	10.727	10.963	11.056	11.099	11.192	11.271	11.321	11.354	11.686	11.699	11.709	11.729	12.041	12.167	12.267	12.313	12.396	12.416	12.482	12.522
C-202	5.204	5.513	6.631	6.78	7.132	7.178	7.202	7.364	7.391	7.434	7.527	7.749	7.809	8.021	8.273	8.608	9.132	9.235	9.341	9.398	9.405	9.441	9.464	9.484	10.191	10.237	10.32	10.566	10.612	10.728	10.964	11.057	11.097	11.186	11.272	11.325	11.352	11.684	11.697	11.71	11.727	12.039	12.168	12.264	12.314	12.397	12.42	12.483	12.523
C-204	5.204	5.516	6.664	6.806	7.155	7.195	7.218	7.384	7.407	7.45	7.54	7.752	7.822	8.024	8.276	8.608	9.136	9.232	9.341	9.398	9.404	9.444	9.467	9.484	10.187	10.234	10.317	10.569	10.612	10.728	10.967	11.053	11.096	11.189	11.272	11.322	11.352	11.684	11.697	11.71	11.727	12.035	12.165	12.264	12.314	12.397	12.42	12.483	12.52
C-205	NA	NA	NA	NA	NA	NA	NA	NA	NA	NA	NA	NA	NA	NA	NA	NA	NA	NA	NA	NA	NA	NA	NA	NA	NA	NA	NA	NA	NA	NA	NA	NA	NA	NA	NA	NA	NA	NA	NA	NA	NA	NA	NA	NA	NA	NA	NA	NA	NA
C-210	5.239	5.578	6.683	6.825	7.164	7.207	7.227	7.393	7.416	7.462	7.549	7.761	7.824	8.03	8.278	8.61	9.138	9.234	9.343	9.397	9.403	9.443	9.466	9.486	10.189	10.236	10.319	10.568	10.614	10.73	10.966	11.055	11.099	11.191	11.271	11.327	11.357	11.686	11.699	11.712	11.729	12.037	12.167	12.266	12.313	12.399	12.419	12.485	12.525
C-213	5.207	5.512	6.647	6.793	7.141	7.184	7.204	7.37	7.397	7.44	7.529	7.748	7.811	8.017	8.266	8.604	9.135	9.228	9.338	9.394	9.404	9.44	9.517	9.48	10.187	10.233	10.32	10.565	10.615	10.731	10.963	11.056	11.096	11.192	11.265	11.322	11.351	11.683	11.693	11.713	11.73	12.042	12.168	12.264	12.314	12.397	12.416	12.483	12.523
C-216	5.2	5.515	6.653	6.799	7.147	7.19	7.21	7.376	7.403	7.446	7.535	7.751	7.814	8.023	8.275	8.607	9.134	9.231	9.34	9.396	9.403	9.443	9.463	9.483	10.186	10.239	10.319	10.564	10.614	10.727	10.966	11.055	11.098	11.191	11.274	11.321	11.351	11.682	11.699	11.712	11.729	12.041	12.17	12.266	12.309	12.399	12.416	12.485	12.522
C-223	5.204	5.516	6.661	6.797	7.148	7.188	7.211	7.377	7.4	7.447	7.536	7.755	7.812	8.024	8.273	8.608	9.132	9.228	9.338	9.398	9.401	9.444	9.464	9.484	10.187	10.234	10.32	10.565	10.612	10.728	10.967	11.056	11.096	11.193	11.272	11.322	11.352	11.684	11.693	11.71	11.727	12.039	12.165	12.267	12.314	12.4	12.417	12.483	12.523
C-225	5.207	5.529	6.673	6.819	7.158	7.204	7.227	7.39	7.413	7.459	7.546	7.755	7.821	8.023	8.276	8.607	9.135	9.231	9.341	9.397	9.404	9.44	9.463	9.483	10.187	10.233	10.319	10.568	10.615	10.727	10.966	11.056	11.096	11.195	11.268	11.325	11.351	11.683	11.696	11.713	11.729	12.041	12.167	12.263	12.313	12.403	12.423	12.489	12.529
C-231	5.207	5.525	6.673	6.809	7.154	7.201	7.221	7.386	7.41	7.453	7.542	7.758	7.821	8.023	8.276	8.607	9.132	9.231	9.344	9.397	9.404	9.443	9.463	9.48	10.19	10.233	10.316	10.565	10.615	10.727	10.963	11.053	11.099	11.192	11.268	11.321	11.351	11.683	11.696	11.709	11.726	12.038	12.164	12.264	12.313	12.393	12.416	12.482	12.522
C-233	5.206	5.521	6.669	6.805	7.154	7.197	7.22	7.386	7.409	7.455	7.542	7.754	7.824	8.026	8.272	8.607	9.131	9.23	9.34	9.396	9.403	9.443	9.466	9.483	10.189	10.239	10.319	10.568	10.614	10.727	10.966	11.055	11.098	11.191	11.271	11.324	11.35	11.679	11.696	11.715	11.729	12.041	12.167	12.263	12.316	12.396	12.419	12.485	12.525
C-237	5.203	5.509	6.637	6.789	7.134	7.178	7.201	7.363	7.39	7.436	7.526	7.751	7.808	8.017	8.269	8.604	9.135	9.234	9.341	9.394	9.404	9.437	9.463	9.483	10.19	10.233	10.319	10.568	10.611	10.727	10.963	11.056	11.099	11.195	11.272	11.321	11.355	11.683	11.696	11.713	11.726	12.038	12.171	12.27	12.313	12.403	12.423	12.483	12.526
C-240	5.205	5.507	6.642	6.788	7.139	7.179	7.206	7.365	7.395	7.438	7.528	7.747	7.81	8.019	8.274	8.606	9.133	9.23	9.342	9.395	9.402	9.445	9.465	9.485	10.188	10.235	10.321	10.57	10.613	10.726	10.965	11.058	11.097	11.19	11.27	11.323	11.353	11.681	11.695	11.711	11.728	12.04	12.166	12.265	12.315	12.398	12.418	12.484	12.524
C-244	5.205	5.51	6.635	6.787	7.129	7.176	7.199	7.361	7.388	7.431	7.521	7.733	7.806	8.012	8.267	8.606	9.133	9.229	9.339	9.398	9.402	9.435	9.458	9.478	10.185	10.235	10.317	10.58	10.613	10.732	10.964	11.061	11.097	11.197	11.266	11.319	11.353	11.681	11.694	11.714	11.727	12.039	12.165	12.265	12.315	12.394	12.414	12.484	12.524
C-245	5.234	5.576	6.681	6.82	7.159	7.205	7.228	7.391	7.414	7.461	7.547	7.756	7.822	8.028	8.273	8.608	9.133	9.232	9.345	9.395	9.401	9.441	9.464	9.481	10.188	10.237	10.317	10.573	10.612	10.725	10.964	11.054	11.097	11.196	11.269	11.319	11.349	11.684	11.694	11.707	11.727	12.039	12.168	12.268	12.311	12.394	12.417	12.484	12.523
C-246	5.223	5.562	6.673	6.816	7.154	7.197	7.224	7.386	7.41	7.453	7.546	7.755	7.818	8.023	8.272	8.607	9.131	9.228	9.344	9.394	9.4	9.44	9.463	9.48	10.19	10.233	10.319	10.565	10.614	10.727	10.963	11.056	11.099	11.188	11.271	11.321	11.351	11.686	11.696	11.716	11.726	12.038	12.167	12.263	12.313	12.396	12.416	12.482	12.522
C-247	5.205	5.51	6.631	6.777	7.129	7.169	7.195	7.361	7.388	7.431	7.524	7.743	7.806	8.015	8.27	8.599	9.129	9.229	9.342	9.395	9.401	9.438	9.464	9.481	10.188	10.234	10.317	10.569	10.612	10.728	10.967	11.057	11.097	11.193	11.269	11.322	11.352	11.681	11.694	11.714	11.727	12.042	12.165	12.261	12.314	12.397	12.417	12.484	12.523
C-248	5.23	5.569	6.677	6.823	7.158	7.201	7.224	7.39	7.413	7.46	7.546	7.758	7.825	8.027	8.276	8.608	9.135	9.232	9.344	9.394	9.401	9.441	9.464	9.484	10.187	10.237	10.32	10.565	10.612	10.731	10.967	11.053	11.096	11.192	11.269	11.322	11.352	11.683	11.697	11.713	11.726	12.038	12.168	12.271	12.31	12.393	12.417	12.483	12.523
C-249	5.197	5.515	6.66	6.796	7.147	7.194	7.214	7.38	7.406	7.449	7.539	7.751	7.821	8.023	8.272	8.604	9.135	9.231	9.344	9.394	9.403	9.44	9.463	9.48	10.186	10.236	10.316	10.568	10.611	10.724	10.963	11.056	11.096	11.185	11.265	11.321	11.348	11.683	11.693	11.706	11.726	12.038	12.17	12.267	12.31	12.396	12.416	12.482	12.522
C-251	5.238	5.57	6.681	6.824	7.159	7.205	7.225	7.391	7.411	7.461	7.547	7.76	7.823	8.025	8.27	8.606	9.133	9.229	9.345	9.395	9.402	9.445	9.462	9.481	10.188	10.231	10.318	10.566	10.613	10.726	10.964	11.057	11.097	11.19	11.27	11.319	11.349	11.678	11.698	11.714	11.728	12.039	12.169	12.262	12.315	12.394	12.418	12.481	12.52
C-252	5.202	5.504	6.646	6.788	7.143	7.186	7.21	7.372	7.399	7.442	7.535	7.754	7.81	8.022	8.271	8.606	9.137	9.23	9.343	9.399	9.403	9.442	9.462	9.482	10.189	10.232	10.318	10.56	10.614	10.73	10.969	11.055	11.098	11.191	11.27	11.32	11.35	11.678	11.692	11.715	11.728	12.043	12.166	12.262	12.316	12.395	12.415	12.481	12.521
C-253	5.205	5.511	6.629	6.775	7.126	7.173	7.196	7.362	7.385	7.432	7.521	7.747	7.803	8.019	8.268	8.606	9.13	9.23	9.343	9.396	9.402	9.435	9.462	9.482	10.192	10.235	10.318	10.567	10.613	10.726	10.965	11.058	11.098	11.191	11.27	11.323	11.35	11.682	11.695	11.711	11.728	12.037	12.169	12.265	12.312	12.395	12.418	12.481	12.521
C-254	5.23	5.569	6.677	6.813	7.158	7.201	7.224	7.39	7.413	7.457	7.546	7.759	7.822	8.027	8.279	8.608	9.135	9.228	9.341	9.394	9.401	9.441	9.464	9.48	10.187	10.237	10.32	10.569	10.612	10.725	10.967	11.056	11.096	11.189	11.272	11.322	11.352	11.683	11.697	11.717	11.726	12.038	12.168	12.264	12.31	12.397	12.417	12.483	12.523
C-255	5.203	5.512	6.63	6.786	7.131	7.177	7.2	7.366	7.393	7.436	7.526	7.745	7.811	8.02	8.272	8.607	9.135	9.231	9.344	9.397	9.403	9.443	9.463	9.48	10.19	10.236	10.316	10.568	10.614	10.727	10.959	11.059	11.099	11.188	11.268	11.324	11.351	11.689	11.693	11.709	11.726	12.038	12.167	12.267	12.313	12.396	12.416	12.482	12.522
C-259	5.238	5.57	6.678	6.814	7.159	7.203	7.226	7.388	7.415	7.458	7.548	7.757	7.826	8.025	8.274	8.606	9.133	9.23	9.346	9.396	9.402	9.439	9.465	9.482	10.189	10.238	10.318	10.567	10.613	10.729	10.965	11.054	11.098	11.194	11.273	11.323	11.353	11.685	11.698	11.705	11.728	12.04	12.169	12.265	12.312	12.398	12.418	12.481	12.524
C-261	5.204	5.51	6.654	6.79	7.145	7.188	7.212	7.374	7.397	7.444	7.533	7.749	7.819	8.021	8.273	8.605	9.136	9.229	9.342	9.395	9.401	9.438	9.517	9.481	10.188	10.237	10.32	10.559	10.612	10.732	10.964	11.057	11.097	11.186	11.269	11.326	11.352	11.687	11.697	11.71	11.724	12.036	12.165	12.264	12.314	12.397	12.414	12.483	12.523
C-263	5.198	5.52	6.661	6.804	7.149	7.192	7.215	7.378	7.404	7.447	7.537	7.753	7.819	8.025	8.27	8.609	9.136	9.229	9.339	9.395	9.402	9.438	9.468	9.484	10.188	10.231	10.317	10.566	10.613	10.725	10.964	11.054	11.097	11.19	11.269	11.323	11.349	11.681	11.697	11.714	11.727	12.039	12.165	12.265	12.314	12.394	12.417	12.48	12.52
C-264	5.199	5.508	6.639	6.789	7.134	7.177	7.2	7.363	7.389	7.432	7.522	7.744	7.811	8.016	8.268	8.6	9.134	9.227	9.34	9.396	9.403	9.436	9.463	9.483	10.189	10.232	10.319	10.568	10.614	10.727	10.966	11.055	11.098	11.191	11.274	11.321	11.351	11.686	11.696	11.712	11.729	12.037	12.173	12.266	12.316	12.402	12.422	12.485	12.525
C-265	5.201	5.516	6.66	6.8	7.151	7.191	7.214	7.377	7.403	7.45	7.54	7.752	7.818	8.024	8.273	8.605	9.135	9.232	9.341	9.397	9.404	9.441	9.464	9.484	10.187	10.237	10.316	10.562	10.612	10.728	10.963	11.053	11.096	11.192	11.272	11.322	11.348	11.68	11.697	11.71	11.726	12.038	12.168	12.267	12.31	12.397	12.42	12.483	12.523
C-266	5.202	5.51	6.652	6.791	7.143	7.186	7.212	7.375	7.401	7.444	7.534	7.746	7.813	8.018	8.274	8.609	9.13	9.226	9.339	9.395	9.402	9.438	9.465	9.482	10.185	10.231	10.318	NA	10.61	10.732	10.965	11.054	11.097	11.187	11.267	11.32	11.346	11.688	11.694	11.711	11.724	12.036	12.162	12.262	12.312	12.398	12.414	12.481	12.524
C-268	5.204	5.512	6.657	6.803	7.145	7.191	7.214	7.377	7.403	7.443	7.536	7.749	7.818	8.024	8.273	8.601	9.129	9.228	9.344	9.394	9.401	9.437	9.46	9.48	10.187	10.233	10.316	10.565	10.612	10.731	10.963	11.053	11.096	11.189	11.272	11.322	11.348	11.683	11.693	11.71	11.726	12.038	12.164	12.264	12.314	12.397	12.417	12.483	12.523
C-269	5.203	5.512	6.636	6.799	7.131	7.181	7.204	7.366	7.393	7.436	7.529	7.745	7.814	8.023	8.272	8.607	9.135	9.228	9.344	9.397	9.403	9.437	9.46	9.483	10.19	10.233	10.319	10.565	10.611	10.73	10.966	11.059	11.099	11.192	11.271	11.321	11.351	11.683	11.696	11.713	11.726	12.038	12.167	12.263	12.313	12.396	12.416	12.482	12.522
C-271	5.23	5.568	6.68	6.809	7.157	7.204	7.224	7.39	7.416	7.459	7.546	7.755	7.824	8.027	8.275	8.607	9.131	9.228	9.344	9.394	9.403	9.44	9.463	9.48	10.186	10.236	10.316	10.565	10.611	10.727	10.966	11.056	11.099	11.192	11.271	11.321	11.348	11.689	11.696	11.713	11.726	12.038	12.167	12.263	12.313	12.396	12.416	12.482	12.519
C-273	5.198	5.519	6.661	6.8	7.152	7.191	7.215	7.377	7.404	7.447	7.54	7.752	7.819	8.024	8.273	8.608	9.132	9.229	9.341	9.394	9.401	9.441	9.464	9.481	10.187	10.234	10.317	10.562	10.612	10.731	10.967	11.057	11.096	11.193	11.272	11.322	11.352	11.68	11.697	11.714	11.727	12.039	12.168	12.264	12.311	12.397	12.417	12.483	12.523
C-274	5.206	5.511	6.629	6.788	7.127	7.173	7.196	7.362	7.389	7.432	7.522	7.747	7.804	8.013	8.268	8.603	9.131	9.23	9.34	9.393	9.403	9.442	9.459	9.479	10.186	10.232	10.318	10.567	10.61	10.73	10.962	11.058	11.095	11.191	11.271	11.32	11.35	11.682	11.692	11.715	11.728	12.034	12.163	12.266	12.312	12.395	12.415	12.482	12.518
C-276	5.203	5.508	6.633	6.789	7.13	7.173	7.2	7.363	7.386	7.432	7.525	7.741	7.807	8.016	8.272	8.603	9.134	9.23	9.34	9.393	9.403	9.439	9.463	9.479	10.189	10.236	10.322	10.571	10.611	10.727	10.962	11.058	11.098	11.191	11.271	11.321	11.354	11.679	11.699	11.715	11.729	12.037	12.17	12.266	12.313	12.395	12.419	12.482	12.522
C-278	5.201	5.523	6.664	6.804	7.152	7.195	7.218	7.384	7.408	7.454	7.54	7.759	7.819	8.025	8.27	8.609	9.133	9.232	9.342	9.398	9.405	9.441	9.465	9.481	10.191	10.231	10.317	10.563	10.612	10.725	10.964	11.054	11.097	11.19	11.269	11.322	11.352	11.681	11.697	11.711	11.727	12.039	12.168	12.265	12.311	12.397	12.417	12.484	12.523
C-279	5.228	5.567	6.675	6.818	7.156	7.203	7.222	7.388	7.412	7.458	7.544	7.76	7.826	8.025	8.274	8.606	9.13	9.23	9.339	9.396	9.402	9.439	9.465	9.485	10.188	10.235	10.318	10.567	10.61	10.726	10.961	11.054	11.097	11.19	11.273	11.32	11.35	11.685	11.691	11.711	11.725	12.04	12.166	12.265	12.312	12.395	12.418	12.481	12.521
C-280	5.203	5.509	6.637	6.793	7.134	7.174	7.201	7.363	7.39	7.436	7.526	7.745	7.805	8.017	8.272	8.604	9.135	9.228	9.341	9.397	9.4	9.437	9.467	9.48	10.187	10.23	10.319	10.565	10.611	10.724	10.963	11.056	11.096	11.195	11.272	11.321	11.351	11.683	11.7	11.713	11.726	12.038	12.167	12.26	12.31	12.396	12.416	12.483	12.522
C-282	5.201	5.519	6.664	6.8	7.148	7.191	7.211	7.377	7.4	7.447	7.536	7.749	7.815	8.018	8.266	8.598	9.129	9.229	9.341	9.391	9.401	9.438	9.514	9.477	10.187	10.234	10.317	10.566	10.612	10.728	10.967	11.057	11.096	11.189	11.272	11.322	11.349	11.684	11.697	11.707	11.727	12.039	12.165	12.264	12.311	12.397	12.417	12.483	12.523
C-283	5.195	5.52	6.668	6.811	7.152	7.199	7.219	7.384	7.404	7.451	7.54	7.759	7.822	8.021	8.27	8.605	9.13	9.229	9.339	9.392	9.402	9.441	9.461	9.481	10.188	10.231	10.321	10.563	10.613	10.729	10.964	11.054	11.094	11.19	11.266	11.319	11.352	11.681	11.694	11.704	11.727	12.036	12.165	12.265	12.311	12.394	12.414	12.48	12.52
C-285	5.227	5.568	6.68	6.813	7.161	7.201	7.224	7.39	7.413	7.456	7.546	7.761	7.821	8.027	8.272	8.607	9.135	9.231	9.344	9.394	9.404	9.443	9.463	9.483	10.187	10.236	10.319	10.568	10.611	10.724	10.966	11.056	11.096	11.192	11.275	11.325	11.348	11.683	11.693	11.709	11.726	12.038	12.164	12.264	12.313	12.393	12.413	12.483	12.522
C-287	5.203	5.508	6.649	6.792	7.144	7.187	7.21	7.373	7.399	7.442	7.532	7.751	7.817	8.023	8.268	8.607	9.131	9.231	9.343	9.396	9.403	9.44	9.463	9.483	10.189	10.229	10.315	10.564	10.611	10.727	10.966	11.055	11.095	11.191	11.271	11.317	11.354	11.689	11.696	11.712	11.725	12.037	12.167	12.266	12.309	12.396	12.416	12.482	12.522
C-289	5.201	5.513	6.661	6.8	7.148	7.191	7.215	7.377	7.407	7.45	7.54	7.752	7.819	8.024	8.273	8.608	9.136	9.232	9.341	9.394	9.401	9.444	9.464	9.484	10.187	10.234	10.317	10.566	10.612	10.725	10.964	11.053	11.096	11.189	11.269	11.319	11.349	11.68	11.694	11.714	11.727	12.039	12.165	12.258	12.311	12.394	12.417	12.48	12.52
C-291	5.202	5.507	6.642	6.788	7.136	7.179	7.206	7.368	7.395	7.438	7.527	7.746	7.816	8.018	8.274	8.606	9.133	9.226	9.342	9.395	9.402	9.442	9.462	9.482	10.188	10.231	10.314	10.563	10.613	10.729	10.961	11.054	11.094	11.197	11.267	11.32	11.349	11.681	11.695	11.711	11.728	12.036	12.166	12.262	12.312	12.395	12.418	12.484	12.521
C-292	5.202	5.51	6.652	6.811	7.146	7.189	7.212	7.375	7.401	7.448	7.534	7.753	7.816	8.022	8.267	8.606	9.133	9.229	9.339	9.395	9.399	9.442	9.462	9.482	10.185	10.231	10.318	10.563	10.61	10.726	10.961	11.054	11.097	11.194	11.27	11.323	11.349	11.681	11.694	11.708	11.724	12.036	12.169	12.265	12.312	12.398	12.418	12.484	12.524
C-293	5.2	5.509	6.627	6.786	7.128	7.174	7.197	7.36	7.39	7.433	7.522	7.741	7.804	8.017	8.262	8.601	9.131	9.228	9.34	9.397	9.4	9.443	9.46	9.48	10.186	10.233	10.316	10.561	10.611	10.727	10.963	11.056	11.096	11.195	11.271	11.321	11.351	11.689	11.696	11.706	11.726	12.038	12.167	12.263	12.313	12.396	12.416	12.482	12.522
C-294	5.204	5.509	6.65	6.796	7.145	7.188	7.211	7.373	7.4	7.443	7.533	7.748	7.818	8.02	8.269	8.604	9.132	9.231	9.341	9.397	9.401	9.44	9.46	9.48	10.187	10.23	10.32	10.568	10.612	10.724	10.963	11.056	11.096	11.189	11.268	11.322	11.348	11.683	11.693	11.71	11.726	12.038	12.168	12.264	12.31	12.397	12.42	12.483	12.523
C-295	5.228	5.569	6.678	6.814	7.159	7.202	7.225	7.388	7.414	7.457	7.547	7.756	7.822	8.028	8.277	8.608	9.133	9.232	9.342	9.395	9.401	9.438	9.464	9.481	10.188	10.231	10.317	10.566	10.609	10.728	10.961	11.054	11.097	11.19	11.273	11.319	11.352	11.677	11.694	11.711	11.727	12.039	12.165	12.265	12.311	12.397	12.417	12.484	12.52
C-296	5.207	5.509	6.63	6.776	7.125	7.175	7.194	7.36	7.39	7.437	7.523	7.742	7.808	8.017	8.269	8.604	9.132	9.228	9.341	9.394	9.401	9.441	9.464	9.484	10.187	10.233	10.316	10.565	10.612	10.728	10.963	11.056	11.096	11.189	11.269	11.322	11.352	11.687	11.697	11.71	11.726	12.038	12.168	12.267	12.317	12.41	12.423	12.496	12.536
C-297	5.208	5.513	6.638	6.8	7.136	7.182	7.202	7.368	7.394	7.441	7.527	7.743	7.809	8.018	8.267	8.602	9.129	9.226	9.338	9.395	9.402	9.441	9.465	9.481	10.188	10.234	10.314	10.569	10.616	10.729	10.964	11.057	11.097	11.193	11.273	11.319	11.352	11.684	11.697	11.711	11.724	12.039	12.172	12.265	12.295	12.444	12.417	12.51	12.527
C-301	5.194	5.513	6.661	6.8	7.149	7.192	7.215	7.377	7.401	7.447	7.537	7.749	7.815	8.021	8.273	8.605	9.133	9.225	9.338	9.395	9.401	9.441	9.464	9.481	10.188	10.231	10.317	10.559	10.612	10.725	10.964	11.054	11.097	11.19	11.269	11.319	11.349	11.681	11.694	11.71	11.727	12.039	12.168	12.264	12.311	12.397	12.417	12.483	12.52
C-302	5.23	5.565	6.676	6.822	7.154	7.2	7.224	7.386	7.409	7.456	7.546	7.758	7.821	8.023	8.275	8.607	9.135	9.228	9.34	9.393	9.4	9.433	9.463	9.483	10.186	10.23	10.316	10.565	10.611	10.727	10.963	11.052	11.095	11.195	11.268	11.318	11.348	11.683	11.696	11.713	11.726	12.038	12.167	12.263	12.31	12.393	12.419	12.482	12.522
C-303	5.202	5.51	6.638	6.781	7.133	7.179	7.202	7.365	7.388	7.435	7.524	7.746	7.806	8.015	8.264	8.602	9.13	9.229	9.339	9.392	9.402	9.435	9.462	9.482	10.185	10.235	10.318	10.57	10.613	10.726	10.965	11.057	11.097	11.19	11.27	11.32	11.349	11.675	11.691	11.711	11.728	12.036	12.166	12.262	12.312	12.395	12.414	12.481	12.517
C-305	5.199	5.508	6.632	6.778	7.123	7.173	7.196	7.362	7.389	7.432	7.521	7.744	7.807	8.016	8.271	8.6	9.131	9.23	9.34	9.393	9.399	9.442	9.459	9.479	10.186	10.232	10.318	10.564	10.61	10.726	10.962	11.058	11.095	11.191	11.27	11.32	11.35	11.682	11.695	11.705	11.725	12.037	12.166	12.262	12.312	12.395	12.412	12.481	12.521
C-306	5.226	5.568	6.673	6.809	7.157	7.2	7.224	7.39	7.409	7.456	7.546	7.755	7.821	8.023	8.269	8.604	9.131	9.228	9.34	9.393	9.397	9.437	9.46	9.476	10.186	10.23	10.316	10.561	10.608	10.724	10.963	11.052	11.092	11.185	11.268	11.318	11.351	11.683	11.693	11.709	11.726	12.034	12.164	12.263	12.313	12.396	12.416	12.479	12.519
C-307	5.197	5.512	6.656	6.796	7.144	7.191	7.211	7.376	7.4	7.446	7.536	7.755	7.814	8.023	8.272	8.604	9.135	9.228	9.344	9.394	9.4	9.44	9.463	9.483	10.187	10.23	10.316	10.565	10.611	10.727	10.963	11.052	11.096	11.192	11.268	11.321	11.351	11.683	11.693	11.713	11.729	12.038	12.167	12.267	12.313	12.396	12.413	12.482	12.522
C-308	5.203	5.508	6.649	6.788	7.143	7.187	7.21	7.372	7.399	7.442	7.532	7.751	7.817	8.019	8.272	8.603	9.134	9.23	9.343	9.396	9.4	9.439	9.463	9.482	10.186	10.232	10.319	10.564	10.611	10.73	10.965	11.052	11.095	11.188	11.274	11.32	11.347	11.682	11.695	11.705	11.725	12.037	12.167	12.263	12.312	12.395	12.415	12.482	12.522
C-329	5.209	5.511	6.633	6.789	7.124	7.173	7.197	7.359	7.386	7.432	7.522	7.741	7.807	8.013	8.268	8.6	9.128	9.227	9.34	9.39	9.4	9.436	9.456	9.479	10.183	10.229	10.315	10.561	10.607	10.72	10.966	11.055	11.092	11.188	11.264	11.317	11.347	11.682	11.692	11.705	11.722	12.037	12.163	12.256	12.313	12.389	12.412	12.478	12.515
C-331	5.215	5.51	6.641	6.784	7.136	7.179	7.205	7.368	7.394	7.438	7.527	7.74	7.813	8.018	8.27	8.599	9.126	9.226	9.339	9.392	9.395	9.432	9.458	9.481	10.185	10.224	10.311	10.56	10.606	10.719	10.958	11.051	11.094	11.187	11.263	11.316	11.343	11.678	11.694	11.704	11.721	12.033	12.162	12.258	12.308	12.391	12.411	12.477	12.517
C-333	5.21	5.512	6.65	6.796	7.141	7.184	7.207	7.37	7.397	7.44	7.529	7.748	7.811	8.02	8.269	8.601	9.132	9.225	9.341	9.39	9.397	9.434	9.457	9.48	10.183	10.227	10.316	10.558	10.608	10.721	10.96	11.053	11.092	11.185	11.265	11.318	11.345	11.68	11.693	11.706	11.723	12.035	12.177	12.264	12.313	12.4	12.416	12.483	12.522
C-335	5.212	5.514	6.636	6.782	7.13	7.173	7.2	7.362	7.389	7.432	7.521	7.744	7.807	8.016	8.265	8.606	9.127	9.22	9.339	9.389	9.399	9.436	9.462	9.476	10.185	10.229	10.312	10.557	10.607	10.726	10.959	11.055	11.091	11.181	11.267	11.317	11.34	11.678	11.692	11.712	11.722	12.037	12.16	12.256	12.309	12.388	12.408	12.475	12.515
C-336	5.217	5.512	6.627	6.776	7.125	7.174	7.194	7.357	7.387	7.43	7.519	7.745	7.811	8.014	8.269	8.601	9.132	9.225	9.338	9.391	9.397	9.434	9.46	9.477	10.184	10.223	10.313	10.565	10.608	10.724	10.96	11.053	11.093	11.186	11.272	11.315	11.345	11.677	11.69	11.71	11.723	12.035	12.164	12.257	12.307	12.39	12.41	12.479	12.516
C-337	5.209	5.515	6.639	6.779	7.13	7.177	7.2	7.362	7.389	7.432	7.522	7.744	7.814	8.019	8.268	8.603	9.127	9.227	9.34	9.393	9.4	9.436	9.459	9.476	10.186	10.232	10.315	10.564	10.607	10.723	10.959	11.052	11.092	11.188	11.271	11.317	11.347	11.682	11.695	11.705	11.722	12.037	12.16	12.259	12.309	12.389	12.409	12.478	12.515
C-338	5.213	5.512	6.64	6.789	7.138	7.181	7.204	7.363	7.39	7.436	7.526	7.745	7.811	8.017	8.266	8.601	9.132	9.225	9.341	9.387	9.397	9.434	9.46	9.477	10.183	10.23	10.316	10.565	10.608	10.721	10.96	11.053	11.092	11.185	11.262	11.318	11.345	11.68	11.69	11.703	11.723	12.035	12.164	12.257	12.31	12.39	12.413	12.479	12.519
C-339	5.209	5.521	6.659	6.795	7.147	7.187	7.21	7.376	7.399	7.445	7.535	7.744	7.814	8.019	8.265	8.6	9.131	9.227	9.34	9.393	9.399	9.436	9.459	9.476	10.186	10.226	10.315	10.557	10.607	10.723	10.959	11.052	11.091	11.184	11.264	11.32	11.35	11.685	11.692	11.709	11.722	12.03	12.166	12.263	12.306	12.392	12.412	12.478	12.518
C-341	5.216	5.512	6.63	6.786	7.127	7.174	7.197	7.363	7.386	7.429	7.519	7.741	7.804	8.013	8.269	8.604	9.128	9.224	9.34	9.383	9.397	9.433	9.456	9.48	10.183	10.226	10.312	10.561	10.608	10.724	10.963	11.055	11.092	11.185	11.264	11.318	11.344	11.679	11.689	11.696	11.722	12.034	12.16	12.26	12.31	12.393	12.412	12.475	12.519
C-343	5.199	5.534	6.666	6.795	7.147	7.19	7.213	7.379	7.402	7.445	7.538	7.75	7.814	8.019	8.268	8.6	9.127	9.227	9.34	9.389	9.396	9.433	9.459	9.476	10.182	10.229	10.315	10.564	10.607	10.726	10.955	11.052	11.091	11.188	11.267	11.317	11.344	11.675	11.689	11.705	11.722	12.034	12.163	12.259	12.309	12.392	12.412	12.478	12.515
C-346	5.209	5.511	6.636	6.775	7.13	7.176	7.2	7.362	7.389	7.432	7.521	7.744	7.807	8.016	8.265	8.596	9.124	9.223	9.34	9.389	9.396	9.436	9.456	9.476	10.182	10.225	10.312	10.567	10.607	10.723	10.959	11.051	11.091	11.181	11.27	11.317	11.343	11.675	11.692	11.702	11.722	12.033	12.163	12.259	12.306	12.392	12.412	12.478	12.518
C-347	5.211	5.513	6.631	6.777	7.129	7.172	7.198	7.364	7.387	7.431	7.523	7.739	7.805	8.014	8.27	8.602	9.129	9.225	9.335	9.388	9.395	9.438	9.458	9.478	10.184	10.227	10.31	10.559	10.609	10.722	10.957	11.05	11.09	11.186	11.263	11.316	11.345	11.677	11.694	11.707	11.72	12.032	12.158	12.255	12.308	12.391	12.407	12.477	12.517
C-348	5.217	5.512	6.634	6.783	7.131	7.174	7.201	7.36	7.387	7.433	7.526	7.745	7.811	8.014	8.266	8.604	9.129	9.221	9.338	9.387	9.397	9.437	9.46	9.477	10.184	10.233	10.316	10.559	10.608	10.724	10.957	11.053	11.093	11.186	11.265	11.315	11.345	11.68	11.69	11.71	11.723	12.035	12.161	12.257	12.31	12.387	12.41	12.476	12.516
C-351	5.21	5.509	6.643	6.779	7.131	7.177	7.201	7.363	7.39	7.43	7.522	7.738	7.801	8.01	8.262	8.594	9.132	9.221	9.337	9.39	9.397	9.433	9.463	9.473	10.18	10.226	10.313	10.558	10.605	10.721	10.956	11.053	11.089	11.185	11.265	11.318	11.344	11.683	11.686	11.703	11.723	12.038	12.161	12.26	12.31	12.393	12.409	12.476	12.516
C-357	5.213	5.511	6.653	6.789	7.144	7.183	7.207	7.373	7.399	7.439	7.528	7.751	7.814	8.016	8.265	8.603	9.128	9.224	9.337	9.39	9.396	9.436	9.459	9.476	10.183	10.232	10.312	10.558	10.607	10.72	10.959	11.052	11.092	11.185	11.264	11.314	11.344	11.679	11.689	11.706	11.722	12.031	12.16	12.256	12.309	12.389	12.412	12.475	12.518
C-358	5.214	5.513	6.624	6.77	7.119	7.162	7.189	7.351	7.381	7.421	7.514	7.739	7.802	8.011	8.267	8.599	9.129	9.226	9.335	9.388	9.395	9.431	9.461	9.474	10.184	10.228	10.314	10.563	10.609	10.725	10.961	11.054	11.09	11.183	11.263	11.316	11.346	11.674	11.691	11.701	11.724	12.032	12.162	12.258	12.308	12.391	12.414	12.477	12.517
C-359	5.215	5.511	6.632	6.778	7.13	7.176	7.199	7.365	7.385	7.432	7.524	7.74	7.806	8.015	8.261	8.599	9.124	9.22	9.339	9.392	9.396	9.435	9.455	9.475	10.182	10.228	10.315	10.557	10.607	10.723	10.958	11.051	11.091	11.184	11.264	11.317	11.343	11.672	11.692	11.705	11.721	12.03	12.159	12.256	12.309	12.388	12.408	12.478	12.518
C-361	5.215	5.51	6.631	6.774	7.126	7.169	7.195	7.358	7.381	7.428	7.517	7.729	7.799	8.011	8.264	8.599	9.13	9.222	9.335	9.392	9.395	9.435	9.458	9.478	10.185	10.231	10.314	10.559	10.609	10.725	10.958	11.054	11.09	11.183	11.266	11.319	11.346	11.681	11.694	11.707	11.724	12.033	12.165	12.261	12.308	12.391	12.411	12.477	12.517
C-362	5.232	5.584	6.686	6.812	7.153	7.203	7.226	7.389	7.415	7.455	7.548	7.757	7.824	8.023	8.271	8.607	9.131	9.224	9.343	9.39	9.396	9.439	9.456	9.476	10.182	10.232	10.312	10.557	10.607	10.723	10.952	11.048	11.092	11.184	11.261	11.317	11.344	11.672	11.695	11.709	11.722	12.03	12.16	12.259	12.312	12.392	12.412	12.478	12.515
C-363	5.207	5.549	6.671	6.807	7.152	7.198	7.218	7.384	7.407	7.454	7.543	7.752	7.822	8.021	8.27	8.605	9.129	9.225	9.338	9.391	9.398	9.437	9.457	9.477	10.184	10.227	10.313	10.566	10.609	10.721	10.96	11.05	11.093	11.186	11.266	11.315	11.345	11.674	11.694	11.71	11.72	12.032	12.165	12.261	12.307	12.394	12.41	12.477	12.516
C-364	5.254	5.589	6.683	6.813	7.158	7.204	7.228	7.393	7.413	7.457	7.546	7.755	7.818	8.024	8.273	8.608	9.129	9.225	9.341	9.391	9.397	9.441	9.46	9.477	10.184	10.227	10.313	10.559	10.608	10.724	10.96	11.05	11.093	11.186	11.262	11.315	11.345	11.673	11.687	11.707	11.72	12.035	12.161	12.257	12.307	12.39	12.413	12.476	12.516
C-366	5.235	5.57	6.681	6.817	7.152	7.195	7.222	7.388	7.411	7.454	7.54	7.753	7.816	8.018	8.274	8.602	9.13	9.222	9.339	9.388	9.395	9.435	9.458	9.478	10.185	10.221	10.314	10.566	10.606	10.722	10.958	11.047	11.09	11.183	11.263	11.316	11.346	11.668	11.691	11.704	11.721	12.036	12.159	12.251	12.308	12.391	12.411	12.477	12.514
C-367	5.213	5.509	6.643	6.776	7.138	7.178	7.201	7.363	7.393	7.433	7.526	7.735	7.808	8.017	8.266	8.601	9.132	9.225	9.341	9.39	9.397	9.434	9.46	9.477	10.183	10.223	10.313	10.558	10.608	10.724	10.963	11.049	11.092	11.182	11.265	11.318	11.345	11.676	11.69	11.703	11.723	12.035	12.161	12.257	12.307	12.39	12.41	12.476	12.516
C-368	5.204	5.512	6.653	6.79	7.145	7.184	7.211	7.373	7.4	7.443	7.533	7.745	7.815	8.02	8.269	8.604	9.125	9.228	9.341	9.391	9.397	9.437	9.46	9.477	10.184	10.23	10.313	10.558	10.608	10.721	10.963	11.049	11.093	11.182	11.265	11.318	11.341	11.67	11.693	11.703	11.723	12.032	12.158	12.257	12.31	12.39	12.41	12.479	12.516
C-369	5.214	5.513	6.624	6.767	7.122	7.168	7.188	7.354	7.381	7.424	7.513	7.732	7.805	8.011	8.263	8.598	9.126	9.222	9.338	9.388	9.398	9.434	9.458	9.474	10.184	10.227	10.31	10.559	10.609	10.725	10.957	11.053	11.09	11.19	11.263	11.319	11.349	11.681	11.684	11.707	11.72	12.032	12.162	12.258	12.311	12.391	12.41	12.477	12.517
C-370	5.216	5.511	6.622	6.772	7.123	7.167	7.19	7.356	7.379	7.425	7.515	7.737	7.8	8.013	8.261	8.597	9.127	9.224	9.336	9.389	9.396	9.429	9.456	9.476	10.182	10.229	10.312	10.557	10.607	10.723	10.962	11.055	11.091	11.188	11.264	11.317	11.347	11.679	11.692	11.705	11.722	12.03	12.163	12.256	12.309	12.392	12.412	12.478	12.515
C-371	5.214	5.513	6.624	6.777	7.125	7.172	7.195	7.358	7.384	7.427	7.52	7.736	7.806	8.015	8.267	8.599	9.129	9.226	9.335	9.391	9.398	9.431	9.458	9.478	10.184	10.228	10.314	10.559	10.606	10.725	10.961	11.05	11.09	11.183	11.266	11.316	11.346	11.674	11.687	11.711	11.72	12.032	12.162	12.258	12.308	12.391	12.411	12.477	12.517
C-374	5.208	5.506	6.638	6.797	7.142	7.178	7.202	7.364	7.391	7.434	7.527	7.742	7.812	8.018	8.267	8.602	9.132	9.225	9.338	9.391	9.398	9.438	9.458	9.477	10.184	10.231	10.31	10.559	10.605	10.722	10.96	11.053	11.093	11.186	11.266	11.319	11.342	11.674	11.694	11.71	11.72	12.035	12.165	12.261	12.304	12.39	12.414	12.477	12.513
C-378	5.21	5.509	6.643	6.783	7.134	7.174	7.201	7.363	7.39	7.433	7.526	7.741	7.808	8.017	8.266	8.597	9.125	9.224	9.337	9.39	9.397	9.433	9.457	9.477	10.183	10.226	10.316	10.558	10.605	10.717	10.96	11.049	11.092	11.182	11.262	11.318	11.344	11.676	11.686	11.709	11.723	12.031	12.164	12.26	12.307	12.39	12.409	12.476	12.516
C-379	5.24	5.522	6.687	6.83	7.158	7.208	7.228	7.394	7.413	7.46	7.549	7.755	7.825	8.024	8.273	8.605	9.129	9.222	9.341	9.391	9.397	9.434	9.46	9.48	10.184	10.234	10.313	10.562	10.608	10.721	10.96	11.05	11.093	11.186	11.265	11.318	11.345	11.68	11.69	11.707	11.723	12.032	12.161	12.254	12.307	12.39	12.407	12.476	12.516
C-406	5.251	5.586	6.681	6.813	7.155	7.205	7.225	7.391	7.414	7.46	7.547	7.749	7.822	8.024	8.273	8.602	9.122	9.225	9.341	9.391	9.398	9.431	9.461	9.477	10.184	10.231	10.314	10.562	10.605	10.722	10.96	11.05	11.093	11.183	11.266	11.319	11.345	11.677	11.694	11.707	11.72	12.032	12.162	12.258	12.307	12.39	12.407	12.477	12.516
C-410	5.211	5.513	6.621	6.774	7.119	7.169	7.192	7.354	7.381	7.427	7.52	7.743	7.799	8.015	8.263	8.602	9.129	9.222	9.335	9.388	9.398	9.435	9.454	9.474	10.184	10.228	10.314	10.559	10.606	10.722	10.961	11.044	11.093	11.183	11.263	11.316	11.346	11.681	11.691	11.707	11.72	12.032	12.162	12.258	12.308	12.391	12.411	12.474	12.513
C-415	5.213	5.512	6.633	6.776	7.127	7.174	7.197	7.36	7.383	7.426	7.519	7.735	7.804	8.01	8.262	8.597	9.125	9.224	9.334	9.387	9.397	9.433	9.456	9.476	10.183	10.229	10.312	10.561	10.608	10.721	10.963	11.052	11.089	11.185	11.265	11.314	11.344	11.683	11.693	11.703	11.722	12.028	12.16	12.257	12.306	12.389	12.406	12.476	12.515
S-259	5.204	5.509	6.627	6.773	7.125	7.171	7.194	7.353	7.38	7.426	7.519	7.732	7.801	8.014	8.259	8.594	9.128	9.221	9.337	9.391	9.397	9.43	9.454	9.473	10.183	10.227	10.313	10.562	10.605	10.724	10.96	11.053	11.093	11.185	11.268	11.318	11.348	11.676	11.69	11.703	11.72	12.035	12.158	12.257	12.307	12.39	12.41	12.476	12.519
S-266	5.212	5.511	6.629	6.781	7.126	7.169	7.196	7.359	7.385	7.428	7.521	7.737	7.806	8.012	8.268	8.599	9.127	9.223	9.339	9.389	9.396	9.435	9.459	9.475	10.185	10.228	10.311	10.56	10.607	10.723	10.962	11.051	11.091	11.187	11.264	11.317	11.343	11.678	11.695	11.701	11.721	12.03	12.163	12.259	12.305	12.388	12.411	12.478	12.518
S-274	5.212	5.508	6.622	6.782	7.127	7.17	7.193	7.359	7.385	7.428	7.521	7.74	7.807	8.016	8.261	8.6	9.127	9.223	9.336	9.386	9.396	9.429	9.459	9.476	10.182	10.232	10.308	10.56	10.607	10.72	10.959	11.058	11.091	11.187	11.264	11.314	11.34	11.678	11.688	11.705	11.722	12.033	12.163	12.252	12.309	12.388	12.408	12.475	12.515
S-280	5.214	5.509	6.621	6.774	7.125	7.168	7.195	7.357	7.384	7.427	7.517	7.739	7.805	8.014	8.263	8.602	9.129	9.225	9.335	9.388	9.398	9.438	9.461	9.477	10.184	10.227	10.314	10.566	10.609	10.725	10.96	11.05	11.093	11.186	11.266	11.319	11.345	11.677	11.69	11.704	11.72	12.032	12.165	12.258	12.314	12.41	12.417	12.5	12.53
S-283	5.252	5.587	6.685	6.811	7.159	7.206	7.226	7.392	7.411	7.458	7.547	7.756	7.823	8.025	8.274	8.602	9.13	9.223	9.339	9.389	9.395	9.439	9.462	9.475	10.182	10.231	10.311	10.553	10.606	10.723	10.958	11.048	11.091	11.184	11.26	11.313	11.346	11.675	11.695	11.708	11.724	12.03	12.162	12.259	12.305	12.391	12.408	12.474	12.514
S-296	5.207	5.505	6.64	6.776	7.134	7.177	7.201	7.363	7.39	7.436	7.526	7.738	7.808	8.017	8.266	8.597	9.131	9.224	9.337	9.39	9.397	9.44	9.46	9.477	10.183	10.23	10.309	10.558	10.608	10.717	10.956	11.052	11.092	11.182	11.261	11.318	11.344	11.676	11.689	11.706	11.719	12.034	12.164	12.257	12.307	12.389	12.409	12.479	12.516
S-301	5.212	5.504	6.639	6.785	7.136	7.176	7.203	7.365	7.392	7.435	7.528	7.74	7.81	8.015	8.264	8.603	9.127	9.223	9.336	9.389	9.399	9.435	9.455	9.479	10.185	10.228	10.311	10.563	10.607	10.726	10.958	11.048	11.091	11.184	11.267	11.317	11.343	11.678	11.691	11.705	11.721	12.033	12.163	12.255	12.309	12.391	12.411	12.478	12.514
S-305	5.211	5.507	6.625	6.781	7.126	7.172	7.195	7.361	7.388	7.431	7.521	7.74	7.809	8.012	8.267	8.596	9.13	9.226	9.335	9.388	9.395	9.435	9.458	9.475	10.181	10.228	10.314	10.556	10.606	10.726	10.958	11.054	11.09	11.183	11.263	11.316	11.346	11.674	11.691	11.704	11.721	12.033	12.159	12.262	12.308	12.391	12.408	12.477	12.514
S-306	5.211	5.509	6.644	6.79	7.135	7.181	7.205	7.371	7.394	7.437	7.526	7.742	7.812	8.017	8.266	8.605	9.129	9.222	9.338	9.388	9.394	9.437	9.461	9.474	10.181	10.234	10.313	10.559	10.605	10.718	10.954	11.053	11.09	11.176	11.266	11.315	11.342	11.684	11.69	11.707	11.72	12.032	12.161	12.258	12.307	12.39	12.41	12.476	12.516
S-307	5.209	5.511	6.622	6.768	7.117	7.166	7.19	7.352	7.379	7.422	7.518	7.744	7.807	8.009	8.268	8.6	9.131	9.223	9.336	9.386	9.396	9.439	9.459	9.479	10.182	10.232	10.312	10.574	10.607	10.723	10.959	11.055	11.091	11.188	11.264	11.317	11.34	11.675	11.695	11.705	11.722	12.034	12.16	12.256	12.309	12.389	12.408	12.475	12.515
S-310	5.229	5.58	6.685	6.818	7.156	7.203	7.226	7.388	7.415	7.458	7.544	7.757	7.82	8.025	8.268	8.603	9.13	9.223	9.339	9.392	9.396	9.442	9.459	9.475	10.182	10.232	10.311	10.567	10.607	10.719	10.958	11.048	11.091	11.184	11.267	11.313	11.343	11.675	11.688	11.708	11.721	12.03	12.163	12.259	12.309	12.392	12.411	12.475	12.514
S-312	5.216	5.511	6.623	6.772	7.124	7.17	7.197	7.356	7.386	7.426	7.519	7.791	7.807	8.013	8.268	8.6	9.131	9.22	9.337	9.39	9.396	9.433	9.456	9.476	10.183	10.229	10.312	10.558	10.607	10.72	10.959	11.052	11.092	11.181	11.268	11.317	11.344	11.672	11.689	11.705	11.719	12.031	12.163	12.256	12.309	12.389	12.409	12.475	12.515
S-317	5.206	5.504	6.622	6.775	7.12	7.166	7.193	7.352	7.382	7.425	7.515	7.73	7.803	8.012	8.261	8.596	9.13	9.223	9.336	9.386	9.396	9.432	9.456	9.475	10.182	10.229	10.312	10.56	10.607	10.726	10.959	11.055	11.091	11.184	11.264	11.317	11.34	11.675	11.692	11.705	11.722	12.03	12.16	12.259	12.305	12.388	12.412	12.475	12.515
S-320	5.235	5.587	6.685	6.814	7.159	7.202	7.226	7.392	7.412	7.461	7.548	7.757	7.826	8.022	8.271	8.606	9.13	9.223	9.339	9.389	9.399	9.439	9.459	9.478	10.182	10.228	10.315	10.56	10.606	10.723	10.958	11.048	11.091	11.184	11.263	11.316	11.343	11.678	11.691	11.731	11.725	12.03	12.162	12.259	12.308	12.391	12.411	12.478	12.514
S-326	5.235	5.583	6.682	6.811	7.156	7.202	7.226	7.392	7.411	7.458	7.544	7.76	7.82	8.022	8.277	8.606	9.123	9.223	9.339	9.392	9.395	9.435	9.459	9.475	10.182	10.232	10.311	10.557	10.606	10.723	10.958	11.048	11.091	11.18	11.26	11.316	11.343	11.678	11.685	NA	11.718	12.033	12.159	12.252	12.305	12.388	12.408	12.478	12.514
S-329	5.21	5.509	6.633	6.776	7.128	7.174	7.197	7.363	7.387	7.43	7.523	7.745	7.808	8.014	8.262	8.601	9.128	9.225	9.337	9.39	9.397	9.437	9.457	9.477	10.183	10.227	10.313	10.565	10.605	10.721	10.96	11.056	11.089	11.185	11.265	11.318	11.341	11.683	11.693	11.706	11.723	12.031	12.164	12.257	12.307	12.39	12.41	12.476	12.519
S-331	5.207	5.505	6.64	6.789	7.134	7.178	7.201	7.367	7.39	7.436	7.526	7.748	7.808	8.014	8.266	8.601	9.132	9.225	9.337	9.387	9.394	9.434	9.457	9.477	10.18	10.227	10.309	10.558	10.608	10.721	10.96	11.049	11.092	11.185	11.265	11.315	11.345	11.676	11.686	11.706	11.72	12.035	12.161	12.257	12.307	12.39	12.41	12.476	12.516
S-333	5.244	5.589	6.684	6.817	7.159	7.205	7.225	7.391	7.411	7.457	7.55	7.756	7.822	8.024	8.277	8.605	9.129	9.225	9.338	9.391	9.398	9.435	9.458	9.478	10.184	10.231	10.31	10.559	10.606	10.722	10.957	11.05	11.093	11.19	11.263	11.316	11.346	11.681	11.691	11.704	11.724	12.032	12.165	12.258	12.308	12.391	12.411	12.477	12.517
S-335	5.208	5.51	6.628	6.777	7.125	7.172	7.195	7.361	7.388	7.431	7.524	7.743	7.806	8.011	8.26	8.602	9.126	9.222	9.335	9.388	9.395	9.435	9.458	9.474	10.181	10.227	10.31	10.563	10.606	10.722	10.957	11.054	11.09	11.193	11.263	11.316	11.346	11.677	11.694	11.704	11.72	12.029	12.158	12.261	12.308	12.391	12.411	12.477	12.513
S-336	5.239	5.58	6.682	6.811	7.156	7.203	7.223	7.388	7.408	7.458	7.544	7.757	7.823	8.022	8.274	8.599	9.127	9.22	9.336	9.389	9.396	9.432	9.459	9.475	10.182	10.225	10.311	10.557	10.603	10.723	10.958	11.048	11.091	11.187	11.26	11.317	11.34	11.672	11.685	11.705	11.718	12.03	12.159	12.249	12.309	12.388	12.408	12.475	12.514
S-337	5.209	5.508	6.636	6.782	7.13	7.174	7.2	7.363	7.389	7.432	7.525	7.747	7.811	8.016	8.265	8.6	9.131	9.221	9.337	9.39	9.396	9.433	9.459	9.476	10.183	10.229	10.309	10.558	10.607	10.723	10.959	11.049	11.092	11.185	11.261	11.314	11.344	11.676	11.689	11.702	11.719	12.031	12.163	12.256	12.306	12.389	12.409	12.475	12.515
S-339	5.208	5.523	6.661	6.824	7.145	7.192	7.215	7.378	7.401	7.447	7.537	7.746	7.812	8.018	8.27	8.605	9.136	9.229	9.335	9.395	9.398	9.441	9.458	9.478	10.188	10.231	10.32	10.569	10.619	10.725	10.961	11.05	11.093	11.186	11.263	11.319	11.349	11.681	11.691	11.707	11.72	12.032	12.162	12.261	12.308	12.394	12.417	12.48	12.517
S-346	5.208	5.507	6.648	6.797	7.139	7.182	7.205	7.368	7.395	7.441	7.531	7.746	7.813	8.018	8.267	8.602	9.13	9.223	9.332	9.389	9.395	9.435	9.458	9.478	10.181	10.228	10.311	10.56	10.606	10.722	10.958	11.047	11.091	11.183	11.263	11.313	11.346	11.681	11.691	11.704	11.721	12.036	12.162	12.258	12.305	12.391	12.411	12.477	12.517
S-351	5.212	5.51	6.632	6.771	7.126	7.169	7.193	7.355	7.382	7.425	7.518	7.743	7.8	8.012	8.264	8.603	9.13	9.223	9.336	9.389	9.395	9.435	9.462	9.475	10.182	10.228	10.311	10.56	10.606	10.719	10.958	11.051	11.091	11.184	11.267	11.316	11.346	11.675	11.688	11.705	11.718	12.033	12.159	12.255	12.308	12.391	12.411	12.478	12.514
S-357	5.204	5.505	6.62	6.766	7.118	7.164	7.184	7.353	7.373	7.416	7.509	7.738	7.795	8.007	8.259	8.598	9.125	9.221	9.334	9.384	9.394	9.434	9.457	9.473	10.18	10.23	10.313	10.558	10.605	10.724	10.96	11.049	11.089	11.195	11.262	11.315	11.345	11.676	11.693	11.706	11.723	12.035	12.161	12.26	12.307	12.39	12.41	12.476	12.516
S-362	5.205	5.507	6.625	6.778	7.126	7.169	7.196	7.358	7.388	7.428	7.521	7.74	7.809	8.012	8.267	8.599	9.133	9.223	9.336	9.392	9.399	9.435	9.458	9.475	10.185	10.231	10.308	10.566	10.61	10.726	10.958	11.057	11.091	11.183	11.263	11.316	11.346	11.668	11.691	11.708	11.721	12.036	12.159	12.258	12.308	12.388	12.411	12.474	12.514
S-363	5.206	5.505	6.643	6.786	7.137	7.177	7.204	7.366	7.393	7.436	7.525	7.741	7.807	8.013	8.265	8.6	9.128	9.224	9.334	9.393	9.393	9.433	9.46	9.476	10.18	10.226	10.312	10.561	10.604	10.72	10.959	11.049	11.092	11.185	11.265	11.314	11.344	11.676	11.692	11.699	11.719	12.034	12.16	12.26	12.306	12.389	12.409	12.475	12.515
S-364	5.205	5.507	6.628	6.774	7.129	7.172	7.199	7.362	7.385	7.428	7.521	7.74	7.803	8.012	8.264	8.599	9.13	9.223	9.336	9.389	9.395	9.432	9.455	9.478	10.182	10.228	10.311	10.563	10.606	10.722	10.958	11.051	11.091	11.187	11.263	11.316	11.346	11.681	11.691	11.704	11.721	12.033	12.159	12.255	12.308	12.388	12.411	12.477	12.514
S-368	5.208	5.507	6.632	6.774	7.129	7.172	7.196	7.358	7.385	7.428	7.521	7.736	7.803	8.012	8.264	8.599	9.127	9.223	9.336	9.385	9.395	9.432	9.458	9.475	10.182	10.225	10.311	10.563	10.606	10.722	10.958	11.051	11.091	11.184	11.266	11.316	11.346	11.681	11.691	11.701	11.721	12.03	12.162	12.258	12.308	12.391	12.411	12.474	12.514
S-369	5.211	5.507	6.638	6.784	7.132	7.179	7.202	7.364	7.391	7.437	7.524	7.743	7.809	8.015	8.267	8.602	9.126	9.222	9.338	9.388	9.395	9.438	9.458	9.475	10.181	10.228	10.311	10.559	10.606	10.722	10.958	11.054	11.09	11.186	11.263	11.319	11.342	11.674	11.691	11.707	11.721	12.029	12.162	12.255	12.305	12.391	12.407	12.477	12.517
S-370	5.207	5.509	6.617	6.769	7.118	7.167	7.191	7.353	7.38	7.423	7.512	7.735	7.798	8.01	8.262	8.597	9.125	9.224	9.334	9.387	9.394	9.44	9.46	9.477	10.18	10.226	10.309	10.568	10.605	10.721	10.956	11.049	11.089	11.179	11.265	11.315	11.344	11.679	11.683	11.703	11.719	12.034	12.161	12.257	12.307	12.389	12.409	12.476	12.516
S-371	5.21	5.509	6.63	6.779	7.131	7.171	7.197	7.36	7.386	7.43	7.522	7.741	7.804	8.013	8.266	8.604	9.128	9.224	9.334	9.39	9.397	9.433	9.46	9.473	10.183	10.23	10.313	10.561	10.605	10.724	10.96	11.059	11.089	11.182	11.261	11.315	11.344	11.673	11.693	11.706	11.723	12.031	12.164	12.257	12.307	12.389	12.409	12.476	12.516
S-379	5.205	5.507	6.645	6.787	7.139	7.182	7.202	7.368	7.391	7.438	7.527	7.743	7.803	8.015	8.267	8.599	9.123	9.223	9.332	9.389	9.395	9.435	9.458	9.475	10.181	10.228	10.311	10.556	10.603	10.722	10.958	11.047	11.09	11.183	11.26	11.316	11.343	11.678	11.691	11.704	11.721	12.029	12.159	12.258	12.305	12.388	12.408	12.477	12.514
C-001	5.203	5.508	6.66	6.819	7.147	7.19	7.214	7.376	7.4	7.446	7.536	7.751	7.811	8.02	8.272	8.604	9.128	9.224	9.337	9.39	9.397	9.433	9.46	9.476	10.183	10.226	10.312	10.558	10.608	10.724	10.956	11.049	11.089	11.185	11.261	11.314	11.341	11.676	11.689	11.703	11.719	12.031	12.16	12.257	12.306	12.389	12.409	12.476	12.515
C-003	5.205	5.504	6.619	6.768	7.123	7.166	7.189	7.352	7.382	7.425	7.514	7.733	7.8	8.009	8.264	8.599	9.127	9.223	9.336	9.389	9.395	9.429	9.455	9.472	10.182	10.228	10.311	10.56	10.606	10.723	10.958	11.061	11.091	11.184	11.26	11.313	11.343	11.675	11.688	11.705	11.721	12.033	12.162	12.259	12.305	12.388	12.408	12.474	12.514
C-004	5.245	5.587	6.685	6.814	7.156	7.202	7.225	7.391	7.411	7.458	7.547	7.753	7.823	8.025	8.271	8.602	9.13	9.223	9.339	9.389	9.395	9.432	9.458	9.475	10.182	10.228	10.311	10.56	10.61	10.722	10.958	11.047	11.091	11.184	11.263	11.313	11.339	11.668	11.684	11.704	11.721	12.03	12.159	12.249	12.305	12.388	12.408	12.474	12.514
C-009	5.203	5.505	6.623	6.765	7.117	7.16	7.184	7.349	7.379	7.416	7.512	7.738	7.794	8.01	8.262	8.597	9.124	9.224	9.333	9.39	9.396	9.43	9.456	9.473	10.183	10.229	10.312	10.574	10.607	10.72	10.956	11.052	11.088	11.188	11.264	11.314	11.344	11.672	11.692	11.702	11.719	12.031	12.163	12.26	12.306	12.392	12.409	12.475	12.515
C-012	5.218	5.509	6.621	6.767	7.112	7.155	7.178	7.351	7.364	7.407	7.5	7.729	7.795	8.004	8.257	8.598	9.126	9.219	9.331	9.385	9.395	9.438	9.458	9.474	10.181	10.227	10.31	10.556	10.605	10.718	10.96	11.053	11.09	11.183	11.266	11.312	11.345	11.677	11.69	11.704	11.72	12.029	12.155	12.254	12.307	12.387	12.41	12.477	12.513
C-015	5.204	5.516	6.66	6.8	7.145	7.191	7.211	7.377	7.407	7.443	7.536	7.752	7.815	8.017	8.27	8.601	9.129	9.228	9.335	9.388	9.394	9.434	9.457	9.474	10.181	10.224	10.313	10.565	10.605	10.721	10.96	11.046	11.09	11.186	11.262	11.315	11.345	11.677	11.69	11.71	11.72	12.028	12.158	12.257	12.304	12.39	12.413	12.476	12.513
C-019	5.241	5.52	6.684	6.824	7.155	7.205	7.225	7.391	7.414	7.457	7.547	7.756	7.826	8.021	8.27	8.605	9.129	9.222	9.338	9.392	9.398	9.435	9.458	9.474	10.181	10.228	10.314	10.559	10.606	10.719	10.958	11.047	11.09	11.183	11.266	11.316	11.342	11.671	11.687	11.701	11.721	12.029	12.159	12.255	12.308	12.387	12.411	12.474	12.517
C-020	5.205	5.507	6.658	6.794	7.143	7.186	7.209	7.375	7.398	7.445	7.534	7.747	7.816	8.019	8.267	8.599	9.127	9.223	9.336	9.389	9.395	9.435	9.455	9.475	10.182	10.228	10.311	10.56	10.606	10.719	10.955	11.051	11.091	11.184	11.26	11.313	11.343	11.675	11.688	11.711	11.718	12.033	12.159	12.252	12.305	12.388	12.411	12.474	12.514
C-023	5.207	5.508	6.62	6.776	7.121	7.167	7.19	7.356	7.383	7.426	7.516	7.735	7.804	8.01	8.265	8.601	9.125	9.221	9.334	9.39	9.397	9.437	9.46	9.476	10.183	10.23	10.309	10.561	10.608	10.724	10.959	11.049	11.092	11.188	11.265	11.314	11.341	11.676	11.693	11.713	11.719	12.034	12.157	12.257	12.306	12.389	12.406	12.476	12.515
C-025	5.209	5.507	6.645	6.788	7.136	7.183	7.203	7.368	7.395	7.438	7.528	7.743	7.81	8.015	8.264	8.603	9.127	9.22	9.336	9.389	9.396	9.439	9.459	9.475	10.182	10.232	10.311	10.56	10.607	10.723	10.958	11.048	11.091	11.184	11.267	11.313	11.343	11.675	11.691	11.701	11.718	12.033	12.159	12.255	12.305	12.388	12.408	12.474	12.514
C-027	5.25	5.552	6.68	6.816	7.158	7.205	7.224	7.39	7.414	7.457	7.546	7.752	7.822	8.021	8.273	8.605	9.129	9.222	9.338	9.388	9.394	9.431	9.461	9.474	10.181	10.224	10.313	10.555	10.609	10.721	10.96	11.046	11.09	11.176	11.265	11.315	11.342	11.677	11.69	11.707	11.72	12.032	12.158	12.254	12.307	12.387	12.407	12.476	12.513
C-031	5.245	5.587	6.682	6.811	7.156	7.203	7.223	7.392	7.412	7.458	7.545	7.757	7.82	8.022	8.268	8.603	9.127	9.223	9.336	9.389	9.396	9.436	9.459	9.476	10.182	10.225	10.312	10.557	10.604	10.723	10.959	11.045	11.091	11.181	11.264	11.314	11.343	11.672	11.692	11.702	11.722	12.027	12.16	12.253	12.306	12.389	12.408	12.475	12.515
C-035	5.206	5.508	6.623	6.769	7.114	7.164	7.19	7.353	7.379	7.423	7.515	7.738	7.797	8.01	8.259	8.597	9.128	9.224	9.337	9.39	9.393	9.433	9.456	9.476	10.18	10.226	10.312	10.561	10.604	10.72	10.956	11.055	11.089	11.188	11.264	11.314	11.341	11.679	11.692	11.709	11.719	12.027	12.16	12.256	12.306	12.389	12.409	12.475	12.512
C-037	5.208	5.504	6.638	6.781	7.129	7.176	7.199	7.358	7.388	7.431	7.524	7.74	7.809	8.012	8.261	8.596	9.126	9.223	9.335	9.385	9.395	9.428	9.455	9.472	10.182	10.231	10.311	10.56	10.606	10.719	10.958	11.051	11.091	11.187	11.263	11.313	11.346	11.674	11.688	11.704	11.721	12.029	12.159	12.252	12.305	12.388	12.404	12.474	12.514
C-042	5.205	5.507	6.625	6.775	7.123	7.173	7.196	7.359	7.382	7.428	7.521	7.733	7.8	8.012	8.264	8.599	9.13	9.223	9.336	9.389	9.396	9.432	9.459	9.472	10.182	10.232	10.308	10.564	10.607	10.719	10.958	11.051	11.088	11.181	11.264	11.313	11.343	11.675	11.692	11.698	11.718	12.033	12.159	12.256	12.309	12.388	12.408	12.475	12.514
C-043	5.201	5.503	6.628	6.774	7.122	7.166	7.185	7.355	7.378	7.421	7.514	7.733	7.796	8.008	8.26	8.599	9.126	9.223	9.335	9.388	9.395	9.432	9.455	9.475	10.181	10.228	10.314	10.56	10.606	10.719	10.958	11.057	11.09	11.183	11.263	11.313	11.346	11.671	11.688	11.701	11.721	12.033	12.162	12.255	12.305	12.388	12.408	12.477	12.517
C-046	5.258	5.587	6.682	6.828	7.156	7.202	7.226	7.392	7.411	7.455	7.544	7.757	7.823	8.022	8.271	8.603	9.127	9.223	9.336	9.386	9.395	9.432	9.455	9.475	10.182	10.228	10.311	10.557	10.603	10.719	10.955	11.048	11.087	11.18	11.26	11.313	11.34	11.678	11.688	11.708	11.721	12.03	12.159	12.259	12.305	12.388	12.408	12.474	12.514
C-050	5.202	5.504	6.638	6.778	7.129	7.176	7.199	7.365	7.388	7.434	7.524	7.743	7.806	8.015	8.267	8.602	9.127	9.223	9.336	9.389	9.395	9.432	9.455	9.475	10.182	10.228	10.311	10.563	10.606	10.719	10.958	11.051	11.091	11.187	11.26	11.313	11.343	11.678	11.691	11.698	11.721	12.03	12.159	12.258	12.305	12.388	12.411	12.474	12.514
C-051	5.239	5.581	6.679	6.812	7.154	7.203	7.223	7.389	7.412	7.455	7.545	7.754	7.82	8.019	8.268	8.603	9.124	9.224	9.333	9.386	9.393	9.436	9.453	9.473	10.179	10.222	10.309	10.557	10.604	10.717	10.956	11.045	11.088	11.185	11.264	11.314	11.34	11.672	11.686	11.702	11.719	12.027	12.157	12.253	12.303	12.386	12.409	12.475	12.512
C-052	5.21	5.509	6.617	6.779	7.121	7.168	7.194	7.357	7.383	7.426	7.519	7.735	7.805	8.014	8.262	8.598	9.125	9.225	9.334	9.387	9.394	9.434	9.457	9.473	10.18	10.227	10.31	10.562	10.605	10.724	10.956	11.049	11.089	11.185	11.265	11.315	11.341	11.676	11.69	11.706	11.72	12.031	12.157	12.257	12.303	12.386	12.41	12.476	12.512
C-053	5.245	5.587	6.682	6.811	7.156	7.203	7.223	7.388	7.412	7.455	7.544	7.757	7.823	8.022	8.271	8.599	9.127	9.223	9.336	9.389	9.396	9.435	9.455	9.475	10.179	10.228	10.311	10.557	10.603	10.723	10.958	11.048	11.088	11.184	11.26	11.313	11.343	11.672	11.692	11.708	11.718	12.03	12.159	12.256	12.305	12.388	12.408	12.475	12.514
C-055	5.238	5.583	6.681	6.81	7.155	7.202	7.225	7.391	7.414	7.457	7.543	7.752	7.822	8.021	8.277	8.605	9.129	9.222	9.335	9.391	9.395	9.434	9.458	9.478	10.181	10.224	10.31	10.559	10.606	10.722	10.957	11.047	11.087	11.186	11.266	11.312	11.345	11.671	11.687	11.7	11.72	12.032	12.158	12.254	12.304	12.387	12.404	12.473	12.513
C-057	5.209	5.507	6.629	6.784	7.126	7.173	7.196	7.358	7.385	7.428	7.521	7.743	7.806	8.012	8.264	8.599	9.127	9.226	9.332	9.389	9.395	9.435	9.455	9.475	10.178	10.225	10.311	10.563	10.606	10.719	10.958	11.048	11.088	11.187	11.257	11.313	11.343	11.671	11.688	11.701	11.718	12.033	12.159	12.255	12.305	12.388	12.408	12.474	12.514
C-058	5.21	5.509	6.624	6.773	7.125	7.171	7.194	7.357	7.383	7.43	7.519	7.742	7.805	8.014	8.266	8.598	9.132	9.221	9.334	9.387	9.397	9.437	9.46	9.474	10.18	10.227	10.31	10.562	10.605	10.718	10.957	11.049	11.089	11.185	11.262	11.312	11.341	11.677	11.69	11.7	11.72	12.028	12.158	12.257	12.304	12.387	12.406	12.473	12.513
C-066	5.21	5.505	6.64	6.789	7.137	7.177	7.201	7.366	7.393	7.436	7.526	7.738	7.808	8.013	8.266	8.594	9.128	9.221	9.334	9.387	9.394	9.433	9.46	9.473	10.18	10.226	10.309	10.561	10.605	10.721	10.956	11.046	11.089	11.182	11.261	11.314	11.341	11.673	11.686	11.703	11.719	12.028	12.161	12.25	12.303	12.389	12.409	12.476	12.512
C-067	5.21	5.508	6.623	6.779	7.114	7.164	7.191	7.353	7.376	7.423	7.512	7.735	7.798	8.007	8.259	8.591	9.121	9.221	9.33	9.384	9.393	9.437	9.457	9.466	10.176	10.23	10.309	10.561	10.601	10.721	10.953	11.049	11.089	11.185	11.268	11.311	11.338	11.676	11.679	11.709	11.719	12.031	12.157	12.257	12.306	12.389	12.406	12.476	12.515
C-069	5.21	5.505	6.643	6.789	7.134	7.181	7.204	7.366	7.39	7.436	7.526	7.741	7.811	8.013	8.266	8.597	9.128	9.224	9.334	9.387	9.397	9.433	9.457	9.477	10.18	10.226	10.309	10.551	10.605	10.717	10.956	11.046	11.089	11.188	11.261	11.315	11.344	11.673	11.689	11.699	11.719	12.035	12.157	12.25	12.307	12.39	12.409	12.472	12.512
C-074	5.205	5.507	6.625	6.784	7.126	7.169	7.195	7.358	7.384	7.427	7.52	7.736	7.806	8.011	8.267	8.595	9.126	9.222	9.335	9.392	9.395	9.435	9.455	9.475	10.181	10.228	10.311	10.559	10.606	10.719	10.958	11.047	11.09	11.186	11.263	11.313	11.342	11.677	11.687	11.704	11.721	12.029	12.159	12.255	12.305	12.387	12.407	12.474	12.51
C-079	5.208	5.51	6.624	6.78	7.129	7.172	7.195	7.361	7.387	7.431	7.52	7.739	7.809	8.014	8.26	8.602	9.129	9.222	9.335	9.388	9.395	9.438	9.458	9.474	10.181	10.231	10.31	10.556	10.609	10.718	10.957	11.05	11.09	11.183	11.263	11.312	11.342	11.674	11.687	11.704	11.72	12.029	12.158	12.258	12.304	12.387	12.41	12.474	12.513
C-081	5.21	5.508	6.62	6.779	7.121	7.167	7.19	7.356	7.383	7.426	7.516	7.738	7.804	8.01	8.265	8.594	9.125	9.221	9.334	9.387	9.393	9.433	9.453	9.476	10.18	10.226	10.309	10.565	10.604	10.72	10.959	11.049	11.089	11.185	11.268	11.311	11.344	11.669	11.689	11.703	11.719	12.028	12.157	12.253	12.303	12.386	12.409	12.472	12.512
C-082	5.209	5.507	6.619	6.771	7.113	7.16	7.186	7.349	7.375	7.418	7.511	7.733	7.8	8.006	8.261	8.596	9.124	9.22	9.333	9.386	9.396	9.435	9.452	9.472	10.179	10.228	10.311	10.563	10.603	10.719	10.958	11.051	11.088	11.184	11.257	11.313	11.343	11.675	11.685	11.701	11.718	12.027	12.159	12.256	12.305	12.388	12.408	12.474	12.514
C-085	5.213	5.508	6.616	6.779	7.12	7.167	7.19	7.353	7.379	7.422	7.515	7.734	7.797	8.01	8.258	8.597	9.124	9.224	9.333	9.386	9.393	9.433	9.456	9.476	10.179	10.219	10.309	10.561	10.604	10.723	10.956	11.055	11.088	11.181	11.258	11.314	11.341	11.672	11.686	11.699	11.719	12.031	12.16	12.256	12.303	12.389	12.409	12.475	12.515
C-089	5.207	5.509	6.631	6.776	7.128	7.168	7.195	7.357	7.384	7.427	7.516	7.735	7.802	8.011	8.266	8.595	9.129	9.225	9.334	9.384	9.394	9.431	9.457	9.474	10.18	10.227	10.31	10.559	10.605	10.721	10.957	11.05	11.09	11.186	11.265	11.312	11.345	11.673	11.687	11.697	11.72	12.032	12.158	12.254	12.304	12.387	12.41	12.476	12.513
C-091	5.206	5.505	6.643	6.789	7.134	7.18	7.203	7.369	7.392	7.439	7.528	7.744	7.807	8.016	8.268	8.6	9.128	9.22	9.333	9.39	9.396	9.433	9.456	9.473	10.179	10.229	10.312	10.557	10.604	10.72	10.959	11.048	11.088	11.185	11.264	11.311	11.344	11.672	11.689	11.702	11.719	12.031	12.16	12.253	12.306	12.389	12.409	12.475	12.515
C-092	5.212	5.511	6.622	6.771	7.12	7.166	7.189	7.352	7.378	7.422	7.515	7.737	7.8	8.009	8.264	8.593	9.127	9.223	9.333	9.386	9.396	9.432	9.455	9.475	10.182	10.225	10.308	10.56	10.603	10.719	10.958	11.051	11.091	11.184	11.26	11.313	11.343	11.668	11.688	11.705	11.721	12.033	12.159	12.259	12.302	12.392	12.411	12.475	12.514
C-094	5.212	5.508	6.636	6.775	7.13	7.173	7.196	7.359	7.386	7.429	7.522	7.734	7.8	8.009	8.258	8.593	9.124	9.22	9.333	9.386	9.393	9.433	9.452	9.472	10.179	10.222	10.312	10.561	10.604	10.723	10.955	11.048	11.088	11.178	11.261	11.314	11.34	11.675	11.682	11.705	11.718	12.027	12.156	12.253	12.302	12.385	12.412	12.472	12.511
C-095	5.212	5.508	6.622	6.775	7.127	7.17	7.193	7.356	7.385	7.425	7.518	7.74	7.807	8.013	8.265	8.596	9.127	9.22	9.336	9.389	9.396	9.436	9.452	9.476	10.179	10.225	10.312	10.557	10.604	10.716	10.955	11.048	11.088	11.181	11.264	11.31	11.34	11.675	11.689	11.702	11.718	12.03	12.16	12.253	12.302	12.389	12.409	12.475	12.515
C-096	5.212	5.504	6.636	6.785	7.13	7.173	7.203	7.362	7.389	7.432	7.522	7.741	7.81	8.013	8.265	8.6	9.131	9.22	9.336	9.389	9.396	9.439	9.456	9.476	10.179	10.226	10.308	10.561	10.604	10.72	10.955	11.048	11.091	11.184	11.267	11.317	11.344	11.679	11.689	11.705	11.719	12.03	12.16	12.256	12.312	12.405	12.415	12.488	12.528
C-097	5.21	5.509	6.62	6.769	7.118	7.158	7.187	7.35	7.38	7.42	7.509	7.735	7.798	8.007	8.262	8.594	9.125	9.221	9.334	9.387	9.397	9.437	9.457	9.477	10.18	10.226	10.309	10.558	10.605	10.721	10.956	11.049	11.089	11.182	11.262	11.311	11.341	11.676	11.69	11.7	11.719	12.028	12.161	12.254	12.303	12.39	12.41	12.476	12.516
[truncated: 24 more columns]

## Sheet: mz
Sample	X.8892..hexanoic.acid..7.11..Results	X.5950..L.alanine.1..7.4748..Results	X.6287..L.valine.2..9.151..Results	X.1176..urea..9.599..Results	X.700..ethanolamine..9.879..Results	X.6106..L.leucine.2..9.945..Results	X.753..glycerol..9.941..Results	X.938..nicotinic.acid..10.27..Results	X.791..DL.isoleucine.2..10.225..Results	X.145742..L.proline.2..10.321..Results	X.750..glycine..10.456..Results	X.439194..glyceric.acid..10.735..Results	X.638129..citraconic.acid..10.792..Results	X.5951..L.serine.2..11.174..Results	X.6288..L.threonine.2..11.464..Results	X.239..Beta..alanine..1..12.044..Results	X.92824..D.malic.acid..12.794..Results	X.649..5.6.dihydrouracil.2..12.773..Results	X.169019..D.threitol..12.954..Results	X.6137..L.methionine.2..13.188..Results	X.5960..aspartic.acid.2..13.207..Results	X.597..cytosine.2..13.255..Results	X.5810..trans.4.hydroxy.L.proline.2..13.267..Results	X.119..gamma.aminobutyric.acid..GABA...13.326..Results	X.33032..L.glutamic.acid.2..14.398..Results	X.135..4.hydroxybenzoic.acid..14.505..Results	X.236..L.asparagine.1..14.496..Results	X.66308..arabinose..14.897..Results	X.439240..D.lyxose.2..14.889..Results	X.993..ribose..15.113..Results	X.6912..xylitol..15.376..Results	X.94154..arabitol..15.601..Results	X.827..ribitol..15.66..Results	X.42953..diglycerol.2..15.958..Results	X.8468..4.hydroxy.3.methoxybenzoic.acid..15.989..Results	X.754..glycerol.1.phosphate..16.056..Results	X.738..L.glutamine.3..16.092..Results	X.72..3.4.dihydroxybenzoic.acid..16.586..Results	X.6262..L.ornithine.2..16.632..Results	X.9750..citrulline.2..16.691..Results	X.311..citric.acid..16.615..Results	X.190..adenine.1..17.066..Results	X.5984..fructose.1..17.18..Results	X.204..allantoin.2..17.356..Results	X.441032..D....altrose.1..17.397..Results	X.5962..L.lysine.2..17.643..Results	X.6274..L.histidine.3..17.658..Results	X.24749..D.glucose.2..17.625..Results	X.6057..tyrosine.2..17.871..Results
S-038	173.096	116.087	144.117	189.084	174.11	158.133	117.035	180.045	158.133	142.102	174.11	292.129	241.078	204.12	219.107	248.128	245.062	243.094	217.104	176.089	232.115	254.11	230.135	174.11	246.13	267.082	188.089	217.104	217.104	217.104	217.104	217.104	319.153	217.104	297.092	357.108	156.081	370.136	142.102	256.162	273.093	264.105	307.153	518.233	319.153	156.117	154.089	319.153	218.099
S-255	173.096	116.087	144.118	189.084	174.11	158.133	117.035	180.044	158.133	142.102	174.11	292.129	241.078	204.12	219.107	248.127	245.063	243.094	217.104	176.089	232.115	254.111	230.135	174.11	246.13	267.082	188.089	217.104	217.103	217.104	217.103	217.104	319.153	217.103	297.092	357.108	156.081	370.137	142.102	256.162	273.093	264.105	307.153	518.234	319.153	156.118	154.089	319.153	218.099
S-200	173.095	116.087	144.117	189.084	174.11	158.133	117.034	180.044	158.133	142.102	174.11	292.129	241.078	204.12	219.106	248.127	245.062	243.094	217.103	176.089	232.114	254.109	230.134	174.11	246.13	267.082	188.089	217.103	217.103	217.104	217.104	217.103	319.153	217.104	297.092	357.109	156.081	370.135	142.102	256.161	273.093	264.105	307.153	518.232	319.152	156.118	154.089	319.152	218.099
S-196	173.096	116.087	144.117	189.084	174.11	158.133	117.035	180.044	158.133	142.102	174.11	292.131	241.078	204.12	219.107	248.129	245.061	243.094	217.104	176.089	232.115	254.109	230.135	174.11	246.13	267.082	188.089	217.104	217.103	217.104	217.104	217.104	319.153	217.104	297.092	357.108	156.081	370.142	142.102	256.162	273.093	264.106	307.153	518.234	319.153	156.118	154.09	319.152	218.099
S-367	173.095	116.087	144.117	189.084	174.11	158.133	117.035	180.044	158.133	142.102	174.11	292.128	241.078	204.12	219.107	248.127	245.062	243.094	217.104	176.09	232.114	254.11	230.135	174.11	246.13	267.082	188.089	217.103	217.104	217.104	217.104	217.104	319.153	217.104	297.093	357.109	156.082	370.137	142.102	256.161	273.093	264.105	307.153	518.233	319.153	156.118	154.089	319.152	218.099
S-366	173.096	116.087	144.117	189.084	174.11	158.133	117.035	180.044	158.133	142.102	174.11	292.13	241.078	204.12	219.107	248.127	245.061	243.094	217.103	176.089	232.114	254.109	230.135	174.11	246.13	267.082	188.089	217.103	217.104	217.103	217.104	217.104	319.153	217.104	297.092	357.109	156.081	370.138	142.102	256.162	273.093	264.105	307.152	518.233	319.152	156.118	154.089	319.153	218.099
S-303	173.095	116.087	144.118	189.084	174.11	158.133	117.034	180.044	158.133	142.102	174.11	292.13	241.078	204.12	219.107	248.128	245.062	243.094	217.104	176.09	232.115	254.109	230.135	174.11	246.13	267.082	188.089	217.104	217.104	217.104	217.103	NA	319.153	217.103	297.093	357.108	156.082	370.134	142.102	256.162	273.093	264.105	307.153	518.233	319.152	156.118	154.089	319.152	218.099
S-347	173.096	116.087	144.118	189.084	174.11	158.133	117.035	180.044	158.133	142.102	174.11	292.13	241.078	204.12	219.107	248.128	245.062	243.094	217.103	176.089	232.115	254.109	230.135	174.11	246.13	267.082	188.089	217.104	217.104	217.104	217.104	NA	319.153	217.103	297.093	357.108	156.082	370.139	142.102	256.161	273.093	264.105	307.152	518.234	319.153	156.117	154.089	319.152	218.099
S-223	173.096	116.087	144.118	189.085	174.11	158.133	117.035	180.044	158.133	142.102	174.11	292.129	241.078	204.12	219.107	248.128	245.062	243.094	217.104	176.089	232.115	254.109	230.135	174.11	246.13	267.083	188.089	217.104	217.104	217.104	217.104	217.104	319.153	217.104	297.093	357.109	156.081	370.137	142.102	256.162	273.093	264.105	307.154	518.233	319.153	156.118	154.09	319.153	218.099
S-043	173.096	116.087	144.117	189.084	174.11	158.133	117.035	180.044	158.133	142.102	174.11	292.129	241.078	204.12	219.107	248.128	245.062	243.094	217.104	176.089	232.114	254.109	230.134	174.11	246.13	267.083	188.089	217.103	217.103	217.103	217.104	217.104	319.153	217.103	297.092	357.109	156.081	370.138	142.102	256.162	273.093	264.105	307.153	518.233	319.152	156.118	154.09	319.153	218.099
S-003	173.096	116.087	144.118	189.084	174.11	158.133	117.035	180.044	158.133	142.102	174.11	292.131	241.078	204.12	219.107	248.127	245.061	243.094	217.104	176.089	232.115	254.11	230.136	174.11	246.13	267.082	188.089	217.103	217.104	217.104	217.104	NA	319.153	217.104	297.092	357.108	156.082	370.138	142.102	256.162	273.093	264.105	307.153	518.233	319.152	156.118	154.09	319.152	218.099
S-046	173.097	116.087	144.117	189.084	174.11	158.133	117.035	180.044	158.133	142.102	174.11	292.129	241.078	204.12	219.107	248.127	245.062	243.094	217.104	176.088	232.114	254.109	230.135	174.11	246.13	267.082	188.089	217.103	217.104	217.104	217.104	217.104	319.153	217.104	297.092	357.108	156.081	370.139	142.102	256.161	273.093	264.106	307.153	518.234	319.153	156.118	154.089	319.152	218.099
S-106	173.096	116.087	144.118	189.084	174.11	158.133	117.035	180.044	158.133	142.102	174.11	292.128	241.078	204.12	219.107	248.127	245.062	243.094	217.104	176.089	232.114	254.11	230.135	174.11	246.13	267.082	188.089	217.103	217.104	217.104	217.104	217.104	319.153	217.103	297.092	357.109	156.082	370.139	142.102	256.162	273.093	264.104	307.153	518.233	319.153	156.117	154.089	319.152	218.099
S-085	173.096	116.087	144.118	189.084	174.11	158.133	117.035	180.044	158.133	142.102	174.11	292.129	241.078	204.12	219.107	248.127	245.062	243.094	217.104	176.089	232.115	254.109	230.136	174.111	246.13	267.082	188.089	217.104	217.104	217.104	217.104	217.104	319.153	217.103	297.092	357.109	156.082	370.137	142.102	256.162	273.093	264.105	307.153	518.232	319.153	156.118	154.089	319.152	218.099
S-067	173.095	116.087	144.118	189.084	174.11	158.133	117.035	180.044	158.133	142.102	174.11	292.129	241.078	204.12	219.107	248.127	245.062	243.094	217.104	176.089	232.114	254.11	230.135	174.11	246.13	267.082	188.089	217.104	217.103	217.104	217.104	217.103	319.153	217.104	297.092	357.108	156.081	370.141	142.102	256.161	273.093	264.106	307.153	518.233	319.152	156.118	154.09	319.153	218.099
S-057	173.096	116.087	144.117	189.084	174.109	158.133	117.035	180.045	158.133	142.102	174.11	292.129	241.079	204.12	219.106	248.128	245.061	243.094	217.104	176.089	232.115	254.11	230.135	174.11	246.13	267.082	188.089	217.104	217.104	217.104	217.104	217.104	319.153	217.104	297.093	357.109	156.082	370.134	142.102	256.162	273.093	264.105	307.153	518.234	319.153	156.118	154.089	319.153	218.099
S-294	173.096	116.087	144.118	189.084	174.11	158.133	117.035	180.045	158.133	142.102	174.11	292.128	241.078	204.12	219.106	248.127	245.064	243.097	217.106	176.091	232.117	254.112	230.138	174.112	246.133	267.085	188.091	217.106	217.106	217.106	217.106	NA	319.156	217.106	297.096	357.112	156.083	370.142	142.103	256.166	273.095	264.108	307.156	518.238	319.156	156.119	NA	319.156	218.101
S-225	173.096	116.087	144.118	189.084	174.11	158.133	117.035	180.045	158.133	142.102	174.11	292.129	241.079	204.12	219.107	248.128	245.062	243.094	217.104	176.089	232.114	254.11	230.135	174.11	246.13	267.083	188.089	217.103	217.104	217.104	217.104	217.104	319.153	217.104	297.093	357.108	156.082	370.14	142.102	256.162	273.093	264.105	307.153	518.233	319.153	156.118	154.089	319.153	218.099
S-322	173.095	116.087	144.118	189.084	174.11	158.133	117.035	180.045	158.133	142.102	174.11	292.129	241.078	204.12	219.107	248.128	245.061	243.094	217.103	176.088	232.115	254.109	230.135	174.11	246.13	267.083	188.089	217.104	217.104	217.104	217.104	217.104	319.153	217.104	297.094	357.109	156.082	370.139	142.102	256.163	273.093	264.105	307.153	518.234	319.153	156.118	154.089	319.153	218.099
S-005	173.097	116.088	144.119	189.086	174.112	158.135	117.036	180.047	158.134	142.104	174.112	292.132	241.081	204.122	219.109	248.13	245.064	243.096	217.106	176.091	232.116	254.112	230.136	174.111	246.132	267.085	188.091	217.122	217.105	217.106	217.106	217.106	319.156	217.106	297.094	357.112	156.083	370.141	142.103	256.164	273.095	264.108	307.155	518.237	319.155	156.119	154.09	319.155	218.101
S-016	173.096	116.087	144.117	189.084	174.11	158.133	117.035	180.045	158.133	142.102	174.11	292.131	241.079	204.12	219.107	248.128	245.062	243.094	217.104	176.089	232.114	254.109	230.135	174.11	246.13	267.082	188.089	217.103	217.104	217.103	217.103	NA	319.153	217.104	297.093	357.108	156.081	370.139	142.102	256.16	273.093	264.105	307.153	518.233	319.153	156.117	154.089	319.152	218.099
S-049	173.095	116.087	144.117	189.084	174.11	158.133	117.035	180.045	158.133	142.102	174.11	292.129	241.078	204.12	219.106	248.128	245.062	243.094	217.104	176.089	232.115	254.109	NA	174.109	246.13	267.082	188.089	217.104	217.104	217.104	217.104	217.104	319.153	217.103	297.092	357.108	156.082	370.138	142.102	256.161	273.093	264.105	307.153	518.233	319.153	156.118	154.089	319.153	218.099
S-054	173.095	116.087	144.118	189.084	174.11	158.133	117.035	180.044	158.133	142.102	174.11	292.13	241.078	204.12	219.107	248.126	245.061	243.094	217.104	176.089	232.115	254.11	230.135	174.11	246.13	267.082	188.089	217.104	217.104	217.104	217.103	217.104	319.153	217.104	297.093	357.108	156.082	370.14	142.102	256.162	273.093	264.105	307.153	518.232	319.153	156.118	154.089	319.153	218.099
S-063	173.096	116.087	144.117	189.084	174.11	158.133	117.035	180.045	158.133	142.102	174.11	292.129	241.078	204.12	219.106	248.127	245.06	243.094	217.104	176.089	232.114	254.109	230.134	174.11	246.13	267.082	188.089	217.104	217.104	217.103	217.104	NA	319.153	217.104	297.091	357.109	156.081	370.137	142.102	256.162	273.093	264.105	307.153	518.233	319.152	156.118	154.089	319.153	218.099
S-102	173.096	116.087	144.118	189.084	174.11	158.133	117.035	180.044	158.133	142.102	174.11	292.13	241.078	204.12	219.107	248.128	245.062	243.094	217.104	176.089	232.114	254.111	230.135	174.11	246.13	267.082	188.089	217.103	217.104	217.104	217.104	217.104	319.153	217.104	297.091	357.108	156.081	370.138	142.102	256.162	273.093	264.105	307.153	518.232	319.152	156.118	154.089	319.153	218.099
S-103	173.096	116.087	144.117	189.084	174.11	158.133	117.035	180.044	158.133	142.102	174.11	292.128	241.078	204.12	219.106	248.128	245.062	243.094	217.104	176.089	232.115	254.111	230.135	174.11	246.13	267.082	188.089	217.105	217.104	217.104	217.103	217.104	319.153	217.104	297.094	357.109	156.082	370.138	142.102	256.161	273.093	264.105	307.153	518.233	319.153	156.118	154.089	319.153	218.099
S-120	173.096	116.087	144.118	189.084	174.11	158.133	117.035	180.044	158.133	142.102	174.11	292.13	241.079	204.12	219.107	248.128	245.062	243.094	217.104	176.09	232.115	254.111	230.135	174.11	246.13	267.082	188.089	217.104	217.103	217.104	217.104	217.104	319.153	217.103	297.092	357.109	156.081	370.138	142.102	256.162	273.093	264.105	307.153	518.233	319.152	156.118	154.09	319.153	218.099
S-145	173.096	116.087	144.118	189.084	174.11	158.133	117.035	180.044	158.133	142.102	174.11	292.129	241.078	204.12	219.107	248.127	245.062	243.094	217.104	176.089	232.115	254.11	230.135	174.11	246.13	267.082	188.089	217.103	217.104	217.104	217.104	NA	319.153	217.103	297.092	357.109	156.081	370.138	142.102	256.161	273.093	264.105	307.153	518.233	319.153	156.118	154.089	319.153	218.099
S-154	173.096	116.087	144.118	189.084	174.11	158.133	117.035	180.044	158.133	142.102	174.11	292.13	241.078	204.12	219.106	248.127	245.062	243.094	217.104	176.089	232.114	254.109	230.135	174.11	246.13	267.082	188.089	217.104	217.104	217.104	217.103	217.104	319.152	217.103	297.093	357.108	156.081	370.137	142.102	256.161	273.093	264.105	307.153	518.233	319.152	156.118	154.089	319.152	218.099
S-156	173.096	116.087	144.117	189.084	174.109	158.133	117.035	180.044	158.133	142.102	174.11	292.127	241.078	204.12	219.106	248.127	245.061	243.094	217.103	176.089	232.114	254.109	230.134	174.11	246.13	267.082	188.089	217.103	217.104	217.103	217.103	NA	319.153	217.103	297.092	357.108	156.081	370.136	142.102	256.162	273.093	264.105	307.153	518.232	319.153	156.118	154.089	319.152	218.099
S-159	173.096	116.087	144.117	189.084	174.109	158.133	117.035	180.044	158.133	142.102	174.11	292.129	241.078	204.12	219.107	248.127	245.062	243.094	217.104	176.089	232.115	254.108	230.135	174.109	246.13	267.082	188.089	217.103	217.103	217.103	217.104	NA	319.152	217.103	297.092	357.108	156.082	370.136	142.101	256.161	273.093	264.105	307.152	518.232	319.152	156.118	154.09	319.152	218.099
S-174	173.096	116.087	144.117	189.084	174.109	158.133	117.034	180.044	158.133	142.102	174.11	292.126	241.078	204.12	219.107	248.126	245.062	243.094	217.103	176.089	232.114	254.108	230.135	174.109	246.13	267.082	188.089	217.103	217.103	217.104	217.103	NA	319.152	217.103	297.093	357.108	156.081	370.138	142.102	256.161	273.093	264.105	307.152	518.232	319.152	156.118	154.089	319.152	218.099
S-191	173.096	116.087	144.117	189.084	174.11	158.133	117.034	180.044	158.133	142.102	174.11	292.128	241.077	204.12	219.106	248.127	245.061	243.094	217.103	176.088	232.114	254.109	230.135	174.11	246.13	267.082	188.089	217.104	217.104	217.103	217.104	217.103	319.152	217.105	297.092	357.108	156.082	370.138	142.101	256.161	273.092	264.104	307.152	518.232	319.152	156.118	154.089	319.152	218.099
S-206	173.096	116.087	144.117	189.084	174.11	158.133	117.034	180.044	158.133	142.102	174.11	292.13	241.078	204.12	219.106	248.127	245.062	243.094	217.104	176.089	232.115	254.109	230.136	174.11	246.13	267.082	188.089	217.104	217.104	217.104	217.104	217.104	319.153	217.103	297.092	357.108	156.081	370.139	142.102	256.161	273.093	264.105	307.152	518.232	319.153	156.118	154.089	319.152	218.099
S-214	173.096	116.087	144.117	189.084	174.11	158.133	117.035	180.044	158.133	142.102	174.11	292.129	241.078	204.12	219.106	248.127	245.062	243.094	217.104	176.089	232.115	254.11	230.135	174.11	246.13	267.082	188.089	217.103	217.103	217.104	217.104	217.104	319.153	217.104	297.092	357.108	156.081	370.138	142.102	256.161	273.093	264.105	307.152	518.233	319.152	156.117	154.089	319.152	218.099
S-270	173.096	116.087	144.117	189.084	174.11	158.133	117.034	180.044	158.133	142.102	174.11	292.13	241.078	204.12	219.106	248.127	245.061	243.094	217.103	176.089	232.114	254.111	230.135	174.11	246.13	267.082	188.089	217.104	217.104	217.103	217.103	217.104	319.153	217.103	297.092	357.109	156.082	370.136	142.102	256.161	273.093	264.105	307.153	518.233	319.152	156.117	154.089	319.152	218.099
S-285	173.096	116.087	144.117	189.084	174.11	158.133	117.035	180.044	158.133	142.102	174.11	292.13	241.078	204.12	219.106	248.127	245.061	243.094	217.104	176.089	232.114	254.109	230.134	174.11	246.13	267.082	188.089	217.103	217.103	217.104	217.104	NA	319.153	217.104	297.093	357.109	156.082	370.137	142.102	256.162	273.093	264.105	307.152	518.233	319.152	156.118	154.089	319.152	218.099
S-299	173.097	116.087	144.118	189.084	174.11	158.133	117.035	180.044	158.133	142.102	174.11	292.129	241.078	204.12	219.107	248.128	245.062	243.094	217.104	176.089	232.115	254.11	230.135	174.111	246.13	267.083	188.089	217.104	217.104	217.104	217.104	217.104	319.153	217.104	297.092	357.112	156.082	370.139	142.102	256.162	273.093	264.106	307.153	518.234	319.153	156.118	154.09	319.153	218.099
S-313	173.096	116.087	144.118	189.084	174.11	158.133	117.035	180.044	158.133	142.102	174.11	292.129	241.078	204.12	219.106	248.128	245.062	243.094	217.104	176.089	232.115	254.11	230.135	174.11	246.13	267.082	188.089	217.104	217.104	217.104	217.104	217.104	319.153	217.103	297.092	357.109	156.081	370.139	142.102	256.161	273.093	264.105	307.153	518.233	319.153	156.118	154.089	319.153	218.099
S-323	173.095	116.087	144.118	189.084	174.11	158.133	117.035	180.044	158.133	142.102	174.11	292.128	241.078	204.12	219.107	248.127	245.062	243.094	217.104	176.089	232.114	254.109	230.135	174.11	246.13	267.082	188.089	217.104	217.103	217.103	217.104	217.103	319.153	217.103	297.091	357.108	156.081	370.138	142.102	256.161	273.093	264.105	307.153	518.232	319.152	156.117	154.089	319.152	218.099
S-332	173.095	116.087	144.117	189.084	174.11	158.133	117.034	180.044	158.133	142.102	174.11	292.129	241.078	204.12	219.106	248.127	245.061	243.094	217.104	176.089	232.114	254.109	230.135	174.11	246.13	267.082	188.089	217.103	217.103	217.103	217.104	217.103	319.152	217.103	297.092	357.108	156.081	370.139	142.102	256.161	273.093	264.104	307.152	518.232	319.152	156.117	154.089	319.152	218.099
S-352	173.096	116.087	144.117	189.084	174.11	158.133	117.035	180.044	158.133	142.102	174.11	292.129	241.078	204.12	219.106	248.127	245.062	243.094	217.104	176.089	232.114	254.109	230.135	174.11	246.13	267.082	188.089	217.104	217.104	217.103	217.104	217.104	319.152	217.103	297.093	357.108	156.081	370.139	142.102	256.161	273.093	264.105	307.153	518.233	319.153	156.118	154.089	319.152	218.099
S-407	173.096	116.087	144.118	189.084	174.11	158.133	117.035	180.044	158.133	142.102	174.11	292.13	241.078	204.12	219.107	248.127	245.062	243.094	217.104	176.089	232.114	254.109	230.135	174.11	246.13	267.082	188.089	217.104	217.104	217.103	217.103	NA	319.153	217.104	297.093	357.108	156.082	370.138	142.102	256.161	273.092	264.105	307.153	518.232	319.153	156.118	154.089	319.152	218.099
S-260	173.096	116.087	144.117	189.084	174.109	158.133	117.035	180.044	158.133	142.102	174.11	292.13	241.078	204.12	219.107	248.127	245.062	243.094	217.104	176.089	232.114	254.109	230.135	174.11	246.13	267.082	188.089	217.103	217.103	217.104	217.103	217.104	319.152	217.103	297.091	357.109	156.082	370.14	142.102	256.161	273.092	264.105	307.152	518.233	319.152	156.118	154.089	319.152	218.099
S-410	173.096	116.087	144.118	189.084	174.11	158.133	117.035	180.044	158.133	142.102	174.11	292.128	241.078	204.12	219.107	248.127	245.062	243.094	217.104	176.09	232.114	254.108	230.136	174.11	246.13	267.082	188.089	217.104	217.103	217.104	217.104	217.104	319.153	217.104	297.093	357.11	156.081	370.139	142.102	256.162	273.093	264.105	307.153	518.233	319.153	156.118	154.09	319.153	218.099
S-105	173.096	116.087	144.117	189.084	174.11	158.133	117.035	180.044	158.133	142.102	174.11	292.13	241.078	204.12	219.107	248.127	245.061	243.094	217.104	176.089	232.115	254.109	230.134	174.11	246.13	267.081	188.089	217.103	217.104	217.104	217.104	217.104	319.153	217.103	297.092	357.109	156.082	370.137	142.102	256.162	273.093	264.106	307.153	518.233	319.152	156.118	154.089	319.152	218.099
S-344	173.096	116.087	144.117	189.084	174.11	158.133	117.035	180.044	158.133	142.102	174.11	292.131	241.078	204.12	219.107	248.127	245.062	243.094	217.104	176.089	232.114	254.109	230.135	174.11	246.13	267.082	188.089	217.103	217.101	217.103	217.103	217.104	319.152	217.103	297.092	357.109	156.081	370.14	142.102	256.161	273.093	264.105	307.152	518.233	319.152	156.118	154.089	319.152	218.099
S-254	173.096	116.087	144.117	189.084	174.11	158.133	117.035	180.044	158.133	142.102	174.11	292.129	241.078	204.12	219.107	248.127	245.062	243.094	217.104	176.089	232.114	254.108	230.135	174.11	246.13	267.082	188.089	217.103	217.103	217.103	217.103	217.103	319.152	217.104	297.091	357.109	156.081	370.136	142.102	256.161	273.093	264.104	307.152	518.232	319.152	156.118	154.089	319.152	218.099
S-325	173.096	116.087	144.117	189.084	174.11	158.133	117.035	180.044	158.133	142.102	174.11	292.13	241.078	204.12	219.107	248.127	245.062	243.094	217.104	176.089	232.114	254.11	230.135	174.11	246.13	267.082	188.089	217.104	217.104	217.104	217.104	217.104	319.153	217.104	297.092	357.109	156.081	370.135	142.102	256.159	273.093	264.105	307.153	518.232	319.153	156.118	154.089	319.152	218.099
S-359	173.097	116.087	144.117	189.084	174.11	158.133	117.035	180.044	158.133	142.102	174.11	292.128	241.077	204.12	219.107	248.127	245.062	243.094	217.103	176.089	232.114	254.107	230.134	174.11	246.129	267.082	188.089	217.102	217.103	217.103	217.103	NA	319.152	217.103	297.091	357.108	156.081	370.135	142.102	256.161	273.092	264.105	307.152	518.232	319.152	156.117	154.089	319.152	218.099
S-264	173.095	116.087	144.117	189.084	174.109	158.133	117.034	180.044	158.133	142.102	174.109	292.129	241.078	204.119	219.107	248.127	245.062	243.094	217.103	176.088	232.114	254.109	230.135	174.11	246.13	267.082	188.089	217.103	217.103	217.103	217.104	217.103	319.153	217.104	297.092	357.109	156.081	370.138	142.102	256.161	273.092	264.105	307.152	518.233	319.152	156.118	154.089	319.152	218.099
S-282	173.096	116.087	144.117	189.084	174.11	158.133	117.034	180.044	158.133	142.102	174.11	292.129	241.078	204.12	219.106	248.128	245.061	243.094	217.103	176.089	232.114	254.109	230.135	174.11	246.13	267.082	188.089	217.102	217.103	217.103	217.103	217.104	319.153	217.103	297.092	357.109	156.081	370.137	142.102	256.161	273.093	264.105	307.152	518.233	319.152	156.117	154.089	319.152	218.099
S-378	173.096	116.087	144.118	189.084	174.11	158.133	117.034	180.044	158.133	142.102	174.11	292.13	241.078	204.12	219.107	248.127	245.062	243.094	217.104	176.089	232.114	254.11	230.135	174.11	246.13	267.082	188.088	217.103	217.104	217.104	217.104	217.104	319.153	217.104	297.091	357.108	156.081	370.136	142.102	256.161	273.092	264.105	307.152	518.233	319.152	156.117	154.089	319.152	218.099
S-348	173.096	116.087	144.117	189.084	174.11	158.133	117.034	180.044	158.133	142.102	174.11	292.128	241.078	204.119	219.107	248.127	245.062	243.094	217.103	176.088	232.114	254.109	230.134	174.11	246.13	267.082	188.089	217.103	217.103	217.103	217.103	NA	319.152	217.103	297.092	357.107	156.082	370.139	142.102	256.159	273.093	264.105	307.152	518.232	319.152	156.117	154.089	319.152	218.099
S-278	173.096	116.087	144.117	189.084	174.109	158.133	117.034	180.044	158.133	142.102	174.109	292.128	241.077	204.119	219.106	248.127	245.061	243.094	217.103	176.089	232.114	254.11	230.134	174.109	246.13	267.082	188.089	217.103	217.103	217.103	217.103	217.103	319.152	217.103	297.091	357.108	156.081	370.137	142.102	256.161	273.092	264.104	307.152	518.232	319.152	156.118	154.089	319.152	218.099
S-221	173.095	116.087	144.117	189.084	174.11	158.133	117.034	180.044	158.133	142.102	174.11	292.128	241.077	204.119	219.106	248.127	245.061	243.093	217.103	176.089	232.114	254.109	230.135	174.11	246.129	267.081	188.089	217.103	217.103	217.103	217.103	217.103	319.152	217.103	297.091	357.108	156.081	370.138	142.101	256.161	273.092	264.104	307.152	518.232	319.152	156.117	154.089	319.152	218.099
S-220	173.095	116.087	144.117	189.084	174.109	158.133	117.034	180.044	158.133	142.102	174.11	292.129	241.078	204.12	219.106	248.128	245.062	243.094	217.104	176.089	232.114	254.11	230.135	174.109	246.129	267.082	188.089	217.103	217.103	217.103	217.103	217.103	319.152	217.103	297.091	357.109	156.081	370.138	142.102	256.161	273.092	264.105	307.152	518.232	319.152	156.117	154.089	319.152	218.099
S-341	173.096	116.087	144.117	189.084	174.11	158.133	117.034	180.044	158.133	142.102	174.109	292.128	241.078	204.12	219.106	248.126	245.062	243.094	217.103	176.089	232.114	254.11	230.135	174.11	246.13	267.082	188.088	217.103	217.103	217.103	217.103	217.103	319.152	217.103	297.091	357.108	156.081	370.137	142.101	256.159	273.092	264.104	307.152	518.232	319.152	156.118	154.089	319.152	218.099
S-338	173.096	116.087	144.117	189.084	174.109	158.133	117.035	180.044	158.133	142.102	174.11	292.128	241.078	204.119	219.106	248.126	245.061	243.094	217.103	176.089	232.114	254.11	230.134	174.109	246.129	267.081	188.089	217.104	217.103	217.103	217.103	217.103	319.152	217.103	297.091	357.107	156.081	370.137	142.102	256.161	273.092	264.104	307.152	518.231	319.151	156.117	154.089	319.151	218.098
S-358	173.096	116.087	144.117	189.083	174.109	158.133	117.034	180.044	158.133	142.102	174.109	292.128	241.077	204.119	219.106	248.127	245.061	243.093	217.103	176.089	232.114	254.109	230.135	174.109	246.129	267.081	188.089	217.104	217.103	217.103	217.103	217.103	319.152	217.102	297.091	357.108	156.081	370.138	142.102	256.161	273.092	264.104	307.152	518.231	319.152	156.117	154.089	319.152	218.099
S-287	173.095	116.087	144.117	189.084	174.109	158.133	117.034	180.044	158.133	142.102	174.109	292.13	241.078	204.12	219.106	248.127	245.061	243.093	217.103	176.089	232.114	254.109	230.134	174.109	246.129	267.082	188.088	217.103	217.102	217.103	217.103	217.104	319.152	217.103	297.092	357.11	156.081	370.137	142.102	256.161	273.092	264.104	307.152	518.232	319.152	156.117	154.089	319.152	218.099
S-321	173.096	116.086	144.116	189.083	174.109	158.133	117.034	180.044	158.132	142.101	174.109	292.128	241.077	204.119	219.106	248.127	245.061	243.093	217.103	176.088	232.114	254.109	230.134	174.109	246.129	267.082	188.088	217.103	217.103	217.103	217.103	217.103	319.152	217.103	297.091	357.107	156.081	370.137	142.101	256.16	273.092	264.104	307.152	518.231	319.151	156.117	154.089	319.151	218.098
S-246	173.096	116.087	144.117	189.084	174.109	158.133	117.034	180.044	158.133	142.102	174.109	292.128	241.078	204.12	219.106	248.126	245.062	243.093	217.103	176.089	232.114	254.11	230.134	174.109	246.129	267.081	188.089	217.103	217.103	217.103	217.103	217.103	319.152	217.103	297.091	357.109	156.081	370.137	142.101	256.161	273.092	264.104	307.152	518.231	319.151	156.117	154.089	319.152	218.099
S-244	173.096	116.087	144.117	189.084	174.109	158.133	117.034	180.044	158.132	142.101	174.109	292.126	241.078	204.119	219.106	248.126	245.061	243.093	217.103	176.089	232.114	254.11	230.134	174.109	246.129	267.081	188.088	217.103	217.103	217.103	217.103	NA	319.151	217.103	297.092	357.107	156.08	370.139	142.101	256.159	273.092	264.103	307.151	518.231	319.151	156.117	154.089	319.151	218.098
S-289	173.095	116.086	144.117	189.084	174.109	158.133	117.034	180.044	158.132	142.101	174.109	292.129	241.077	204.119	219.107	248.127	245.061	243.093	217.103	176.089	232.114	254.109	230.134	174.109	246.129	267.082	188.088	217.103	217.103	217.103	217.103	217.103	319.152	217.103	297.092	357.107	156.081	370.137	142.102	256.161	273.092	264.104	307.151	518.231	319.152	156.117	154.089	319.152	218.098
S-247	173.096	116.087	144.117	189.083	174.109	158.133	117.034	180.044	158.132	142.102	174.109	292.129	241.078	204.12	219.106	248.127	245.061	243.093	217.103	176.089	232.114	254.109	230.134	174.109	246.129	267.081	188.088	217.103	217.103	217.103	217.103	217.103	319.152	217.103	297.091	357.108	156.08	370.137	142.101	256.161	273.092	264.104	307.151	518.232	319.151	156.117	154.089	319.152	218.098
S-327	173.096	116.087	144.117	189.083	174.109	158.133	117.034	180.044	158.132	142.101	174.109	292.127	241.077	204.119	219.106	248.126	245.062	243.093	217.103	176.089	232.114	254.108	230.134	174.109	246.129	267.081	188.088	217.101	217.101	217.103	217.103	217.103	319.152	217.103	297.091	357.11	156.081	370.135	142.101	256.161	273.092	264.104	307.151	518.231	319.151	156.117	154.089	319.151	218.098
S-025	173.095	116.087	144.117	189.083	174.109	158.133	117.034	180.044	158.133	142.101	174.109	292.128	241.077	204.119	219.106	248.126	245.061	243.093	217.103	176.089	232.113	254.108	230.134	174.109	246.129	267.081	188.088	217.102	217.103	217.103	217.103	NA	319.151	217.103	297.091	357.108	156.08	370.136	142.101	256.161	273.092	264.104	307.152	518.231	319.151	156.117	154.089	319.151	218.098
S-231	173.095	116.087	144.117	189.083	174.109	158.132	117.034	180.043	158.132	142.101	174.109	292.13	241.077	204.119	219.106	248.126	245.061	243.093	217.103	176.089	232.113	254.109	230.134	174.109	246.129	267.081	188.088	217.103	217.103	217.103	217.103	217.103	319.152	217.103	297.091	357.107	156.081	370.136	142.101	256.161	273.092	264.104	307.151	518.23	319.151	156.117	154.089	319.152	218.098
S-074	173.095	116.086	144.117	189.083	174.109	158.132	117.034	180.044	158.132	142.102	174.109	292.128	241.077	204.119	219.106	248.126	245.061	243.093	217.103	176.089	232.113	254.109	230.135	174.109	246.129	267.081	188.088	217.103	217.102	217.103	217.103	217.103	319.152	217.103	297.091	357.107	156.081	370.139	142.102	256.161	273.092	264.104	307.152	518.231	319.152	156.117	154.089	319.152	218.098
S-108	173.096	116.087	144.117	189.083	174.109	158.133	117.034	180.044	158.132	142.101	174.109	292.128	241.077	204.119	219.106	248.127	245.061	243.093	217.103	176.088	232.114	254.108	230.135	174.109	246.129	267.082	188.088	217.102	217.103	217.103	217.103	217.103	319.152	217.103	297.091	357.107	156.081	370.137	142.102	256.161	273.092	264.104	307.151	518.231	319.152	156.117	154.089	319.151	218.098
S-162	173.09	116.086	144.117	189.083	174.109	158.133	117.034	180.043	158.132	142.101	174.109	292.127	241.077	204.119	219.106	248.126	245.061	243.093	217.103	176.088	232.113	254.109	230.134	174.109	246.129	267.081	188.088	217.103	217.102	217.103	217.103	217.103	319.152	217.103	297.092	357.108	156.081	370.136	142.101	256.16	273.092	264.104	307.151	518.23	319.152	156.117	154.089	319.151	218.098
S-116	173.095	116.086	144.117	189.083	174.109	158.132	117.034	180.044	158.133	142.101	174.109	292.129	241.078	204.119	219.106	248.126	245.062	243.093	217.103	176.088	232.113	254.108	230.134	174.109	246.129	267.081	188.088	217.103	217.102	217.103	217.103	217.103	319.152	217.103	297.091	357.107	156.08	370.136	142.101	256.161	273.092	264.104	307.151	518.231	319.151	156.117	154.089	319.151	218.098
S-098	173.096	116.087	144.117	189.083	174.109	158.133	117.034	180.044	158.133	142.102	174.109	292.128	241.078	204.119	219.106	248.126	245.061	243.093	217.103	176.088	232.114	254.109	230.133	174.109	246.129	267.081	188.088	217.103	217.103	217.103	217.103	217.103	319.152	217.103	297.091	357.108	156.081	370.136	142.101	256.16	273.092	264.104	307.151	518.231	319.151	156.117	154.089	319.151	218.098
S-276	173.095	116.087	144.117	189.083	174.111	158.132	117.034	180.043	158.132	142.101	174.109	292.128	241.077	204.119	219.105	248.126	245.061	243.093	217.103	176.088	232.113	254.108	230.134	174.109	246.129	267.081	188.088	217.102	217.101	217.103	217.102	217.103	319.152	217.103	297.091	357.111	156.081	370.137	142.101	256.16	273.091	264.104	307.151	518.231	319.151	156.117	154.089	319.151	218.098
S-147	173.095	116.086	144.117	189.083	174.109	158.132	117.034	180.044	158.132	142.101	174.109	292.127	241.077	204.119	219.105	248.126	245.061	243.093	217.103	176.089	232.114	254.108	230.135	174.109	246.129	267.081	188.088	217.102	217.102	217.103	217.103	217.103	319.152	217.103	297.092	357.107	156.081	370.133	142.101	256.16	273.092	264.104	307.152	518.231	319.151	156.117	154.089	319.151	218.098
S-055	173.095	116.086	144.117	189.083	174.109	158.132	117.034	180.044	158.133	142.101	174.109	292.127	241.077	204.119	219.105	248.126	245.06	243.093	217.103	176.088	232.113	254.108	230.134	174.109	246.129	267.081	188.088	217.102	217.102	217.103	217.102	217.103	319.151	217.103	297.09	357.107	156.08	370.136	142.101	256.16	273.092	264.103	307.151	518.23	319.151	156.117	154.088	319.151	218.098
S-406	173.095	116.086	144.117	189.083	174.109	158.132	117.034	180.043	158.132	142.101	174.109	292.127	241.077	204.119	219.106	248.125	245.061	243.093	217.103	176.088	232.113	254.107	230.134	174.109	246.129	267.081	188.088	217.103	217.101	217.103	217.103	217.103	319.151	217.103	297.091	357.108	156.08	370.137	142.101	256.161	273.092	264.104	307.151	518.231	319.151	156.117	154.088	319.151	218.098
S-050	173.095	116.086	144.117	189.083	174.109	158.132	117.034	180.043	158.132	142.101	174.109	292.129	241.077	204.119	219.106	248.126	245.06	243.093	217.102	176.088	232.113	254.108	230.134	174.109	246.128	267.081	188.088	217.102	217.102	217.102	217.102	NA	319.151	217.102	297.09	357.107	156.079	370.137	142.101	256.161	273.092	264.103	307.151	518.231	319.151	156.116	154.088	319.151	218.098
S-415	173.095	116.086	144.116	189.083	174.108	158.132	117.034	180.043	158.132	142.101	174.109	292.127	241.077	204.119	219.105	248.126	245.06	243.092	217.103	176.088	232.113	254.107	230.134	174.109	246.129	267.081	188.088	217.102	217.102	217.103	217.102	NA	319.151	217.103	297.091	357.107	156.08	370.138	142.101	256.16	273.092	264.104	307.151	518.231	319.151	156.117	154.089	319.151	218.098
S-208	173.095	116.086	144.117	189.083	174.109	158.132	117.034	180.043	158.132	142.101	174.109	292.128	241.077	204.119	219.106	248.126	245.061	243.093	217.103	176.088	232.113	254.108	230.133	174.109	246.129	267.081	188.088	217.102	217.101	217.103	217.103	217.102	319.152	217.102	297.091	357.11	156.081	370.137	142.101	256.16	273.091	264.104	307.151	518.231	319.151	156.117	154.089	319.151	218.098
S-184	173.094	116.086	144.116	189.083	174.109	158.132	117.034	180.043	158.132	142.101	174.109	292.127	241.076	204.119	219.105	248.126	245.061	243.092	217.103	176.088	232.113	254.109	230.134	174.109	246.129	267.08	188.088	217.103	217.102	217.102	217.103	217.102	319.151	217.103	297.09	357.107	156.08	370.135	142.101	256.161	273.091	264.104	307.151	518.231	319.151	156.117	154.089	319.151	218.098
S-012	173.095	116.086	144.117	189.083	174.109	158.132	117.034	180.043	158.132	142.101	174.109	292.128	241.077	204.119	219.105	248.125	245.061	243.093	217.102	176.088	232.113	254.109	230.133	174.109	246.129	267.081	188.088	217.102	217.102	217.102	217.102	217.103	319.151	217.102	297.091	357.107	156.08	370.138	142.101	256.16	273.092	264.104	307.151	518.231	319.151	156.117	154.089	319.151	218.098
S-095	173.095	116.086	144.117	189.083	174.109	158.132	117.034	180.043	158.132	142.101	174.109	292.128	241.077	204.119	219.105	248.126	245.061	243.093	217.103	176.088	232.113	254.108	230.134	174.109	246.129	267.081	188.088	217.103	217.102	217.102	217.102	217.103	319.151	217.102	297.091	357.108	156.08	370.137	142.101	256.161	273.091	264.104	307.151	518.23	319.151	156.117	154.089	319.151	218.098
S-197	173.095	116.086	144.117	189.083	174.109	158.132	117.034	180.043	158.132	142.101	174.109	292.127	241.077	204.119	219.105	248.125	245.061	243.093	217.103	176.088	232.113	254.107	230.134	174.109	246.128	267.08	188.088	217.102	217.102	217.102	217.102	217.102	319.151	217.102	297.09	357.107	156.08	370.136	142.101	256.16	273.091	264.103	307.151	518.23	319.151	156.117	154.089	319.151	218.098
S-143	173.095	116.086	144.116	189.083	174.109	158.132	117.034	180.043	158.132	142.101	174.109	292.127	241.077	204.119	219.106	248.127	245.061	243.093	217.103	176.089	232.113	254.11	230.134	174.109	246.129	267.081	188.088	217.102	217.103	217.103	217.102	217.103	319.152	217.102	297.091	357.107	156.08	370.137	142.101	256.16	273.092	264.104	307.151	518.231	319.151	156.117	154.089	319.151	218.098
S-084	173.094	116.086	144.117	189.083	174.109	158.132	117.034	180.043	158.132	142.101	174.109	292.128	241.077	204.119	219.106	248.126	245.061	243.092	217.103	176.089	232.113	254.109	230.134	174.109	246.129	267.081	188.088	217.102	217.102	217.103	217.102	217.103	319.151	217.103	297.091	357.107	156.08	370.135	142.102	256.161	273.092	264.104	307.151	518.231	319.151	156.117	154.089	319.151	218.098
S-302	173.095	116.086	144.117	189.083	174.109	158.132	117.034	180.043	158.132	142.101	174.109	292.128	241.077	204.119	219.106	248.126	245.061	243.093	217.103	176.087	232.113	254.109	230.133	174.109	246.129	267.081	188.088	217.102	217.102	217.103	217.103	217.103	319.151	217.102	297.091	357.107	156.081	370.137	142.102	256.159	273.091	264.104	307.152	518.231	319.151	156.117	154.089	319.151	218.098
S-279	173.095	116.087	144.117	189.083	174.109	158.132	117.034	180.043	158.132	142.101	174.109	292.127	241.077	204.119	219.106	248.126	245.061	243.093	217.103	176.089	232.114	254.107	230.134	174.109	246.129	267.081	188.088	217.103	217.103	217.103	217.103	217.103	319.152	217.102	297.091	357.108	156.081	370.137	142.101	256.161	273.092	264.104	307.151	518.23	319.152	156.117	154.089	319.151	218.098
S-295	173.095	116.087	144.117	189.084	174.109	158.132	117.034	180.044	158.132	142.101	174.109	292.128	241.077	204.119	219.106	248.126	245.061	243.093	217.103	176.089	232.114	254.108	230.134	174.109	246.129	267.081	188.088	217.103	217.102	217.103	217.103	217.103	319.152	217.101	297.092	357.109	156.081	370.135	142.101	256.161	273.092	264.104	307.151	518.232	319.152	156.117	154.089	319.151	218.098
S-210	173.096	116.086	144.117	189.083	174.109	158.132	117.034	180.044	158.132	142.102	174.109	292.129	241.077	204.119	219.106	248.126	245.06	243.093	217.103	176.088	232.113	254.109	230.134	174.109	246.129	267.081	188.088	217.103	217.103	217.103	217.103	217.103	319.152	217.103	297.091	357.108	156.081	370.136	142.102	256.161	273.092	264.104	307.152	518.231	319.151	156.117	154.089	319.151	218.098
S-019	173.095	116.087	144.117	189.083	174.109	158.133	117.034	180.044	158.132	142.102	174.109	292.127	241.077	204.119	219.106	248.127	245.061	243.093	217.103	176.089	232.114	254.109	230.134	174.109	246.129	267.081	188.088	217.103	217.103	217.103	217.103	217.103	319.152	217.102	297.091	357.108	156.081	370.137	142.102	256.161	273.092	264.104	307.152	518.231	319.152	156.117	154.089	319.151	218.099
S-027	173.095	116.087	144.117	189.083	174.109	158.133	117.034	180.044	158.133	142.102	174.109	292.127	241.077	204.119	219.106	248.127	245.061	243.093	217.103	176.089	232.114	254.108	230.134	174.109	246.129	267.081	188.088	217.103	217.103	217.103	217.103	217.103	319.152	217.102	297.091	357.108	156.081	370.138	142.101	256.161	273.092	264.104	307.152	518.231	319.152	156.117	154.089	319.151	218.098
S-058	173.095	116.087	144.117	189.083	174.109	158.133	117.034	180.044	158.132	142.101	174.109	292.126	241.078	204.119	219.106	248.127	245.061	243.093	217.103	176.089	232.114	254.108	230.134	174.109	246.129	267.081	188.088	217.103	217.103	217.103	217.103	217.103	319.152	217.103	297.091	357.107	156.081	370.135	142.101	256.16	273.091	264.104	307.152	518.23	319.151	156.117	154.089	319.151	218.098
S-205	173.096	116.087	144.117	189.083	174.109	158.133	117.034	180.044	158.133	142.101	174.109	292.129	241.077	204.119	219.106	248.127	245.061	243.093	217.103	176.089	232.114	254.109	NA	174.109	246.129	267.081	188.088	217.103	217.103	217.103	217.103	217.103	319.152	217.102	297.091	357.107	156.081	370.136	142.102	256.16	273.092	264.104	307.152	518.232	319.152	156.117	154.089	319.151	218.098
S-293	173.095	116.087	144.117	189.084	174.109	158.133	117.034	180.044	158.133	142.101	174.109	292.128	241.077	204.119	219.106	248.126	245.061	243.093	217.103	176.089	232.114	254.11	230.135	174.109	246.129	267.081	188.088	217.102	217.103	217.103	217.103	217.103	319.152	217.103	297.092	357.108	156.081	370.136	142.101	256.161	273.092	264.104	307.152	518.232	319.152	156.117	154.089	319.152	218.099
S-241	173.095	116.087	144.118	189.084	174.111	158.133	117.034	180.044	158.132	142.102	174.109	292.128	241.078	204.12	219.106	248.127	245.062	243.096	217.103	176.089	232.114	254.109	230.134	174.11	246.131	267.082	188.089	217.101	217.096	217.103	217.103	217.103	319.152	217.103	297.091	357.111	156.081	370.137	142.102	256.161	273.092	264.104	307.152	518.232	319.152	156.117	154.089	319.152	218.099
C-310	173.095	116.086	144.116	189.082	174.109	158.132	117.034	180.043	158.132	142.101	174.109	292.126	241.076	204.118	219.105	248.124	245.06	243.091	217.102	176.087	232.112	254.108	230.133	174.108	246.128	267.08	188.087	217.101	217.102	217.102	217.102	217.102	319.151	217.102	297.089	357.105	156.08	370.135	142.101	256.159	273.091	264.103	307.15	518.228	319.15	156.116	154.088	319.15	218.097
C-312	173.094	116.086	144.115	189.083	174.108	158.132	117.034	180.043	158.132	142.101	174.109	292.126	241.076	204.118	219.105	248.125	245.06	243.092	217.102	176.088	232.113	254.107	230.133	174.108	246.128	267.08	188.087	217.103	217.101	217.102	217.102	217.102	319.15	217.102	297.092	357.105	156.08	370.134	142.101	256.157	273.091	264.103	307.149	518.228	319.149	156.117	154.088	319.15	218.097
C-316	173.094	116.086	144.116	189.083	174.108	158.132	117.034	180.043	158.132	142.101	174.108	292.127	241.072	204.118	219.106	248.126	245.06	243.092	217.103	176.088	232.113	254.108	230.133	174.109	246.127	267.081	188.087	217.101	217.101	217.103	217.102	217.103	319.151	217.102	297.09	357.107	156.08	370.131	142.101	256.159	273.09	264.103	307.15	518.228	319.15	156.116	154.088	319.15	218.097
C-317	173.095	116.086	144.113	189.083	174.108	158.132	117.034	180.043	158.131	142.101	174.109	292.126	241.076	204.118	219.105	248.126	245.06	243.092	217.102	176.088	232.113	254.108	230.132	174.109	246.128	267.079	188.087	217.102	217.102	217.102	217.102	217.102	319.151	217.102	297.089	357.106	156.08	370.135	142.1	NA	273.09	264.104	307.149	518.228	319.15	156.116	154.088	319.149	218.097
C-320	173.094	116.086	144.116	189.082	174.108	158.132	117.034	180.043	158.132	142.101	174.108	292.125	241.076	204.118	219.105	248.125	245.06	243.092	217.102	176.088	232.113	254.108	230.133	174.108	246.127	267.079	188.087	217.102	217.101	217.102	217.102	217.102	319.151	217.101	297.09	357.104	156.08	370.134	142.1	256.147	273.09	264.102	307.149	518.228	319.149	156.116	154.088	319.149	218.097
C-321	173.094	116.086	144.115	189.082	174.108	158.131	117.034	180.043	158.131	142.101	174.108	292.126	241.077	204.118	219.105	248.125	245.06	243.091	217.102	176.088	232.112	254.107	230.133	174.108	246.128	267.08	188.087	217.101	217.102	217.102	217.101	217.102	319.151	217.101	297.09	357.104	156.08	370.135	142.1	256.156	273.09	264.102	307.15	518.227	319.149	156.116	154.088	319.149	218.097
C-322	173.094	116.086	144.114	189.082	174.108	158.131	117.034	180.042	158.131	142.101	174.108	292.127	241.074	204.118	219.104	248.125	245.059	243.091	217.102	176.087	232.112	254.105	230.133	174.107	246.127	267.079	188.087	217.101	217.102	217.102	217.102	217.102	319.151	217.101	297.089	357.105	156.08	370.135	142.1	256.158	273.091	264.102	307.15	518.227	319.15	156.116	154.088	319.149	218.097
C-324	173.095	116.086	144.116	189.083	174.108	158.132	117.034	180.043	158.131	142.101	174.108	292.132	241.077	204.118	219.105	248.125	245.059	243.091	217.102	176.088	232.112	254.11	230.133	174.108	246.127	267.079	188.087	217.101	217.101	217.101	217.101	217.102	319.15	217.102	297.088	357.105	156.08	370.132	142.1	256.159	273.09	264.103	307.15	518.228	319.15	156.116	154.088	319.149	218.097
C-325	173.094	116.086	144.115	189.082	174.108	158.131	117.034	180.042	158.132	142.101	174.108	292.127	241.075	204.118	219.105	248.125	245.059	243.092	217.102	176.088	232.112	254.106	230.133	174.108	246.127	267.079	188.087	217.1	217.1	217.101	217.102	217.102	319.151	217.101	297.09	357.105	156.08	370.133	142.101	256.158	273.09	264.102	307.15	518.228	319.15	156.116	154.088	319.149	218.097
C-326	173.094	116.086	144.115	189.082	174.108	158.132	117.034	180.042	158.131	142.101	174.108	292.126	241.076	204.118	219.104	248.124	245.06	243.091	217.102	176.087	232.112	254.111	230.133	174.108	246.127	267.079	188.087	217.101	217.101	217.101	217.101	NA	319.151	217.101	297.089	357.104	156.08	370.135	142.101	256.158	273.09	264.102	307.149	518.227	319.15	156.116	154.088	319.149	218.096
C-327	173.095	116.086	144.115	189.082	174.108	158.131	117.034	180.042	158.131	142.101	174.108	292.127	241.077	204.118	219.104	248.125	245.058	243.091	217.102	176.088	232.112	254.107	230.132	174.108	246.127	267.079	188.087	217.102	217.1	217.101	217.101	217.102	319.151	217.101	297.089	357.104	156.08	370.134	142.101	256.159	273.09	264.102	307.149	518.227	319.149	156.116	154.088	319.149	218.097
S-001	173.094	116.086	144.116	189.082	174.108	158.131	117.034	180.043	158.131	142.101	174.108	292.124	241.076	204.118	219.104	248.125	245.06	243.091	217.102	176.088	232.112	254.108	230.133	174.108	246.127	267.08	188.087	217.101	217.101	217.101	217.101	217.101	319.151	217.102	297.09	357.106	156.08	370.13	142.101	256.158	273.09	264.103	307.149	518.228	319.149	156.116	154.088	319.15	218.097
S-004	173.094	116.086	144.116	189.082	174.108	158.132	117.034	180.043	158.131	142.101	174.108	292.125	241.076	204.118	219.105	248.125	245.059	243.091	217.102	176.088	232.112	254.105	230.132	174.108	246.127	267.079	188.087	217.102	217.101	217.101	217.102	NA	319.15	217.101	297.089	357.104	156.08	370.135	142.1	256.158	273.09	264.102	307.15	518.227	319.149	156.116	154.088	319.149	218.097
S-009	173.095	116.086	144.116	189.083	174.108	158.132	117.035	180.043	158.132	142.101	174.108	292.125	241.076	204.118	219.105	248.125	245.059	243.091	217.102	176.088	232.113	254.11	230.133	174.108	246.128	267.08	188.088	217.102	217.101	217.102	217.102	217.102	319.152	217.102	297.09	357.107	156.08	370.131	142.101	256.159	273.091	264.103	307.15	518.229	319.15	156.117	154.088	319.15	218.098
S-015	173.095	116.086	144.116	189.082	174.108	158.132	117.034	180.043	158.132	142.101	174.108	292.126	241.076	204.118	219.104	248.125	245.059	243.092	217.102	176.087	232.112	254.107	230.133	174.108	246.128	267.079	188.087	217.101	217.101	217.102	217.102	217.102	319.15	217.102	297.09	357.106	156.08	370.14	142.101	256.159	273.091	264.102	307.15	518.229	319.149	156.117	154.088	319.149	218.097
S-020	173.095	116.086	144.116	189.082	174.108	158.132	117.034	180.043	158.131	142.1	174.108	292.126	241.076	204.118	219.105	248.124	245.059	243.092	217.102	176.088	232.112	254.107	230.133	174.108	246.128	267.08	188.087	217.101	217.102	217.101	217.102	217.102	319.151	217.102	297.09	357.107	156.08	370.132	142.101	256.159	273.09	264.103	307.15	518.228	319.15	156.116	154.088	319.149	218.097
S-022	173.094	116.086	144.116	189.082	174.108	158.132	117.034	180.043	158.132	142.101	174.108	292.125	241.075	204.118	219.105	248.125	245.059	243.091	217.102	176.087	232.112	254.107	230.133	174.108	246.128	267.079	188.087	217.102	217.101	217.102	217.102	217.101	319.151	217.101	297.089	357.104	156.08	370.135	142.1	256.159	273.09	264.103	307.149	518.228	319.15	156.116	154.088	319.149	218.097
S-023	173.094	116.086	144.116	189.083	174.109	158.132	117.034	180.043	158.132	142.101	174.108	292.126	241.077	204.118	219.105	248.125	245.06	243.091	217.102	176.088	232.112	254.107	230.133	174.108	246.128	267.08	188.087	217.102	217.102	217.101	217.102	217.102	319.152	217.102	297.09	357.108	156.08	370.134	142.101	256.159	273.09	264.103	307.15	518.228	319.15	156.116	154.088	319.149	218.097
S-028	173.094	116.086	144.115	189.082	174.108	158.132	117.034	180.043	158.131	142.101	174.108	292.126	241.076	204.118	219.104	248.124	245.06	243.091	217.102	176.088	232.112	254.107	230.133	174.108	246.127	267.079	188.087	217.101	217.102	217.101	217.102	217.102	319.15	217.102	297.09	357.104	156.079	370.136	142.1	256.159	273.09	264.102	307.15	518.228	319.149	156.116	154.088	319.149	218.097
S-031	173.095	116.086	144.115	189.082	174.108	158.132	117.034	180.042	158.131	142.101	174.108	292.127	241.076	204.118	219.105	248.126	245.059	243.091	217.102	176.088	232.112	254.108	230.132	174.108	246.127	267.079	188.087	217.101	217.102	217.101	217.102	217.102	319.151	217.101	297.089	357.105	156.08	370.134	142.101	256.161	273.09	264.103	307.15	518.229	319.149	156.116	154.088	319.149	218.097
S-035	173.094	116.086	144.116	189.082	174.108	158.132	117.034	180.043	158.132	142.101	174.108	292.125	241.076	204.118	219.105	248.125	245.06	243.091	217.102	176.088	232.113	254.106	230.133	174.108	246.127	267.079	188.087	217.1	217.1	217.101	217.102	217.102	319.15	217.102	297.089	357.106	156.08	370.133	142.101	256.159	273.09	264.102	307.15	518.228	319.15	156.116	154.088	319.149	218.097
S-037	173.094	116.086	144.115	189.082	174.108	158.132	117.034	180.042	158.131	142.104	174.108	292.126	241.075	204.118	219.104	248.125	245.059	243.091	217.101	176.088	232.112	254.108	230.133	174.108	246.127	267.079	188.087	217.101	217.101	217.101	217.101	217.102	319.15	NA	297.09	357.105	156.08	370.135	142.101	256.159	273.09	264.103	307.149	518.227	319.149	156.116	154.088	319.149	218.097
S-042	173.094	116.086	144.116	189.082	174.108	158.132	117.034	180.042	158.131	142.101	174.108	292.125	241.076	204.118	219.104	248.124	245.058	243.092	217.102	176.087	232.112	254.107	230.132	174.108	246.127	267.079	188.087	217.101	217.101	217.101	217.101	NA	319.151	217.101	297.089	357.107	156.08	370.131	142.1	256.159	273.09	264.102	307.149	518.227	319.149	156.116	154.088	319.149	218.097
S-045	173.094	116.086	144.116	189.082	174.108	158.132	117.034	180.042	158.131	142.101	174.108	292.127	241.076	204.118	219.105	248.126	245.059	243.091	217.102	176.087	232.112	254.107	230.133	174.108	246.128	267.08	188.087	217.101	217.102	217.102	217.102	217.102	319.151	217.101	297.09	357.105	156.08	370.135	142.101	256.158	273.09	264.102	307.149	518.228	319.149	156.116	154.088	319.149	218.097
S-051	173.094	116.086	144.115	189.082	174.108	158.132	117.034	180.043	158.131	142.101	174.108	292.124	241.075	204.118	219.104	248.125	245.058	243.091	217.102	176.087	232.112	254.107	230.132	174.108	246.127	267.08	188.087	NA	217.1	217.101	217.102	217.102	319.15	217.101	297.088	357.105	156.08	370.132	142.1	256.158	273.09	264.103	307.149	518.228	319.149	156.116	154.088	319.149	218.097
S-052	173.094	116.086	144.115	189.082	174.108	158.131	117.034	180.043	158.132	142.101	174.108	292.127	241.075	204.118	219.105	248.125	245.059	243.091	217.102	176.088	232.112	254.107	230.133	174.108	246.127	267.079	188.087	217.101	217.102	217.102	217.102	217.102	319.151	217.102	297.09	357.105	156.08	370.133	142.101	256.158	273.09	264.102	307.149	518.227	319.15	156.116	154.088	319.149	218.097
[truncated: 279 more rows]
[truncated: 24 more columns]

## Sheet: Sample information
Sample	Treatment	FW	Ext.batch	Run	Split	NSFTV.Id	IRGC.Id	Country.of.Origin	Sub-populaiton	Common.Name
[truncated: 402 more rows]

[truncated: 1 more sheets: Metabolite names]
